# Supplementary material
Source: publisher site journal article supplement (https://www.dovepress.com/article/305281)
Supplement: Supplementary file 1 [file get_supplementary_file.php]

# Supplementary datas

**Supplementary data 1**

The sequence information of plasmid pKP12-100 extracted from a KPC-producing *K. pneumoniae* KP100-12 isolated from Huashan Hospital.

**Supplementary data 2**

All isolates collected in this study were listed in this file.

**Supplementary data 3**

The table of primers used for screening of carbapenemases genes in this study.

**Supplementary data 4**

The sequence information of *E. coli* A59 with *bla*KPC isolated from Huashan Hospital.

**Supplementary data 5**

The 280-bp sequences upstream of the *bla*KPC in KP100-12 and EC-A59 indicating that they shared the same promoter region of *bla*KPC.

## Supplementary data 1

>NODE_1_length_3308_cov_36.533855

CCGAGGCAGGAGCCCGGTGCGTAAATCGCGCACGCCGGGATCTGTGCGGGGGGTATCCGG

TAACGGGTATCCCTACCGCGACATTCAATGTATTTTTTACTTAGGAGCATACATGTTCAT

GATTAATCTGTTTCTTTATCACTTCCAGTTACTTTAACTTTGTCTTTGATTGTATTCAAA

AATGACGCAAAGCTCGGTGGTTGCTCTGTCTGACCTGAAAATGCAGAGTCACCTGAAATA

TTCCAATCCTTAAAGACTTCTATTGCATCCTCTTTAGTTGCTGTAGAACCGTATATCTGC

AAAAAAACTTGACCAAACATCAAAGCATGTCGACGATCTTTTCGCCTGATCGATTCATGT

GTGTACTTTTTTGAGTTACTAAGGCAGATATATGATAGCCATGAAAGAATGGCGATTCCA

ACTAATCCTCGCGTGAAGATATATATTAACTGAAGGTTAGTGAGATTTTTTAAATCTAAG

TTCATGTATAATGTAAAAAAAGCAGATATTACCGCAAGGAAGCCAAAAAATACCCCAGCA

ATAGACCAGATAATAGACATCAATATAAAATGTTTGTCATCACTAGCAAGATCTGATTTA

ACATCGTTAACATAGGTGGGGATTTTTTCATCGATTCTTTGTTGCTGTACTTGGCTACGG

AGTTCCTTATTTTCACTAATCAAAGAATTAACTTGTTTTACGTTTTTTTCGATTATTGCG

TTTTTTCTATTAAGATCCTGAGTATAATGCTCTAACTGTAGAGTTAATATGCTGTTTCGT

TCTTCTAATTGTATTATATGTTCTACATAATTATTAGGTTCAAGTGATTTTACATTTTTT

CTTTTATTAGTTTCATTTTCATTTATATTGGGTTCTTCATCCATCTGTGGCCTAGTCATG

TATTTTTCAATTAGTGCTAGGTTATTATGAGCTTCAGAAAACTCTCCTGCTTCTATTAAG

TTTTTTATATGAGAGTAGAAGTGTTTTGCTATATTTTCAGACTGTGAATTAAGCAAGTCT

AATAGGTGTTTTTTTATTTCGCTATCTTTATTGGTTGGTTCAGTCATGATGTTTCTCTTT

ATACATTTTTAGTAAAAACTCTTTTACATTTTGCCAAAACGATAATGTCAGTAAGTAAGC

ATTCAAAACTTGCGTTAGTGCCTACAACTTTAACCATACCAACGGGTATGCGAGTCAAAT

CTTTGATGCTTATTTTCCCTTCAATATTCACAAGCCACTTGCCATCAGTAACTTCATTAA

ATTTTGATTCTACAATATATATTTCCTCATCAATGAATACTGCTAAAGGTTGCAGAAAGG

TTCCTTCTAACAACTTAGAGTCAAAAGTCAAAACGGTTTCTTGAGCAAGAGATCCATCAA

TTATTTTATGATATGGGATAGTGATAGTATTGATTCGAGGCTTTTCAAACATTGCCCCGT

TACCAGTGGTTAGCCATGTTAATGAAGCACCAGTTTCCAGTGAGCATTGAATAATCCAGT

CAGCAGGAAAGGTATCTCTCATGTAACGATTGGCTAATGTACTTTTTGATACACCAATAT

GATCAGCTAAAGCTTGTCTTGTCTTAAATCCATAAGCCAAAACGATTCGCTCTATTGCTG

CTTTTCCGCCTTGGTTAATAGTAAAAAAGTTCTCATTTTGGATGTCTTGTTCTCTATTGA

GATGTTGATGCTTGCTGTCACAATTGTTGTGACTTTTTTCTGCATTATTTGTAATTCTTC

CCTTCTCTGTATCAGTGCCAAATGCCAACCACTCGACCGGCACTCCAGTCTCCATGCTAC

AGATAACGACCCAATCAGCAGGGAAAGTGTCACGGGCATACCTGTTCGCCATTGTACTTT

GCGATATACCTAGGTGATTACAGAATGCTTGTCGGGAAGAAAAACCATAGGCTTTCAGTA

TCCGAGCTATAACCGATTGCCCTCCGCGATTCTGCATGATTAAGGATTTCTTTTTTTCGT

CCACATGGCGAAATGTGATTTCGTGTGTTGACATAACCGATTTGTGATCCTATTCTCCGA

AATGTGAAGTTGAAGCCACGATTAAAACTGACTCACCACAAGCCAATAGGAGATGTTGCA

TCATGACCCCTAACATTTCAATAACCCTGAATACGCCACATGTCACAATTGAGCGTTATA

GCGAACTTACTGGTCTTTCAATCGACACAATTAACGATATGCTGGCTGACGGTCGCATCC

CTCGGCATCGCCTTCGGAAAGACAAGAAAAGAGAAAAGGTGATGATCAACCTTGCTGCTC

TTACCGTTGATGCACTTACTGATTGCAATGTTGTATTCAACTAGTTCCATTTTGGGATGC

ATCAGGGGTGTCGACCATGTTTGATTACCAAGTTTCCAAACATCCACATTTTGATGAAGC

CTGTCGTGCATTCGCATTGCGCCACAACCTGGTGCAACTGGCAGAACGTGCTGGCATGAA

TGTGCAGATTCTGCGGAACAAGCTGAACCCAGCTCAACCTCATTTATTAACCGCACCAGA

AATCTGGCTGCTTACCGATCTGACTGAAGATTCAACGCTGGTAGATGGTTTTCTGGCACA

GATTCATTGTCTGCCATGTGTACCGATTAATGAGGTGGCAAAAGAGAAACTGCCACATTA

CGTCATGAGTGCAACCGCAGAGATCGGGCGTGTTGCAGCAGGTGCGGTATCTGGCGATGT

AAAAACCAGTGCAGGTCGTCGTGATGCTATCAGCAGCATTAACTCTGTAACACGACTGAT

GGCGCTGGCCGCTGTTTCATTGCAGGCCCGTTTACAGGCTAATCCTGCGATGGCGAGTGC

AGTTGATACCGTGACTGGCCTCGGTGCTTCATTCGGTTTGCTGTGAGGTGCTTATGCTGA

CGAAAGAACCATCATTTGCATCGCTGCTGGTAAAACAAAGTCCGGCAATGCACTACGGGC

ACGGCTGGATCATGGGTGAGGATGGTAAACGCTGGCATCCGTGCCGTTCACAAGATGAAT

TGCTGGCAGAACTATCTACGAAAAAACAGGGGAACAAATGGCTATTGAAGGCGCTGCGGC

GACTGTTCCATTAAGCCCCGGTGAACGCCTGAACGGACTTAATCACATTGCGGAATTAAG

GGCGAAAGTATTTGGCCTGAATATTGAGTCAGAGCTTGAGCGGTTTATTAAAGATATGCG

TGATCCACGGGATATCAATAATGAACAAAATAAACGGGCACTGGCTGCCATATTCTTTAT

GGCAAAAATCCCAGCTGAACGTCATAGCATCAGCATTAATGAGCTGACCACTGACGAAAA

GCGGGAGCTGATTAAAGCAATGAATCATTTTCGTGCAGTGGTGAGCTTATTTCCCAGACG

GCTAACCATGCCGAATTAACCAACTAATGAAA

>NODE_3_length_7244_cov_142.281067

GGCCGAACGGGGCCAGTTGCAGGTAGGTGCGCAGTTCCTGGGCATGCTCGCGACGGGTCA

CGTCGCGCTCGCCGTACTTTGCCCAGCTCGCCGGCTCGGCCTGGACTTGCTTCGCCACCC

ACAGGATGACCGGCTCGGGCAGCTCGCTGTCGGTTCCCAGCGCGTAACCGGGGTAGCGCA

GCAGGCAGAGCTGCACGGCGAAGCCGAGGCGGTTGGCGTCGCCGCGTCGCTGGCGGATCA

GCGACAGGTCGGAGTCGTTGAAGGTGTAGTAGCGGATCAGGTCATCCTGGCTTTCCGGCA

GCGCAAGCAGGGTGTCCCGCTCCGTGGCCGAGAGGATCAAGCGACGCGGCATGTGTCAGT

CGTCCGTGCGGAGGTACTGGTAGAGGGTTTCCCGGCTGATGTTGAACTCGCGGGCAAGCT

GCGCCTTGGGCTCGCCGGCCGTCGCTCGCTGCCGCAGGGTAGCAGCCTGCTCATCGGACA

GGGCTTTCTTGCGGCCCCGGTACGCGCCACGCTGCTTGGCCAAGGCGATGCCCTCACGCT

GCCGCTCGCGGATCAGGGCGCGCTCGAACTCAGCGAAGGCCCCCATCACCGACAGCATCA

GGTTGGCCATCGGCGAGTCCTCGCCAGTGAACACCAGGCCCTCCTTCAGGAACTCGATGC

GCACGCCGCGCTGAGTCAGCTTCTGTACCAAGCGACGCAGGTCATCGAGGTTGCGGGCCA

GCCGATCCATGCTGTGCACCACCACTGTATCGCCTTCGCGGACGAAGCTCAGCAGCGCTT

CGAGCTGGGGGCGCTGGGTGTCCTTGCCCGATGCCTTGTCGGTGAACACCTTGCTCACCT

GGGTTTGTTCCAGCTGGCGTTCCGGGTTCTGGTCAAAGCTGCTGACCCGGACGTAGCCGA

TGCGGTGCCCCTGCACGATGTCTCCTTGGTTGAAGGCGGCTTAAGTGCACTTTCTGTTCC

GTTGTGCCTCAAAGCCCATTTCTGTCAGGCTGAAATCTATAACCTTCGCGGGCATGTGTC

AAAAAATGGGAAAGCAGACTCTATTCTGACGAAGCGGCGCGGCCCTGCCTGACATCAAGT

TAGGGTATAGCCTAGATTGACATGCGCGATGCAACCCTTAACTTGCTTGCACCTATCGTT

TCCATGCTAGCTTTATCGTAACGCTAAGGAAGCTCTGAAAAAGCCCATGTTTCGCGAAAT

CACCGCTCTGTAACCCGCATGGTTGCTGGGATGCATTTCTCGAGCGGGGGCTTTTTCAGA

CCTTCCTTAGCTTAGCGTACGATTTTTTCCGAATTCTGCGGTTCCCCCTGGAAGACCTAC

GCAAGTTGGGCCAGCTCAGAGGTGGAATCAACGAAGGCGAGCGAATGAGGCATCTTTTCT

GGCGTCTTAACTTTCTCCTTCTCTCCGGGGCAACAAACAGCGCCCAGATGTACCATGAGG

CCGCCGCTCTTTCCTCCGAGCTGGATACTCGTTGGTCTTACCGCTCCAAAGAGCTTATGA

CGCTCTACAGCAAGGCGAAATCCTATGAGGCTGGGGAACGTGTCGAGTTCGGCGGAAAGT

CGTTTGCACCGCTATACACGCCCAAAAACGACACGCTGATCAACCTATTCCAGATCTCAC

AGCAAGAACAAGAGCAACTGAAGACGATTATCAGCACTGACGAGGCTCAGAAGCGCCGCA

GAGAGCGCGATAGACTGCGTGATGAAGAACGTCGCCGCGCCGCTGGCCAGCTTGAGCGTG

AAGCCTATGAAGCCAACTCATTGAGCAGGCAAAAGCCCTGGGAAGCTATGGGCATGAGCC

GGGCTAAATGGTATCGCCTGGGCAAGCCTTCACCTCAACAAAACAGTGAGACAAGTCCCT

CCCCTATTACTAATGGCGAAGCCTCAGCGGTTGCCCTTCAGGCGGCCAGGTGTAAAGCCG

TTTAGATGGCTATTTCAAAGTGAGTGAGATTTCGTAACGGATGGCAGCCCTAGAGGCTGC

TTTCTTTTGAGGGGTTAGCAGGCGTATAGCCATGCTGGATCTCAGTCTATCACTACCTGC

TTAATATTCCACCTTTAGATCCGGCAGCAGTTCGACCAGGTGGCCAACTTACCAGGCACC

GGCAGCAGCTCGACCGGGTGGCCAAGTTCAGATCTGGACGCCAGAAGGAAATCAACCAGG

TGGCCAACTTACCAGGCACCGGCAGCAGCTCGACCAGGTGGCCAAGTTCAGATCTGGACG

CCAGAAGGAAATCAACCAGGTGGCCAACTCACCAGGCATCGGCAGCAGCTCGACCAGGTG

GCCCATTTCGTACGTACGAAATCAGGCGACGCTATGCGAAATCTTGGCGGCAATCCCCCG

CGACTACGTGATTTTTTTAACGTAGAGCGCGCTTTTTCTTGCCATAGTAGGCCATTTTGG

CCTATAATCTTAATTAAGAAGACCGGGCACCCGCCACGGTCAATACCGGAGAACTCCGAT

GATCCACACAGCTAACCGCACCTTTCACCAACTCTATCGAGAATGGATACGCGAACGCCG

CGAGCATATGCACAACGTTTTGACCTGGGAGCGTGATCGTTACGGTGCTCGCCTCGTCGG

TCTGTTTTATCGTTACTGCAAGGTGGCCAACCCCTTTCCCCGTTGCACTCTGAATACTCG

GATCAACTACCGCGCCCATGCGGTGAATCTGCCAGATTGGCCAGCCCGCAGCCTGGAGCT

GAATAAAATGTGGCTCAGTTGGAGAGAAAAAAAGTAGGCCGATTTGGCCTATTTTTTATT

GTACCCGCTTGACACAATAGGCCAAAATGGCCTATTATATATCTCAGAAGGCCGGGCACC

CGCCACGGTCAATACCGGAGAACTCCGATGATGCAAACAGAACTTAATCCCCTGATCTGC

TCCCTGGTCGCCACCCCTCGCCGTATGGCTGCAATGCCCCGCTATGTAGGCCGTTTCTAT

GTGGTTTTCGAGTCGATGCTTTACCAGCAAATGAAAGGGCTCTGCCGCGAGTATCGCGGG

GCTTATTGGCTTATGTGGGAGCTGTCGAACGGCGGCTTTTATATGGCTCCTGGGCGTCGT

GATGAAATGCTGAACATCGAGGCCATGAACTACTTTAGTGGCCAAATGAGCGCCGATGCT

GCCGGGATTACCGCTTGCCTCTACCTCTATAGCCATCTGTCATTTCACACAGAAGGCGCT

GACCAGGAGCGGTTTTCAAGGCTGTATCACAGCTTGCGGGATTGGGCTTGTGAGCATGAC

GAAAAAGAGGCCATCTTGGCCGCAATAGACTAGCAACAGAAAGCCCCGGTGATGGCCGGG

GCTCTTAAAGGAGGTGCATAGGTAGAAAAAGAAATGGTGCCCCTGGTATGGCTGCAACCA

ATCACAGGGGCTTTCACCGGTCAATTTGAGGATAAACGCGATGAATACGGATATTGTATC

ACTTGCAAAACACATTGGCGACGCTCTGACGGCCCGCCGCCCCGTTCATATGCCGCGCAT

GAAGATGCGGGAGCTTGGCTTGCTCTTGATTGAACTGAAGGCGTATCGGGAGGCCGCCGC

GACCGTTACCCATTGATAAAAAAGCCCCGGCATTGACCGGGGCTATTTGAGGATTTATCG

CATGATTAGACCTGAAACGCTTAGGCCGTTCGCTGAAGATTGGCAGGCTCCAACCGCCGA

TGAAATCAAAGAGGTGTTGGAGCTGATTAGGCAACGAAAAGGGCTTAGTAAGCCTCTCAG

TGGCGTTGATGTCGCTGATCTCGTTGGTTTGCCTGGTGAGAGAGGCAGCGGAAAGGGAAC

CCGAACCTTCAGGCGTTGGGTGAGCAAAACCAACCCTAGCCCTATTGCTTATGGTGCCTG

GTCTATCTTGGCCCACCTGGCAGGTTTCGGGGCTATATGGGACGCTGACCGGGATTGAAA

CCATGACCGAACATAAGGCCGAACGTGCTCCCTGGGGAGACTTCCCGGCAGTAGTGAGGA

ACGGCGATCTAAAGGATCTCTCTAAAGAACCTGAATACGAAGCCGCCAAACATGGCGACC

ACAAGGCGATGAGCTATAAGCGCATGAAGCCGGCCGAGGACGAATTGCATTGCGAGATCA

AGGCGCTGCTTGATCGCGCCAAGGCTACCGACGACCAGGAGCGTAACGAGCCGGAGCTGG

ACATTCCTGCCGAGATTTCTCGCCGCGAGAAGCGCCTGGAGGCGATCCAGGCGGCAAAGG

CGCGCCTGGAAGCGCGCCAGCGTGAAGCGGACCAGGCCCGGGGGCGCAGCGAAGACGATG

GCCGCCGGCCTCGCCATCCGGATGGCTCGGACAAGGGCGGTGGCTCGTACAAACGCGAGT

TTGGTGTGCCGGATGACCGTGATCAGGAAAGCTTCACCGATCCGGACAGCCGGATCATGA

AACACGCCGGTGGTGGCTCCGAGCAGAGCTACAACGGGTACACAGCGGTCGATGCCGAGC

ACCAGATCATCGTGGCGGCGGAGTTGACCAACTGCGCCGCGGACAGTCAGGCGCTGCTGG

GCATGCTGGCAGCAGTTCAGGCCAACACCGGAGAAATGCCGGCCCAGACGCTGGCGGATG

CGGGATTCCGTAGTGAGGCTGTTCTGGCAAAGGTCGCCGATCACCACGGCGATGTCATCG

TTGCCCTCGGCCGCGAGGGACGTGAAGATGCCAAGGTCAATGCCAAGACCCATCCGCATA

CGGCGGCGATTGCGGCGAAATTGAAAACGGAGCAAGGCGATGCAGCTTACCGCCGGCGCA

AGTCGATCGTGGAGGCTCCGAATGGTTGGATCAAGGCGGTGATGGGATTGCGTCAGTTCA

GCATGAGGGGCCTGGACAAGGTGCAAGCCGAGTGGAAGCTCGTCTGCATGGCGCTAAATC

TGAGGCGAATGGCGTATCTGTGAGGGCGAAGGTTAAATGGGGCGGCTCAAATGCACCCCA

GTCGTCATAACACGCCGCGCGCCGCAAGATTGGTATCCTTGGCGCCGACGCCTTGCCAAT

TGCAGAGAGCGCCGCCGCCATCGTCAGTGCTCTACAGAAAACCGGTCACACGGCTCTGCC

GCGCAGACTCCTAGCCTAAATGTGACAGTGGTTGGTAATCCATGCCGCCCGCAAGGGCGG

CGGTGGTGGGCCAATAGATGATTTTCAGAGCCTTACTGCCCGTTGACGCCCAATCCCTCG

AGCGCGAGTCTAGCCGCAGCGGCGATGACGGCCTCGCTGTGCTTGTCATCCTTGTTAGGC

GCCCGGGTGTAGACGGCCAACACAATAGGTGCGCGCCCAGTGGGCCAGACGACGGCATAG

TCATTTGCCGTGCCATACACTCCGCAGGTTCCGGTTTTGTCTCCGACTGCCCAGTCTGCC

GGCACCGCCGCGCGGATGCGGTGGTTGCCGGTCGTGTTTCCCTTTAGCCAATCAACAAAC

TGCTGCCGCTGCGGCGCAGCCAGTGCAGAGCCCAGTGTCAGTTTTTGTAAGCTTTCCGTC

ACGGCGCGCGGCGATGAGGTATCGCGCGCATCGCCTGGGATGGCGGAGTTCAGCTCCAGC

TCCCAGCGGTCCAGACGGAACGTGGTATCGCCGATAGAGCGCATGAAGGCCGTCAGCCCG

GCCGGGCCGCCCAACTCCTTCAGCAACAAATTGGCGGCGGCGTTATCACTGTATTGCACG

GCGGCCGCGGACAGCTCCGCCACCGTCATGCCTGTTGTCAGATATTTTTCCGAGATGGGT

GACCACGGAACCAGCGCATTTTTGCCGTAACGGATGGGTGTGTCCAGCAAGCCGGCCTGC

TGCTGGCTGCGAGCCAGCACAGCGGCAGCAAGAAAGCCCTTGAATGAGCTGCACAGTGGG

AAGCGCTCCTCAGCGCGGTAACTTACAGTTGCGCCTGAGCCGGTATCCATCGCGTACACA

CCGATGGAGCCGCCAAAGTCCTGTTCGAGTTTAGCGAATGGTTCCGCGACGAGGTTGGTC

AGCGCGGTGGCAGAAAAGCCAGCCAGCGGCCATGAGAGACAAGACAGCAGAACTAGACGG

CGATACAGTGACATCAACGATATTCCTTGTTTGAAGGTGGAGCTAGGTGTAGCGGCCGGA

TGTAATCAGGCCGCTACAGCTGGGATTAGGGGTCTGACGCTCAGTGGAACGAAAACTCAC

GTTAAGAAGTCATTTTTCAATATTATTGAAGCATTTATCAGGGTTATTGTCTCATGAGCG

GATACATATTTGAATGTATTTAGAAAAATAAACAAATAGGGGTTCCGCGCACATTTCCCC

GAAAAGTGCCACCTGACGTCTAAGAAACCATTATTATCATGACATTAACCTATAAAAATA

AGCGTATCACGAGGCCCTTTCGTCTTCAAGAATTTTATAAACCGTGGAGCGGGCAATACT

GAGCTGATGAGCAATTTCCGTTGCACCAGTGCCCTTCTGATGAAGCGTCAGCACGACGTT

CCTGTCCACGGTACGCCTGCGGCCAAATTTGATTCCTTTCAGCTTTGCTTCCTGTCGGCC

CTCATTCGTGCGCTCTAGGATCCTCCGGCGTTCAGCCTGTGCCACAGCCGACAGGATGGT

GACCACCATTTGCCCCATATCACCGTCGGTACTGATCCCGTCATCAATGAACCGGACTGC

CACGCCCTGAGCGTCAAATTCCTTTATCAGTTGGATCATATCGGCAGTGTCGCGGCCAAG

ACGGTCGAGCTTCTTAACCAGAATGACATCACCTTCCTCCACCTTCATCCTCAGCAAATC

CAGCCCTTCCCGATCTGTTGAACTGCCGGATGCCTTATCGGTAAATATACGGTTTGCTTT

CACACCTGCGTCTTTGAGTGCTCTGACCTGAAGATCAAGAGACTGCTGACTGGTTGAGAC

CCGAGCGTAACCAAAAAGTCGCATAAAAATGTACCTTAAATCGAATATCGGACAACTCAT

GTCTATTATTACAAATTTACGATTTAATAGACATATTAATGTAACAGTTTTACGATGTCC

GATAATTTATAACATTTCGTACGGTTGGAAAAATGTTACTAAATGCCCGTCAGGCAGGGA

GGCCGATATGCCCGTTGACTTTCTGACCACTGAGCAGACTGAAAGCTATGGCAGATTCAC

CGGTGAACCGGATGAGCTTCAGCTGGCACGATATTTGGCACTGTTGCAAATAGTCGGTGG

TGATAAACTTATCATCCCCTTTTGCTGATGGAGCTGCACATGAACCCATTCAAAGGCCGG

CATTTTCAGCGTGACATCATTCTGTGGGCCGTACGCTGGTACTGCGGCACTGTTGCAAAT

AGTCGGTGGTGATAAACTTATCATCCCCTTTTGCTGATGGAGCTGCACATGAACCCATTC

AAAGGCCG

>NODE_7_length_47400_cov_32.307743

CTGCATGCAGTGAATACGCAGCATGGTCTCCAGCGGATAGGGCCGTCGGCCATTGCCCGC

CTTGGGATAAAACGGCTCGATGACTTCCACCATGTTTTGCCATGGCAGAATCTGCTCCAT

GCGGGAGAGGAAAATCTCTTTTCGGGTCTGACGGCGCTTAGTGCTGAATTCACTATCGGC

GAAGGTGAGTTGATGGCTCATGATGTCCCTCTGGGATGCGCTCCGGATGAATATGATGAT

CTCATATCAGGAACTTGTTCGCACCTTCCTTAGCCTTTGTAAACGGATGCCGCAAACTGC

GGTGAAGGTACTCTTCTTAATACCTACGCCTTTTCAGGCTCATTCCTGCACTGAACGTCG

CTTACGCAATGAATAAGCGTGGTTAGTGCATTCTACTCACCCAATGGGAACATTTTCCCG

TTGGGGACGTGTTCCCTTTTTACTGTAAGGAACACAGATGAACACCTATGAAATGTTATC

CATCTCGATTACGTCTCCCGCCTGGGAAGCTGCGGTCGACTTTTCCAGCTCTGTTGAAAG

CGCTATCGCCAGCCAAAACCGGTTGGTTAAGGAAGCGCTGAACGTCTGGGAGCATCGGCA

GAACAGTGAAACGGGGCAGGTGACGTTCCAGCTGATCGTTTTTACTCGTACTGGGGGAAG

CGTCACTGCACACATCGAGAAATTTACGGTTAAGCGCGTTGGCTGCTGCCTTATGGTGTC

ATTAGCCACCGCCTGACACTAACTCTTTTCATCATCCCGGAGGGAAAACACCCTCCAGGC

GTGTTCTCCCTCCGCTTTATTCAGGGAGATACCCATCAATGACAGATTTCACTATCACAC

AGGTCGATTTTGATCGCCTGCTCGATCAGAACGATGAAGAACAGGCGGTACGTCTGTTTT

GTTTTGAACAATTACTTTACCGCTGGGCAGACCGGCTAAGCTGCGAGTATCAGGGCGGGC

TTTGGCTGGGGATGAAGTTATCCAACGGCGGCTTTTATGCTTATCCGGCCACGTCTCAGA

ACTGGAGCATATCGGCGGAAAATTACTATCAGGGCACGATGGACTCCGACACGTTTGGTA

TTACGGCTTCGCTTTACGCTCTCTGCGAGCTGGCGAACCGTACTGAAGCCGATGAGGACA

TCGAAACCTATTATGCGTTGCGCAATTACGCCTTAATGCATTCATGTACTAACGCCATTA

TGGCGGCCATTGACTAAAGGTTATTACTGACCGTTAACGTAATAAACGCTGCCCGAAAGG

AACCACTCCTTCGGGGGCGTTCTCCTTTCGGTATGACATCGCAAGGAGAACACCATGATC

GCGTTATCGTTTGAGCCACAGCCTGTTGTTCAGGATCTTTATGACTTAGCCAATGCAGAG

GGGGAGCTGTTATCCGTTGCCGCCAAAATGCGTTTAGGAATTGATGAGGAACGCGATGAG

GACGGTTTTACCGATAACGAATATGTCCTTACCGACATTGCTTATCAGCTGGCGCAGGCT

TTAGTTTTTGGCCGTTTTACTCATTCAGCCAGTGAACCGTTATTACATGACGTTCTGGCG

CTTGGAGAGAAGGTGAACAGGGAAGCCTGGGCTCATTATTTCTATACCGGGAACGCAGAT

GCAAAGTGCTCTCTGGCACTGGAAGCGATAGGATATTTATAGCCTTCGCATAATCCGTTT

CACTTCTTTTTACTGAACTTACTTCCCCGGAGGGAGCTTCTCTCCCCGGGGAAGCTGTCT

CCGGCAATTATTGAGGAGATATCTATGCTGCGTTTTTATGGTTCTGACCTGAAGGCCATC

GTGACGGAATCTATAACGACCGATAAATCTGTCGTTCTGGCTAAGGATCACGGCGTTTAT

TTGATGGTTGACGGCGGTGAACAACGCGATGATGGCCGGGTAAGGCATTTGGCCTATGCT

GACGGCTGCCATCCCGATCTTGACCCGGAATGGGTCTCGATGGCCCGCATACTGGTCGGC

GGCGATAGCTTTGAAGAAAGGATACCGCTGACGGAAGGCGGGATCGTGGACATCATCACC

AAACCCTACCAGCTGTCCATTATGCTGAAGGCGCAGAGGCTGGCGATGTTCATTACCGGC

TGGCAAAACTGTGTACCCGTCGCGGAGTACCGTCATCTGACGGACAGAATAAACGTTATG

GCTCAGGCACACTTCACTGCCTGCCGAAGCCAGAAAGAGCTGAAAAGCTGGCGCATGATG

GCGCAGCGGCTGCTTGTTGACGTTGCCGTTGTTGGCTGCAAACGGGCAAAAGCTGATGAC

CATCACTGTTTTCTTATCGCATGCAGGCAACTGCAAAAGCAGTTCGAGCGGGTAACGACC

GAAGGCGTTATTCAGGCCGTCGCCATTTGAACTGACTGACATTCATCAATCCCTGTGGGG

CGTATTTCTGCGCCCATAGGGAGTGGGATACGCCTTTTTAAAAGGAGTTTCCCATGAAGA

AATCGACCTCTCGTTCTCAACGCGTTGAGCGTACAGACCTGTACCAACAGGTGACCGATC

GCATTGTTGCCGCGCTGGAAAAAGGCGTACCGCCCTGGCGCAAGCCGTGGCGCTCGGTGG

AGAAATATGCCTCCAGCCCGTTTCCGGTTAATGCCGCGACGGGGGGGCACTACAACGGCG

TTAATATCATGCTGTTGTGGCTGGCAGCGGAAGAGAAGGGCTACCGTTCCAATCGCTGGC

TCACCTATAAGCAGGCGCAGGCAGTCGGTGGGCAGGTTCGTAAAGGTGAAAGCAGCAGTC

TCGGCGTTATCTTCAAACCGTTTGAAAAGCAGGCGGAAGATAAAAGCGGCAGTAAGCTGT

TTGACGCCGATGGCAAACCGGTTATGGAATCCCGGGTTATGGCTAAATCGCTGTACCTGT

TCAACGTTGAACAGTGCGATAGTTTACCAGAATCCGTCGTTGGGGTGACTGCCGTTCCTT

TGTCGCAGGAGGATGTGGATACCGTCAGTACGCCGGTGTTTAATCGCATTCTTGATATGC

TGAATGCCTCCGGCGTAAAGGCTACATCGTTTAGCCAGAACCGGGCATTTTACCGTCCAT

CCACCGATGAGATTGTATTACCAGCAGTCGGTCAGTTTTTTTCTGATGCTGATTATTGGG

CGACATTGTTGCATGAGCTGGTTCACGCCAGCGGCCATGCCAAACGGCTAAACCGCGAGG

GCATCACGTCTTCATTGAGTCGGTTTGGCGATCCGATTTATGCGTTTGAAGAGCTTATCG

CAGAGCTGGGTAGCGCTTTTCTCTGTGCCGAACTGGGCGTTTATGGTGAGGTGCAACATG

AAAGCTACTTTGCCTCATGGCTGAAGACGCTGAAAGAGGACAAACACGCTATTTTCCGGG

CCAGCCGTCAGGCGCGCGAGGCCTGTGAATTTTTACTTAACCTTGCTCAGGATGTGCGCC

GTTCAGTGGCCTGATGCGCTAAATGCTCCTTCGGGAGCATTTTTTATGGGATTTGGAAAT

TATTAGGAACCTAAACAGAGTTGTTTGTTGTTGTTTATGGGCGGAGAAATAGAGTGGCAG

CTTTTCATTTCAGCCATCGGCGGTATTTATGCTCAATACTCTATTTTTCTGGCGTGACAA

GGCGCATCCGCCGGAACCCTTATCCGATAACCGTTCACCTGTGCCTGCGGGTTATTTTGC

TCCGGCCAGCGTAGAGGAGTTGTTGGGCACACCTCTACGTCAGCAATATCTGCAAACGCT

GTGGGATTACTCTTCTCTGCCCAGAAACCTGTATCAGCAGTATTACCTGACTCCTCTGGA

GCAGTGTGTACTACTAATGCAGCAGTTTCCGGTAGCGGAGCAGGGGGCGTATGCGTACCC

CGGTGGGATGGTCGATTGTTTTCTTAAAACGCTGGCAAACGCGGTGAAACTGTCAAAAAG

CTACATGTTGCCGCCGGGTGCTGACCCTGAAGATCAGGCGACGCAGGGGGCTGCGTGGTC

TGCGGTTATTGTCTGGGCGACCATGTTTAGCGTGTTGGACAATTTGGCGCATCTCCACGT

TGAACAGGAGAACGGGCAGGTCTGGTCGCCGGTTGCAGGCGTTCTGGATAAACCCTACCG

CTTCCGCTTTGTGCCAGAAACTCAGCCGGAAAAGGTATATGGCCACAGCGCCATGCTGGC

TTTCAGGCTGCTGCCGGAAGAGGGGCTGCGTTGGCTGATTCGATGGCCCGACGCGTTAAA

GGCGCTTTCGATGTTTCTTGCCGGGTATCGGGCGCAATCAGGCGTAGTAGGGGCAATAGT

TTTACAAGCCGGGGAGGGCAGCGATAAAACGCCGCCAGTCACACCATCCGCGTTGCCAGA

AGCTTGTCCTGATTCAGCTTTTGACGATTACGCCACTTTCTTACAACAGGCACCGCCGCC

CTGTGAATATGTTGAAAATATTCCCGATGATTTACCGTCTTTTATGGAGAATGTGGAAGG

AGCCGATCTTTCTTCTGAACCGGCATTGTGCCGCTTTCATCCTGCTGGTGAGTTGTTTAT

TGACTGGCTCAGACAATCTATACAGCAGAAAAAAACGATAGCCAATGAGCCGGATGGTCA

CGTATATGTGATCGCGGGGGCTGTATTCCTGAAAACTCCGTCAATTTTTCATAGGTTTAT

GGCGGAACAGAGGGAGGCACTGCGACCATTAAAAATAGACAACTGGCGTGATGTTCAGCG

CCAGTTTGAAAAAATAAATCTGCACAGGCGGCAGCGCGGGGGAGCAAATGTATACCAGTG

CCGTAATAGGGAGAGCCAGAAGGTTTATCACGGCTATCTTGTACCTGCGAAAGAAATTTA

TGGCGCAGCAACAGTGCCAGCAGATACCCCGTTATTAGAAGTTAGCTCTTTGAACTAATG

GGACGAAATTGACTATGGATGAATTGTTAACATTTGAAGTTCTTCTGGAGAAGTATTTTT

ACGCTAAAACATTACGGCCTGACACGCAGTGGAGTTATTGCAAGGTAGTAAGAACGTTTA

CGAAGTTTGCGAAAGTATTACCTGGGGAGGTCAGTGCCGATTTGGTGCTGAGGTGGAAAG

AAGAAGTATTAAAAGTGCAGGGGCTGAAGGTTCGTACCTGGAATAACAAGGTTGCCCATA

TGCGTGCGTTGTTCAACTTTGCTATCAAGAAAAAACTATTCCAGGAAGAGAACCCGTTTA

ATGGCGTTGTGGCTTGCCCGGGCGTTAAACGTAAAAAAACACTTTCTGACAGTCAGCTTG

AAACGGTCTATCGGGTTATGCAGCAGCAGAGGGGAAGGGAGCAATCCGGCGATCGTTATC

GTAATGCATTGGCTCCAGCATGGTTCTGGACTGCCGTGCTGGATATCTTGCGCTATACGG

CCATACGCCAGAATCAGTTCTTACATATCAGAATTAGCGATGTCGATTTTGATTCGCACT

GCATTCACTTACGGCTTGAGGGGGCTAAAAATCACCGTGAACATCAGGTGCCGATTATCT

CCGCCCTGCGTCCATCGCTTGAGGAGTTGGTCAGTCAGGTGACAAAAGCGGGGGCAATGC

CACATGAGCAGCTATTTAACATCGCCTGGTTTGATTTCAGGAGAAAGGCAAATTATCAGG

ATGGTATGACGAAAGTTCCTCTACGGTCCTTTTTCCGTCGGTTGTCCCGGGAGTGTGGTT

TTCTGGTTAGCCCTCATCGTTTCCGTCATACCATCGCGACAAAGCTGATGCGTACGCCGG

AACGTAATCTGCAAACGGTGAAAACCTTGCTGGGGCACGTTAGTCTGGCGTCAACGCTGG

AATATGTGGAGGTGAATATCGAAAGCCTGAAGGCGACGCTGGAGCAGGAGTTAAGATGGT

GAAAAATGGCGCATATTGACAGTTTCACTAAAAACTGTAACATCGCCTAAAGCGAAAAAC

CCTATTCAGGTGGGCTGAATAGGGTTTCGCACAGAGTGGAACAATCAAGTTCAACAGGTG

ATGACATTCATCGCTGTCTAAACTCTGTCCTCACATCTGATTTCGCCCCGCTATTTCATG

CCTTGTACACATGAAGCTAGCCGAACGGTACTGTGTAAGTGGTGCCCGGACTCGGAATCG

AACCAAGGACACGGGGATTTTCAATCCCCTGCTCTACCGACTGAGCTATCCGGGCAACGG

GGCGCATTAAACCGTAATCCGCCCACCCCGTCAACCAAATTTCTTAAATTACTTATCGAT

TGCTTATCTTTGCGGCAATTCTGCGTTCAAAGGCGCGTTTTGGCTTAACTTCACTGCATG

CCGTTATCGCCCTCGCGGCTTTTCCAGCCGCTGGTAATGGCGATAACGTGGCGTAGTCCG

GAGATGAGATAATCGCCAATGACCTCCTCGTCCTCACGCGGCGAGCTCAGGGTAATTTCC

GCATCCACGCCGTGGCGATAGGCGCCATGATGGCTGAAAATGGTGCCGATATAACACTTC

CCGTTCAGCCAGACCGGAATATAGGCCACCGTCTCATAGATATAGTTAACGGCGACGCCG

CTGTAGTAGTTATCCGCCTCGTCAGCGGAGGTGCCCGGCGGGATGGGGCAGATCGGCGCG

TCGTTGTCGCTGGCGGGTCTGTCTTTCAGCAGGCTGCCCTGCATTACCTCCAGCGAGCGC

AGCAGGTCCGCTTTATCGCCGTCGCTCAGGCTGGGGGTCAGCGGCTGGTCTTTCTCCGGG

GAGCGGATGCTGTTCAGCGTATAGCGATAGCGAACCGTCACCGCGGGCGTCTGGCTGGTG

GTGCTGAACGGGCGTAGCAGGTAGAGGTTATCTTCGCCAAACTGGCCGTTGTACCACAGG

GCATACACCTGGCCGTTGATTTTGACCCAGTGGTTCCACTGGTTAGCCCCGCGGCCATTA

ATGGAAAAGAGGGCGCCGGGCACCCCGGCATCGAAATCATCACCATTATCACTGTCGCTG

CCGTTGACGGCGGCAAAATCATCATCACCTCGCTTGAGCACCCCGGTGTAGCTGAAGAGC

CCGGTGCCGCCCACATAGCTGTCGATAATCAGGTCGCGTTTGCCGTCGCCGTCGAGGTCG

ATAAGGGTAAAGCTGACTTTGCCGTTTTCTGAATCCGCGCTAATCGAGGAGCGCAGAAAC

GCCTGCCACTCATCATCGCTGATATCCGGGGACGGTTTACTGGTCGTGATCAGCGTATCG

TCGGCGTAAGTGAGCGTGAAGTCGGTAATATGGCCGGTTAACGGAAACTGCTCGGCGACC

TTATTCAGAGACAATTCTGGATCGCTTTTTTGCGCTTTCAACACTGCGTTATACAACGTG

CGCAGAGCCAGGTTATCCGCCTCTTTCTGCTGCCTGGGGATCACCTGGCTGACAAAGGTC

GGCAGCATCCAAGTGCCACCCGGGGTAATTTCCCGACACATACCGGTGCTGTACTTCAGG

CTGGGGGTAAAGGTTTTACCATCCCAAACGCGCGTCTCGCCGGTGACGCAGTCGGCCATG

CCCCGTTCTTTGTGCAAAAAGACGATAGCGCCGTCGGCGTAGCTGGAGGCCTCGGTAGTG

AGCAGCCGCGGTTTGCTCAACTGGGCGTTATCGACCAGCCACAGGGCATAACCGTCGTTA

TAGGGCGCTCGCCAGCAGAGCGCCTGCGCCAGAGAATGGGTTTTATCCAGCGCGGTCAGC

GTGATCTGGCGATCTGCCGCCGGAATGGCCTGATTCTGCCAGTCGTCGCAGCGCTGGTTC

AGCAGCGGCGTCAGGATGGGCAGCAGTTTCTGGCGCTGAAGCATACTCAACGGCACTGGC

TGCGCGTTATGGAGAACCGGGGCGGCGATAATTTCCGGGGCGGGAGTGGCTGGCAAAATG

GCATCGTCGCCGGCATCGCCTTTATCCAGCAGCGCATCGGCGGTGCCGGTGCGTCGCTGA

AACGCATCCATTTTACCCAGCACCTCGCGGCTGCCGGCGCTGGAAAGCGGCAGGTGCTGG

CCGTTAAGGGTGAATTCGATTTTGCGCTGATTCGTTAACGCCTGTAGCAGGGCGGTGGTC

TGATCGCTGTCGAGGCGAAAGTGGCTGTCGTCGAGAGCGTCCAGCGCGCCAAAATCCCGG

TCGTCGATCAGCAGGCTGGCGGTGGAGTCGGCGGGGATATCGTGCTCGATTTGCGCAAAG

GTTACCGTGGCGGTGAGGTGCTGTTCGCTGCCCGCGTTGCGGGTCAACAGCACGCTGACC

TCACCCATGCGGACGCCGTAACCCGCCGCCCGGCAGGCGCCGGTATTATCGCAGGCGAGC

TCCCAGTCTTTTTGTGCAAAGGAAAAACCTTGCAGGGGAGCCGCCAGCAGGGGCGTAGAG

CAGAGGCCCAGCCAGGCAGCCCAGAAGAACGCGCGCATATCAATCCCTGTCAGCAATCAG

TGAGGGGGAAATTATAGGCGCGACGTGGCGGTTAGGATATCAGAATCAGGTCAAGGCGCC

GCCCATACGGCACTGGGCGAAGCGTAGAATATCTTCAGCCAGCCGCCGGGCGGTATCCAC

ATCCGTCTGGCTACGTTTGACCAGCAGACGGCTCAGACAGCCCTCGACAATCAGCTCCAT

CTGCTTGGCGACCATTTCCGGGTCATCCACCTCCAGCTGAGTCAGCAGCTCGTGAGTGTA

GGCCAGCGAAGCCTGCTTCTGCTGTTCCGCCAGCTGGTGAATGGGGTGCTGAGGATCCGG

GTAGAAGGTGCAGGCGGCGATAAACAGGCAGCCCGGGTACCGCTGGTTGCTTACGCAGGT

GGTGAGTGCGGCATAGCGTGCCAGCAGCTTTTGCTCTGCGCTTAAGGTCTCGTCCAGCAG

GAGCTGACGACGCCAGGCATCCACCTGCTGGCTCAGATAGCGAAGCGCGTCGTACAGCAG

CGCTTCGCGGTCAGGCCAGAAGCGTTTCAGGTCGCTCGTCGGGCAGGACACGCGCTCAGC

GACCATCTCCAGCGACGTGTTGGCGATACCTTCAATTTCAAGAATCTTAATGGCTTCTGC

CAGGACGTCTTCACGTAGCACGGTGTTCTCCTCCATCTTTCCTCCTAAAGTGTCGCTCAC

GCTTGCCAATCGCGCAAATGGGCGCTGAATGCCGCGGCATCCATAAAGCCGGTGACTCGC

CGCTCAGGCTGTTCCTGACCCTCAGCGTTGAAGAACAGGATCGTCGGCAGACCCAGCACC

TGCAGGTGTCTCAGCAGCGCGACGTCTTGCGGGCTGTTCTTCGTCACATCAACCTGTAAT

AACACGGTGCCTTTCAGCGCCTGCTGCACGTCAGGTGAACTAAAGGTGTATTTTTCAAAC

TCTTTGCAGGCCACGCACCAGTCGGCGTAGAGATCGAGCATCACCGGTTGACCTTTCGCC

TGCGCCAGCGCCTGGTCAAGCTCGGCCACCGAGCTGACGCGGGTGAAGGCCAGGTGCGCC

TGCTGCTCGACCGCCGGGGCGCCAAACGCCCAGTCCTGCAGAGGCCGCGCGCTGACCAGC

GCGGCGGCAAGCAGAATGATCTGTACCAGCCGCATCCACGGCCGGGTAGCGCCCAGCGAG

GTGATAAACGCCCAGCTGAAGAAGGCGACACCGAGCATTGACCACAGCCGTAACCCCCAC

TGGTCGCCGAATATGCGTTCCAGCAGGAAGACGGGCAGGGCAAGGATCACAAACCCGAAG

GCGGTTTTCACATGGCTCATCCACGGGCCGCTTTTCGGCAGCAGGCGATTGCCAAACACG

GTCACAAGGATCAACGGCAGACCCATGCCCAGCGCGTAAAGGTACAGCGTGCCGCCGCCC

AGCCACAGATTACCGCTCTGGGCGATATACAACAGAATGGCGCTTAGCGGCGCGGTAGTG

CAGGGGGAGCAGATCAGCCCGGCAATAGCGCCCATCGCAAAGACCCCGCCGGGCGAGCCG

CCCTGGCGCTTATTGCTGAGCAGCGTCAGCCGGGTCTGCAGCGACGACGGCAGCTGCAGC

GTGAACAGGCCGAACATGGAGAGCGCCAGCAGTATAAACACCGCCGACAGGCCGACCAGG

ACATATGGGTGCTGCAGGGCCGCCTGGAACTGCAGCCCGGCGGCGGCTACCACCAACCCC

AGCGCGGTATAGGTCAGGGCCATCCCCTGGACGTAAATAAAGGCCAGCAGCAGGGCGCGC

GCGGTGGAAAGCCGCTGTTTTCCGCCCAGCACGATGCCCGAAATCAGCGGGTACATCGGC

AGCACGCAGGGGGTGAAGGCGATACCAATGCCAATCAGCAGCGCCCACAGGGCGGTGAAG

GGCAGACGAGCGGGGACGTCTGCTGGCGGCGCCATGGCAGGCGCCTGCGGCACGGCGTTC

TCCTCCATCGGGCGCGGTTCAACCGGCAGCGGCGGATTGAAGGCCGGACGATGGTTCAGC

GACGACACGGGCGCGGCGGCGGTTGGCTGAGCGTCGTTTGAGGCCGCCCGCACGGCGCTC

AGCGGGATCACTTTAGTCTCCGGCGGATAACAGAATCCGGCATCGGCGCAGCCCTGCCAG

GTGACGGTGAGAGTAGCCTCTTTGTCCGCCTCCTTCACCGTCACCGGCACGGTCAGGCGT

TGGCGAAAGATCTCGCTTTTGCCGTAAAACTCATCTTCATGCCACTCTCCCGCCGGCAGC

GCCGGTTCGTCGATCGTCGCCCCGGCGGCGCTGAAGGTAAACTGTTGACGATAAAGATAA

TAACCATCCTTGATTTGCCAGCTCAGGTTGACGTCATGCTGTTGCTGCTGAAAGTCAAAG

GCGAAAGCTTGATCAGCAGGCACGAAGTTCGAGCGCCCCGGCGCGTCGAATAACCCGGCG

GTGGCTGATGTGCTGCACAGCAGCAGGATCAGCGTAATGATGCGGTAAGCCATGAGAGGT

AATCGTTGTCTCCATGCGTGACGGGTAGAACCAGCAGTTCTGGGGTTTGATACGGGTGGT

GTGACTTCAGGCAGTCCAGCAGCGCCTGCTGATGGGCAAGGTCAGTTTTGAGTAGCATCT

GCACTTCATACTCCTGCTCGAGTTTCCCTTCCCAGTAATACAGAGAGGTAGCCCCCGGCA

GCAGCGTGGCGCAGGCTGCCACCTTTTCCGCCAGCGCTTTTGCCGCCAGATCCTGGGCGG

TCGCTTCGTCCGGCGCGGTACAGAGCACAACAACAGCATCAGGCGTAGTCATCATGAACC

TCGTATCAGCGAAAAGAGGCACTATAACACGCAAGATGCGGGGATATTAACGTAACGAGC

GGGGAAAGTGAGGGCAACGGAAGGCGGGCCCGTAGTGGGCCCGCCGCCAGCGGTATTTAC

AGCATAATCCCGCCAAAGATAAAGCCGAGGATCACGCACAGCGTGATAGCGATAACGCCG

GGGATCAGGAAGGCGTGGTTAAAGACATATTTACCAATGCGGGTTGAGCCGGTGTCGTCC

ATCTCTACCGCCGCCAGCAGGGTTGGGTAGGTCGGCAGAACGAACAGCGCCGAGACCGCG

GCAAACGAGGCGATAGCCGTCAGCGGGCTGACGCCCAGCAGCAGCGCGGCAGGCATCAAC

GCCTTGGTGGTGGCTGCCTGCGAGTAGAGCAGCGTGGCGGCGAAAAACAGTACCACCGCC

AGCAGCCATGGGTAATTGTGCAGCAGATCGCCGGCCACGGCCTGGATGTCGCTGATATGC

GCTTTAACGAAGGTATCTCCCAGCCAGGCGACGCCGAGGACGCAGACGCAGGCGCTCATC

CCGGACTTAAAGGTGCTGGCGTTGAGCACTTCGCCGGTGTCGATTTTACAGGTGATGCTA

ATCAGGGTGGCGATGGTCAGCATAAATACCACGATCGCCTCGTTACGCGGCAGCACCGGG

TTCTTAATCAGGCCGACGGTATCGCTGATGGCCGTGGCGTAGAACATCACCGCCACGATG

CCGATCAAAAACAGCAGAACGGAACGTTTGGCGTGCGGCTGCAGCTCAAATACCTGGCTG

CCGCGCAGTCTGACTTCCCCCTTGGCCAGCCGCTCCTGGTAAACCGGATCGTCTTTCAGT

TCGCAGCCGAGGAAGTTGCAGACGATAGCGGTGAGCATCACCGCCAGCAGCGTGACCGGA

ATACAGATGGCCAGCAGCGTCAAATAGCTAACGCCCAGCGGTTCAAGGATACCAGCGAAA

AAGACCACTGCGGCGGAAATGGGCGAGGCGGTGATCGCTATCTGGGAGGCCACCACCGCA

ATCGACAGTGGACGAGACGGACGAATGCCTTGCTCTTTGGCAACTTCGGTGATCACCGGC

AGCGTGGAGAAGGCGGTATGGCCGGTGCCAGCGAGCACGGTCATAAACCAGGTCACCAGC

GGGGCAAGGAAGGTAATGTACTTCGGGTGGCGGCGCAGCATCCGTTCGGCGAGGCTGACC

AGGTAATCCATCCCGCCGGCGACCTGCATGGCGGCGATAGCGGCAATCACCGCCATAATG

ATTTCAATAACGTCGAAGGGGATCGCACCCGGTTTAATTTGAAAAATAAGCGTCAGGACA

AGGACGCCAAGGCCACCGGCAAAGCCGATACCGATGCCGCCGAGCCGGGCGCCGAGATAA

ATCGCCAGCAGGACAATAACCAGTTCTGCACCAAACATATATGCCTTCCTTGTTTTTTAA

CAAGTTGATATTGAATTGTTGTATTTTAGTAAAACCAAAAAGCAAAAAAGGCATGTCATC

GCTGACATGCCTTTGAATGACTAACCTGAAAGATTACTGTTCGCTTTCATCGGTATAACG

CTTTGCTTTATAAGCGGGATGCATCAGGTTTTGCGCAGAGAAAATATCATCCAACTCCGC

CGCCGTCAGCAGTCCGCGCTCCAGCACCACTTCCCGTACGCTCTTGCCGGTTTCGGCACA

GATCTTGCCGACGATATCGCCATTGTGGTGGCCGATAAACGGGTTGAGGTAGGTGACGAT

GCCGATGGAGTTGTAGACGTAGCCTTCACATACCGCTTTATTGGCGGTGATGCCGTTAAC

GCATTTCTCCAGCAGGTTGTAGCAGGCGTTGGTCAGGATATGAATCGACTCGAACATCGC

CTGGCCGATTACCGGCTCCATCACGTTCAACTGCAGCTGACCGGCTTCGGAGGCCATGGT

CACAGTGGTATCGTTGCCGATAACTTTGAAGCAGACCTGGTTGACCACCTCCGGCACCAC

CGGGTTAACCTTCGCCGGCATGATTGAAGAGCCAGCCTGCAGCTCAGGCAGGTTGATTTC

GTTGAGGCCCGCGCGCGGACCGGAAGAGAGCAGGCGCAGGTCGTTACAGATCTTGGAAAG

TTTCACCGCCAGGCGTTTCAGCGAGCTGTGAACCATAACGTACGCTCCGCAGTCCGAGGT

GGCTTCAATCAGATCTTCCGCCGGGACGACCGGTAAGTTGCTTACTTCAGCCAGCTTCTG

CACCGCCAGCTGTTGATAGCCGTCCGGGGTGTTGAGGCGAGTACCAATGGCGGTGGCGCC

GAGGTTCACCTCCAGCAGCAGCTCCGCAGTGCGCAGAATGCTTTTGGTCTCTTCATTAAG

CAGCACATTGAAGGCATGGAACTCCTGGCCGAGGGTCATCGGCACCGCGTCCTGCAGCTG

GGTGCGGCCCATTTTGAGGATGTCCTGGAACTCCACGGCTTTCGCCTGGAAGCCTTCGCC

CAGCTGTTTAATCGCATCGATTAACTTAAGGATGGAGGCATACACCGCAATGCGGAACCC

GGTGGGGTAAGCATCGTTGGTGGACTGGCATTTGTTGACGTGATCGTTTGGGTTCAGGTA

CTGGTATTCGCCTTTCTGGTGGCCCATCAGCTCAAGGCCAATGTTCGCCAGGACTTCGTT

GGTGTTCATGTTTACGGAGGTACCGGCCCCGCCCTGGAAGACATCGACCGGGAACTGGTC

CATGCATTTGCCGTTATTCAGGACTTCGTCACAGGCGGCGATAATCGCATTTGCCGCGCT

TTTGGGAATGGTCTGCAGCTCCTTGTTCGCCAGCGCGGCGGCTTTCTTAACCATGACCAT

GCCGCGCACGAATTCTGGTATGTCGCTGATTTTGCTGTTGCTAATGTAGAAGTTTTCAAT

CGCTCGCAGAGTATGAACGCCGTAGTAAGCGTCCGCGGGAACTTCCCTGGTGCCCAACAG

ATCTTCTTCGATACGAATGTTGTTTAACATGTGAACCTTCTTTTCAAGCTGCCAATGAAT

TCACCAAACACACAGAATATCCAGTATTCAGTATATTTTCTGGCCGACGATTATTTCCTT

AACCGGCCCGGTGCCCAAGATCATATGCTGATGATAGCGAATATCAGTAAGCTTGATCAC

TTATTACATTGCGGGTATGAGAAGATTTATTAATCTGTGAAATGGGTCACCGCTTTCTTA

TTCCTGAGAAAAATAAGCCTTTCCGCTGATTGAAAAGCCGCTCAGCATCCCCATGTTAGT

GGGATGCGATCAGCAAATTGATGATTACGGGCGCTGAACGCAGCGCCCGTTGATGAAGGA

GACGCCGGTGCGTTGGATTCCGTTTATTGCCTTTTTTCTTTACGTTTACATTGAGATATC

GATCTTTATCCAGGTTGCGCACGTGCTGGGCGTCTTTATGACCCTGATCCTGGTGATCTT

TAGCTCGGTGGTAGGGATGTCGCTGGTGCGTAACCAGGGCTTCAAAAACTTCCTGCTGAT

GCAGCAGAAGATGGCCGCGGGCGAGAGCCCGGCGGCGGAGATGATCAAGAGCGTATCGCT

GATTATCGCTGGTCTGCTGCTGTTGCTCCCGGGGTTCTTTACCGACTTCCTCGGCCTGCT

GCTATTGCTGCCGCCGGTGCAAAAGCATTTGACGATGAAGCTGATGCCGCACCTGCGCTT

CAGCCGGATGCCGGGCGGTGGCTTTAGCGCCGGTACTGGCGGCGGAGAGACCTTCGAAGG

GGAATTCCAGCGCAAAGATGAGCAGCGCGACCGTCTGGACCATAAGGACGATCGCCGCGA

TTAACATCCCCCCGGCCCGGTCAGCAGATGCGACCGGGCCGCTTTCTTTGCAGGCCTACA

CGCTTCCCGTCGCCAGCTTGCGCCTGGGTAAAAACAGCCACAGCCCCGCCAGCATCACCA

GCGCGTACAGGCTTTTCCAGCCGACCATCGCCAGCAGCAGCAGACAGAGAATGCTGCCCA

CCACTGCCAATAGCCGATAGCGACCGCGCAGCAAACGACAACCCGCCAGCATGCACAGCA

GATAGATCATGATGAAAATGCCATTGGCGTAAACGATCAGCGCGTCCAGATTGATATCGA

GCAGATAGATGCCAAGTGTGCTAACTACGCAGGATCCCAGCACGGCGTTGAGGGCGTTGC

GCGGGATCTGCCGTGGCGACAGCCTTGCGAGGTAGCTGTGTGGCTTATGCTGCGCTTGCG

ACCAGACCAGGCGGGCAAAGCTTTGAATATAGATGTTGAGGCTGGCGAAACAGGCGAGAT

AGCCGATGACGCAGGCTACCCACAGCGCTTCGACGCCGAACAGACGGACCACGATATTCG

GTAATGACGCCGCCGCCGCCATCTCCTCGCCAAAGGCGTGGAAGTGCAGCACCAGCACGG

TGCAGGCCCAGTAGACCGAGCCGGCAAGCAGCAGGCCTATCATCAGCGCCCTGGGGAAAT

CACGCTCGGGATGTTTAAACTCCGAGGCGAGATGCGCGAAGGCTTCCAGACCGACAAAGC

ACCAGAACATCACCGACAGCGCCGAAAAGAGCTGCCCGCGGTCAATCTCCGCCGGGGCCG

GGAAGGGGATCTGCGCCGGGCTTATCCCGCCGCGCCACCAGACTACGACGATCAGCGCCA

CAATCAGTACGGCAACCAACGTCTGCAGGTTGGCGCTGGAGCTGGCGCCACGCGAACCGA

CCCACCAGACGATGGCCAGGGTGCCCAGCTCCGCCAGCAGCAGCTGCGCATCATGCCAGC

CGAACAGCGCCTGGCCAAAACCGGTGGCGATGTGCAGGGCGGCGGGGAGTCCGACCGGGA

TAACCGATAAAAACAGCCAGCCGGTGACGCTGGCCAGACGTGGCCCAAAGGCCATATCGA

CAAAGTGGGCCACGCCGCCCGCGCTGGGAAAATGGCGGCCCAGCAGGGCGAAGACGATGG

CAATCGGGAAAACAAGGAGAATGAGCAGCGGCCATGCCCACAGGCTGTTATCGCCAGCGA

CCAGCGCCGCCAGCGCCGGGACGGCGAAGACGCCGGTACCCAGCAATGAGGTGGAAAGCA

ACCCAACTCCCTGTCCCAGCCCTAACTCCTGTTTTAAACCACCCATGATTCAATCCTGCG

CCAGTGAAAAAAAAGAGAGTATCACAATCGCTTTTCCTTATGACCGATTGCCTGACATGG

CCGCTTTTTGTGCGCCAGCGCAAAGGTAAAAATTTTTTTTAATTTTGCCCTTGAAGCCGT

AAATGGCCATCCCCATCTCTCTCTGCACTAGCCGGTAAACCGCGTTCGGCCCGGCGTCAC

CCATAACTGATAATGACTTTCTCGAAGGAGAGCTATCAATGAGTATTCGTCCGTTACATG

ATCGTGTGATCGTCAAACGTAAAGAAGTTGAAACCAAATCTGCGGGCGGCATCGTTCTGA

CCGGTTCTGCAGCAGCTAAGTCAACTCGTGGCGAAATCATCGCTGTCGGTAAAGGCCGCA

TCCTGGAAAACGGGACCGTGCAGCCGCTGGACGTTAAAGTTGGTGACATCGTGATTTTCA

ACGATGGCTACGGCGTGAAGACTGAAAAGATCGACAACGAAGAAGTACTGATCATGTCCG

AAAGCGACATCCTGGCAATTGTTGAAGCTTAATTCGCACGACCCTGAACGAATTTGAGGA

ATAAAAGAAATGGCAGCAAAAGACGTAAAATTCGGTAACGACGCTCGTGTAAAAATGCTG

CGCGGCGTAAACGTACTGGCAGATGCAGTTAAAGTGACCCTGGGCCCGAAAGGCCGTAAC

GTGGTTCTGGACAAATCCTTCGGCGCGCCGACCATCACCAAAGATGGTGTTTCCGTTGCA

CGTGAAATCGAACTGGAAGACAAGTTCGAAAACATGGGCGCGCAGATGGTGAAAGAAGTT

GCCTCTAAAGCGAACGACGCAGCAGGCGACGGCACCACCACCGCAACCGTACTGGCTCAG

GCTATCGTGAACGAAGGTCTGAAAGCTGTTGCTGCAGGCATGAACCCGATGGATCTGAAA

CGCGGTATCGACAAAGCGGTACTGGCTGCAGTAGAAGAGCTGAAAGCGCTGTCCGTTCCG

TGCTCTGACTCCAAAGCTATCGCTCAGGTAGGTACCATCTCCGCTAACTCCGACGAAACC

GTTGGTAAACTGATCGCGGAAGCGATGGATAAAGTTGGTAAAGAAGGCGTGATCACCGTT

GAAGACGGTACCGGTCTGGAAGACGAACTGGACGTAGTTGAAGGTATGCAGTTCGACCGC

GGCTACCTGTCTCCGTACTTCATCAACAAGCCGGACACCGGTGCCGTTGAGCTGGAAAGC

CCGTTCATCCTGCTGGCTGACAAAAAAATCTCCAACATCCGCGAAATGCTGCCGGTTCTG

GAAGCCGTAGCGAAAGCTGGCAAACCGCTGGTCATCATCGCTGAAGACGTTGAAGGCGAA

GCGCTGGCGACCCTGGTGGTTAACACCATGCGCGGCATCGTTAAAGTGGCTGCGGTGAAA

GCACCGGGCTTCGGCGACCGTCGTAAAGCTATGCTGCAGGACATCGCTACTCTGACTGGC

GGTACCGTTATCTCTGAAGAGATCGGTATGGAGCTGGAAAAAGCGACTCTGGAAGACCTG

GGCCAGGCGAAACGCGTGGTTATCAACAAAGACACCACCACCATCATCGATGGCGTTGGC

GAAGAATCCGCAATCCAGGGCCGCGTAGCTCAGATCCGTAAGCAGATCGAAGAAGCGACC

TCCGACTACGATCGTGAAAAACTGCAGGAACGTGTCGCTAAACTGGCTGGCGGCGTAGCA

GTAATCAAAGTCGGTGCGGCTACCGAAGTTGAAATGAAAGAGAAAAAAGCACGCGTCGAC

GACGCCCTGCACGCAACCCGTGCTGCGGTTGAAGAAGGCGTGGTGGCTGGCGGCGGCGTA

GCGCTGGTTCGCGTTGCGGCGAAACTCGCTGGCCTGACCGGTCAGAACGAAGATCAGAAC

GTCGGTATCAAAGTTGCGCTGCGCGCAATGGAAGCGCCGCTGCGTCAGATCGTGTCCAAC

GCCGGTGAAGAGCCGTCTGTTGTGGCAAACAACGTGAAAGCTGGCGACGGTAACTACGGT

TACAACGCAGCAACTGAAGAATACGGCAACATGATCGACTTCGGTATCCTGGACCCAACC

AAAGTCACCCGTTCTGCACTGCAGTACGCGGCTTCCGTGGCTGGCCTGATGATTACCACC

GAGTGCATGGTGACCGACCTGCCGAAAGGCGACGCGCCTGACTTAGGTGCTGCTGGCGGT

ATGGGCGGCATGGGCGGTATGGGCGGCATGATGTAATCGTGCGCTCTACGGCATAAAAAA

GCAGAAACCCCTGGCCAGCAATGGCTGGGGGTTTTTCTTTTGGCGCGCTTTTTAGTATAA

GGCTTATACATAAAAATCATTTAAGCTGCATCAGAGCGGCAAGCACCTCTGTTTCGGGCG

TGAACTGACAAGCGCGACCGGGGAGGAAATGAACGCGGCTCATGCCGACGCAGTTTGAAG

GATGACAGATTTACATCCGGGCCAGTGCGTCCAGCTCATCGATCATGGGGAATAACATGC

AGGTAAAATATTTAGCAGGGATTGTCGGCGCAGCCTTACTGTTGGCAGGTTGCAGTTCCA

GCAATGAATTAACCTCTGCCGGCCAGAATGTGCGCTTCGTGCAGGAGAAGCCGGGCGCAG

AGTGTCAGCTGTTAGGGACCGCGACGGGTAAACAGAGCAACTGGCTCTCCGGCCAGAATG

GCGATGAGGGTGGTTCCATGCGCGGTGCGGCAAACGCCCTGCGCAACCAGGCGGCAGCGA

TGGGCGGCAACGTGATTTACGGCGTCAGCAGCCCGACGCAAAACCTGCTGTCGAGCTTTG

TGCCTACCGACAGCGAAATGAACGGCCAGGTTTATAAGTGCCCGAACTGATGCGTGACGC

CTCTCTCCGCGAGCGCAGAGAGAGGCGTGGTCGTTAGATGAGGATCAGGCGCTAAGCTCC

GCTTTCTTTTCAAGGTAGAAGGCGTGTAGGGGACGCAGGCATTCTTCCAGACTGAGCATT

CTTCCCGGCTGGGAAGGGATGATAGTACTGAAGATCTGGCATGGCGCCAGCTCCGCGTGC

ATCGCCTTGAGCTTGGGGCTTTTCTCGATAATCCGCGTCACAACGTTGTTTTCCAGTTCC

GACAAATGCGGCGCGCTGGTTTTCACCACCGCCCCGGAGACAATTTTCTTGCCTTCGTCT

GTCTCGCAGCAGTACAGCACGCCCAGATAATGAGAAAATAGGTTTAGCTTCCAGTCTTCC

TGAGTGTGTTGCTGGTAGTCAATATTCGGCTGGGTAGTCAAGTCGACAGTGTAGCACATT

AAAAAATCCATATTTGAACTTAAATACTTCAAAACCTCTTGATCATTGATTGTTTTCAAT

GCTTGTTGAACACCCGCGAGTAATGCCTCTACCTGCCTGTCTTCAATACATAATGTGCAG

ATTTGCTCATTCTGGAGAACCAGAATGAGAGTCGATTCAGTCTCGCCTGGTTTAAGCGTA

ATCGACATAATACGCCGCTCAGGATTCGGCTGCTGAATCTCCGCCATCTCTACGGCAGGG

ATGTTAGCGATCAGCGATTCATTATAAGCGATAAGCTCTTCTTTATAGGTTTCCCCTTGT

TCGTGTAATCGCTTATACGTCACAAGCAGACGATTTTGAAGTATGAGAAGAAGATCGAGT

AGTATGGGCGCTTGTAGATAGTATTGCTGACAGGGGCCATTTTGCTGCTTTATTTTTAAC

AGCAGCGCCAGAAAGCGGTCTTCAAAGGTAATACCTGCAGTATTAAATCCAATAAACGTT

CCTTGCATAAGTTTCTCCTTTTAAGCTGGCGAGAGGGTCTTTGTCTGCGACAGGTCGATA

ACGCGATCGGCAGAGGCAATCGTCGATGGCCGGTGAGCGACAATAATCCTGGTGATGCTT

AATGCTGAAATAGACTGATTTATCACCGACTCATTTTTTAAGTCGAGATGGCTGGTTGCC

TCATCCATAAAAAGAATACTTGGTCTACGATAAAGAGCGCGAGCGATCAGAATACGCTGC

TTTTGCCCACCTGAAATTCCCAGTCCTAGCTCGCCGACTATGGTTTCATAGCCCATCGGC

ATCTTGATGATCTCATCGTGAATATTGCAGCGTTTGGCGCATTCCATCACAAAATCAATA

TCGGCGTTATCTTCGAAGCCGCTGATATTATCGATAAGCGACCCAGAGAAAAGGCGGTCC

TCTTGCAGTACGCAGGCGATACCAAGACGATAATTATTGAGACCAATTTTGGTGATATCG

AGATTATCGGCTAACACATCACCGCTGGTGGGCGACAACAGACCGCACATCACTTTTAAT

AACGTAGTTTTACCGACGCCTGAAGGGCCGACAAGTGCTACGGACTCACCGGGTTCTACG

GTTATATTTAAATTAGAAAAGATCGGCTGAGAAAACGGATCATATTGATAGCACAAATTT

TTGACTTCCAGTTTGGCACCCGAGTCTGCAGAAAAAACCTCTCTTGTGGGAAGCTCCTGT

TCCGGTTCGCTGAAAACGATCTCTGACAGACGTTCGTTATGTAGGGAGAGCATTCGCAGT

TGCATACAAAGATCGACCAAACTAGAAGCGCGTTGTGAAAATTGACCACGATAGGCGTTA

AACGCCATAAACATACCAAGGGTCATATTATTATCAATAACCATAATCGCGCCAAGCCAG

AGCACGGCGACCTGATCGATAGCAGTAATGAAGGTATTGATCCCACTAAATAGCATATCG

AAACGAGTTTGTTTGATTCCAGCGTTGCAGGCTTCGATATTTATATTAAGCCAATGCTGG

GACCGACGTTCTTTCAAGTTTAATGCCTTGATGGTCGAGATACCGTACAATGACTCCATA

AAATGCGAACTGGAGCGAGCACCTTTGATTACCTGCTCTTCTGCTACACGACGATAGAAT

CGATAAGTTGCAAAACGCATAATTGCGTAGCATAAAGTAAAGCCAACTACGACCCAAGTT

AGCCAGCCACCATACAAAGTTAGCATGATCAGCAGACCGATGGTCATGATTGAGTCAATA

ATGCCGCTGACGATACTGTTAGTAAACGTCGAGCGAATGGTATCCAAAGAGGAAAAACGC

GACTGGATATCTCCTAAATGACGCTTTTCAAAAAAGGATAGTGGCAGACTGGCCAGATGA

TCGAAAAGCGTGGTTTTCCACTGGATACTTGTCAGGGTATTCAGCGTTAAGGACGTCCAG

GCGCGGAGCATACTGATGAAGGTGCGAAATAGTGTAAAAAAGACCAGGCCAATGCATATA

ACTGATAGCAGGCTTTGGTCGTGCGCCATAATCACATGGTCGGTAACCAGTTGAGTACCT

ATCGGGAGTAGTAAGCCGATGGCTTCCACGACCACGGAGAAGGCAAAAATTTTCAGCAGC

GCTGATTTTAAGCCTACTATATTGCGCATTAGATCCAGCAGACGAAGGCGGGACTTAGCC

TTTTCCTGCTGGAAGTTCTGATCGGGCCAAAGCTCTAAGGCAACGCCAGTAAAATAATTG

GACATCTCCTGGATGCCGATAATACGCTTACCCAGCGCTGGATCGTGTACGATAAAGCTG

GATTTGCGAACTTTAGTCAGCACCACATAGTGGTTCATGCCCCAGTGGAGTACACAGGGC

AACTTGAGCTGGCGTATTTCATCCAAGTCTAACGACAGCGCACGGCTTTTTAACCCAGCA

TGCTCCGCTGTTTTGCTTAAGGACATCAGTGTCACGCCCTGTGAAGGACTACCAAAACGC

TGCCGGAAATTAAACAGGTCAATATCCAAGCCGTAATGACCACAAACCATGGCCAGACAG

GCAATGCCGCACTCAGCGGCTTCCGATTGCAATATAACTGGCGTTTTCTTTAGGAGAGAA

AAGTTAACTTTCGCGATGATCTTTTCAAATAGTTCATTAGTCATTGACAGGGCCGCTCAC

GCTTTGAGAAATTTTATAAACTGGTGTAAACATCCACATATAAAGCGGGCGTTCTTCAAG

GAATACCACTGCTTGTGCTTTTAATCCATTTGAAAGAGAAAGTTCTTTTCCATCGTAATT

AAATTTTTTATCCCTTATTTTGACAATTGCCTTATATAATGCAAGTTCTTGTTGATTAGT

GCCATCATTGACATTGGTATATTCTGACATTTCCTGTCGTGAGGCAGGAAGTGATGAGAT

AGAAATGATCTCACCAGGGAACTGTCCGAACTTATCGGAAGGGAATGCATCATAACGAAT

ATTTATTGTGTCGCCGACTTTAACATAAGGAATGCTGTTGTTAGGTAGCCAAAGTATGAG

ATAATACTCGATGTTACCAATAGGTTTGATTTGGGCAAGACTACTGCCTTTATCAACCAT

TTGGCCTTTAGTGACGGCTAATGATTCAATGCGTCCTTCCGTTGTTGCCTTAATGATAAT

ATTTCCGTTAGCGTTTGATTCTACTAGTTGATTTTTATAATCATTTGTCTGATTATATTG

CGATGATATTTGATTATCAAAATCGGCAGCTTTAGTAACTTTATCACTGCTTAACTGTGT

AAGCTGAGTTTCTAGTTGCATCTTTTGGCTTATCAATGACTGATAGGCGCTTTGCTGTTG

AAAGTACAACGAATGTTGGTAATTGTATTGATCTTTTGTAATTAACCCCTCCTTAAGGTA

TTTATCATAACTGGACAGGTTTTCATGCATTTTGCTTAAGCCTTGTTGCGTATTGGCCAG

CATACGTACAGTTTCGTTAAGAGAGTTTCTGGCATTTTTAAGCTGGGCATCCAGTGCAAT

TAGTGTTTCGTTTTTATTATGAGTTAGTTTTTTTATAATAGCTTCGGAGTTGGCTATCTT

TTCATTGATTACCTCAATCTGTGCTGCACTGACATTACCTGTTGTGGTATTTCTAGATAC

ATCAAGCTCATAAAGCGTCTGTCCTTTTTTGACAACGTCTCCAATTTGAACATACTGATT

GACGACAAACCCTTGTTGCGGAGAGAAAACGTTTACGGAGTGAGGGAGAGTGATAACCTC

GCCTTTGACATCAATGCGTTGTGTAAATTTACAGAATATAAGGGCGCAGATAAGAGCGCA

GAGAAATAAAAGAGATAAACATGTAACTAGCCATGCAGGCAAGCCAGCCAGCAATAGCGC

TTTCCCTTTCCAGTGCAACTTCTTATAAGCTATCGCTTCCTTGCGATAAATACTATTAGT

CATGAGTGTTCACAGTATCAACGGTTAATTCAAAGGCTCATAAATGAGCCTTTGAATATA

TAGTAATCTTAATAATCAAATGAAAATTAAGAACTCTTAGTGGCTCCATGGCACAAAGGA

GCCATCGATAATGCCCAGCATGGCTTGCATGGACTCATTCACGGATGCCTCCCAGCCCAA

AGCTGCATAGCCAACCGCGCCGCCAATAGCTCCCATGATTGTTCCCCAGACAGCGCCAAC

CGCGTTACCAAGTAAACCAAAACCTAAAAGACCACCATTAGCGCCGGATTGAGTACCGCC

CCAAAGCAGGCCATAGACCCCCCATGTGATAGCTCCCAGGGCGGCTGATGCAGCTGCTTC

TACACCATTACTTACCAGACTGGTGACGGTTGATTGGATTGAGGAGAAATCCCAGCTATA

ACCCCCGGAAATGGTATCCATTTCAAATACAGTTAATTCTTTCACGCAATAATTCCTTTT

GTTGGTAAAGTTATGATCTAATAAAATAATGACATTTATCGAGTCTGTAGATTATTTCCA

AACGACAAAGGTGCCATCAACTAAACCTTGTGCGCCAGCTTCGATAATTGCCATGGTCCC

GTCCCATCCCCAGGCCAGACCACATCCTGCGCCGAGGATTGCACCACCGACTAAGCCTAC

AAACATCCCGACGAGGTTACCAAAGAGGCCAAATCCCAGGACGCCGCCATTTGCCCCAGC

CTGTGTACCGCCGACAAAGGTGCCAAAGACGGCCGCCAGAGTTCCCATGGTGGCAGCAGA

AACCACTGCTTCAACGCCATTACTTACGAGACTGGTGATGCTGGATTGGATGGAGGAAAA

ATCCCAAGAATAGCCACCAGAGATGGCCTCCATTTCGAAAACAGTCAATTGCTTCATTAA

TATATCCTTTATTGATGAAATTATATTTCGTATTACAAGTAGGCTTAATATAAGCCGGGG

AGGAATTTAAGTGAGAGACCTGAAGAGATCAATAGCATCCTATGTGAATTTTATGTGATT

TCATTAATCATTTATAGTGTCATCATGAGGACTATAAAGCAAAGGAGATGCATGATATTA

AGCTATGCACCCCCTCAATACAAAGTTATTATTCTTCCTGAATAACAACTTCCATCATTC

CTTTAACAAGCCCCATCGTAACATCGTTACTGTTATCACTTTGGCGATAATAGTCGGCGG

TTAGGTTGATGGTTTTGTTAAGATCGTTGCTAGTGTTTATTTTATAATTGTAATTATCGG

TATCATAGAAAACAACAGGACTACCTGAAAGTTTGAATATAATACCCACGTTATTTGCTG

CATCACTGCCGGAAAGCATATTATCGACAATACCATTCCCTGAAGCGCTTATTCCTCCAA

CAGGATTAAACCAATAGATGAGAGTATTGCCAACGGAGTCATTCGGGCAACTAATATTCA

TGGCAATAGTTTTCTCCGACGGAGTTGTTGCACCACGGGAAAGTGACATCAATTTTCCTT

TGTCTATACGATTCAGCGTGATTTGCGATCGTGGTGTGGAGATATTACAAGATGTTGTGC

GGTAATTAATATTTTTAATAGAGATAGAGGTTACAGCGTATAATAGTCTGTCATTGGCAA

CAGGGTTTGTTTTTAAATTCCCTACCGAGAACGAAACTGAGGGGTTAGATGTTGACTTGG

TGCTCGTATCAATCACCGTCTTAGTTTTGATTAACCATACCGTAATAAATTGGTAATTAT

TTTCAGATGAGCTTGTTATTGGTACCAAGGTTGAACCTGCCTCGGCGGCGATCAATGAAC

CATTTTTACTACGTAACAGATCGGAGACCTGAAACCCAATCCCATCAATCCCCGTTTCAT

AAACCGGACCACCCTGAACACCGGTAACACCAGGAACAACGGCAGCCCCGACGTCAATAA

TATATTGGTCATCGGTGTTTTTATTACAGGTAAATGTTTTATATGCGCCAGTACCAAATT

TATGAGTATGTAACACGCTACCTACCGGAATGGAAGCATCTGTTGGTATTTTAATATTGG

TCAGCGTTAAGCCTTGACGCTTGGTATTGCCTTTATAGGTACAATTGGTAGCAGCTTGGC

CGCCAAGCATCAGCAACGTTATTAAAATAACTATTTTTTTCATTAAAATATTCCCCTGTG

AATGACTAACGGCAAATCGTTTCGATTTGCCTGATGCCAGACGCTTTGCCTTCCCTGGTC

GGTAAAGTAAATGAAGCATTGCACTGCTGCGCGGCGCTTTTGCCCCACTGGACGTTAAGG

ATCCCGGTCTGCTGCAGGCCAGACATATAAACCATACCAGCGTCGCTGACGATACTTGGC

TGCGATTTGCTGTCGCCGACGAGTAGGACCATCGCGCCATAAGGCACATCCTGCCCACTG

GCTGTTTTCAGGTGCACAAAGGCCCGCTGGCCGATATTGCCGTCATAGCTTGCACGCACG

ATGGCGCCACGCGTCGGAACAACACTCTTGGTGGTTTCTGGCAGTTCCATATCTTCACCA

AGCGTGGTGCTGTCGAGCGTGATATCGGTGCGACGATAAGGCGTAACATACGGGACGATG

GCGTAGCCGCGATAGTCGGTGGAGATGGTGTTATCGTTGGCCAGCCTGACGTCATCTAGC

CCTGGTGCTTTAACCAGCACGGCAGCGTCGGTGATATCCTGACCCAGCGTAATTCCATCG

GCATGGGCAAGGATGCTGCCGTTGGCGCCGTAGTCGATACGTTGGCTGTTATTGTCATAG

CTATAGCCGGCATTAACGCTACCGCGGGCACCGTTATAGGTTGCGCGCATATCGCCGCTG

TAGTATTCGCGGTTGCTGTACCCTTGATGTAGGCTCCATTCCAGACTGTCGTTCTCCAGC

GCATTACCACCGATGGATACAGACTGATCGGTAGACCCCGGGTTGCTGTTAGTTAATTGA

TAGCTGGTGTAAGTGCCCGGTAGCCAGTTGCTCAGTGGCAGCGTTACGGTCAGAGTGATG

CGCTGATCGTCCTGAGCATCCTTACCAGAGTTATCTCCGCTCCAGGTGTAGCGGTTATAG

CTGTAGCCGAGGTAGTAGTTCACATTACGGAAACCGCCGTTGTATCCTACGCTAATTGAT

TTGTTGGTACGCTTATCATCCCAGTAATCTTCAATCAATCCGCTTATCGACAGGCTACCG

AGGCCTTTACCCAGGCTTTGGTTCAGCGTCAGGTTGGTACGGTTGCGTAGCGAACGAGAG

GTATAACTGCCGTCATTAGAGTAGCTATCCAGTACTTCGGAAAGCGTATTAAACCCGCGA

GTAGAGTAGCGATAGCCGGCGATGGTGACGTTGGTGCCGGTTTCGACAATGTTTTTCCCG

TAACGAACTCGCCAGGACTGTCCGGAAGTCTTTTCATCCTCTTTCTTTTTTGACCAGGCT

TGGGTGACGTCTGCCGAGGCGGCGCCCAGTTCACCAAGGTTATAGCCAAGCCCTGTCGAC

AGCGCCTGATATCGCGAAGCCGCCTGCATGCCGCCATATAGCGTCAGGCTGCTGGAGACG

CCGTAGGTCGCGGTGGCTTGGGTAAACGGCGTTTCATCGACTCCGCCATCGTACGGGCGA

TATTTACCAGATGTGATCTCATATTCCAGCTGATCCTCACGGACCATCACCGGCAGGGTG

GCGAACGGCACGACAAATTCTTGTTTCGATCCGTCGGATTCCTCCACTGTGACGTAAAGG

TCGCCGCTACCGCCGCTCGGGTACATATCGGTGATTTCAAACGCCCCGGGAGCGACATAG

GTCTGGTATACCTGATAGCCGTTTTGTTTAATGATGACGCGGGCATTGGTTCTGGCGATA

CCGCGAATAATTGGCGCATAGCCGCGCATACTTTCCGGCAACATCGTCGTATCGGTGGCC

AGCTGAATACCGGTAAACGGCACGCTGTCGAAGATACCGTTGAGCGATGAACTCTCACCC

ATCACAAGGTTACTATTGATGGAGCGGATGCTGCGCTGCATATAGAGATAGGCGGAATCC

CAGTCCCCGGCACCGCTGTTGTTTTTATTCCAGGTGCTGAGGTTACGGATGCGCCACGGG

CCAACGTTGAGGCCGGACTGCAGATTCAGACTGTAGTATTCATCATTGGCCTGCATGTCG

TTTGAGCCGCTGAACTGATAGTTCACCAATAACGCGTTGATGCCGTCATCAAACTGATCC

GGTGGAATATATCCCTGTGCGGTGGTGGATAAGGCCGCCTGCGGAATAGAGATATTTAAG

CGCTGGGCGGTAAAGTCAAAATCTGCTTTGGTGTCAGGAATGACAGAAAAGTTTGCACAG

CCGTTTTGATCCTCGGCTAACTCTGGAAAGGCTTTTATCCTTACGCCATATTCCGCGAGT

GCTTTTAGACTCAGGCAGGGAACCAGAGCGGGTTCGCGGTTATCGCTGCTGGCGCGATTG

TTGGCGACAAACTTTATGGTCCTGGTGTCCAGGTAGCGGCCATTAAACATAATATCGACC

CGATAATCCCCTGGCGCCTGCGCGTTCTGAGTCTGAAATATGGATAAATCGGGAGTGGTT

GATGGATCGCTACCATTCAATGAGCTAATGAATGAGGGATCGAAAAAGTCACGTGCTTGC

GCTTTATTATTCAAACCAGAAAGCAATGCCGAAAGCATTGCGATAAAGACAGTGGATAGT

TTGAATAATCCATTATTCTTATTTGGCATAGACACATCCCTATAATGATAAAATAAATTT

CTTATTACAGCGATGAGGAATAGAGCGACCCTGCTCCGCCATAATCATTGACGATCTTCC

AGGTAATGCTGGAGGCGCTGATGTTTTCTTTTAGCGTCACCTCTTTAGTGGTCATTGGAG

CGACCGAGTTGACTTCTGGTTTCACTTCTTTGCCACCGATCTGAATGCTATGGAAATAGT

AAAAAAACGGTGTCGGATTTTTGATCGTTAATTTAGTGCCAGCTTTACGCCATTCGAGCT

TTTTCGCTTCCGTATTAGGGGATAGATCGAAAAGCGTCTTGGGACGATAGACCAGGCGCA

TGCGGTGGCGGACCGCCAGTTGAATGGTATTGGTGCTGGCTTTTTCATCATCAGCCGGAG

GAATTGCCATCACGTTAAAATAGTACAAAGATTCGCGGTCAGTCGGGGCATTAACGTTTC

CAGTTGAAAACAGACGCACCGTATTCTGCTGTTTTCCCTCAAGGCGGAACAGCGGCGGGG

TAGCCATAAAAGAAGGCGCTTTCCCTGCCGGGGTTTCAACCCAAGATTTAATCAGATAGG

GAATATCATCTTTATTTTCGATTTGCGCGGTAATTTCCCGTGCACCTTCTTTATAAAGAT

AGCGGGTGGATTCAATGACAATACCGGCGTGGGCAATACTGCTGAGGAGTAATACACAGG

ATGCGGTGAGATTTAATAAGGTCCTGAACATGGTTTTTCTCTGAATGCGAAAAAGGGCCC

GCCGTAAAGCGGTGCCCTTCGGAAAAAATTAGAGGGTGTAATCGATAGTAAAGGTCGCAA

CACCTTTAACCGGACCTTCAGTTACCGGGGTCGCGGCGTTGGTTCTTACATAACCAGTGG

TGTATTTCAGCTGAGTACCGCTAGCGGCAGAGTAGCTTTCGGTCATAGTGTCGGAACCGT

CGAAGGCTACGCGATGGGAATCGCTGATGCGCTGGATACCGATACCAATACCGGTTGCAC

CATTAGAAGCAGTGTTGTCCAGGATGGTATTGTCGCTGGAAGTAATACCGGAAACGTTTA

CAGTTACGCCAGTAACCGGTGTAGCGCTGCCCTGTGCACAGTCTTTTACGTCAAAACCGA

AATCCTGAGTTTTGAACAGGGTACCCGCTGATTCTGCATTCGCTTCGGCAGTGGTTACGG

TGATCAGCTGAACGATACCGCTATTCAGAGTACCGGTTGGGGTCACGACGCAAGAGTTAG

CTGCATCAGAGACTTCACCCAGTACAGTTACCTGAGCGGTGTTGGTTGCCATTGCCTGAG

CACTCAGCACTGCAGATGCAGCGACCATTACAGCTACGATTGTCTTTTTCATTTAATTAA

TCCATATATAGATACTTAGTCCTGTGTAGAATCGATAACAGTTATCAAGGGAATGGAGTA

TGCATTCGCATTGATATTGAAAATAAGCGTCAGCTTTCCTTTATATAGTGCTGAGACCAA

TCATCCTGTTGAACGACGCTACCATATCGCTTGCCATAGCGAACCATGGAGAAGCGGGAG

TAATTTAAAAGTCTGGTGCAAAAAATGCTTGTGAATTATTGATGAAGCACCCGTGAATTT

AATGCTGCCCCCCTCTCTGATGAGATGTGGATTCCAGTTGAGATTAATTTAATCTGAAAA

TGTGACCATTAAGCAAGTTAGCTATCGCTTGTTTTTTTATCTGCGGTATCCTGTGGGCTG

AACTTCAATGTGAAATGTACCTGTTTCCATCTGAAACAAGAGTGTTCACATAATCGTTTG

GTTGAAATCATTTGATTTTATTATGGATAATAGGGTTACGTGGGGCAAGGATATGGATGA

CGCAGTATTATTTAATGGGTGTATAATTAATCAGGAGATTATATTTAATGCCAATATGAA

TGAGCTGCGGCCGCTTGCCGGGGACGGGGAGTGCATCAGCCTCAATGCGCCAACCGCCAG

ATGCTTGCTGCTGCTTTTGCAGAATTGCGGCAAAGTCATTTCACGGGATGAGTTCCTGGC

GGCTGTATGGGAAACACGGGGGGTGGTCGTTTCGCAAAATACGTTCTATCAAAATATCTC

TTTGCTGCGAAAATCGCTGGTAAAAGCTGGGCTATCTGAGGATATCATTATCACCGTCCG

GCAAAAAGGCTTTAGCGTCGCTCCGAATACATTGGTCATTCCTCTCTCTGATGAAGAGTG

TGAGAATATGAACCGGGTGACATTAACGCATTATCAGAATAATAAAGTTGTTGGCTTTAT

TTCTGAAGATAAGGAAAAACCTGACACTCATTTAAATCTTCCACTAATAGAAAACTCATC

AAATCATGGCAGTGATTTGATGGCAAATAAACCGGAAGAAGGTGAAAAAGTATCTGAGCG

GTTACATGTTACTTTTAAAATACCCATATGGTTAATCGCGCTAATTGTCGTGATGATTGT

AATTAATATTATTGTGTTGGTCGTGCTAAACCGGTAGCTCGTCGCACCCAGGGGTTATAG

CGCGGTGCGATAGTCATTTGCTGGTCACCTTAACACCCGTCTGTCGAAATCTTCCTATCC

GAAGGTCTGCCAGAACGTCCTGGCAGACCTTCAGTTTATTAACGCTGCTTCAGCCCTAAA

TCCAGCGGCGTCTTGCTGGGTTCCCCGCCAATCTCGCGCGCCAGCTTCGGCACCATATAG

CCGGAGATGAGGGTCAATAGTTCACGCATGATTTCACGGGCTTCATCATCGCTGACCATG

AAGTGCGCCGCCCCCTGCACCCGATCCAGCACATGTAAGTAGTAGGGCATTACCCCGGCG

TCAAACAGCGCATTGCTGAGGTCGGCCAGGGTTTGCGCGTTGTCGTTCACCCCGCGCAGC

AGCACGCTCTGGTTGAGCAGCGTGACGCCCGCCTGACGCAGCATGGCCATCGCCGCGCGA

AACTCACCGTCAATTTCATTGGCGTGGTTAACGTGGTTAACCAGGATCACCTGCAGCGAC

GAACGCTGGAAGCGGCTGGCCAGCGTCTCGGTGATGCGCGCCGGGATCACAATTGGCAGG

CGGCTGTGAATACGCAGACGCTTAACGTGCGGAATAGCTTCCAGCTGGGTCATTAGCCAG

TCAAGCTCATGGTCCTTTGCCATCAGCGGGTCGCCGCCGGAGAAGATGATTTCATCAAGC

TGCGGATGCGCCGCGATGTAGTCCATCGCTGTCTGCCAGTTGCGCCTGGTGCCCTGATTT

TCGGCATAAGGGAAGTGGCGGCGGAAACAATAACGGCAATTGACTGCACAACCGCCTTTC

ACCAGCAGCAGGGCCCGGTTGCGATATTTGTGCAACAGACCGGGCACCACGCTGTGCTGT

TCTTCCAGCGGATCGGTGGAGTAGCCGGGGGCGACGATAAACTCTTCCTCGGCGGTAAGT

ACCTGACGAAGCAGCGGATCGTTAGGGTTGCCTTTCTCCATGCGGGCGATAAACGCGCGC

GGGACGCGCAGCGGGAACAGGCGTCTGGCCTCGCGTCCGGCCAGCAGTTTTTCATCAGCG

TCTACATTTAAAAGACGCAGCAGTTCATCAGGACTGGTCACAACATTGGCAAGTTGCGTT

ATCCAATCTTCTCTGGATGGGGTATTTAGGGTTACAATATGCGCCATTTTGTGGCTTAGC

TACCAGTTAAACAATTTCAGAGGGCCTTATGGCGACTTACTATAGCAACGATTTTCGTGC

TGGTCTTAAAATCATGTTAGATGGCGAACCTTATGCGGTAGAAGCCAGCGAATTCGTTAA

ACCAGGTAAAGGCCAGGCGTTTGCGCGCGTTAAGCTGCGCCGTCTGCTGACCGGTACCCG

CGTTGAGAAAACTTTCAAATCTACCGATTCCGCAGAAGGCGCGGACGTTGTCGATATGAA

CCTGACTTACCTGTACAACGACGGTGAGTTCTGGCACTTCATGAACAACGAAACCTTCGA

GCAGCTGTCTGCTGACGCGAAAGCGATCGGTGACAACGCTAAATGGCTGCTGGATCAGGC

TGAGTGCATCGTGACCCTGTGGAACGGCCAGCCGATCGCGGTCACCCCGCCGAACTTCGT

TGAGCTGGAAATCATTGAAACCGATCCAGGCCTGAAAGGCGACACCGCGGGTACCGGCGG

TAAACCGGCGACCCTGTCTACTGGCGCGGTGGTTAAAGTTCCGCTGTTCGTTCAGATCGG

CGAAGTGATTAAAGTGGATACTCGCTCTGGCGAATATGTATCCCGCGTGAAGTAATTTCG

CGTCATGATGACCGGCGTAGCCTCCGTGCTGCGCCGCTCTTTTCGTACAGGCACAACGAG

CACGATACATGAAGCGCAGCGTTAAACTCCTGGTGTTACTCTTTCTGAGCAGCGCACTGT

TGGCTGGCTGCAATACCGCCCGCGGTGTGGGTGAAGATATTCAGGGCCTGGGCCACGCTA

TCTCTCACGCTGTGAGCTGAATTTCCCTGCCGTTTCGTTAATGGCGCTTGCCTCCCGGTA

TGTCAGCCTCCTCCACGCATACTCCTTTTCTCTTAAAAATCGCAAAGATCCCTTCATCTT

TGGACGGTTTGTCTATGCTTATAGGGCATGAAAACAAAACTGACACTAAGGATGACATTA

TGGTGAAAAAAACGATTGCAGCGTTCTTTACGGTTTTGGTCCTCTCTTCAGCACTGACCG

CTTGTAACACCACGCGCGGTGTCGGTGAGGATATTTCAGACGGCGGCAACGCAATCTCTG

GCGCGGCAACCAAAGCTCAGCAATAAACGCCGTCAACGGTACGGTTTAGCGCCGTACCGT

TCTTCACTTCTCTCATTCCGTTGGATATACTCACCACGACTTTTCATCCACCTTACGGGA

CGACCCGTAAGCGTTTCTCATCCGGGGACGGCCCCAGCAAAGGAGCCTTATGTCCTGGAT

AGTCTTGTTTATCGCTGGCCTGCTGGAAGTGGTGTGGGCCGTCGGCCTGAAATATACCCA

TGGCTTTAGCCGCCTGGTTCCCAGCGTTATCACCATCGTGGCGATGGTGGCCAGCATGGC

GCTGCTCTCATGGGCGATGAAAACCCTACCGGTAGGTACCGCCTACGCCGTCTGGACCGG

GATCGGCGCCGTGGGCGCCGCCGTGACCGGTATTGTGCTGTTAGGGGAATCCGCCAGCGC

CATGCGTATCGCCAGCCTTGTCTGTATCGTGATTGGCATCATTGGCCTGAAGATCAGCGC

GCACTAATCATAGCGCTGATTGACCCAGACCAGTTTGCCGACATCAAAGCCCTGTCGGGT

GGCAATGTCCAGCATCTGCTGCCTGACCTCCGGGGCGATGGTCGGCGCCCGGGCCAGCAG

CCAGAGATAGTCGCGATCGGGGCCGCAGACCAGCGCGTAACGATACTCCTTATCCAGAGC

AATGACGTTATAGCTGCCGTAGAAAGGGCCGAAGAAGGAAATCTTCAGCGCGGCGCGGCT

GGGCTCCCCGGTAAAGTACGCTACCCCGTCCGTTTTCTGCCACATACCACGGTCGGGGTT

ATAGCCTTTATTGACCACGTCCAGGCCACCGTCATCGCGTGGGTGCCAGGCGATCGTGAC

CTTTTCCAGCCCGCTTTCAAAAGGGTGGTCAAAGCGGGCGATTTCATACCAGGTACCCAG

ATAGCGCTGAACGTCGAAGGGACTGACCACGGTGACGCCCGGCGGCGGGGCGGGCGTGCT

GCAGGCGACAGACAGGAACGAGACGGCAATCGCGGTGATTATCGGCAGGATACGCATGGC

ATGCTCCTTGCTGGCTTTTAAGCTAAGTGTAGAGTCCAGCAGGGAAAAGGCGGCAAGATT

TTTCTATGAAGCGAGCCCGGTAGCAGAAATGCGACCGGGCTCTTGCAGGATCAGATAAAT

AGTACGCCAACGAGGGTGATGACGCTGAGGATTGCCGCCAGGCCGTAGAAGACCCATTTA

CCGTTGGGCACATGGATTTTCAGATCGTGCATGGCGTGGTGAATACGATGCAACCCACAC

CACAGCGGCAGGACAATCATCAGAAAGATGAATGCGCGGCCGATAAAGCTTTGGGCAAAG

GCCAGCACACGCTCATAGCTAAAGGCGTCGGCCGGGGCGAGCCCCAGCGGCAGCAGGATG

CCGACCAGCAGCACCATCACCGGCGCGACGATCGCGCCCCACATGCCGCCTGCGCCAAAC

AGCCCCCAGAATACGGGTTCATCGGAACGTTTCGGATTGGGATTAATCATCTCAGCCTCC

TTACCAGAACAGGGCGACAAACAGGATCACCACGGTGACCACCGCCGTCACCACCCAGAG

CCCTTTAATGACCGGCTCTGGCCCCATTTTTTCGCCTTTGATGATGACGTTGGCGGCTTT

CGGCGCCAGCTCAAACCAGGTTTTGGTGTGCAGCAGCGCCGCCGCCAGAGTAATCAGGTT

GAGGATTACCACCACCGGGTTTTGCAGGAATCCGATATATCCCGCCCAGCTCTCGGCGCC

GTGCTTGAGGGCAAACAGCCCATAAATCAGCACAATGCTAAACCATACCGTCGGTACCGC

CGTGCCTTCCCGTACCATGTAGAAGCGATAAAACGGCAGCTTTTTCCACCAGGTGGAGGT

CATTGGTCGCACGTAGGGTTTGCGTTTCGTCGTCATAATGCGCTCCTTAGCGTGGTTTCA

GGGTGGCGATAAGAAAGTCTTTCGAGCTTTCCACCTTGCCCTGCTGGATCGCGGCCGCCG

GGTCGACGTGCTTCGGACACACTTCCGAGCAGTAGCCAACGAAAGTACAGGTCCAGACGC

CATTCTGGCCGTTAAGCTGCGCCATGCGTTCCTTTTTACCGTGGTCGCGGCTGTCTTCGT

TATAGCGGTGGGCGAGGGTGATCGCCGCCGGGCCGATAAATTCCGGGTTCAGGCCGAACT

GCGGGCAGGCGGCATAGCACAGCCCGCAGTTGATGCAGCCGGAAAACTGATGGTATTTCG

CCATCTGGGCCGGGGTCTGCTTGTTTGGCCCCTGGTCAGGCGTGCGGTTATTGCCGATGA

TATACGGCTTAATGGCTTCCAGGCTTTCGATAAAGTGGGTCATGTCCACCACCAGATCGC

GCTCGATCGGGAAGTTGGCCAATGCCTCCACCTTGATGCCTTTGGTGTAATCGCGCAGGA

AGGTTTTGCAGGCCAGCTTCGGCACCTTGTTGACCATCATGCCGCAGGAACCGCAGATTG

CCATTCGGCAGGACCAGCGGTAGCTCAGGTCTGGCGCCAGGTTGTCTTTGATGAAGCCCA

GCGCGTCCAGCAGCGAGGTCTGTTCATCGTAAGGCACGTCATAGAATGCGCTGTGCGGTG

CGGTGTCGACCTCCGGATTGTAGCGCACCACTTCGACTTTCAGGTTTTTCATCTCAGCCA

TGGGTGGTCTCCTTCTTCTCAGCCGCGTCCGCTTCTGCGCCATAGACACGTTTTGCCGGC

GGCAGCGTGGTGATCTTCACATCGCCATATTCCAGACGGGTAGTGCCATCGGCCTCGCGG

AAGGCGAGAGTGTGCTTGAGGAAGTTGACGTCGTCGCGTTCGGTACAGCCTTCATCCAGA

CGCTGGTGCGCCCCGCGCGATTCTTTACGGGCGATGGCCGAGTGCGCCATACATTCGGCA

ACGTTTAAACCGTGCCCCAGCTCAATGGTGTAAAGCAGATCGGTATTGAACACGCTGGAG

TTATCGGTAATGCGCACGCGCTTAAAGCGCTCCTGCAGTTCAGCCAGCTTGTCGATCGTT

TTCTGCATCAGCTCCGGCGTGCGGTAGATGCCGCAGCCTTCCTCCATCGACAGCCCCATT

TCATCGCGAATTTTCGCCCAGTTTTCGTTACCTTCCTGTTTGACGAGATCTTTCAGGCGG

TGCTCCACATCGGCAGCCTGCGCATCGAGGGCGGCGCCGTTTGCCTCGCCCGCCTGAGCG

GCGCGCTGCATGGCCTGCTCCCCGGCCAGGCGGCCGAAGACCACCAGCTCGGCCAGCGAG

TTGGAGCCCAGACGGTTGGCGCCATGTAAGCCAACGGACGAGCATTCGCCCACGGCAAAC

AGCCCTTTGATCCGGGTTTCGCACTGCTGATCGGTTTCAATACCGCCCATGGTGTAGTGC

GCGGTCGGGCGCACCGGGATCGGCTCTTTCACCGGATCGACGCCGACGTAGGCTTTCGCC

AGTTCACAGATAAACGGCAGACGCTCCAGTAGTTTTTTCTCGCCGAGGTGGCGGAGATCG

AGGTAGACCACGTCGCCGCGCGGCGTCGGGATGGTGTTCCCTTTCCGCCACTCGTGCCAG

AAGGCCTGGGACACTTTGTCGCGTGGGCCTAGCTCCATATATTTATTCTTCGGTTCGCCG

AGCGGGGTTTCCGGGCCCATGCCGTAATCCTGCAGATAGCGGTAGCCGTTTTTGTTGACC

AGAATCCCGCCTTCGCCGCGGCAGCCTTCGGTCATCAGGATCCCGGAGCCCGGCAGGCCG

GTCGGGTGATACTGAACGAATTCCATGTCGCGCAGCGGCACGCCATGGCCCAGGGCCATC

CCCATCCCGTCACCGGTGACGATGCCGCCGTTGGTGTTGTAGCGGTAGACGCGCCCGGCG

CCGCCGGTAGCCAGCACCACGGCGTTAGCGCGGATCTGCACCAGGGTGCCTTCCATCATA

TTCATCGCCACCAGGCCGCGGGCCTGCCCGTCATCGACCAGCAGGTCAAGGACGAAATGT

TCGTCAAAGCGCTGAATTTGGGGAAACTGAAGGGAGGTCTGGAAGAGGGTATGCAGCATG

TGGAAGCCGGTTTTGTCGGCGGCAAACCAGGTGCGTTCGATTTTCATGCCACCGAAGCGC

CGGACGTTGACGCTGCCGTCGGGGCGGCGGCTCCATGGGCATCCCCACTGCTCCAGCTGG

GTCATTTCCGTCGGGCAGTGATGAACAAAATAGTCGACGACATCCTGCTCGCACAGCCAG

TCGCCTCCCGCGACGGTGTCGTGAAAATGGTACTCAAAGCTATCGTGATCCTGGGCAACG

GCTGCGGACCCCCCTTCTGCAGCGACCGTATGGCTGCGCATCGGATAGACTTTAGAAATC

AGGGCGATTTTAGCGTTGGGGTTGGCCTGAGCGGCGGCGATAGCGGCACGAAGGCCTGCC

CCGCCGGCGCCAATTACGGCGAGATCGGCTTGAAAAGTTTGCACGACATTCCTCCAGTTT

TAGTGTATTTCGCCGCCGGGCTGGCGAAAAAGTATCACTGCTCCTTTATAGGTACAGGAG

TATAGCCTTAGGGTCAGTATGGAAAATTGACGTGTTCGATTTTTTTATCGATATGTGCGG

TTATTTATCAGTGGTATTTATGCGTCAGGGTTAACGATAGATTAATGGCATGTAGTCTGC

CGGATATTGCACAAAATTTGTTTCACTCGCCGGTTGCGAGTAGACTTCGTGCCCTTAATT

TGCAATCGGAGAAAGTACCATGAGCGAGACGGCAACCTGGCAGCCGAGCGCACCCATTCC

CAATCTGTTGAAGCGCGCGGCGGTGATGGCGGAAATCCGCCGTTTCTTTACCGATCGCGG

CGTGCTGGAGGTGGAGACGCCTTGCATGAGTCAGGCGACGGTAACGGATATTCATTTGTT

CCCGTTCGAAACCCGTTTCGTCGGCCCGGGCCATTCTCAGGGGCTTAACCTGTACCTGAT

GACCAGTCCGGAATACCACATGAAGCGCCTGCTGGCGGCAGGTTGCGGCCCGGTCTTCCA

GCTGTGCCGCAGCTTCCGTAATGAAGAGATGGGGCGTCATCACAATCCGGAATTCACCAT

GCTGGAGTGGTATCGTCCATGCTATGACATGTATCGCCTGATCAATGAGGTGGACGATCT

GCTGCAGCAGGTGCTGGAGTGCCAACCGGCGGAAAGTCTCTCCTATCAGCAGGCGTTTCA

GCGCCATCTGGAAATTGACCCGCTCTCTGCCGATAAAGCACAGCTGCGTGAAGTCGCAGC

GAAGCTGGATCTGAGCAATATCGCCGATACTGAAGAAGATCGCGATACCCTGCTGCAGCT

GCTGTTCACCATGGGCGTGGAGCCGCACATCGGCAAAGATCGACCAACGTTCATTTATCA

TTTCCCGGCGACTCAGGCCTCTTTAGCGCAGATCAGCCCGGAAGATCATCGGGTCGCTGA

GCGCTTTGAGGTCTATTACAAAGGTATTGAGCTGGCGAACGGTTTCCACGAGCTGACCGA

CGCCCATGAACAGCGCCTGCGGTTTGAGCAGGATAACCGCAAACGCGCCGCGCGCGGCCT

TCCGCAGCAGCCCATCGATAACAACCTGCTGGCGGCGCTGGAGGCGGGTCTGCCGGACTG

CTCCGGCGTGGCGCTGGGCGTTGACCGCGTGGTCATGCTGGCGCTGGGCGCTGAAAGCAT

CGGCGAAGTGATCGCCTTTACGGTAGACCGCGCCTGATCGCTTTTTCACCTCCCTCCGCC

GCCGGGTGGGGGAGGTGAAAGACGACTCTGGACCTGACACCCTCGCCCCGGCTTTAGCCC

GAATACCCACAATTTCCCTCCGTGATTTTGCTACTATCCGCGCTCTTTTTATGAGGCCAG

GCGTCGCTCGTCGGGCGATGCCCACGTTTGGATAGATTTATGCATCAACAACTCAAGAAG

ATGAGCCTGATCGGGCTGATTCTGATGATCTTCACCTCGGTGTTTGGCTTTGCCAACAGC

CCATCGGCGTTTTATCTGATGGGCTATAGCGCGATGCCGTTTTACCTTTTTTCCGCCCTC

TTTTTCTTTATCCCGTTCGCGCTGATGATGGCGGAGATGGGCTCAGCTTATCGTCGCGAA

GAGGGCGGGATCTATTCCTGGATGAACCACAGCGTCGGGCCGCGCTTTGCCTTCATTGGT

ACCTTTATGTGGTTTGCCTCGTACGTAGTGTGGATGGTGAGTACCGCCGCTAAGATCTGG

GTCCCGCTATCTACTTTTTTGTTTGGCGCGGACAAAACCCAGACCTGGGCGCTGGGTAGC

CTGACGCCGACGCAGACGGTCGGTATTCTGGCGGCCTGCTGGATGGTCGTGGTGACCTTT

ATTGCCGTCAAAGGGATCAATAAAATCGCTAAAATTACCGCCGTCGGCGGTATCGCGGTG

ATGGGGCTTAACCTGGTGCTGCTGCTGGTGAGCGGGGCGATCCTTCTGCTTAACGGCGGT

CATTTCGCCCAGCCGTTAAACTTCACCCTTTCGCCTAATCCCGGGTATCAGTCGGGCATG

GCGATGCTGTCGTTTGTGGTATTTGCCATCTTTGCCTATGGCGGAATTGAGGCGGTTGGT

GGCTTAGTGGATAAGACCGATAAGCCGGAAAAGAACTTTGCCAAAGGTATTATCATCGCG

GCGATCGTTATCTCGATCGGTTACTCGCTGGCGATTGTGCTGTGGGGCGTGAGCGCCAAC

TGGCAGCAGGTGCTTGGCGCGCGTTCGACCAACCTCGGCAACATCACCTATGTGCTGATG

ACCAGCCTCGGGGCGACGCTGGGCCAGGCCCTGCACCTGACCCCTGCGGCGTCAGCCCTG

ACCGGGGTCTGGTTCGCCCGTATTACCGGCCTGTCGATGTTTCTCGCTTACACCGGCGCG

TTCTTCACCCTCAGCTATTCTCCTCTGAAAGCGATTATCCAGGGCACGCCAAAAGCGCTC

TGGCCGTCGGTGATGACCCGCCTTAACGTCAACGGAATGCCCGCCGCGGCGATGTGGCTG

CAGTGTCTGCTGGTCGGGGTGTTTATCGTACTGGTATCGTTCGGTGGGGATAGCGCTTCC

GCGTTTTATAACAAGCTGACGCTGATGACCAATGTCTCTATGACCTTGCCTTATCTGTTC

CTGACCATCGCCTTCCCGTTCTTCAAGGCGAAAACCCATCTTGACCGGCCGTTCGTGATC

TTCAAAAACCGTCCGTCGACGCTGCTGGCGACCGGCGTGGTGCTGCTGGTGGTGACCTTC

GCCAATATCTTCACCATTATCCAACCCGTCATCGACAGCGGGGACTGGAACAGCACCCTG

TGGATGGTGGGTGGACCGATCTTCTTCTCACTGCTGGCGCTGGGGATCTACGAAAGCTAC

CGTCGGCGCATGGCGTCCGGCGCGCTGGTGATGGAGAGTTAAAGAACCTGCCCGGCGGTG

CAGCCGGGCAGGGGATGGTTTACAGGCTACCAGCCGTACGGCGGCTGGTTTTTCCGGCCG

AGGTCATGGTTTTACTGCTTTGCCTGCCGTCAATACTTTCCAGACGCATCTGGAACGGAG

GGAACGGCATATCAATGCCATGCTCGCGGAAGCCCGCCAGGATCAGCTGATGCATCTCAT

GGCGCAGCGGCATGCGGTGCCCCATCTCCGCGGCAAAAATACGTAGCTCGAAAATCTGGA

TCCCCTGCTGCAGGTCGACGAGAAACGCCTCCGGCGCCGGGGTATCGATGACCAGCGAGC

AGCGATGCGCCGCGGCGATGAGAATTTTCGTCACCTCTTCGGTATCGGCGTCCACAGGCG

CCGGCACCGTCAGCACCACGCGGGTAACCGAGTCCGACAGCGACCAGTTGATAAACTGTT

CGGTAATGAACGCCTTGTTCGGCACGATAATCTCTTTTCGGTCCCAGTCGCTGATGGTGG

TCGCACGGGTATTAATGCGGGTGACGCTGCCCGTCAGGTCGCGAATGGTGACCGTATCGC

CGATGCGGATCGGCTTCTCAAACAGGATAATCAGGCCGGAGATAAAGTTGGCGAAGATCT

CCTGCAGGCCAAACCCGAGACCCACACCCAGCGCGGCGACCAGCCACTGCAGCTTCGACC

ACTCGATACCGATCATCGAGAAGCCCACCAGCCCGCCGACCAGCATCAGCAGATACTTAG

TGATGGTGGTGATGGCGTAGCCGGTGCCGGGCGTTAAATCGAGATGCTGGAGGATCGCCA

GTTCCAGCAGCGCGGGCAGGTTGCGTACCAGCTGAGTGGTGATGATCAGCACCAGAATGG

CAATCAACACCGCGCCAAGCGTAATAGGCTCAAGGCTTTCCACCCCTTGTACCGTCGAGG

TCACGTCCCACAGCGAGATATTCTCAAGGAAGCCAAACGCCGAGTGAATTTCCGACCACA

GCACGATGACCGATAGCAGCGCGATCAGCATCAGCAGGGAGCGGACAAGCCGCAGCGACT

GGGTACTGATGGCATCGAGGTCGACCTCGCTGACCTCCGTCTCCACCGACCCTTCCGGGC

TGCTGACGTGAACGGGCTCATCTTCGCCGCGGGCGCGCTGAGCGAGAATTTCCGCGCGAC

GATGGCGGGCCCGGTCGAAGGCCAGCCGGCGGCGCTGGATCAGCATCCAGCGGCGGATGA

TGTGATAGACCACCAGCAGCAGGAACCAGATGGCGACCGAGGTTTCCAGACGCGCAAGCA

GCGCCTGGGCGGTGGCGAGGTAGCCGACGGCGGCCGCCAGCATGGCCACCAGCGGGGCGC

CAAGCATCAGGTTCCACAGCAGGCGGTTCACCATATTATCGCCATTCCCCTCTTTATCCA

GATAGAGCGGAATACCGGCGTGCTTAAGGCTCAGGGTGACCACCGCCAGCGCGCCGCAGA

TCAGCAGGAAGCACAGGCGGCCCAGCGAAGCGGAGAATTCGCGGTCGTTAAGATTATCGA

ACATGATCAGCGCCATAATCAGCGGCACAATCAGCCCGATGCTCATCAGGTAGTAGCGCA

TCGCCTTCGCCACGCGGCTACGCGGCCAGCCGAAGTGGGCGATAAACAGCCCGTTTGGCC

GGGCGAAGGTGGCGCAGATCATCACCACCCACAGCAAAGGCACCGTCGCGGTGACTCCAT

CGCCAATCGCCACCGCCAGCGGGAACGGCCAGGCGGACTGCAGACCATAGCCGAGCGTCA

TCCACAGCACCGGCAGCGGCGAGGCCACCAGTATCGACCAGAAGACCGTGCGCAGCGTCA

GCCAGAAGTGATCCTGGGTGACTTTCCCCACCCGGGCGCTGGAGCGCTCGAGAAAGCGGG

TGAAATGGCGCCGCGAACTGATGCTAAAGCCAACCAGCAGCAGGGCGGCAAACAGCGGCA

GCAGGGTCTCTTTGCTGGTAAGCATCATCGCGCTGGCTTTGCCCAGTTCGCTGATGGTAT

CCAGGGAGATCAGGCGCCGCAGATCCTGGACGATCTCCAGCGGCCAGGAGAAGCCGATGG

GGCTGACGTCCGAAGTCCAGAACAGATAGCGGTGGGTGGCTTCGTTGATCTCTTTCAGCG

CGTCTTCCAGCTGGCCGTTGGCGACCTTCAGCTTGGTGAGCTCCAGCATCAGGGTGTCGC

CGCCGCGCAGCAGCGAGTTCAGCAGCTCGTTCTGCGTGCGCAGCTGCGCCTGCAGGATCT

TGTTCTGCTCGCTGGTCAGCGGTTCGCCGTCGGCCTGGCGGATCTGCCGCAGCTGCGGCT

GCTTACTCAGCAAATCTTCAAAGCGCAGACGCTGCACGCGCAGCTGCGCCATTTCCGTAT

CCAGCTGCTGCGGGCGAGGGCGCTCCGGCAGCCGCGCCACCTGGGCGCGCAGGGCTTCGC

CCAGCAGATTGGAGGAGCCCAGCCACTGCGACTGCTCGCGCAGGGTGTTTAACGCCTGGC

GCACCTGCAGCGTTTGATTCGTCGCCTGCCGCTGCTGGGACGCCACCAGATCCATGCGCT

GCGCCTGCTGGTTCAGCGCCTGGGAGAGCTCACGGTTGACCTTAAACTGGGCGGTGATGT

CCGGCGGCAGGTTTTCACTGTTCTCCGCCAGCAGTTCGGTACTCTCCAGCGCCTTTTCCG

CCTCCCGCTGGCGCTGGCTGTTTTGCAGATTGCGCAGCGCCTGCAGATAGGCATCCAGCT

GCTCGCTCTGTTTTTGCGCCAGCTCGGAACGGGCGCGCGACAGCTCCTGGCGGTTGTTGG

CGGAGAGCTGGGCGAGGTCGAGTTCATCCACCAGCGCCTTCAGACGCGCTGATTCCGCCT

GCAGGGCAAGATTTTGCGCCTGGGCGAGAGCATTGTTGCCGGTTTGCGTGCCGATGCGGC

GCTCAACCTCATTGAGCTGACGACGGGCATCGGTTTGCTGCTGCGGCAGCTGGTTCAGGG

AGTCGGCGATTTCACGCGCGCGATCCTGCTCCTGCTGCGCCTGGCGGCTCGATTCCAGCA

GTTGGCTGCTGACCTGCAGGATCTCCTGGTTCAGCGCATCGGCGGTCAGGCCGGTTGGCA

CCTGGCGCGGCTCTTCGCTCAGATTATTGAGCTGGGCACGCAGGCTTTGAAACAGTTTGG

GGAAATTGTCGATAACGTCCTGATACTGACGGGCGCGCTCGAGGGATGATTTTCGCTCCT

CAAGCGCGTTCAGCGCGGACTGCAGAACTTCAACGGTTTCAGGCTGGGCGGGCTTTGCCG

CCTTCGCCTGTTCCAGTTCCTGGGTTATCTGTTTAGCATCCGGGGCTGTCGCAGCGTACG

CCCCGAAACTGAGGCTCAAGGCCAACAGGAAAGTGTATATCAGGCGCACGGCATAACCCT

TTTGCTGAAGAATTAACCTTGATCTTGTTTATCGTCAACCAGCGGGCTGGCGCGGTGTTC

GGCGCGGATCTCTTCTTCCGGTAACGGCGCGGGTTCAGCGGCGGCGGTCGCTTCCACTGC

TGTCGCCAGCGGTTGGCCGATCTTGGTCACGGACAGGCTTTGCAGCGTGTCGACCAGCTT

CACCTGGCCCGGGGCAAACAGGTTGATCACGGTGGAACCCAGTTTGAAGCGGCCCATCTC

CTGGCCTTTCAGCAAGGCGATGGAGCCTTCGTTGTCGCCAGCGGGCCAGGTCCAGCGTTT

AATAATGCCTTCGCGCGGCGGGGTCACGGTGCCGGACCACACGGTCTCAATGCTGCCGAC

GATAGTTGCGCCCACCAGAATTTGCGCCATCGGGCCAAACTCAGTATCAAACAGGCAGAT

GACGCGCTCGTTACGGGCGAACAGGTTCGGGACGTTCTGCGCCGTCAAGTGGTTAACAGA

GAACAGGTCGCCAGGAACGTAGATCATTTCGCGCAGGATGCCGTTGCACGGCATATGTAC

GCGGTGATAGTCGCGCGGCGACAGGTAGGTGGTGGCGAAGCTGCCGTTACGGAACAGGTC

GGCCATCTGATAGTTGCCGGCCAGCAGGGCTTCCAGACTGTAGTCATGACCTTTAGCCTG

CAGGATTTTATCGTTCTCAATGGCGCCAAGCTGGCTGATCACGCCATCGGCCGGCATCAC

CAGCACGTTTGGATCGGTATTCAGCGGGCGAACGTCGTCGCGCAGCGGGCGCACGAAGAA

ATCGTTGAAGGTGCGATAAGCCGCGGTATCCGGCTTCTGCGCCTCTTTCATATCGACCTT

GTAGTATTTCACGAACAGATCGATGACCAGCTTCGTCAGCCAACCTGCGCGTTTGCTCGC

ACCCCAGCCTGCGAGGCGGGTGAGCCACAGTTTAGGCAGAATGTATTGCAGTGAAAGTTT

AAGATCGTTTAACAAAGTAGCCTCCAGGCCATGATATGTCGTTCCTGACCCCGCCTGCGG

GCGGGGACCTGAAAAAAGGGGACGATTCTATACGTAAAACTCGCCAAATGGCATCCGCGT

AAGCTGCGTCATCATCGCTGCCCGGCAGCGCCTGACGTGATGCTCAGCTTAATGATCAGT

CATCGGACGAGGAAAAGTTTTTACGCGTTTTTACCTGTACCTGCGCCATGCTTTCCAGGA

TGCGGTGGTAGTTCTCAAAACGGCTTTCGGCGATCTTGCCGTTCTCTACCGCTTCGCGAA

GCGCACAGCCAGGATCGGTATCGTGTTTACAGTCGCGATATTTGCAACGGCCTAAATAAT

CATGGAATTCGACAAAGCCGTTGGTGATTTGTTCCGCTTCCAGATGCCACAGGCCGAACT

CACGTACCCCCGGTGAATCAATCACATCGCCGCCGTGCGGGAAGTGGTAGAGGCGTGCCG

CGGTGGTGGTGTGTTGACCTAAGCCGGAAACGTCCGAGACATCATTGGTGAGGATCTGAT

CCTCGCTCAACCCGAGCAGGGCGTTCAGCAGGCTCGATTTACCGACCCCGGACTGCCCGG

CGAAGATACTGATGCGGTCGGTCAGGGCCGCTTCCAGCGGCTTAAGGCCGTCCTGAGTCC

GACTGGAAACCAGCAGCACGCGGTAACCGATGTTGCGGTAGATATCCATTTGCTCATTGA

CGAAGCGCAGACCATCATCATCCAGCAGATCGATTTTATTCAGCACAATGAGCGGCTCGA

TATCCTGCGCTTCGCAGGCCACCAGATAGCGATCGATAATATTCAGCGACAGCTCAGGCA

GGATCGCGGAAACCACCACGATCTGGTCGATATTAGCGGCGATAGGCTTCACGCCGTCGT

AAAAATCCGGACGCGTCAGGACGGAGGCGCGATCGTGCACCGCCTCGACGATCCCTTTGA

CGCTTACGCCGTCGGCGGCGTCTTTGCCCGGCCGCCAGACCACGCGGTCGCCGGTGACCA

GCGAGCGGATCGTCCGGCGGATATTGCAGCGATGCACGCTGCCGTCAGCGGATTCGACGT

CGGCATGCATACCAAAGCGACTGATGACAATGCCTTCCGACGTTTCGCCAAACAGGTTGT

CATCGTAGTCGGCCTTCTCCGCAGTGGTTTTCAGACGGCGCTGGTGGTTGGCTTTGACGC

GGCGCTGCTGGCCTTTGGAGAGTTTATTTTTACTCAATCGAACTGGCTCCTGGTCGCCCT

GATGGGGCAAAACCTCTATGATACACGCTATTTTAGATGAATATAGTCACGCGAGAAGGG

TGGAAAATAGCATGAGTGCAAATGAAAACAACCTCATTTGGATCGATCTTGAGATGACAG

GGCTGGATCCGGAGCGCGATCGCATTATCGAAATCGCCACCCTGGTGACCGATGCCAACC

TGAACATTCTGGCTGAGGGCCCGACCATCGCGGTGCATCAGTCGGACGCTCAGTTGGCAT

TAATGGACGAGTGGAATGTGCGGACGCATACCGGCAGCGGTCTGGTGGATCGCGTAAAGG

CCAGCACCGTCAGCGAGCACGATGCCGAACTGGCGACCATTGAGTTTCTTAAGCAGTGGG

TGCCGGCGGGCAAGTCGCCGATCTGCGGCAACAGTATCGGCCAGGATCGTCGCTTCCTGT

TTAAGTACATGCCGCAACTGGAAGCCTATTTCCACTATCGCTATCTGGACGTTAGCACGC

TGAAAGAGCTGGCGCGCCGCTGGAAGCCGGAAATTCTCGACGGCTTTAAAAAGCAGGGCA

CTCATCAGGCGATGGACGATATCCGCGAGTCGGTCGCCGAGCTGGCTTACTACCGCGAAC

ACTTCATTAAGCTGTAAACCGCGACCGGGCCCTGTGCGCGGCCCGGTACACTTTTCTGCG

TTATTTAAACCACTTCTGCTGCATCTGCTGGAAGTCAGGTGTCGCCATGACCGCGGCCAG

GGCATCGTTGATGGCGTTCAGCAGCTCCGGATCGTCTTTGCGCACCGCAATCGCATACTG

CTTACCGTAATAAGCCGGGTCGGTGGCCCGTTCATCCATGATGGCGTAGTCAGGGTTCTC

CTGCTGCCAGGCGTCGAGGGTGGCGAAGTCGCCCATGACGCCGGTTATTTGCCCGGCTTT

CAGCGCGGCCAGGGCGCTGGCGACATCGTCGTAAGGGACAGCCTGTACGGCTTTCTGTTT

ATCACGCAGGTAGCGCTGATGCAGCGTGCCTTTCACCACGCCGACTTTTTTAGCTTTCAG

ATCGGCAAAGGTATGGGCGACATCTTTGTTGACGATCACTACCCCGGAGAGCGCCTGGCG

ATAGGGTCGGCTGAAGGCGACCTGCTTCTCACGCATCGGGATCACTTCTATGCCGGCAAT

CACCGCGTCAAATTTCTTAAAGCGTAAAGCCGGGATCAGGGTATCGAAACGCTGCGCCGT

GAACTGGCACTGCGCCTGCATCTGCTGGCACAGGGCGTGCGCGAGATCGATATCGAAGCC

AACGGGCTGATTTTTGCCGTTGGCGGTGACAAACGGTGGATTGGCCGTGGTGGTGCCAAA

ATGGAGCGTCTCGGCTGACGCGGTTCCGATGGCCAGCGTGCTCAGCAGCAGGACGGTGAG

GACTTTTCTCATGCTAATTCCCTGTTTGGCGTCGGGGTGGCCTCGTTATACGTCGCGCCA

CCGCTGTATGATGCGAGCGATTTTGCGTCATTCAGCCGGGCGGAAAAAGCGATTTTGCCC

GTTATGACGCTTATTTATACAATTCAGCGGCGTAGATGGCGAGAAAATGTCCATTTAAAC

AAAAAACGCAAAAAAGTGATCGTCAGGGGGTTGCAGGGGCATCGAATTCTCGTATAATGC

GCCTCCCGTAACGACGCAGAAATGCAAATTACGACGCCATCGAAATATGGCAAAAAATGC

AGTAACGCGGGAATAGCTCAGTTGGTAGAGCACGACCTTGCCAAGGTCGGGGTCGCGAGT

TCGAGTCTCGTTTCCCGCTCCAAA

>NODE_8_length_10092_cov_201.967499

GCGCCTGGTAAGCAGAGTTTTTGAAATGTAAGGCCTTTGAATAAGACAAAAGGCTGCCTC

ATCGCTAACTTTGCAACAGTGCCAGCTGCCCCCTTAAGAGTTGCATTCACGCGACCCGTT

CTTTGCTGGTCAACCAGCGCTGATGGTCACCAGTTTCCAGTGATCGTCATTACTGACGGC

CTCCCAGCCACAGCTTTTCAGCAGCGCATTAAGCCCCTCGGCGCGCCCGCCAATTCTCGC

AGGCACAGGTAGCACCTGCGTCCCGTCATCATTAAAACCGATATCCAGCGCGCTTTTCAG

CAGACAGATACTGTTCACCGATGCCGATGGCAGAATCTTATTTCGACCGCTCCACTCACT

GTCGCTGAGGACGTGATACCCCCAGTCGTACTGCTTCGCCAGCTCCAGTGCGTAGGTCAG

GCGAAAAAGGTCGTTCTGCTCAGACAGTTCGCCGGTGCAGCTACGCCAGAGATAATCCAG

CTTATGGCGCAGCCGCGCACGAACGCCGAGCGTACGGCCCTGGTTGAGGATCCAGTCAAC

ATCGGTGGCCACGTCACGTGAAAAACGGCGCTGTTTTTTCACCTGCGCAAACCACCGGGT

GATAAACAGGTTTTCCTGCGACTCAGACTCAACCAGGCCATCTTCCCTGGCTGTCAGCAG

GGCGATAAGAGCACACCATGCCAGGTGACCCGTTTTTTCCATATTTCTCATATCATCACC

AGCCCGGGGGCTGTCCTTCAGCAATGATGTTTATCATCCAGTTCCATCAGTCGGCTGTTC

ATCTTGTCGGGATGTTCCCGATATACCTCGCCCCTGATCGGTGCCAGCTGTAGCGTCAGA

TGCCGGGCAACGCTATCGTCCTCACTGTCCGGCGCACCAATCAGCCAGACCGGGTAGGGG

GCATACCTGACGTCATTCCGGAGACGTTCACCCAGAGAGAGCATATCAGCCTCAGACGCG

CACTCCGGGGCAAAAACCAGCCGGGCAGTAATTCGCCCGCAGCGGGAGCAGGGGAACATG

GTGTTCTCAAGGAGCTTCGTGCCGGGAATGGGAGCCGGTGGTGAAGGAATGGTACCATCA

GGTTGCCTGCCGGCGTGCTCAATCAACGCATCAGCCATCTGTTGAGCAACCAGCGCCACA

ATATCTTTGTTCAGTTCCACAGGGTCTTTAACGTACGGGCGCAGCTGCGTGTCGCCGGAT

GGGGTTTCGGTGACAACCACACCACCCACCTCATTGTTACAATAACAAATAACGTATGTG

TTTCCCCGGCGGCGAACCTGAACGTTCGGGGGCAGTCGCAATTTTTGCTGTTCTGGCGAT

GGTGCCATCCGACTTCCCTGCATTAACGGGGTAAATCTGAACCATCGGTTGGACGACAGA

CGGCGTCAGACATGATCTGCTGCTGAATGGTGCCAACGTAACACTGATACAGTTTCCCCT

GATAACGGGCATTAAAAAAATAACTGTTGGGTTCAGGAGTACGATCAGATTGTTCAAGCG

TGACACGATCCTGGGTCACCCCCAGCGCAAAAGCAGCCTTTTCCCGCAGAGCCTTTTCAT

TCATCTGACCTGCAGCCTGAGAGATTCCGCTGATGGAAAGCGACAGAACGCCCAGAATAA

GCAGTGATTTTTTCATGATTACCTTTCCTTTTGATTAATAAGGGCTGTCAGCCATCCCTT

CACAGCAATACAGTAACGGGAAAACGTTCGCTCAGGCAATAATGCTAAGCCTGTCCCTGA

AGAATGTCTGTAATTTGTGCCAGAACCTCACGTACTTCCGCTTTGTCACAGGCCATAAGT

ACATCCATTGAAAGCACCTCCAGTCGTGGCTCTCCCATTTGCTTTGCCAGCAGGCCAGCA

TTAAGTGCCAGCGTTCTCCGCCCCTCTTTTGATGGTTTACGCTGATCATCAATAAACAGG

AACAGCACTTCTTCCCTGACCTCCTCATCCAGCCGGGAAAAGTTTCGGTCACGTAAAATA

TCCAGAGCAAATTTCGTTAAAGAATCCATATATTCTCCTGGTTGTTGAGGTACTGAACAC

CCGAAACTCAAAAAAAGCGGCTTGTCCTTCATCCTTTTTTCGGCCCAAAAGCCCCGGAAT

CCATTAATCCATTAAACATTGTGCGTAACTGCTTAACCGTTAGCTGGTTCAGAAGTAGCG

ACGACCTTGCCCCATGAGGAGACCCGAGAAGCAGGTAACGCATATTTTCCCATGACTCTG

ACAACTGGGCATATGACAGATCCGCCAGCGTCCTGGACAACATTAAAGGAACCGCCACCG

CAGGAGGTATCGTGCCATCAGATTCAAGGGCATGATTATTCCAGCTCCACCAGATTAGCA

CTGGTTTTGCTGTATTCGCATACAGAGGGATCAAGCCCGATACATCAGAAAGAACATCGC

TCCCATCGTAGTCAAAATCACTATTTTTAAACGCGGTAATGAGTTCGTCAGTGATATAAG

AAGCCCGCAACTCGATGGAGTCCGATGCCATACGCAACCATCCGGAAAGGCTACTAAAAC

GCATGTCATCACTGCTCAGATATTGCATTAAATCCCAGTAGGAACGCTTTACAGCAGCGA

TTAGCTCATCAGTATCCCCATAGGGGCATGTAATAATACCGTTAGCCATATAACGCGTAT

GATCAAGGCGCGGAAATGATGGCGTCGTCTGCGTGTCCCTGTAACAGGGTATCGACTTAT

CACGGCCAAGCGCTATAACTGGATGCCATTCAGGATAAGAAGACACTACAGGCCCAAGTT

TCGTGCAAATAACGCTTAAAGCATCCTCAGCTCGTTTCCTGTCAGTTTCAGAGATAGCGT

CGATATTATCCTTTCGCCATGGTGCGATCTCTTTAATAAGAAAGTAATTGATTGCCTCAG

CTTTGAGTTTTTCAGCTTCTTCATTTGCTCGAAACATAACCATACCCCAACATAACATTA

TTAACTTACGCATTATCTATAACACATACGCGTAAGTAAATGGCTTTATGTTTACAATAA

AAAGGTACGGCTACTTTTGCACAATCACCTGCCTGCATGGAGGCAGGTGCGACTGATGAA

CAGGATACTGACGGTCTGTGGTATCGATACCCGGCATAGCCGTAAACACAACTTCTATAT

TCGTATTGTGAATGCCGAGCAGCGCGCAGGCATTCTAGGAATGCGCCAGGGGCGCATAGA

GGCGCCCTCAGAAGTGGACTAGAGCATAGTGGTTAATGGCGCCGTAGCCCGGCGTAGCCG

GTTACGGTGTTGATAGGTTCCACCAATCCATCCCTTCGCCCTGCTAGACCAAAACCCGCT

AAAAGCGATACAGAAGCTTTTGTGCGGCGTCGGAGTGGTCACGACAAGGCGGAAGCCGCA

GTCGGGGCGTATCTCCGCGTTAGCGGGCCGTGAGGGCCGCTTACGGGCGTGTACTCAAAA

CTTCCAGCGACACCACTCATAGCCACTCAGAAATCTAGTTACAACATCCATCATTAAAAG

CGACGTTGTTCCGGGCCTTTGGCCCGGGGCGGCCTCGCTTTTCAGTGGTGGGGAGGGGCT

GTGAGGGTCCAGGCAGGCACTGTTGCTGCTTTTGAGTGAGTATTTTGAATGTTGTAACTA

TATGTATTGTGTCGGGGCCCGTCGCGTAGCGATGGGAGCTACTTAAGGTAGTTGCCGAAC

CGGCGCGGACATAGTCCGCTGCAAGGGCGGGCATTCTCAGGAGCCTGTCCACAGGTCAGG

CGACGAACAGGTTATATATTTATATGAATGAAATAAAAGATATTTAAAAGAAGTACAGAG

CAGGTTTTTAAAGGAAACCACGCACTTTGAAATCAGGTCGGCTGGCGCTCTGTAAGCATA

ACGGTTGTAACCTTATGGAAAGGTCCCTTGCAGTTATCTGTGGGTAACTGAATCTGGCGG

CCAGATGTGGCCACTCTGATGCAATTTCTGGCCGCTTTGATGCCGGAATGGGGTGAATGT

CAGGAATGACGGCCGTCATTTCGTGCAGAAAACCGTCAGTCGGGAGCTGCAGACGTGCGA

AACCCTCCGGCGCCAGCCGGATTTTTCACACAGGAAGGGTTATATGGGGACGGTGGCCAG

CCGCGTGTAGTTGTTATCACGCGACATCAGCATGCGCTCTTTCACGCGCCGCTCCAGCTC

CCGCTTCATGGCATCAAGACCGCCGGTGAACCGCCCGCTGGCGTATTCCCGCGTCAGCTG

TTGCTTCACCAGTGTCACAATGTCCTTACGGGTTCTGTCCGAGTCACGACGTGCACGGGC

GCGTTTCAGGCCATGTAGCTTACGCTCGGACTGGTAACTGCGGAACCGTTCGCGCACAAA

ACGCCAGGCCTTCGCTATCAGCTCGTCCATCTCCAGTGGCTTCAGGTTCTGCTTCTTACG

CTGCTGATTTTCCCATTCGACGCGGCTGCGGCGTGCAGCCACAACAGCCACGTCAGAGAC

ATCGAGCGCCGAGAACAGTGCCGGCGTGAAGGTGATATCTGTCGGTATATTGCAGCCTAT

CTGCGGGTCATACTCGGTCTGGTAGGTAATCAGCCCCAGCTCCGCCATAAACTTCAGTGC

CCGTGTGGCACGGGTGATAGACAGATTGCCACTTTTTGACTCGGTGGCCAGACCGCACTC

GATGGCCAGATTGGTAATAGAGCGCTGTGCACGATTGGCCAGCGGGTCATAGTGGAAGCA

CAACCCCTGGAGCAGCGCATCGATGGCTCGACGACGCAACAACGGCGGCATGCGATGACG

TTTACCCAGCGAGCGAACGAACGCCACATGGACGGAAAAGTCAAAACGGGACGTGAAGCC

CTCAGCTTTCGCCATCAGCTTACGACAGAACGGCAGGGTCTTTTTCCCCTCGCGCGGCGT

GAATACCGGATTCGGGTTTTTGACCTGACGATAATGGGAGAACAGGGTCTGAGCGTCAGT

CACACCTTCCCGCACTTATGTTGCACGGAAGGAGCACTGAGCACAGAAGGTATTGCAGTT

TTCTGAGCATGCACATATACTCCCCGTACAGAGCAACAGCTTCTGTACGGTTTAGTTAGA

GCCCCGGTAATCTTCTTCGTCGCCAAACATAGAAAGATTATCGGGGTTTCGTCTTTTCTG

GTTCCGGGTAGACACCTCATCAGAACCAGTTCCCTGCCACCTTGCGGCGTGGCCAGCCAT

GAAATACATCAGACGATCAGTAATCTAGCACTGAGGTACTTCTTAAGCAACAAATGTGAC

TTGTTACTTTTTTAGTTTACGCAGTTCTTCCTGTTCAAGGAGGAACTCAAATAACTCAGC

CTGAGTCATACCGTACTCGGAGCAAAGAGTATCAAGCGTGTGCTTATTAGCATTCTGAAT

GAATACCGTAACAGCTTTATGCGTATCCTTTTTACGGGATACCGAACGCTGTTTGCGTTC

ACCGGATGACAATGGTTGCCCTTTTCGATAAGGCCTCTTTTCTTTCGATGAGGAAGTTAC

TGCATTTCCGACCTGCGACATATTTGCCTCCTCAAGGATCAAGCAAGGATCGTTTGCAGA

GGATACTACAGATTCGTGAAATCAGCGACTTAACTTTACGCGAAAGAGTGAGCCATGTTG

GCGCATGACTCACCTGAATGGATGTAGATTGCAGATCACATTACGATGCTGATTAGTATG

AAGAATGCCACTCCGTTCCCCCGTCCCAGCGCGACTGCCAGTGCTGAAGGTAGGCTTGCG

CCACTTCCGGCACGTCCTTAATCACCAGCACATTCTCGCTATTTCTCGAGGCCGCAGAGC

GGGTCATATTAAAGCTGCCTGACTCAACCGTATGATTATCAACAATAATGACTTTATCGT

GCATGATGGCGTAGCGACCGTTGGTACGCAGCGGAATACCGGCATTCACCACAACATTCA

TCGCCGACTGGCTGGTTTTGTTCCGGTTCCCTTTCTCATCGAGCACTATCTTCACATCCA

CACCCCGGTGTTTTGCTCTGACAAGTGCGCTAACCACCTCAGGAGACGTAAATGAGTAGC

CCATCAGCCGAATTTCGTGCTGTGCTGACTCAATAGTCTTAAGGACCAGCTGCAGTGCCG

TTCCTTCCGGAGAAAAACCCGTCTCGATGCTGGCGGCATACGCTGCCGGTGCGGGGGCAT

AAAGGGCCAGACCGAGCAGCCCTGCCACCAACCATCTGCAGGTATTTGCTTTGCTGCGAA

CTGCCATAGTTATCCTCATTACATACCGTCCATAAAGTGCGGGGAGAGTATCTGTACGTC

ATTAATCAGCAGCCAGAGGCTCAGGGTCAGCTCTTCCATCAGAACCACAACAGCAACCAG

TGACGTCCACGCCCGCCGATCGCGTTTCAGGAGCTGACAAAACAGCGCCACGCTGGCCAC

AAAAATGCCGACAGTTATCCAGGGAACGAGCTGGTTGATAACCATTGCACTGCTGCTGCA

CTCAAAACATGCCATAGGATTTCCTTCACAGAATTAATTAAGAAACGCCGGGAGCGGGGG

AAACTCGCTTTGCCCCGGTTCCGGGGTTGGACAACGACGCGGAGCGGAGGCGTCAGGACG

TTCTGGTATAACGGAACCAGTAGCAGACAGGCCCGTCGTCGGTATCATGGACTGAGCCCA

GAAACCAGCCGTCATCATCCGGCGGTTCGGGTATCCAGCCCCGTGCGTCCGGCGCTTCAT

CGGTAAATCCGGCAGCAAAAACCTCAGGAGCCTCATCGCGCATGGTCATTACAAAGCACT

GCAGCCCGTGGATCCTCAGCCAGTAGCTGAACTCCGCCGCGGTTTCGCAGCCACTGCGGG

CATACGCCGGATGCGACCAGTACCCCTGCTCATCACGCTCTGCGGTAACAGGCACAATCA

TCCTCTGACCTCCCCCGGCACGGACTGACTGACGGGCGTTTCGGTGTGGCATTCACCTGC

CGTGTTTTCACCGGGCGCCGGTTCGTTCATCATCTGCATCCATCTCTGGCGCTCACCTTC

CGACATCCTCCGGCACAGCCCCGGTGCCAGGACACTCAGCAGGTGCTCAATGTACGCCAG

CCGGCTCAGCGTCAGGGATGCGTCTTCGGACTCCGGGCGCCTTATCGCCTGAGCCACCTC

ACGACACTCAAGAATACCTTTCATGAGCCGCACGCCACCGGCCACGCGCTCCAGCTCTTC

GTAATGATGTATCTGCTCCATCATTCTCATGAAAATGACCTCATCGCTTTCACGGGCACG

CGCTTTTTCACTCATCGCAGTAATGCGCTGATAAACCATCCAGATAAATAACGGCATTGT

TATCAGCGCACATGTTTTCAGGCTGGCCCCCTCCGACTGAACGTTATTTATTGCCAGATA

AGCAAACAGATAAATCAGGCAGCAGACAAATGCCAGCCCGGTATATTTATAAACCCGCAT

AGTTCACCTTTTAAATTTAACCTTTAAGTTCAGACATAAAGCCCACATTGAACCCCCGGA

AAAGTCAATAAACAGAAAAACCAGGAATGGCATTATTTCCCGTGAATTAACGTTATTTAT

CGGAAACTTTAATTAACGCAGTCATCTCTCATTAAGGAGTGAGTTTTATTCTGCGCCGGG

TCAGATGGAGAATGAATTAATACTGCATTGCGCCAGGTAGCTTAACCCGCTTTTTGTTGA

GTGATGGCATCTGACACCCCGGACCCGGCCTCAAGTGCCGTCAGAAAGTCCCGTATCATC

CTCTGCAGCTCCCGGGCATCACGGCTTCGCAGCAGCGGCATGCCCGCCTGGCGCATGACC

TCATCCAGCAGGATGTCACGCCGGCAGCGGCTTTTCTTCAGGTGGGACGCATCGTCCAGC

TCCACGGCCGCCACAACGCGAAACGTCCTGCGGTCAACGATAACCACGTCGCAGTGCCAC

TGGGCCGCCATATGGAAAAGCTTCCACCACGTCCGGCTCCGGCCCCTGACGCGCGGCGTT

ATCTGCACGATATCAGCCACCCTGACCTGCGGGCACAGATACCACCGCCTCATGTCCACC

GACCGGAACAGCCCCTGCATAAAGTGCACCTCACGGTCGGTCATCAGCTGCGCCTGCCGC

TCCCAGAACACGCCGCCCGCCATCAGTTGCTCTGTATCGCCCACCCTGACGCCAGCCTCT

CTCAGCCGCCTGATAAGCGGTGCCTGCGGCCGTTTCTGCTTCAGCACGCGGGAGAGCAGG

AAAATCAGTGCCAGCAACGAAATGATAAATAACACCACACCGGCATTCATGAACCCACGC

TCCCTTCGCTTCGCACGCCCTCGGATAACTGCCCGCCATCACCCGAGAGGGATTTATCCC

GGTCCAGCCCGAACCGTTCAGAGAACAGCCAGCCGCTCAGGATGAGGGTGTTGGCGGGTT

CATCAGGTGCGCAAATCGTAATACTCTCTTCCGTCACGTCTGTGATATCAAAGTTCGCAC

CGCAGAGATGCCGGATAATGTCATCCCGCGAATGAATGCGACCGTCCCCAATCAGTTGCT

TCACCGTCCCTTTAATTATATCCCTTGCTTCTTCATTCACACCGGAGCATTTAATTTCTA

CTGACATACTATTTCCTCTACTGGTTTGAATTTTGTTTATTCTAAAAAGACATACCCACC

TCTCTGGCGGTAACTTCATAACGAAAAATAAAAAGTCAGGCATCACGAACAGGCTTTGTT

TTCCGCAGCCGGACATTACCTGCATCATGTCTGATAATATCTATCTCATTTAATACACGG

CGTAATTCGTCACGCATGAACTCCATTTCATTCCATGAGCCAGAATGCCTTATATATTTA

GTCATGTGGTAAAAAATTGTCGGCAGGAAAGAGGGTTCATAGTCAACCCTGTTTCTCCGG

TAAAGTTTAATGACGGCAAATAGCAATAATATATTTAATATCACCGAAGCAATGACTACG

GTATACATATCTGAGGCTCCGTTATATTGAATACAGAGAAGGACCTTTACCAAACGATGA

AGGAACATTACTTCGTTAAATACCGTTCGGATGTGTTAACCAGAAACGCCGGAGACGGGG

AAAACTTGCTTTTACCCTTCTCCGGGGTTGGACAACTGAGCACGGCGAAGGCGTCAGTCT

CTTTTAGCGGTATCAGGTGGCGGACGCCTGATTATTTTTTGGTATCACCGGCAGCATGAC

TGATGGCCTGCTGCAGGGCCTCCGCGCTGGTGTATCCAGGGATAACCGTCACGTTATCAG

CACTGGCGCCGGCTGACGGGAGAACCACCAGGGCCGGGGTACCGCTGAAGCCCAGCTGCT

GCGCAAGTGTGTTTATGCCATCCAGGGTCCCCTGAACATCTGGGGCTGTTTTCGCATCGA

ACTTCACGGCTTTTGCGGCCGCGCTGATATCAGCATCGGTCAGCTTACCCTCGTTGTGGG

CGGTAGCGTAAATCGCGTTGTGATAGTTAAGGTAAGCATCGGCCCCCTTCTGCTTCCAGA

TCTGAAGCCCGGTTTTCGCCGCACTGAGCGACGCCGGCCAGCGCTGGCCAAATATCGGGA

ATTCCTTGAACACAAAGCGCACGTCCGGGTTAGCTTTTATTACCTTCTCCAGTTCCGGCG

CCAGGCGGGCACAGTAGATGCACTGGTAATCAAAGAATTCAACGACCGTCACTTTCGCAT

CAGCAGGACCATATGATGGTGTGCCTTTATCGTTCAGCAGCGCTGCCTGATTCTGAACCA

CGGCGGCCGTCATCGCCTGCTGCTGCTTCTCCTGCTGTTGGGCCTGCAGCTTCTGGCTGA

CCTCAACCAGCACTTCCGGATGAGCCAGCAGGTAGTCTTTCGCGATTTCACCAATGCGGG

CTTCCTGCTCCGGGGTAAAGGCAACGGCAGGTTTCTCTGCTGCCCCCGCCACGCCGGAGA

CCAGAAGGCCTGCGGCAAGCATGACTGAAAGGGTTTTATTCATGTTCATCCTGTGTTTTT

CTCTTCTCGGTTGTTATCAGTTCGTTCCGTGCACGGGTGGCGACGCTTCTGACCGCCCTG

CGCTGTCGTTTAGCGTGCTCCTGAGCCCTGCGCTCCACGGCATACGCCGCCTCCTCCGCA

CTCACCGCTGCGACCGGTTCACCGGCAAGGTTTTTACGCCACGCGCCCACCGTCATGGCG

CCCAGATACGCAGGCACTGTTGCAAATAGTCGGTGGTGATAAACTTATCATCCCCTTTTG

CTGATGGAGCTGCACATGAACCCATTCAAAGGCCGG

>NODE_14_length_1824_cov_39.222588

GTTAAACTGGATAACCACCATCACGTCCTGCGGGCTGACCGCCATCTCATCGTCTAACCG

CGCGCAGAGCCGACGATAGAGTCCTTGTTTCTGCGCCCAGCTGCGCGGTTTTCCAGCGAA

AATATGAAACAATACGAAGTAATAGCTAACCGAGATATTTTAAACCGGGCAGGGTGCGAG

GGAATATAAACAAAAGAGTAGAGTCAATATTACTATCAAGGCCATCGTTTTATAAGTATA

TTGAAAGGCCAGATGATCATAAGAAATATGTGCCGGAACAATGAATGATCTAATAAAGGA

AGGATCTAATTATGTATTATAGGAATTTCATCATTACCTCAATCGAGGCGGAGCGTATTC

TTGCCATGAAATTTGATGAAGCATTTGCTGGAGTAAAAAAGAATGTTATTGATACACTGA

ATCAAATGGGAAATGGTATAACCCGTGCTTCGTATTATACTTCCTGCTTAATGGATAATT

ATCAGGATGTTTGTTCTAAGTTAAAGCAAGAGGACACAAGATTTATTGCAGGGCTGGCGC

AGTTAGTTAAAAGCCGTGATATCATTTTCCAAATGATTAAAATATATATAGAAACCTACT

TTCAAAATAAAAAAGAAGAAAAAGCTCAATATATTCTCAAGAAGCTTGTCGGCGCGGGAG

TTTACATATCATCTTCAGGATTAACTAATCGTATTTTAATCATGGCAGTAGCAACCATGA

TTTGCCAGACTTCCAGGTTTAATACTGTTGTATATGGGCGTATCAACAGGGCAAGGTCAT

TAGTCCTTAAAGGGAGTGTAACTGCTACCGCAGTGGTATTAAACGTGTATGGATTGATTC

AGGATGCCGCTAATAGCGCTGACAATTTGAAAATGCATAATTCATTTTATTACAATGCGT

TATACGCTAACCATCTGGAGATGATGTACTTTCTCATCGAACCTGTCATCACAGGCGTTC

CTTATTTAAATCCGATGATTATTTCTGATGATGAACTTGCTGAATTACTTATTAAATTAA

TGAGGTGAATGGATGGATTTCTTGAAAAGATGGTTAAAAGAAGAATTCATTCTTTTTTTA

TGGGGATGGGGTATTGTATTATTAATCATTATATTTAGCATGATTGCAGTCTCTCTTTTT

CCTGACATTGCCATTAACTTAATAGGACTTTTTGTTTTATTAATCATTGGGTTTCACGTT

GTCGTTTGGTTTAAAGTTAAAAACTGATATGAAAGAGGAGGGGTAATGTCAAATCCAGCA

TATTTATGGTTAACTGATGAGAATGATTCGCCTATTATAGGTTCTTGCCTGATGCCCACA

CGCACGGGTTCCATCGAATTGCGCGCAGTGAATCATCATGTTTGGTTACCTACCGATAAT

AATACAGGAAAGCTGACGGGAACCCGTCTTCATACACCGGTTAAAATTCAAAAAGAGTTT

GACAGAACAACACCTTTGCTATTTAGGGCTCTTTGTGAAGGTCGAACATTAAGATCGGCA

ACGCTAAAAATGTACAGAATAAATGAGGCGGGACTGGAAGTTGAATATTTTAACATAGCG

ATGGCGAATATTAAGATTACGGCAATCACACCAAATTTACATCCGGCCGGAATGACAAGT

ACTCACCTTGAAGACATTGATTTCCGTTATGAGACGATCACCTGGATATACACAGAAGGG

AACATCATGTATCGTGATTCATGGAACGATCGCTGTTGTGCATGGTAGCAAATGATATAG

TGCTGAAACGCGGCGCCTCTTGCGGCGCCGCCTGTCTCATTCATCCGCCATCTTCCCTGC

GCTAAAACTCCAGTCCTCCAGTTGGTTAAACTGGATAACCACCATCACGTCCTGCGGGCT

GACCGCCATCTCATCGTCTAACCGCGCGCAGAGCCGACGATAGAGTCC

>NODE_16_length_6218_cov_252.733521

GCGCCTGGTAAGCAGAGTTTTTGAAATGTAAGGCCTTTGAATAAGACAAAAGGCTGCCTC

ATCGCTAACTTTGCAACAGTGCCAAGCTGGCTCGTGAATTCGGAATCAGTCGCGAAACCC

TGTATCAATACTTGAGAACGGATCAGTAAATATGCCACGTCGTTCAATCCTGTCCGCCGC

CGAGCGCGAAAGCCTGCTGGCGTTGCCGGACACCAAGGATGAGTTGATCCGTCACTACAC

GTTCAGCGAAACCGACCTCTCCATCATCCGGCAGCGGCGCGGCCCGGCCAACCGGCTGGG

CTTCGCCGTGCAGCTCTGTTACCTGCGCTTTCCTGGTGTCATCCTGGGCGTCGATGAGCC

GCCGTTTCCGCCCTTGTTGAAACTGGTCGCCGACCAGCTCAAGGTCAGCGTCGAAAGCTG

GGACGAATACGGGCAGCGGGAGCAGACCCGGCGCGAGCACCTGGTCGAACTGCAAACGGT

GTTCGGCTTCCAGCCCTTTACCATGGGCCACTACCGGCAGGCCGTCCAGTTGCTGACCGA

GATGGCCTTGCAGACCGACAAGGGCATCGTGCTGGCCAGCACCTTGATCGAGCACCTGCG

GCAGCAGTCGGTCATTCTGCCTGCCCTCAACGCCGTCGAGCGGGCGAGCGCCGAAGCAAT

CACCCGCGCCAACCGGCGCATCTACGATGCCTTGGCCGAACCGCTGTCGGACGCGCATCG

CCGCCGCCTCGACGATCTGCTCAAGCGTCGGGACAACGGCAAAACGACCTGGCTGGCCTG

GCTGCGCCAATCGCCCGTCAAACCGAATTCGCGGCACATGCTGGAACACATCGAACGCCT

CAAAGCGTGGCAGGCGCTCGACCTGCCTTCTGGCATCGAGCGGTCGGTGCACCAGAACCG

CCTGCTCAAGATCGCCCGTGAGGGTGGCCAGATGACGCCCGCCGACCTGGCCAAGTTCGA

GGCGCAGCGACGCTATGCCACCCTGGTGGCGCTTGCCATCGAGGGCATGGCCACCGTCAC

CGACGAAATCATCGACCTGCACGACCGCATCCTGGGCAAGCTGTTCAACGCCGCCAAGAA

CAAGCATCAGCAGCAATTCCAGGCGTCCGGCAAGGCGATCAACGCCAAGGTGCGGCTGTT

CGGCCGCATCGGCCAGGCGCTGATCGAGGCCAAGCAGGCGGGCCGCGATCCGTTCGCCGC

CATCGAGGCCGTCATGTCCTGGGATGCCTTCGCCGAGAGCGTCACCGAAGCGCAGAAGCT

TGCGCAGCCCGAGGACTTCGATTTCCTGCACCGCATCGGCGAAAGCTACGCCACGCTGCG

CCGCTACGCGCCGGAATTCCTTGCCGTGCTCAAGCTGCGGGCCGCTCCCGCCGCGAAGGA

CGTGCTCGACGCCATCGAGGTGCTGCGCGGCATGAACAGCGACAACGCCCGCAAGGTGCC

CGCCGACGCGCCGACCGAGTTCATCAAGCCGCGCTGGCAGAAGCTGGTCATGACCGACAC

CGGCATCGACCGGCGCTACTACGAACTGTGCGCGCTGTCGGAGATGAAGAACGCGTTGCG

TTCCGGCGACATCTGGGTGCAGGGGTCGCGCCAGTTCAAGGACTTCGAGGACTACCTGGT

GCCGCCCGCGAAATTCGCCAGCCTCAAGCAGGCCAGCGAATTGCCGCTGGCCGTGGCCAC

CGACTGCAACCGGTACCTGAACGACCGGCTGACGCTGCTGGAAACACAGCTTGCCACCGT

CAACCGTATGGCGACGGCCAACGAGCTGCCGGACGCCATCATCACCGAGTCAGGCTTGAA

GATCACGCCGCTCGACGCGGCGGTACCCGACACCGCCCAAGCGCTGATCGACCAGACGGC

AATGATCCTGCCGCACGTCAAGATCACCGAACTGCTGCTGGAGGTGGACGAATGGACGGG

CTTCACTCGGCATTTCGCGCATCTGAAATCGGGCGACCCGGCCAAAGACAAGAACCTGTT

GCTGACCACGATCCTCGCCGACGCGATCAACCTGGGCCTGACCAAGATGGCGGAGTCTTG

CCCCGGCACGACCTACGCCAAGCTGGCTTGGCTGCAAGCCTGGCACATCCGCGACGAAAC

CTACGGGGCGGCGCTGGCCGATCTGGTCAACGCACAGTTCCGCCATCCCTTCGCCGAGCA

CTGGGGCGACGGCACCACCTCATCGTCGGACGGCCAGAACTTCCGCACCGGCAGCAAGGC

CGAGAGCACCGGCCACATCAACCCGAAATACGGGAGCAGCCCAGGGCGGACGTTCTACAC

CCACATTTCTGACCAGTACGCGCCATTTCACACCAAGGTCGTGAACGTCGGCGTGCGCGA

TTCGACCTACGTGCTCGACGGCCTGCTGTACCACGAGTCCGACTTGCGGATCGAGGAGCA

TTACACCGACACGGCGGGCTTCACCGATCACGTCTTCGCCCTGATGCACCTCCTGGGCTT

CCGCTTCGCGCCGCGCATCCGCGACCTGGGCGACACCAAGCTCTACATCCCGAAGGGCGA

CGCCGCCTATGACGCGCTGAAACCCATGATCGGCGGCACGCTCAACATCAAGCACGTCCG

CGCCCATTGGGACGAAATCCTGCGGCTGGCCACCTCGATCAAGCAGGGCACGGTGACGGC

CTCCCTGATGCTCCGAAAGCTCGGCAGCTACCCACGCCAGAACGGCCTGGCCGTGGCGCT

CCGCGAGCTGGGCCGCATCGAGCGCACGCTGTTCATCCTGGACTGGCTGCAAAGCGTGGA

ACTGCGCCGCCGCGTGCATGCCGGCCTGAACAAGGGCGAGGCGCGCAATGCGCTGGCCAG

GGCAGTGTTTTTCAACCGCCTGGGTGAAATCCGCGACCGCAGTTTCGAGCAGCAGCGCTA

CCGGGCTAGCGGCCTCAATCTGGTAACGGCTGCCGTCGTGTTGTGGAACACGGTCTATCT

GGAACGGGCTGCGCACGCGCTGCGTGGCAACGGCCATGCCATTGATGACGCGCTGTTGCA

GTACCTGTCGCCGCTCGGTTGGGAGCACATCAACCTCACCGGCGATTACCTCTGGCGCAG

CAGCGCCAAGATCGGCGCGGGCAAGTTCAGGCCGCTACGACCGCTGCAACCGGCTTAGCG

TGCTTTATTTAATGAGATGGTCACTCCCTCCTTCCCAGTACTATGCTGAGGACAGGCTTT

CATTCGGAGAACCATCATGGAAAACATTGCGCTTATTGGTATCGATCTGGGTAAGAACTC

TTTCCATATTCATTGTCAGGATCATCGTGGGAAGGCCGTTTACCGTAAAAAATTCACCCG

ACCAAAGCTAATCGAATTTCTGGCGACATGCCCGGCAACAACCATCGCGATGGAAGCCTG

TGGCGGTTCTCACTTTATGGCACGCAAGCTGGAAGAGTTAGGGCATTTTCCAAAGCTGAT

ATCACCGCAATTTGTCCGCCCATTCGTTAAAAGCAACAAAAATGACTTCGTTGATGCTGA

AGCTATCTGTGAAGCAGCATCACGTCCATCTATGCGTTTCGTGCAGCCCAGAACCGAATC

TCAGCAGGCAATGCGAGCTCTGCATCGTGTCCGTGAATCCCTGGTTCAGGATAAGGTGAA

AACAACTAATCAGATGCATGCTTTTCTGCTGGAATTTGGTATCAGCGTTCCGCGAGGTGC

TGCCGTTATTAGTCGACTGAGTACCCTTCTTGAGGACAGTAGTTTGCCTCTTTATCTCAG

CCAGTTACTGCTGAAATTACAACAGCATTATCACTATCTTGTTGAGCAGATTAAAGATCT

GGAATCTCAGTTGAAACGAAAGTTGGACGAAGATGAGGTTGGACAGCGCTTGCTGAGTAT

TCCCTGCGTTGGAACGCTGACTGCCAGTACTATTTCAACTGAGATTGGCGACGGGAAGCA

GTACGCCAGCAGCCGTGACTTTGCGGCGGCAACAGGGCTGGTACCCCGACAGTACAGCAC

GGGAGGTCGGACGACATTGTTAGGGATTAGCAAGCGGGGCAACAAAAAGATCCGAACTTT

GTTGGTTCAGTGTGCCAGGGTATTCATACAAAAACTGGAACACCAGTCTGGCAAGTTGGC

CGACTGGGTCAGGGAGTTGTTGTGTCGGAAAAGCAACTTTGTCGTCACCTGTGCTCTGGC

AAACAAGCTGGCCAGAATAGCCTGGGCACTGACGGCGCGACAGCAAACTTACGAAGCATA

AAGGCAGAAATACACCAGTTTAAACAATCATTCATCTGGTTTTGCGAATACTGATATTGA

TGATACTAACGGCCCACCGGCCTGTTGAGGAACCTGTAAAACGGAAAGGCTCATTGAAGC

CGTATATTTTCTGGAGGTTCATCAGGCGCGGAACTCATCGAGGCGCGGGAATAAAATCCC

ATTCAGACGCCGGATAGATTCAAGCAAGCCAACTTGTCGTCAAAATCGGTGTTGCAAAAA

CGGGAGTGACCATAGATTCCGTTTTCTGAGGCGACCCCCACATAGAGACCTTCCCGGTCA

TTCACTTTGTAGAGTTTGTCCCTGGGCTTGAGATTGCGCAGCTTGGTATCGGTCAGCATG

TACCTTGTCCTTCTTCGTCTCCGATACCCACTCGATTGTAAACAAGCACACAAAACCCTT

TAGTGACAACAATTTGCAAGAACTATCAGGCTCAGTGCCATGAAAAATACCATGACCAGA

TCATGAGGTTGAACACGGCTTGCGCCGGCAGCGTTCACGCTCCTGGTCGGCGATCTCGCC

CGGCTGCAATGCTAGCTCAGCATCGGTCATGCGCTCCAGCACGTCGCGTAGGCGGATGGT

GCAAGGAATGGGCGGCAGCTCGAACTCATAGCCGCCGGCGATCATTTCGGCCGCAATCTC

CTCGGTGATGAAAAACGGCTCGTCGTCTTGGTTCGGCTTCTTCATGCCCTTTCCTCCTGG

CGCTCATCCTGGCCGACAGCGGCCAGGGCATCGGCTTCCGTCAATGCGTCCTCCACGAAC

GCGCCGTGCTGCTTCGCTTCGGCCTGGCTGACCTCGGCCCATATCCGTTTCACCTGGGCC

GCACTGTACCCGGCCAGCTCGGCGGTCTTGTTGATGCTGTAGCCGGACTTGCGCAGCGCG

ACAACTTGGGCGCGGCGCTTCGGATCAGCACGGCGGCCCTTGTACCGCCCGGCCTGGCGG

GCCAACTCAATGCCTTGGCGCTGGCGTTCGCGCCTGTCCTCGTAGTCGTCGCGGGCCATC

TGCAAGGCCAGGCGAAAAAGCATGATCTGCACGGCTTCCAGCACGATCTTGGCGACGCCC

TGGGCCTCGGCCGCCAGGTCGGATAGATCGACCACGCCAGGGACGGCCAGGCTTGCGCCT

TTGGCCTGTATCGAGGCCACCAGGCGCTCGGCCTCGGGCAAAGGTAGGCGGCTGATGCGG

TCGATCTTCTCGGCAATGACCACCTCGCCGGGCTGTAGGTCGCCGATCATGCGCAGCAGC

TCAGGCCGGTCGGCGCGTGCGCCGGATGCCTTCTCACGGTAGATGCCGGCGACGTAGTAG

CCGGCGGCCTTCGCGGCCGTAGTGATCGCCTCTTGGCGTTCCAAGTCCTGCGCGTCGGTG

CTGACGCGCAGATAGACCCGCGCCACCATCGGCGCGGCTACTGGCTTCGTCCTGCGCATA

CTTGCGGGCTCCTTTGGGCATACGCAAAGTGTCCGGTCATGCTACCCCCGGCCAAAAAGG

CCGTCATGCGATTTATCTTGGCCGGGTCGTTATTGGCGGGTCTAAATGGCCGCTCCGTGG

ATCTCATCGCCAGAAATGGCGATGCGAGATCCAGGGCAGGGCGGCCGCCATCGTCAGACC

TGGCGATGGTCGACGCCGGCGCGCATCGTCGGATGTGGCGATGCGAGCTCGAGGTCGGTG

GCCACCGCCGGCGACCTGGTGCCATCGTCGGCAATGGCGATGCTGCAGCTCGACGTGCGC

GGCCTGGTCGTCTCGGCATCGTCGGATGCGGCGATGCTCGAGCGAGGCGAAAAAAAACCG

CCTCGGGGTGTCCGAGGCGGCAAGTCTGCATGCGGTTCAGGGAGGAAGAAACCGCGCCGG

CGATCAGGGAGGAAAACCGCGCGGCCTGATGTGCAGCTCGGCCACTTTAGCCGGATTTTT

CGACTTATCCGATGCGAGCGGCCCGCCGTGGGCGCTGCTCGATCTGCTGTTGCTTTTTCT

CGACGTGCTTCTGCTCCTGGTGCTGCTGCTCGTCGCGCGGCACTGTTGCAAAGTTAGCGA

TGAGGCAGCCTTTTGTCTTATTCAAAGGCCTTACATTTCAAAAACTCTGCTTACCAGGCG

CA

>NODE_19_length_19218_cov_216.055679

CGGCCTTTGAATGGGTTCATGTGCAGCTCCATCAGCAAAAGGGGATGATAAGTTTATCAC

CACCGACTATTTGCAACAGTGCCGTTGCTCATAATGTTTCTCCGGTGTGACTGGCGGCAT

CCCCTGCCGCCAGCCGGTTAAGTAATCAGTAATCCGCCGCCAGCTCGATCATCAGGTCAG

CACATTCACCATCGGCACGTTCTTCTTCCGCAGTCGTCAGCATGTAACCCCGTTTCGCTG

CCGCCCCCATAAACGCCGGACGGTCTTTCAGTGGCAGTTCTGCCAGGTAATGCATAGCCA

TACCCAGCAGACGGGACTCATAAATCTCGTAGTGCAGGCCACATCCCCGGTTAGCCTGTA

TTTCCATACGGGCCAGCACCACGTCCGCGCGAATAACATCGAACGGGTTACGGGAATGGA

TATTGCGCACAAAGCCATCAGTACGCAGGGACGAGGTTTTCACCCATCTTTCGGAAGATT

CTTTGGTGGCGGTTTTGACGTTGACGTTCTGTGTGTTCATCCTGCTTTTCCTCCTGTCTG

GTGGTTTATCCATCTCTCGGTGAGTTCCCTGGCGGCAAAGGGCAAAGGAGCAACGGCGGG

GCGGCAGGAGAAGGGCGGAGACTAAAGTTTTTGCGGTCCCTCGCAAAAAGTTTTGGCGGA

GTGCATTTCACCCTTCGGATGACGACACGACGGTGCTACGACAAGCCCTCCGCCCGGGGA

CTTAACGGGAGAGGGCTCGCCAGAGGTACGGGGAGAGGATGAACACACCCGACACGGCGG

AACGACGTGGCGTCACCTGAGTGCCGGCGGCTTTATCGCCGGCATGGTGAAAGCGGCGTG

ACCGGAACGGTCACTGCGAGCCGGTGTTGACGTTGCGACAGTGGGATGGAAGCCCGTCAG

GGCGGAGACGGTTTACCGGCTCCGTTTACGACAGCCCCGGTTCCCGTCAGGGAGGTCGCC

CGCAGTCATGGCCAGTGACCCCGTCAGACAGCAGGCAAATTTGAAAAGATGATACAGACA

ACTGCCACCATAATTCGCAGCGTTCGTTCTTCAGAGGTGATTCACAGCAGGAAATTACAA

AGCGTGAGGACCATATAAAAGAGCAGTTATACCGCAGGCATAACCGCTCTTTTTACTTTC

CTGCCTCACGCTGGCGTATAGTTTGTTACCTTCGCCTCCAGTACACCCAGCCACTGACCA

GAAGCAGAACACCGCTCAGCACCGCCAATTTCATCGGGGTTATGATCTCCCCAGAATTCC

AGCTTGTATCCGATACCCCAGATAAAAAACGCCAGACCTGAAGCCACAATTCCCCACTTA

AGGAGAAACAAGAGCACGTTGTCCAGCATACCTGGCGGATCGCGCCAGGTGATAACCAGC

GCAATCAGGGCACAGATTGCCACCCCGGCATAGTACGCCGTGCCTCCCAACATCTCCGGC

GCCGCGTAATGTATGACCAGCGTAAACAGGCCATTTAACAGCGCGACCAGTATCCAGTAT

CTCATCTCTAAATTATCCCTTTTAAGCACCCTGCCGACCGTATTCTGGCAGGATATGATA

TCAGACTCAGTGAGGCGACTTTCCCCGAAAATAATCCGGTCGCACCGTCAGTTCCCGCTC

AATGAGTTCATCTGCAAACAGGGGCGCGATCCTGTTAACACGACGCGCCAGATTCCGTCG

CCGCGTGGCCGCCTTTCGCTCATCGCTCCAGCGCCTGATCGGCCGTTCATACAGAAAATC

AACGCAGACAGCATATCCGGCTCCTGCCACCCACAGTGACATCACGGACTCAGGGGCTGG

CTTCCCGGCCTCCACCACTTCTGACGCCAGTTCAGGTTCACCGGGACAGGGACCGGGACG

CTTCCAGCGCAGCGAGTAACGCCACTTCATACCTGACTCCGCGCTGTCAGCTTGTTGGGT

ACCATCCAGCGCTCCAGCTGCCGGACAGATCCCGGACTTTCCCTTGCCAGCGCATTCGTT

TCAGCCATCACCGTCCAGAAAGGCTGACTCTCCATCGTCCAGCGCTCCATTGGCTCCAGT

GACGGGAAACGCTCGCTCCAGCGCCAGAACATCTCTTCCAGGTCGTACTGGCGCAGTTCA

GTCCCCGACCAGCGTGCGCTCCAGCTGCTGACCGTTTCAGGCGTATGGAATGCCAGCTCA

ATCTCCGCCTGCCCCGCCAGCGCCTGGTACGCCTGCTCACGCTGGCACCGTTCTTTGTGA

CGCTGTCGGGTGTATTTTTCATCCCGCAGGGCGTCCTGACAGCGAACCCGCTCGGTCTGC

TGAAAGGCCACCTCCGGAAAGAGGCGCTGACCCGCACCAACGGGAAGCGGCAGCCAGCAA

CGCGTCCCGCGACTTTCAATCAGCGCATCGATGGCACTGAGCCAGCTGTCCCTGCTGCCC

CGCAGCTCCCGCGCCGTCAGCACCGGCGCAAAATGATGGATTTCCCTGATAGTGATGCGC

GTGCTGCCCGTGAGCCGCCGGAAAAAGGCGCTGGCATACGGATACATCGTGGACACCGCG

CCGCGCGACCGCCGGCGTTCAACCTCCGCGATGGCCTCCATCGCGGCGCGTCGCTCAGGG

CTGAAGGGAACCAGTGACAGGTTTGCAGGTATCATGCCGCGCCCTCCGCTGCCAGAATAC

TGATGATGCTGGCCTGACTGTATCCGTCCGCATCGAGACGCGCCGTCAGGCTGACGGTGT

GGCTGACAAGCTCCGGCTGGTAGCCGCTCAGGGTACGAATGACGGAGAACGGGCGACCGC

TGGCGGGCACGAACACCACCATCCACGCCGGACTGATGGCACCAGGACTGCACACCGCAA

TATGGTAATTGCCGTGCGAGGGGGTAAAGCGTATCTGTACGGGGAAGAAGCCGCCGAACT

CGCTGCGGTACTCGCCGTTCACATCCCAGTTTTCAGGGCAGGACAGGTCACGCATGACGG

CGTGGGTCAGTTCGCGGCGGAAGTCTTCGCCGCTGTCCCGCCAGTCCTCAAACTCATCAC

AGGACATCGTTTTCAGTACATCGGGGGTCAGAATAGTGCGCATGGGTATCTCCTTATCGC

CGCCCCGCAGGGCGGCGCTCCGTTATCAGGCGGCGTGTGCCGTGTTGGTGGTGTCGTTGT

CAGGGCTGTCGGTATCTGAAGCCGCGTCGTCTGCACCGGATTCACCCGCTGACTCCGGTC

CTTTGAGCCATGCCGGAACCCAGCGGGTGTGCTGCATAAAGTGCTCCGCATGCGCTGCAG

CATCGCCCTTCTTCATCTTCTCCGCGTCACCCGCCGCGCCCGTCAGCCCCGCCTCTTTCA

GGGAGGCGACAATCTGCGGATGTTTCAGGCTGCCGAAGTAGTTGTCCTTCGTCGGCTGCC

ACCAGTCGCGCAGGTGGAAGCCGATTGCCGCCTCGACCGCATCGAGGGTACTGCGCGAGG

TGTGCCCCATATCGCGGGTCTGCACCCCGTCAACGGAACAGGCCGTGCAGAAGGCCATCA

GCGACATCAACACCCCGCCGTCAAGGGCAAAGAAGGTGGTGAAGTCCTTCTCCCACCCTT

CCGGCAGCAGGGCTTTCAGCCTTGCCCGTTCGGTCATCAGGATGTTAAACGCTGCGCCAT

CCTTACCGGACGGGGCGTTCTCCGTCAGGCTGCCGTGAGATACAGTGAGGCTGATACGGA

ACGGATGCGTCGTGGTCAGGCAGCCCGAGAAGACGCAGGTACACATGCGCCAGACCATCA

GCGCCACCGCCTTTTCGGGCTGCTGCATCAGCGCCGCCTGGACTGCCAGCGTACGTTCGG

AGGTCATTTTCGTGAGCAGCGGAACACTGATCCCCTCTGCGGCGTCGGGCTGGTGTGAGG

TGAATGGCACCGTTACGCTGCTGGTTACGGTTTCTTCAGGCATATCCGCTTTCAGGCGCA

CACCGCGCTGCACGTACACCTGCCCTTCGTACAGGCTGACCATCACTCCCGCGCCTGACT

TCATGTCGTCAGTCCACGCGCTGGCTTCTGCCGCCGCCTGAATGGCGAGGATGTCCGCTT

CGATCGCATCTGACTCGTCGCAAACGCTGTCATATGTATCGTACTGCTCCCGCAGCGCAC

CAAGACGCTGCTGCTGCTCAGGGGTGTACACCGGATCGGGTTCAGCAGGCTGCACGAACT

CCTTACCGTCTTCGCCGTGGTACCAGATGCGGGCTGCGCGTCCGCGACTCCATGCCCAGC

CCTCCCGCTGCTGAATGTCCTGCGCGATACGCTCCAGCTTTTCCTGCACCAGACGCTCAA

CCAGCACGCTGTCAGCCGTACCGTCGCCCTCGTCCTGGCTGAACAGATCTTCACGGACGT

AACCCCCTGCCGCCTCGTAGGCATCGCGCCCGATAAAACGAAATTTGGCGTTGTCGGTGC

GCATCTCGGTTTCGGTAATAGCGCGTTTAATCAGGTGTGCGGGCGCGTTTGACTAGCTGG

CCTTCACGTTTTCGAATACCTCGACCTGACGGGCAGGATCGTCCTCGAGACAGAGCGCCT

GACACTGCTCAACGGTCAGTTCGTCCTGTGCAAGCTTCTCCATCAGGGAGGGGGCGAGGT

TTGCCAGCTTCAGCATGCGCTGCACGTGACGGGAGCCGAAGCCGAGCGCGTCGCCAGTCT

GCGCGGGGGTTTTGCCCTGCCCTGCCAGCGTACGGAAACCTGCAATCTGCTCGGCGGGAT

GCATGGCGGCGCGCTGCTCGTTCTCGGCGACGGAGGCAAGGGCGGCAATGTCGTCGGAAA

CACGCTTCACCATAACGGTATGGTCAGCAGCGAGACGCCCTTCCTGCGCCAGCAGTTGCA

GGGCAGTTAATCGGCGGCCACCTGCGGCCACGCCGGATTGTCCGTCCGCGAGGGTGTGAA

CAATAAGGTTCTGCAGCAGTCCGAGCGTCTCGATGGAGTCGGCCAGACCGCGAACGCTGT

CCACGGAATAGGGGATGGAGCGCACGTTCAGCGGGGATTTAACGAGATCGGACAGCGGAA

CGTACTCGACCGCAGCGGCCTCAAGGGCGATCTTCAGGGCAGCCTCCTGTGCCTTCGTAA

TTTTTTTGCTGCTCGCTTTTTTGGGTGCTTTTGCTTTAACATCGGTTACTGACATAGTTG

ATACCTCACTGATTGATGATTGTCCGGCCCTGCGGAGTTACCGCTCCGGCAGGGCACCTT

CTTATTTACTGCTGTTTACGAATACCGTAACGTTCGATGTAACGGTTGAGCCATTTCCCG

GTATCCGCTTCAAAATTCCACGCGCGCCAGACCATTACGCCGTTCTGACGAACGACCAGA

CGAAAATGTGTACCCTGATCGTCCTCAATTGCCACGTTGGTGTACTGCGCCGCAACGACC

TCAGCCTGTTCGCGGGTAAAGGTGTCGTCGGGTAAAACCGCCAGCGCCTCGCTCATGTTG

CCCCTCCTTCTGAACCTGTTTTGCTTTTAAAAAACCATCACCCGTTGAGTTGCCGGGGCC

GCGGTTTTGACGTTTTGCGGGGACCTGCTGAACGCCCACGCTGGTTGTTACCTTCACCCG

TTTGAGAGCCGTTCGCCGCAGGGGCGTAAACCAGCGCGGGCGATGGCGGATGTCCGGGGC

GCGGTTTACCGCGTGCCATTTACCCTGGACAGCTGACAGCGGCTGTGCTTGTCTCAGCCC

CGGCGAAAGGACTCAAAAGGGTGAAAAAACCAGGCAAGGAATGAGCAGGAACCCGCCGCA

ACGACGGAAAGCGCGGGCGCGAAACGGCGTTGCCCCTTACAGCCCGGCGGCCGTTGATTT

TCGCCGGGGTGCAGGGAGCGCAGGCCACGGCGCGACAGAGGCGGCGCATCCTGATAAGGA

TGCTGCAAGCCCTGGTGTTGCGTCATGGGATGGAAGCCCGAAGGGCGGAGACGGTTTACC

GGCTCCGTTCACGACAGCCCGCCCGGACGCCCGCAATGAAAACGGGAACGGGCAGAAAAC

AGAAAACGGGAGGATAAGAATGGATTACATGCGGCTAAAATGATGGCTGACGATCATCCA

GCTTGATGCCAGCCGGGAACATCAGGAGCGAAAATGCTTTTCTTTTCTGTACTGCACAAC

GCTATACCAGGCCGAAGCCAGGAAAGCAAAAACGGTGATCAGCACTCTTAATTCGTCCCC

CGGTTCCTTCCCCTTCAGCATCAACATTATGATGATGCCGGCAACGATAATCCATGCAAC

GCCACCTCAGAGACGCAGTTTATCCGCCGCGACATTAATCAGGATAAAAGCAACGGCCAA

GATTCCCCCCCATAGAGCCGGTACAGGCTGAAACGGAATAAACAACAGGTTAATACCGGT

TAAAAGAGTCACGGCCGCAAACATCAGAGACATACGCATAAAATTTCCTCCCTGGACACA

CTGACTATAAGAATCACTTCTGCTGCTCATCTCCGGGTTTATGATATTCGGGCGCATTTG

CGCGCGGCAGCTGCTGACTGTTCTGCCGATGAACGTCAAGCCGTTCACGGAAATACTGGC

GAAGATGTTCAGGCTGTTCCCGTTCAGCCAGCTCCGGCACCACGGGCCTGTTCATCCTTT

CCTGCCAGGCAACGGCAGCGGCGACTTTATCGACCGAGACCTTATCCTGATCTTCTTTTG

AGAAAGAGGCGATATTCCACTTCGACATATGCATCACCGGTCTGCTTTACAGGAAGATAT

CCCTGATAATACGCACATTCCCGGGCAACAGCGACTGACAATGGAGAGGAGAGTGCGCGG

CGCCGCAGGCGCGGCGAAGTTTCTCTCCGGCAGGCGCAGCCTGCCCGGTTTTTCGCGCGG

GCTGACAGGCGCCCTCCGGCCCGGACGCCTGCCATCATACTTACTGGCCTTTTCCACCCT

GTAAGATGAAATGACCGCCGATGTACACGGCACACTGACAGGTCATGTATTCGCAGATTT

CATCCATCACCTGCGCGGTGGTCAGTTCCCGCTGACCGGCATCACGTCGGCGGGCATTAA

TCAGGGCTTTGTACTGTCGCAGGATCTCGCGGGTTTCCGGTGCAAGTTTCATACGTTTTC

TCCTTAACCGGCGGGTTTGCCCGCCGGACATTAATCAGTTGCTGAAGACATAGCCGTCAT

GGAACACATAACCGCTGCTGAACAGGTCACGCGCCCAGGCTTCAAAATCGAAATAGCTGC

GCAACGGCTCCGGCACCTCATTTAACAGGCCGTTGTCCTCCACCATCTCCCGCGCATAGT

CTTCCTCGCTTTCCGCCTCGCCGCGGTACGCATCATCAAACGCGTCATAGTCACATTCGC

CGGTATACTCCGCCCAGGCGATAAAAGCGGCTTCCCTGCCCTCTTCTTCGGCGCGTTTGT

AAGCGGCGATAAAATCCCAGTCAATGGAGCATTCAGAGACGAACTGCGACGGGATACCTT

CCCAGTCCTGAAACATAAACTCGGCATCCCATTCATCGGCATGCAGCGCCTGACAGGCCT

CGTAAAAATCCTCCCTGCCGTCAAATTCCGTCAGATCAAACCATTTGCCGAAAATGCTGC

CGCAGTTGTATTTGTGATACGTGCCCACGTAAACAGCGGGTGTGGTGGTTGTAGTGCGCA

TAAAAAATCCTCCCTAGTCGATGTCGTCTGAGTTCCGGCTTACGCCGTGCCGACACGACA

GCCGGGCGAAAAGCGGAGGATGCAAGGGCGTCACCGAAGCCGCAGCGCAGTAAAAAAGCA

GGAGCAGGCTGGACGGTTTGACGGCGAAAACTGAGCCGGAAAACGACGGGAAGACGGCGG

ATAACGTATGAAATAAACTGCGACCGGGTGAAGGTGACGGCGTTTACGCTTCCCTTGCAT

CAGCCGCGGCCCGGCTACAGTAGAGGCACGGCGTTTGCCGCAGGCCGCACGGGACGTTAC

TCAACGCGAAGCCGGAACAACGTGGAGGAAGAGCCGTAAAAGCGGAGCCGGCGACATCCT

TATCCTTCGTGCCAGATTCAGGGGGCCGCCGCCCCCTGCTGTTCGCTAAACTGGCCGGAT

TGCTGACAGGGCATTGCGGACAAGACTGATTTCTGCACGCGCTTCTGCCATGACCTCATG

TAACAGGGTTAAATCCATCCACCGGCGCGGAGGCTCGCCCGGAATACGCAGCACATCGCA

CATCTGGCCACATGCCAGGATTTGATCCACTTTGTCGCTGATAACAAAGAACTCGACGCT

ACTGTAGCGTGCCCCTTTGTTCAGGATGGCATCGAGCACCACCGGCAAATTGTCATCATC

GTCCAGCCAGCAGGGCATATCATTTTCCTTCACAACCAGACGGAAGTTTCGGGTCTGGCG

ATAAAACAGCGTTTCCCCGCGCGTGTTCAGTGCCGCCTTTATCCGGCGCGCATCCTCCCA

TACCTGCCGGGATACATCCCGCACGGCGCGGGACAGGCAATCCGTTACAGCCTGAATCTC

CGGCTCCGTCAGCCATTCCCCGGCCCAGGGGAAAGCTATCTGTGTTCCGTCCTCCGGAAG

CTGCGGCGCGTCGGCATAGCGGCTGCCGGATAAAATAATCTGCGCTGGCGTCCCGGATAT

TTTTGTCATGGCACTTTGCAGATCTGCGGGTACGTCACCGGTACAAAGCAAAGGCAGCAG

ATGAACAATATTTGCCGCATCCAGACGGACATAAATGCTTATCCAGCCCGGTTTATTGAC

CGGATCACGCTGATCAACATCGGTATGGTCAGGCCATCCATAATCAGCAATCAAATCGCG

CGCACGGCGCATAACAAGGGCGTTTAACGTGGTGGTTTCCTGCATAATGGGTTCCTCTGA

ACGGGGTCAGTACACGCCGCCCGGGCGGCGTGTTGATTTCATTTTTTCAGTAAGGCGCGA

ACTTTCGCCGCATCAGCCAGGCGACGGGTAACGCTTTCCGGGACCGGATGATTGCAGTCA

CGGGCGGTCCATTCTCTGTGCCATAACGCCTGTTCGGCAGTGGTCAGCAGGGTTTCAAGC

AGGTCCGCCGGCACCATCACCGCCGGAACGGCCTCTTTCACCTGTTCAATCAGATCCATC

ACCGCACCGGCAGACACGCCCGACTCAAGCCGTTGTTCCTCCGGAATGGCGTCCATACGC

GCCAGTACCGCCCTTGTGTCCTGCTCCGAAACGGCATATTCCATTCCGTCGGCCAGTGCT

TCGATATCCGCCGGGGACCAGACAATGAGGTTCAAAGGGGTTTCTGCGGGATACTGCTCA

CGCAACAAGCGGCAGAGGGTTTCACAGGTTCCGTACATGTTTTTCTCCTTAGTCCTTAAA

GCAGGCATCCAGCTCAAGCATTTCGTTGTATGCCGCCATAAACAGGGCATTGATGCGAAA

AAGGGTCTGACGGGTCAGGCGTTCGGCCAGCACATCAGAGTCAAAGCGATAGCGGTGCTC

CATCCCGTTCAGCGTCGCCCGCAGGTCACACATGCTGTTGGCGACTTCCGCCACTTCTGC

GCGGAGTTTTTCGTGTCCTGCATAGTTCATTACGCGGCCTCCGGGAACTCGTCGTTAGCG

GCCGGGTACTGCATGGCGCGCCGGACGGCGGCCAGACGCTGCTGTCCGGCCCGGTGATAC

TGCTCAAGCAATTCAATACCGATGTAACGACGGCCAGCCTGGAGGGCGGCCACGCAGGTG

GAGCCACTGCCGGCAAAGGGGTCGAGCACAATCGCGCCGGGATGTGTGAAGGACTCAATC

AACGGTTGCAGGCTGGTTACGGGTTTTTCGGTCGGGTGGTGCCGGTTGCCTGAATATTTC

CACGCAATTACGTCATTCAACGGGTTTTGCGGCAGGGGCGGACGGCCTTTTGCAAGGATG

TAGGCGCATTCGTGGCGATAGCCCACATATGCGGCCTTCGATGTGTAGGTTTTGGTAAAC

ACCAGGTGGCCGACAACGCTGAATCCCGCATTTTTCCAGGCGGCCATAAAGCGATCGACG

CGGTTCCAGCCGTAGAAGCTCACCATCAGCGCGTCTTTTTTCAGCACGCGATACATCTCA

TGGCAGGCGGGTTGCAGCCATTCATCAGTTTTATCGCCGGCGATGGTACGCCCCTGACGG

TCACGAAAACCGACGAGATATGGCGGGTCGGTGAGAATGAAATCGACAGCATTATCCGGA

AAGCCGGACATGATATGGACGCAATTACCCTGGATAAATCGGGACATAGTAGTTCTCCTT

TCTCAAAGCGGCGCCAGTTACGCCGTGCCGATACGACAGCCGGGCGAAAAGTGGAGAATG

CAGGGGCGGTGCCGCAAGCCGCAGCGCAGTGAAAAAGCCCACGCTGGCTGGACGGTTTGA

CGGCGAAAATTGAGACGGAAAACGACGGGAAGACAGCGGGTAAAGCCTTTGAAATAAACT

GCGACCGGGTGAGGACACCGGCAGAGCGAACCCTTGCATTCGAAGCGGCCCGGCTACAGT

AGCGGCACGGCGGCCACACGATGGCAGGAACCTGAAAAACGGCCTATTTTCTGAACTGAT

GAAAACACAGATTTCGCATGCGAAATCTACACCGGAGAAACGATAATGTGCGGTCGGTTT

ACGCAGTACAACTCCCGCGAGGAGTACCTGGCCTTTCTCGGAGAAGAAGCAGAACGGGAC

ATCCCGTATGATCCGGAGCCCGTCGGCCGCTACAACGTTGCGCCCGGAACCCGTGTATTA

CTGCTGAGTGAACGCCGCTCGCAGCTGCATCTTGATCCTGTTCACTGGGGTTATGCGCCG

GAGTGGTGGAACAAGCCCGCTCTCATCAACGCCAGAAGTGAAACTGCGGCCGGCAGCCGG

ATGTTCAGGCCACTCTGGGAGCACGGACGGGCCATTGTTTTTGCTGACGGCTGGTTTGAG

TGGAAACAGCAAAACGGCGTGAAACAGCCGTTTTTCATTTACCGTAAGGACGGAAATCCG

CTCCTGCTCGCTGCCATCGGGAAACCACCTTTTGAGAACGGCAATGACCAGGAAGGATTC

CTGATCGTCACGGCCGCTGCGGATGAGGAACTGCTGGACATTCACGACCGGCGACCACTC

GTGTACTCACCGGATGCCGCACGTAAATGGCTCAGCGAAAACACAACCGGTAAAGAGGCG

GAAGACATTGCCCGTGAGGGCAGTCTTCCCGCCGAAGATTTCACATGGCACCCCGTCAGC

CGGGCTGTTGGCAATCCCGGGAACCAGGGCCGGGAACTTATAGAGCCACTGACTTAGCAG

ACGGTGAGATACCCGGCATCGACTCACAGGGTTATGCACCGTTTCTGTGGATAACCCACT

GCCTGTTTTATCTGCCAGAACAATAACCTGGCAGGAACAGGAAAAATTCTCCTTGCAGGA

CGGGAAATATCTTAAATAACACTGTATGTAAAAACAGGTATTTTAAGAGGTATGCCATGA

TCCTTTTTGTCACTCCCGCATCAGAGCCAGCACTGTCCACCGCACCACTTTTCACAGAGC

GCTGTCCGGCTGGTTTTCCGTCACCGGCCGCGGACTATACCGAAGACGAACTGGATCTGA

ACGCCTACTGTATCCGTCGCCCCAGCGCGACCTACTTTGTCCGGGCCATTGGCGATTCGA

TGAAAGATATGGGCCTGCACTCCGGCGATCTCATGGTTGTCGACAAAGCTGAAAAACCCA

TGCAGGGGGATATTGTCATCGCGGAAACAGATGGCGAATTCACCGTTAAGCGCCTGCAGC

TTAAACCCCGTATCGCCCTGCTGCCGATGAATCCCGCCTACCCCACTCTTTATCCGGAAG

AACTGCAGATATTCGGCGTGGTGATGGCATTCATACATAAGACGCGGGGTACGAATTGAT

GTTCGCTTTGGCTGACGTCAACAGCTTCTACGCCAGCTGTGAGAAAGTATTTCGTCCGGA

CCTGCGTAACAGGCCCGTTGTGGTGCTCAGTAACAATGATGGCTGCGTCATCGCGCGCAG

TGCCGAAGCGAAACGGCTGGGTATTAAAATGGGCGTCCCCTGGTTCCAGCTGAAGACGGC

ACAATTCCCGGAGCCGGTCATCACGTTCTCGTGCAATTACGAGCTCTATGCGTCTATGTC

GAACAGAGTTATGTCTCATCTCGAAGAACTGGCGCCGCGCGTGGAGCAGTACAGCATCGA

CGAGATGTTTCTGGATATCCGCGGTATAGACAGCTGCATCAATTATGAGGACTTCGGCCG

GCAGCTGCGCGAGCACGTGCGCTCCGGTACGGGGCTGACAATCGGCGTCGGGATGGGGCC

GACCAAAACGCTGGCTAAAAGCGCACAATGGGCGTCTAAGGAATGGCGGCAGTTTGGGGG

CGTGCTTGCTCTGACTTCAGGCAATCCAAAGCGAACGGATAAACTGCTCTCACGACAGCC

GGTGGAAGAAATCTGGGGAGTAGGTCGCAGGATCTCAAAAACGCTTAATACGATGGGCAT

CACTACGGCACTGCAGCTGGCGCGCGCGAACCCTGTATTTATCAGGAAGAATTTCAGCGT

TGTGCTGGAGAGAACCGTCCGTGAACTCAACGGAGAAAGCTGTATTTCGCTTGAAGAAGC

GCCGCCGCCAAAACAGCAGATTGTCTGCAGCCGGTCCTTTGGGGAGCGTGTCACGACGTA

TGAAGCCATGCGCCAGGCAGTTTGTCAGTATGCTGAGCGTGCAGCTGAAAAACTGCGCGG

CGAGCGACAGTTCTGCAGGCACATTGCTGTATTTGTGAAGACGTCACCGTTCGCGGTGAA

CGAACCGTATTACGGGAATGTGGCCAGTGAGAAGTTGATGACTCCCACGCAGGATACCAG

GGACATCATAGCCGCAGCGGTGAAAGCACTGGATCGGATCTGGGTGAATGGCCATCGATA

TGCAAAAGCGGGTTGCATGCTCAATGATTTCACTCCTACCGGGGTTTCGCAGTTGAACCT

GTTCGATGATACTCAGCCCCGAAGCAACAGTAATCAGCTGATGAAAGTCATGGACGGTAT

TAACCATTCCGGTCTGGGGAAAGTATGGTTTGCGGGACGAGGTATCGCACCTGAGTGGCA

AATGAAACGGGAGATGCTTTCACCGGCCTATACAACTCGCTGGTCTGAACTGCCAGTAGC

GAAATTATGAGTCACGAAAAGGTTGAAAAACTTGGTGATTTCAGTGTGAAAGAATTTAAA

ATTTTCCTTTACAATCATAATAATAACATTGAAATCGGCATGGTGAAAAACATAAAAAAA

GGATGCTCTCCGGCATCCTTTTCCCTTACTCACTTGACTCAGGAAGTCTTTTCAGAATAC

GTTTTATTGCATCATCAATCTCCGACTGTGCCTCAGCGGAAATGCGGGAAAACTCATAAA

CAACCAGTCGCTTCTTTGAATCAGTTTTCTTTCTGGCAAACTGATTGCGATCTGAAAATT

CTCTCAGCTTCTCAGTTTGAACCGTTCTGGTAGGGCGGGTTGTCAACGATTTGCTCTCAA

CCCTGATAGCCGCCAGAATTTTGCTTTTATCAATTGCCGGATAATCTGGCATGGTCTTCA

ACCGATGTTGAACTTTTTCCATCAGTTCTGTTACGGATGTTTGCTTGTTGTTTGCTTCTT

CAGCCAGTTTTAGCAAAAACTGATAATCCGACAAAGAAATATCATTTATCACCGGGAATA

CTGCAACCATTTCATCTGGCACTGCTGCGGCCTGAAACGCGCGAGTCACTTTCGCCGGAG

AGAGATTCTCTTTCAACGCAATCTCTTCTTTCGTCATGCTAGTTCCATAGGTGACTTCAA

GTCGTTTCCCCAACTCTCGAAGGCTATGTTCTCTAGCTGTCTGGATATCTTGCGCTAACT

GCCGTGCATCGGCGAGTGATATATCATCTTTAGTTACTAGGATTTCGAATTTAACGTTAT

TAAATATGCAGGCGGCACGGCGTCGGGTCCCATCTAATATCTCAATTCGTCCATTAACCT

CCCGTCCAATAGCCGGGAAGAATTGCTGCAGCTTTATCGTCCGGGAAATATCACTAACGG

ACTCACGCGTAAGCATAGCCTGATCTCGTCCATTGACCGATGCATCAACGAACGTCTTTG

ATTCAATCTCTCCGCTTAATACAACCGTTTTGACAAATTTGGCCTGCTTGCCGGATTTAA

GAGTAAACGTTTTGACATCTCCGTCACCTTCAAGCATACGGGCAAACTCTGAATTGCTAT

TACCGAGAACTCGCCCACGAGCTAAAACCTTTTTCATTTAGACTCTCCCCGGATGTATTC

AATGCGGTCAAAAACTGCTTTCGTAAACCGTTCTGCTTCAGTACGTGCCTTTTTCAACGC

TTCAGCACTACCAGGGTATGAAACAGGGTTAGCACTAATAATAGTGTCAAAAGATTCACC

ACATCGTTCGAATCCATCCAAACGTGGCAGTGACGAGTCCAGAATATTACTTGCATACAC

TTCGCGGGCCAGGCTATGCGAAGTTTCGTGATCACGCTTATTAGTCATTTTTGACATGAA

ACCGATACTCGCGCTCAGGCGTGGTTCCACACCTTCGTCTTCAAGACGCTCCAGCATTTC

AGGCAAACGTGTCAGATATTTAAGGGTTGAATGGAAATCAACCTGTGCCGGTGGAGTAGG

GGTCAGAAGCAAATCACTCGCTGCCAGACCATTCAGAAGGAACGGATCAAGATGGGGGCC

AGTATCTATGAAGACAAAATCATAGTCACCAGCGATACGGTCAATAATTGTTTTCCTGAG

GACTTCAGAAGGTTTAAGTCCTGGTAAATGTTCTGCTACTAAAGACTCCCACTGGCTCGC

CACAAAGCCGTCATCAATAGAAGCAGGGATGACATCAACACCAGGAATAATGGTGGGGCG

AATAACTGCTTCTCGCAATGTTTCAACATCGAGATCATTCAGCATTGCCTGAGCAGCTGT

TTCAAGGACTGTACCAATGCTATGGGTGTGATCCAGGAACATAGTACTGGAGGCCTGTGG

GTCGAGGTCTATTACAAGGATGCGAAGATCATGCCGCAGCAGGTCCTGATGTACACGCAA

CGCATGTGCAAGAGTAACTGTACTGACTGTTTTTGATACACCACCTTTAAGGTTTACAAC

GAAAATAACGTAGGGTTCTTTATGGATATCGCGATATTTAGGTATCTGTCGGTGGGCGTA

GATATCGATAACATTCTTTATCGTCAGAGCATATTGTTCGACGTTACCAATCTGCTTTTT

ATTAAATATATAGCCGTCTTCTTCCATTTCTTTCATGGCCAGTTCTACGATACGCCGGCT

CAGCTTTGGTAGTTTTGCGACAGCGTTACGAGTATATGTCTGATGATAATCTGTCAGATT

AAATTCTTTCCTTTGTTCCTCAATATCCCTACTCATAGCCTGAAGTAAAGCGCTTGCTCT

AAGAGCTATGGTACCCACACTACCGTAATCGCGTTTCATTTTTGTCCCCTAAAGATGGAA

TCCTTGCACATTGATGGCGTAGAAGCTCACGCCATTGTACACAATAAATAATAACGTACA

ACATATAATGATACGACATTAAATTATTGTACGTTAATACCTACCTATCACGTAGCTCAA

AAAGACAACTGAGGCTGTACTCAAAGAAAAAACCGTGAGTCTGTTCAGAGCTTGCATCTG

AGCAGGCGAGGGGTTGGACAAGCTCCGTGGGCGCGTCAGCCTGTCACATTGGGGTATGCT

CTATATATACCACCCGAAAAAATACCGGCGAATATTATTGTTACCACATAAGTGATACCA

TCATAAGCAAGACCACTTAAAAGTTACCAGAAGGACAAAATATGTTCGTTTTTGGTTACC

TCCGGGCATCCACTTCAGAGCAGAATGCCAGCCGGGCAAAAAATGCACTGAAGGCATTTG

CAAACCAAAATGGCCACCGTATTGCTGGCTGGTATATCGACAATGTCTCCGGTACGACAA

TGAACCGTCCTGAACTGATCAGGCTTCTTGGTGATGCGGAACCTGGTGATGTGATTCTCA

TTGAACAGGTCGACAGGCTTACTCGACTGGATGATGCAGGCTGGGAGACACTCAGAAAGC

AAATCACCGACAAGCAGCTGGCCATCGTCAGTCTTGATTTACCAACCAGCCATCTGGCGC

TATCCAGCACAGTAAGTGATGACTTCACCCGAAGCATGCTGAAGGCCGTAAATGGCATGA

TGCTGGATATGCTCGCCGCTATTGCCAGAAAAGACTACGAAGACCGTCGACGTCGCCAGG

CAGAGGGAATCTGTAAAGCGAAAACTGAAGGAAAATACCGGGGCAGGGTGGCCGATGCAC

AGAAACATGAACTGATACGTACTCTGCGTCTGGCCCACGGAAAATCACTGCGTGAAACAG

CCCGCCTGGCTGGCGTATCAAAGATGACAGTAATCAGGGTCTGTAACGGCAATCATAAGC

AGGATACTGATTGACGATACTTATTCACGTTAGGTTCAGAACAAACAATTAAGCTTATGG

AGCGAATATGGCTGAAAGAATATCTCAAAGAGAACAGGAGTTGTTGGAGGAATTCCTTTG

TACTGTTCTGGATGATTTCAGTAAAGGCAGTATAACCCACCATCAGGCTGTCAGCGGTAT

CGCGACATTATATACAGCTGCCACAGAAGGACGGAGAGAAGAGGCTTTAGAATATCTGAG

AGAGGGAAGAAAGTTGCTAAGGCAGTAATTGATGATGAGTAAAGATGGTTTAGGAAGGGG

ACCGAACCACCCCGGAACGGTCCCCTGAAGGAATGGCAATTCCGTTCACCGCCAATATTA

GCTTTTCCCGGGCTGTGATAACATCTCCGGGTCATTTTTCAGAGCCCAGGACTGATGAAG

AAGAAACCAGGTACACCCACACCCCATGACGCGACATTTCGCCAGTTCCTGGCGAATCCC

GATGTCGCCCGTGACTTCATGATGTTACATCTCCCGGCTGAATTACGCGCGCTGTGCGAT

TTGACCACGCTGAAGCTGGAGTCCGGTACCTTCGTTGAGGACGACTTACGTCAGTACGTC

AGCGACATTCTCTGGAGCATGAAAACCACCACCGGCGATGACGGGTACATCCATCTGCTT

CTGGAACACCAGAGTTCGGCGGATAAAAATATGGCCTTTCGTCAGCTCAGATATGCTGTC

GCCGCCATGCAACGTCATCTTGAAGCGGGTCATAAAAAACTGCCGCTGGTCATCCCGGTT

CTGTTTTACCACGGCAGCCGGAGTCCGTACCCGTTCTCCACGAACTGGCTGGATTGTTTC

AGTAACCCGGAACAGGCCGGAAAAGTATACACGACAGGATTCCCGCTGGTTGATGTCACC

GTCATCGATGATGATGAGATAATGAACCACAGACGGATGGCCGCACTGACCCTGCTGATG

AAACATATCCGCCAGCGGGACATGATGGAACTGCTGGACAGGCTACCCCGGGTAATGGTG

GAATGGATTTCCCCCGAACAGGTGCGCGTTCTGATAAACTACATGGTAAATGCAGGTGAA

GCGCCTGCACCTGAATTTATGCGGGCGCTGGCAGAGCGTCTGCCGCAACACGAGGATGAA

CTGATGACCATCGCACAACAGCTTGAACAGATTGGCATCGAGAAGGGCCTGCAGCAGGGT

CTGCAGCAGGGCCTGCAGTTAGGTGAACAACGCGGTATTGAAAAAGGCGAGCGCGAAGCC

ACCCTTAAAATTGCACGAACCATGCTGCAGAACGGAATTGACCGCAATACCGTCATGAAA

ATGACCGGTCTGACTGAAGACGAACTAGCGCAGATCCGCCACTAATCCCCCTTTCCTGGC

ACTCCCTGTCCGGCCATCAGAGAATACTGGTGGGGCAGGGAGGCACCAGACTCAGGCTCT

GCCTGCCAGCCACAGCGATTAAACACCTTCATCACCCCCACTACGTTACCCGTCAGACGT

GCTGTAAGCGGATTTATCTGTCGGCCGCTGTCGTCAAAAGCGACATCGAGGTTGGCCCGT

GAGAGATAAATGCCGTTCACGCCCGCACTGAGCGCCACAGCATTTCGGCCTGACCATTCC

CGATCGCTCAGCAGACGGTAGTTCCAGTGCATATCTTTCGCTGTTTCCAGAGCATACGTC

AGCCGGAACAGGTCGTTCTGCTCGGACAACTCGCCGGTGCAGGAACGCCAGAGGTAATTC

AGCTTGCTGGCCAGCTTCGCGCTGACGCCCAGCTGGCGCCTCTGTTTCAACAGCCACTCG

ATGTCCGGATTTATCTCCCGGGGGAAACGCCGTTGCTTCAGCGCAGTCGCCAGCCAGCGG

ATGAGAAAGAGATTTTCCTGTGCCGGCGAGAGAACGCCACCCTCCTGCCTGGCCAGCGCA

AGCGCCACCAGGGCACACCATGCCAGATGGCCCGATTTTTCTGTCAGCGTCACGGCTTCT

CCCGCAAGTCAGAAAAATGATGTAATTCATCCAGCATAATCAGCACACGTCGGCCCGTCT

TACGGGGAAACATTCGCCGCATCTCACGCGTCAGCTGCTTCTTCTCCCATCCGTAAGGGA

AAATAATGTTGTATTCATTTCTCTCAGCGTAAATATCAGGGCCCGCGACGATACGCGCTA

CCTCCTTATTCAGACGTTCGCCTCGCCAGCCATAAGCCGCCAGTCGCTTACGGATACGTG

CAATGGGAAAACGTTTATCGGAGTGACGGGGGAAGAGTAACGTCCCGTCCTCATTTCGTT

TGACGCCAAACATATCCAGAGACTGCTCGATCACCACTGTTCTCGTGGGAAAATGCTCAC

GCATAGTTTTCATCATATTTTCCATTCCAGACTCCTGAATTAATACCTGCAGCTGTCTGA

CCAGCCAGAGAGCAGCGTTATCTCCCTGCGCCATCATTCATTTCACACTGGATCTCACGC

CAGTATCCGGCAATATTGTTTACCACCCGAGCCGTCATAACTGCGTCAGTGACGGCGGAG

TGTGCCTCCCCGGCCCAGCTCAGCCCAGCCTGACTGACAGCGCCGGAAAGCGATATGGTA

CCGTAGCGATTGGTGGGGCCGTAATACCCCGCTGCAAGTCGCATGGCGCAGTACACCGTC

AGAGAGTCCAGCCAGCTGGCACGGTCGTTATGCGCTGCCGCTGTCTGCTTCAGAATGCGC

GTATCAAACTCAGCATTGAAAATAACCAGCGGGCGCCGGCCGATATGGTGCTGCAGCTGC

TGCGCAATATCGGGCCACGATGGCGCACTGACCAGATCATCGTCACTGATGGAAGGTGCG

AACAAGTTCCTGATATGAGATCATCATATTCATCCGGAGCGCATCCCAGAGGGACATCAT

GAGCCATCAACTCACCTTCGCCGATAGTGAATTCAGCACTAAGCGCCGTCAGACCCGAAA

AGAGATTTTCCTCTCCCGCATGGAGCAGATTCTGCCATGGCA

>NODE_25_length_10196_cov_41.414085

GACCTGCGCTACGCCATTGATGCCGCGAAAATTCAGCGCGATCTGGGCTGGGTGCCGCAG

GAGACGTTCGAGAGCGGGATTGAAAAAACCGTGCACTGGTATCTGAACAACCAGACCTGG

TGGCAGCGCGTGCTGGACGGCTCCTATGCCGGTGAGCGCCTTGGCCTGAATAACTAAAAA

GGAAGTAAAGATGAAAGGTATTGTTCTGGCCGGCGGCTCCGGCACGCGTTTATATCCGAT

CACTCAGGGCGTCTCCAAGCAGCTGCTGCCAATCTATGACAAGCCGATGATTTTCTACCC

GGTGTCCGTCCTGATGCTGGCGGGCATTCGCGACATCCTGATCATCTCCACCCCGGACGA

CATGCCTTCCTTCCAGCGCCTGCTGGGTGACGGGTCGCAGTTCGGGGTGAACTTCAGCTA

CGCCATCCAGCCGTCGCCGGACGGCCTGGCGCAGGCCTTTATCATTGGTGAGAAGTTCAT

CGGCAACGATGCCTGCGCCCTGGTGCTGGGGGATAATATCTACTTTGGCCAGAGCTTCGG

TAAAAAACTGGAAGCGGCGGCGGCGAAGACCTCCGGTGCCACGGTGTTTGGTTATCAGGT

GCTGGATCCGGAGCGTTTCGGGGTGGTGGAGTTCGACGATAACTTTAAGGCGCTGTCCAT

CGAGGAGAAACCGCTGAAGCCGAAATCGGACTGGGCGGTGACCGGGCTCTACTTCTACGA

CAACAATGTGGTGGAGATGGCGAAGGACGTCAAGCCTTCTGAACGCGGCGAGCTGGAGAT

CACCACCCTGAACCAGATGTATCTGGAGCGCGGCGATTTGCAGGTGGAACTGCTGGGGCG

CGGATTTGCCTGGCTGGATACGGGCACCCATGACAGCCTGATTGAAGCTTCTCAGTTTAT

TCATACCATTGAGAAGCGCCAGGGGATGAAGGTCGCCTGTCTGGAAGAGATAGCCTACCG

TAATCAGTGGCTGTCGGCGGAAGGGGTGGCGGCTCAGGCGGAGCGTCTGAAGAAAACCGA

GTACGGTGCCTACCTGAAACGTCTGCTCAGTGAAGACTGAAGCCGCACGGCCATTAAAGG

AAAATAACAAGATGAAGATATTACTGATTGGCAAGAATGGTCAGGTGGGCTGGGAGCTGC

AGCGCTCCCTGTCCACGCTCGGTGATGTGGTCGCGGTGGATTACTTTGATAAAGAGCTGT

GCGGCGATCTGACTAATCTGGACGGTATCGCGCAGACCGTGCGTACCGTCCGCCCGGACG

TGGTGGTGAATGCCGCCGCGCACACGGCAGTAGACAAGGCCGAAAGCGAGCGGGAGCTCT

CCGACCTGCTGAACGACAAAGGGGTGGCGGTGCTGGCGGCGGAGTCGGCGAAGCTGGGTG

CCCTGATGGTGCACTATTCCACGGACTATGTGTTCGACGGCGCCGGCAGCCATTATCGCC

GGGAAGATGAGGCAACCGGCCCGCTGAACGTCTACGGTGAAACCAAACGTGCCGGTGAAC

TGGCGCTGGAGCACGGCAACCCGCGTCACCTGATTTTCCGTACCAGCTGGGTGTATGCCA

CCCGCGGCGCCAACTTTGCCAAAACCATGCTCCGCCTGGCGGGTGAGAAAGAGACGCTCT

CCATCATTGACGACCAGCACGGGGCCCCCACCGGCGCAGAGCTGCTGGCAGACTGCACGG

CGACGGCAATCCGTGAAACGCTGCGTGATCCGGCGCTGGCCGGTACCTATCATCTGGTGG

CCAGCGGCGAGACCAGCTGGTGCGACTACGCCCGCTATGTGTTTGAGGTGGCGAGAGCGC

ACGGTGCAGAGCTGGCGGTTCAGGAAGTGAAGGGCATCCCGACGACGGCCTATCCGACGC

CGGCGAAACGTCCACTCAACTCTCGCCTGTCGAATGAAAAATTCCAGCAGGCATTTGGGG

TGACTCTCCCGGACTGGCGTCAGGGTGTGGCTCGCGTGGTAACAGAAGTCCTGGGTAAAT

AAACGGGTAGCAAAAGATGAACATTATTAAAACAGATATTCCTGAGGTGCTGATTTTTGA

ACCGCGCGTGTTTGGTGATGCGCGGGGTTTCTTCTTTGAGAGCTTCAGCAGCAAGGTGTT

TAATGAGGCTGTGGGCCGCCAGGTGGAATTCGTCCAGGACAACCACTCCCAGTCCCAGAA

AGGCGTATTGCGCGGGCTGCACTATCAGCTGGATCCGCACGCTCAGGGCAAACTGGTCCG

CTGCGTGGAAGGTGAGGTATTTGACGTGGCGGTGGATATCCGTCGTTCATCGCCAACCTT

TGGCAAATGGGTGGGCGCGGTGCTCAGCGCAGAGAATAAACGTCAGCTGTGGATCCCGGA

AGGGTTCGCCCACGGGTTTATGGCGCTGAGCGACACGGTGCAGTTTGTCTACAAGGCGAC

GAACTACTACGCGCCACAGTCAGAGCGAAGCATCATCTGGAACGATCCGGAGATAGGGAT

TGACTGGCCGGCGCTGGGCGACTGCGCGCTGTCGCTGTCGGAGAAAGATCTGCAGGCACA

TACTCTTGCCACAGCTGAAGTCTACGCATAAGTATAAATTTGCTTGTTAGATTATGGATA

TCACAAGTGGCTATTTAAAAATAATAATAAAAAATTTATCCTAAAGGTAATCGATTAATG

ACTTATAAAGCAATGAAGCCAAAAGTTATTGCTTCTATTGTATTATTTAATCATTCCTAT

GATGATATTAAAGATACGCTTCTCTCGTTATGCCATGAAGAGAGCGTTGAAAAAATTATC

TTCGTTGATAATGGTGGTTGTCAGTGGGCTGCATCATTGAATGAACCAAAAGTGAGTTAT

ATTAAGTCTCCTCGTAACTGTGGTTTTGGTGCCGGACATAATCTCGCCATCAAAGCAAGT

TCAGATTTTGATGGCTATTTTTTAATATGTAATCCTGATATCAGTTTTGATAAGCAGTCT

CTAGATAAATTAGTATCGTTTGCATGGATAAATGAATATAATTTTGTATCCCCGCAGATC

ATCTATAAGAATGGTGAGCGTCAATATAGTTGCCGCCTGTTGCCAACGCCCAGTAATCTC

TTCTTAAGACGCTTTCTTCCTACCACTGCTATTAAGTATGATGCTACATACGAGTTAAAG

GATGCCGAGTATGATAAGGTATTTTCACCTCCTTCGGTATCTGGCTGTTTTATGCTTTTG

ACGAATGTTCTATTACAAAAGTTGAATGGCTTTGATGAACGCTATTTTATGTACCTGGAA

GATGTAGATCTATGTCGTCGTGCTTTACAACTTACGAAGATCTATTATTGCCCCGAAACA

ACAATTGTTCATGTTTTCAATAAGGGATCTTATAAAAGTAAATTGTTGCTTTGGTATCAT

ATTCGTTCGGCCATTACCTATTTTAATAAGTGGGGATGGTTTTTTGATAAAAAACGATAT

GCTTACAACGAATCAGCATTGCGTAATATCCCAAGAAAGCTAAGTTAATTTATTTGGTAT

TATTTCAGAGCTTAAAATGAAAAATCCACATCAGAAACCGTCATTATCTCCATTAGACAT

AGTTAAGAGTATATATACTCACCGTAGTATTATTTTGCAAATGACTAAGCGAGATGTTAT

CGGCAGATATAAAGGTTCAGTAATGGGAGTTTTATGGTCATTTTTGAATCCTTTATTCAT

GTTGACTGTGTATACCTTTGTTTTTTCGGTGGTATTTAAAGCCAGATGGTCGACTGGAGG

AGATGAAAGCAGAACACAATTTGCAATAATATTATTTGTCGGTATGATCGTCCATGGTTT

TTTTGGTGAGGTAATCAATAGGGCACCACAGATAATATTAAATAATACAAACTATGTAAA

AAAAGTAATATTCCCTTTAGAGACGTTATCTGTCATATCCTTGGTTGCTGCGTTATTCCA

TACTGCTATTAGTCTACTGGTTTTACTAACCGCTTTTGTTATATTTAACGGTTTTATACA

CTGGACAATAATATTTATTCCTTTAGTTTTTCTTCCTCTTGTTATTTTCAGTCTCGGCTT

ATCATGGATTTTGGCTTCTTTAGGCGTATTTTTGAGAGACGTTAGCCAAACTACAGTCAT

CATAACGACGGTTTTGATGTTTTTATCGCCAGTATTTTTCCCTATCAGCGCGCTACCTGA

AAAATATCATATTTGGATCATGCTAAATCCTTTGACATTTATAATTGAGCAGGCTCGGAC

TGTGTTGATTTGGGGGGGGGCACCTAATTTTATGGGTATTTTGCTCTATACTGTTGGAGC

ATCCATTGTCGCCTGGCTTGGCTTTGTGTTTTTCCAGAAAACAAGAAAAGGATTTGCTGA

TGTCCTCTAATCAAATCGCGATAAAGGTAACTAATTTAAGCAAATGCTATCAAATATATT

CCCAGCCATGGGACAGATTGAAGCAATTCTTTGCCCCAAAAATAAAAAGTGTAATTCGCC

GTGAAAGTCGCAGCTATTTTAAAGAGTTTTGGGCGCTACGAGATGTTTCATTTTCGATAA

ATCGTGGCGAAACCGTTGGTATCATTGGGCGAAACGGTGCAGGGAAGTCGACATTATTAC

AAATGATTTGCGGTACGCTTACTCCAACTGTCGGTGACATTGAAGTTAACGGCCGAGTGG

CTGCGTTACTTGAGTTGGGAGCTGGTTTTAACCCAGAGTTTTCGGGCCGCGATAATGTAT

ATCTAAATGGTAGCGTATTAGGTTTAAGTAAGTCGGAAATTGATAAGAAATTTCAAGAGA

TATTAGATTTTGCTGACATTGGTGATTTTATTGATCAACCGGTAAAGACCTATTCCAGTG

GTATGTATGTACGTCTGGCATTTGCTGTTCAGGCATGTATTGATCCCGAAATACTGATTG

TTGATGAAGCATTGGCTGTAGGTGATATTGGTTTTCAATATAAGTGCTTTAAGCGCATGG

AAATGCTTAAACAAAAAGGAACAACCATCATTATGGTCACGCATTCCACAGGTAGCATAT

TAGAATATGCAGATCGCTGCCTTGTAATGAGTGATGGCATGTTAGTCGGTAATACGACTG

ATGTATTGGCTGCCGTTCTTGCCTATGAGAAAGGTATGCTGATGACAGAGCGCACTGATA

CAGCAGAGAAAAAAGAAGCTGTTTCCCAGACGGGGGAAATTGCATCTGCTGATGAATTAT

CAGCAATACAAAATAAGCAAACCAATGCCGAAGTTGATGAAAAACGGTTTGGTAGTGGTC

GAGCTATAATTGAAGATTTCTCAATTATGAAAGCAGATGGCACTCCTCTCTCTGAAAAGC

CACTTGTAAAACCAAATGAAGAAATTTATTTTTCTTTCAAGCTAAACTCATCAGAAAATA

TAAATGATGTAGTCTTAGGCGTTTCACTATCTCGGACCCAAGGCGGGGATATCTGGGGGG

ATAATAATATTTTTGCCGGGCATAAGATTGACTTGGCTCCGGGGCTTCGGAAGCTTAAAT

ATAAAGTTAAGCTACCTATCAATACTGGTGATTATCTCGTTCATTGCGGTTTAGCTTGTT

TTAATAATGGTGAGCGTGAGGAGCTTGATCAGCGACGTCCAATTGCAAAAGTAAAATTTT

GGTCATCCAGAGAACTTGGTGGTGTTATTCATTCTCCTGTAAATGTTATAGAAGGGGATG

AACTATCATGATTGGCATTTATTTACCCGCATTTCCGTTCCGGGGTGTAAAAGCTCCTTA

TTTGTGGTTTTTATATAAAGCCATGACGGCTATTAAAGAGCCGTTGGCATTGATTACGAC

ACAAGATTATTTGTTACCCTGTACAAAGTGGCAGGAAGAGGGGCGCTGGGAGGTTACTGA

TGACGGACAGAAACGTTTAGGCTACGAACTTCCTAATTTTTCAGTTCGCCAAAAAGACAA

CGTCTATATTGTTAATGAAGAATCATTATCTGAAGCATTAACTGAGTGTGGCGATAACAG

TAATCTCCTTTTTAAGAAATTTCTGACGGAAATCATTCCTGATTTTAAAAATGCTCTAAT

CGCTGCATTACAAAAACAAAACGACATTGAATGTATTCTGACCATATGCAATTGTCCATC

ACTGAATGCTGCAGCAGAAAAATATAATATTCCAGTTATAAATCTTGAATTAGGTCCGCT

GCGTTCTCCGACGTATCTTTTTACTGGTTATTTCGATTTTTCTGGTGTCAATGGCAACAC

TGAAGCGGAGAAGAGATACTTTGCTGCTAAACAACAAGGTGTTGTCTTTAATAAAAAAAA

TCGCATTTCAGCGTTACGTGATTTTTTTATTAACAGTCGAAACGATGATGACTACATTGA

ACCAGAATATGATGTTGGTATAGTTTTGCAAGTTGAGAATGATTCCAATATCCTTGCATT

TAGTAATAGTTTCGATAATCAAGCCTTATTGGACTATGCTGAAGGTTCATTTATTGGAAA

AAAAATAGTACGACCGCACCCAGGAAGCCATTTTAGATTAATTGAGAATCCTGGATATGA

AATTGATAATAACAATCTGTCAATCATCGATTTTCTTAAGAAATGTCGAAAAATTCTAAC

TATTAATTCCAGTGTCGGTCTGGAAGCAATGCTAATGAATATTCCTGTGAAGATTTTGGG

GGATTGTTCTTATGCATTTTGTAATGTTGATGATGTTGATGAGCGAGTTGAACGTCTAAC

CTTCTATTTATTTTCTTATCTAGTTCCATTTGATTTGTTATTTAACGCTGAATATATCCG

CTTTCGATTGACCTTTCCATCCGAACATGAAATTTTAAGTAAGCATATCCTATATTATCT

ATCGTCACGAGAAAAACAGAGCATTATTGATATGAAAACATCTACTACAGATGTCGTAGA

AAATGGAATGTATGAGCGAGGTCTCTTGAAAGAGCTCGAAGAGTTGAAGATAAAAAATCT

TGAGTTGAATGATATTGTGAGCCGACTAGAGTTAGAGTTACAGCAAGAGAAATTGTTACA

AGCTGAGAATGATAATAATGACATACTGGTTGATGTTATCGTACCCGTTTATGGTGGTTT

ACAGGAAACTCAGGAATGTATAGAGTCAGCAATATCAACCCTCCCCTCATGGGCTGAATT

AATTGTTATTAATGATGCTTCACCTGAACCTGAATTGACAGATTGGCTACGTAAACGTGC

ACAAGACAATAGTTTCAAGTTACTCGAGAACGAAAATAATTTAGGTTTCGTTGCAACCGT

CAACCGTGGCATGAAACTGCATTCGAAACGGGATGTTCTTCTCTTAAATAGCGATGTTGA

AGTCGCTAATAAATGGCTGGAACGTATCTATGATGCAGCTTATAGTCGTGAGCGTGTAGG

GAGCGTAACTCCATTTTCAAATAATGCGACGATTTGTAGTTTCCCAAATTTCTGTGAAGA

TAATGAATTATTTTCCGGAATGGATGTCCAGTCTCTCGATGATGAATTTGAAACTTATGG

CAAAGAAAATAATCTTGTCGAGATACCAACAGGTGTTGGTTTTTGTATGTACATTCGTCG

TGACTGCTTAAACCAGGTTGGATATTTTGACGAAGAGACTTTCGGTCGTGGTTATGGTGA

GGAAAATGACTGGTGTCAACGTGCTGCAAAAGCCGGTTGGCCTAACTTTCATCAATTGAA

TGTCTTTGTTTATCACAAAGGCGGAGTTAGTTTCGCTGGCGAGCAAAGCCCGCGCAAAAT

ACGCGCGATGGAACTCCTTAATGAATTACATCCAAACTATACCCGTGATGTAATGGAGTT

TATTTCAAGAGATCCTGCTAAGCAAGCTCGCCAGCGAATGCTACTGCGCATTCTGGCGAA

AGCAAATCTTCAGAAAATACTGCTGGTTTCTCATCATATGGGGGGCGGGACAACCTATCA

TCTCGAAGAGTTGTCTAATTTTTACAAAGGAAGAGCATGCTTCTTTATTTTAATGCCTAA

TGCAGACAACAGTAGCGTAGTGATCTCTTTGAGTGCAGACGGACGCACATGCAAAGAAAG

TATCTCTGTTGATATTGAAAATGGCTATGATGATCTGCTGAGATTATTACGCTTTTTGGG

TATATCGCATATCCATTTCCATCATTTGATGGGAATCCCTGAGAAGATCAAAAAACTGCA

TTTAGATTTAAAATGCTCCTATGACGTCACAATTCATGACTACTTTGCAATAAATGGAAA

CCCATCGCTAACCGACAAAAATGGTCTTTTTATTGGCGATAATACAACAAACATGGACGA

ATTATGCGCGGAAACATATCCGTTACCTGTTGGAATGTCAGCTGCCACATGGCGTTCAAA

TATGAATGCGTGGTTATTTGGGGCTGAGCGAGTTATTTTCCCGTCGGCAGATACTAAATT

TCGGTTTACAAGATATTTTCCCGATATTTCTGAGAAGGCTGTCATCGCATGGCATCCTGA

TTACGAAAAAAATGCTCCATATCCTGATGTCAGGAAAACTTACACGGGTGATCGGAAACT

GAAAGTCCTTGTCCTTGGCGCTATCAGTCGTGAAAAGGGCGCTTTCATGCTGGATGAGGT

GGCGCATGCACTTAAAAGAGAAAACATTGAGTTCCATCTTCTTGGCTACGCTTGTAGTAC

GCTAAATGATGCGGTTATTTGCCATGGTGCGTATTCTAATCAGGATTTAGAGAAAAAACT

CAATGATATTGCTCCGGATGTAATGTGGTTCCCTGCGCAATGGCCTGAGACATATAGTTA

TACGTTGAGTGCAGCACTTCAATATGGGTTACCGGTTGTTGTACCAAATATTGGTGCCTT

TGGCGAACGACTCATCGGACGAAAATTTAGCCGGATTATTAATTGGGATATATCTTTCCA

AAGAATGAGTGAGTTATGGCGACAAGCTATTGCAGATTTCGATGGCTTTTTCCAGCAACA

GAATGTTGATCCTATGCCGGATGTTTCGTCAGAAACACGTGTTGATCATTTCTATCAAGA

TTATTATATTCGTGATTCATGGTGGCGTGAAAGCGAGCTTGGCAGAATTGATTTTAAAAC

TTTGATAGATAGTTTCTATTCTTCAGAGAACATCACAATAGCTGAAGAAAAAATATCTCA

ACCTCATGGAAGGAAGGAAAAATTATTGGCTGTATTATGGATGTTGCGGCAAAATCCTGC

ATTATCTTGGGCAACCAAACTTATCCCCTACCGTTTGCAACGATATGTGAAACGACAACT

ATCGCGTCGTGCATTACATGAAATTGTTCGATAAGTATTGGTACCCCAAATTAGGCTAGA

TAGTGTTATATGGCCGGGCATTGTTTCCTTCTCTTGCAAAAGTGAATGAAGAGAGTGACC

TATCGGGCAAGCATTTTGTGCTTGCCCGAGCCTCTATAATTATTTTATTGACACAAAATG

TTATGCTCACTATTCTTTCATGATTCTGCTTAGGGCATGATAGAAACTTGATGAATAATA

ATTTGTGTTATTTTCATTGATACTGAATTTTTTGTGTTCTTTATCGACGCCAAAACTTTC

TGATTTGATTTCTAAATAGTAAGGGCTAATGAATATTGCACCATTGTTATGATGATGTTC

CAATGCATCATAGATGATTTCTTCGTTTTCAACCATAGGGTGCACTTCTGGGATTCCATA

ACTTTCAATTCCAGACTTTTTAACCAGTTAAATATATAGTCACCATAAAATGCTGAACCA

TAGGTATTTAATCTAATGTTATAATGATTATTCTTTTTAAGTGAGTCTTCAACTGCAATT

TTTTCCTCATTCCAGTCTGCATTAAACATTGGCGCTATTTGGTGAGAAAAGGTTCTATCC

CTCCCAATGCATGATGAGCTTACAATATCTGCATATTTTTGTATCTCTCTTGCTACCTCT

TTTTTTCTAAAGTTATAAAATTCCTCGGACAATGGATTGTAATACACTGGTTGTAATGTC

TCAGGATAATCATTCCAGAACTTCATGCTTTTCTCTTCGGGCAACTTTATGCCTTCTCCG

ACACGAACAGGTTTTGTTTGTTGTCGATCTATTACCGGCACATCTATGCTTTTCATCAAT

GTCAATTTCCCATTATCGTCATGGACGACATCTACAACATGAATTCCTTTACTCATCTTT

CGAAAATCAAGATAATATCGATACCCTACAACTGAAGTGCCCAATGTTGGGATGGCCTGA

TATACATCCATTCGACTGAGCCCGCTTTCTGCATACCCCACATCTTTTCCATCTATAAAA

ATCCTGACTTTAGCTGGACCTTGACCGTTTCCTGCTGCCCAACCATATATTGCTAACCTT

CCCGATGAAGCATAATCAAG

>NODE_28_length_28546_cov_33.113186

CAATCACACTAAACAAAGAGTACGGAACCCACTCATGGATATTCGTAAGATTAAAAAACT

GATCGAGCTGGTTGAAGAATCAGGTATCTCCGAACTGGAAATTTCTGAAGGCGAAGAGTC

TGTTCGCATCAGCCGCTCTGCACCGGCCGCAAGCTATCCGGTTATGCAGCAGGCTTATGC

TGCGCCGATGATGCAGCCTCAGGCGCCTGCCGCCGCGACTGCCGCACCAGCTGCTGCGGC

TGAAGCGCCGGCGAAAGCGGAAATCAGTGGTCACATCGTACGTTCCCCGATGGTTGGTAC

TTTCTATCGTACGCCGAGCCCGGACGCGAAAGCGTTTGTGGAAGTTGGCCAGAAAGTTAA

CGTGGGCGACACCCTGTGCATCGTCGAAGCGATGAAAATGATGAACCAGATCGAAGCCGA

CAAAGCCGGCGTGGTGAAAGCCATTCTGATCGAAAGCGGCCAACCGGTAGAATTCGACGA

GCCGCTGGTAGTTATCGAGTAACGAGGCGAACATGCTGGATAAAATTGTCATCGCTAACC

GTGGCGAGATCGCACTGCGCATCCTGCGTGCCTGTAAAGAACTGGGCATCAAGACTGTCG

CTGTGCACTCCACTGCGGATCGCGATCTAAAACACGTATTGTTAGCGGATGAGACGGTCT

GCATCGGTCCGGCTCCGTCCGTAAAAAGCTATCTGAACATTCCGGCCATTATCAGCGCCG

CTGAGATCACTGGCGCGGTAGCGATTCACCCGGGTTATGGCTTCCTCTCTGAGAACGCTA

ATTTTGCTGAGCAGGTTGAGCGTTCCGGTTTCATCTTCATCGGCCCGAAAGCCGACACTA

TCCGCCTGATGGGCGACAAAGTGTCCGCCATCACCGCCATGAAGAAAGCTGGCGTTCCGA

CCGTTCCAGGTTCTGATGGCCCGCTGGGCGACGACATGGACGCTAACCGCGCCCATGCCA

AACGCATCGGCTATCCGGTGATCATCAAAGCCTCCGGCGGCGGCGGCGGTCGCGGTATGC

GCGTTGTACGTAGCGACGCTGAACTGGCGCAATCCATCTCCATGACCAAAGCGGAAGCCA

AAGCGGCTTTCAACAACGACATGGTCTACATGGAGAAATACCTGGAAAACCCACGCCACA

TTGAAATTCAGGTGCTGGCGGATGGTCAGGGTAACGCGATCTATCTGGCTGAACGCGACT

GCTCCATGCAGCGCCGTCATCAGAAAGTGGTCGAAGAAGCGCCGGCGCCGGGCATCACCC

CGGAACTGCGTCGCTACATCGGCGAGCGTTGCGCGAAAGCCTGTGTGGATATCGGCTACC

GCGGGGCGGGTACCTTTGAGTTCCTGTTCGAAAACGGCGAGTTCTACTTCATTGAAATGA

ACACCCGTATCCAGGTAGAGCATCCGGTAACTGAAATGATCACCGGCGTTGACCTGATCA

AAGAGCAGCTGCGTATCGCAGCCGGCCAGCCGCTGTCCATCAAGCAGGATGAAGTGGTAG

TTCGCGGCCATGCGGTGGAATGCCGTATCAACGCCGAAGACCCGAACACCTTCCTGCCGA

GCCCGGGCAAAATCACCCGTTTCCACGCGCCGGGTGGCTTTGGCGTGCGCTGGGAGTCAC

ATATTTACGCCGGTTACACCGTACCGCCGTACTATGACTCCATGATCGGTAAACTGATCT

GCTACGGCGAAAGCCGTGACGTGGCGATTGCCCGCATGAAGAATGCGCTGCAGGAGCTGA

TCATCGATGGCATCAAAACCAACGTCGATCTGCAGATGCGCATTATGAGCGACGAGAATT

TCCAGCATGGTGGCACCAATATCCACTATCTGGAGAAAAAACTCGGCTTGCAGGAAAAAT

AATTCTGCTCTCTCAGCAAAAGGCCGGGTAAACCGGCCTTTTTTCTTTTTCTCTCTCCTC

ATCTATACCATGCGGTACAATCCCCGCTTTCTTCATCCTCAAGGGACAAAAAATGGACAA

ACGCTTTGTTCAGGCCCACAAAGAAGCGCGCTGGGCGCTGTGGCTGACCCTTCTCTACCT

TGCCGCCTGGCTGGCCGCCGCCTATCTGCCGGGGGTGGCTATTGGCTTTACCGGCCTGCC

ACACTGGTTTGAAATGGCCTGCCTGCTGGTACCGCTGCTGTTCATTCTGCTGTGCTGGGC

GATGGTCAAACTGATTTTCCGCGATATTTCTCTGGAGGACGATGATGCAGTTTGAGGTCA

TTATTCCCCTGATCGCCTACCTGGTGGTGGTGTTCGGTTTATCCCTCTACGCCATGAGAA

AACGCGCCTCAGGTAGCTTTCTTAATGAGTACTTTCTCGGCAGCCGCTCGATGGGCGGCT

TCGTGCTGGCCATGACGCTAACCGCCACCTATATCAGCGCCAGCTCATTTATCGGCGGAC

CCGGCGCCGCCTATAAATACGGCCTGGGCTGGGTGCTGCTGGCGATGATCCAGCTCCCCG

CCATCTGGCTGTCGCTGGGCGTGCTGGGGAAAAAATTCGCCATCCTTGCGCGTCGCTATA

ATGCTGTCACCCTCAATGACATGCTGTTTGCTCGCTATCAGAGTCGCCTGCTGGTCTGGC

TGGCCAGCCTGAGTCTGCTGGTGGCCTTTGTCGGCGCCATGACCGTCCAGTTTATCGGCG

GCGCCCGCCTGCTGGAGACGGCTGCCGGTATTCCTTACGATACCGGCCTGCTGATCTTCG

GGGTCAGCATCGCGCTGTATACCGCCTATGGCGGCTTTCGCGCCAGCGTGCTCAACGACA

CGATGCAGGGCATGGTAATGCTGATCGGCACGATCGTGCTGCTGGTGGGCGTGATCCACG

CCGCCGGGGGGGTTGGCCATGCGGTAGAGACGCTGCAGTCGATCGACGTCAAGCTGGTGT

CCCCGCAGGGCGCGGAGGATATCCTCTCGCCAACCTTTATGGCCTCGTTTTGGGTGCTGG

TCTGCTTCGGCGTTATTGGTCTGCCACATACCGCAGTGCGCTGTATCTCCTACAAAGACA

GCAAAGCCGTGCATCGCGGCATCATTATCGGCACCATCGTGGTGGCGATCCTGATGTTTG

GCATGCATCTGGCTGGGGCATTAGGCCGGGCGGTGATCCCCGATTTAACCGTGCCGGATC

TGGTGATCCCGACGCTGATGGTTAAAGTGCTTCCGCCCTTTGCCGCCGGGATCTTCCTTG

CCGCGCCGATGGCGGCGATTATGTCGACGATCAATGCCCAACTTCTGCAAAGTTCCGCTA

CGATCATCAAAGATCTGTACCTGAACTGGCGGCCGGATCAGGCGACTAACGAAAAGCGGC

TTAAACGCATGTCCGCCGGCATCACGCTCCTGCTGGGGGTCTTGTTGCTGCTCGCGGCCT

GGCGGCCGCCGGAGATGATAATCTGGCTGAACCTGCTGGCCTTCGGCGGCCTGGAAGCCG

TCTTCCTGTGGCCGCTGGTGCTGGGCCTTTACTGGGAACGCGCCAACGCGGCTGGCGCGC

TGAGCGCGATGATCGTAGGCGGCGTCCTGTATGCCGTACTGGCCACGCTGAAAGTGCAGT

TTCTGGGCTTTCACCCGATCGTTCCCGCGCTGCTGCTGAGTTTGCTGGCGTTTGTGACGG

GGAACAGTTTCGGTCGTCCCGCCCCACAGTCCCCCATTTTGACTACTGATAAATAAAGAG

TTTTGCTATGCCATGGATCCAACTGAAACTAAATACCACCGGCGCGAACGCTGAAGATCT

TAGCGATGCGCTGATGGAGGCCGGATCGGTCTCGATCACCTTCCAGGATACGCACGATAC

GCCGGTATTTGAGCCATTGCCCGGGGAAACCCGCCTGTGGGGGGATACCGACGTAATCGG

CCTGTTCGATGCTGAAACCGATATGAAAGCGGTCGTTGCCCAACTGGAGCAGCATCCGCT

GCTGGGCGCCGGGTTCGCGCATAAGATCGAGCAGCTGGAAGATAAAGACTGGGAACGGGA

ATGGATGGATAACTTCCACCCCATGCGCTTCGGGGAGCGGCTATGGATCTGCCCAAGCTG

GCGCGATGTTCCGGATGAAAATGCCGTCAACGTGATGCTCGATCCGGGTCTGGCCTTTGG

CACCGGTACGCATCCGACGACATCCTTGTGTCTGCAGTGGCTGGATGGACTCGACCTCAA

CGGAAAAACGGTGATTGATTTCGGCTGCGGCTCCGGCATCCTGGCGATTGCCGCACTGAA

GCTGGGGGCGGCAAAAGCAATCGGGATTGATATCGACCCGCAGGCTATTCAGGCCAGTCG

TGATAACGCGCAGCGTAACGGCGTTTCTGAACGCCTGGAGCTCTATCTTCCTCAGGACCA

ACCGGAGTCGATGAAAGCCGACGTGGTGGTCGCGAATATCCTGGCAGGCCCGTTACGTGA

GCTGGCGCCGTTAATCAGCGTCCTGCCCGTTTCAGGCGGTTTGCTGGGGCTTTCCGGCAT

CCTTGCCAGCCAGGCGGAGAGCGTCTGTGAAGCCTATGCCGATCTCTTCGCCCTTGACCC

GGTGGTCGAGAAGGAAGAGTGGTGCCGGATTACCGGCCGGAAAAACTAAGCGCGATGCGG

CCTACGGGCCGCATTTTTGTTTCCAGTAGCCACCAAATAATGCCAGGAAATGAGAGGCAG

ATCGCACTACAGAGCACTTTTTTGGCTACAAAAACAGCGTTTTATATCGCCATGCGGCCA

GTTTATCCAAGAAAAATCGAGAAGTTTTATGATTTTATAAATGGACACAAATTATCCATC

ATCCATTAAATCAATGATTAATATAAGTATTTATTCATCCCTTTTACGCTAGTCCCGGAT

TCATTGATCTGCAACAGAGGATTGCTCAAAGTTTGGCCTTTCATCTCGTGCAAAAAATGC

GTAATATACGCCGCCTTGCAGTCACAGTATGGTCATTTCTTAACTCATGCGCATCGGACA

CCACCAGCTCAGAAATCGCCTGATCGCAGCGCCCATGGCTGGCATTACTGACAGACCATT

CCGGACGCTGTGCTACGAGATGGGAGCGGGTTTAACCGTTTCCGAGATGATGTCTTCTAA

CCCACAGGTGTGGGAGAGCGACAAGTCCCGTTTACGGATGGTGCATATCGATGAGCCCGG

TATTCGTACCGTGCAAATCGCCGGTAGCGTGCCGGAAGAGATGGCTGCCGCCGCGCGGAT

TAACGTGGAAAGCGGCGCCCAGATTATTGATATCAATATGGGATGCCCGGCGAAAAAGGT

GAATCGCAAGCTTGCAGGTTCAGCCCTCTTGCAGTACCCCGACCAGGTGAAGTCGATCCT

GACGGCGGTCGTTAACGCGGTGGACGTTCCTGTGACTCTCAAGATTCGCACCGGTTGGGA

ACCGGAACACCGTAACTGCGTAGAGATTGCCCAACTGGCCGAAGAGTGTGGCATTCAGGC

TCTGACTATTCACGGACGCACCCGCGCCTGTTTGTTTAACGGAGACGCTGAGTACGACAG

TATTCGGGCAGTTAAGCAGAAAGTTTCCATTCCGATTATCGCGAATGGCGACATTACTGA

CCCGCTTAAAGCCAGAGCTGTGCTCGACTATACAGGGGCTGATGCCCTGATGATAGGCCG

TGCAGCTCAGGGAAGACCCTGGATCTTTCGGGAAATCCAGCATTATCTGGACACTGGAGA

GCTGCTGCCCCCGCTGCCGCTGGCAGAGGTGAAGCGCTTGCTTTGTGCGCACGTTCGGGA

GTTGCATGACTTTTATGGTCAGGCAAAAGGGTACCGAATCGCGCGTAAACACGTCTCCTG

GTATCTTCAGGAACATGCTCCAGATGACCAGTTTCGGCGCACATTCAACGCCATTGAGGA

TGCCAGCGAACAGCTGGAGGCGTTGGAGGCATACTTCGAAAATTTTGCGTAAACAGAAAT

AAAGAGCTGACAGAACTATGTTCGAACAACGCGTAAATTCTGACGTACTGACCGTTTCTA

CCGTTAACTCTCAGGATCAGGTAACTCAAAAGCCCCTGCGTGACTCGGTTAAACAGGCAC

TGAAGAACTATTTTGCTCAACTGAACGGTCAGGATGTGAATGACCTGTATGAGCTGGTAC

TGGCTGAAGTTGAACAGCCCCTGTTGGACATGGTGATGCAATACACCCGTGGTAACCAGA

CCCGCGCTGCTCTGATGATGGGCATCAACCGCGGTACGCTGCGTAAAAAACTGAAAAAAT

ACGGCATGAACTGATACATTTCAGCTATGTTATTGAATAAAAAGGCGCTACTCGGCATGG

GATAGCGCCTTTTTTATTAATGTTTATACAGATGTTTATACAGCTTTGTCTGAACAAACA

AAAAAGCACCAGAACAATACTGGTGCTTTATGGGGGATGAACCTCTTTCAACGCCTTAAT

TTATCGGGCTTTTTCCACTGATAGGGTGGCGCTTCCATCCGCTGGCGGTGCCGCTGTTTA

GCGGCCAAAACCATAGCTGTTTTAGTGCGGATTACCAGCTTATCCTGCCCGTTAAGTTCA

TGGCCCAATTGACGTGCCATTTCGTCGATCACAGATTCAATTTTCTTGTGTTTGAGCATA

TTCAAATCCCGGTAAATTCGGCAAGTCGCTGCTTATGGCTATCGCTCATATCGAATGCAA

AATCCTCGTGCTCTGCCTGGAATGTGCCGAACGCCATAAGCGCAGAAACCGCAGGGTCTA

TCTTGTTAGAGGATTTCTTTTTGTTGGGCTTGATATTGGCGTTGGCGTCGGACTCCATCA

CCACGTTTCCAATCGCCCAGGCCAGAACCGGATCGCCACGATGGCGCACCACCTTGCGGT

TAACAAAAACCTCAAAGGATTTCGCTACCGGACTGAACTTGAGATAGGTTTGCGGGAACG

GCTCCACATCAAGCCCCGCCCCCTGTAGCTGGGTGCGCAGGTGTGTGGCGTTCCACGTAT

CAAAGCCCACCAGCCGGATATTGAATGTTTCAGCGTCGCGCAGGATATCGTCACGGATGC

GGTCATAGTCGATACAGTCGCCGGGGGTGGTGCGTATCCATCCCGCTTTTACCCACTGGC

GATAGATGGCGCGGTTTTTGTTAGCAACGTTAAGTAGCTGCGCTTCGGGCAGATAGTGCC

GGGTAAGAAGCCTGATCTCGCGTTCAAACGGGAAAGCGTAACTCACGCTGGTAATATCGC

TGGTTGAGGACAGGTCAAACCCGGCGTAGCACTCCATTCCGGCCAGATCGTCTTCGGTAT

AGTCGAGCGCACAGGCATCCCATGCGCCGGCCCCCATCCACGGCGTGGAGCCCTGGCACC

AGATATTGAAACGCTTGGTCAGCATCTCCACCCACTGCGACGGAATGCCGCGCGCTTTCT

GGATGGTGGATTCCAGTTTCGCCGCGTCAACGGACACATGCAGGTTAGGGTTAGCCTTGA

TCCACATTTCCGGCTGCTCAACCTCGCTTTCGTCGTCCAGTTCGTAGATCAGGACAAACA

GCGAGTCATTGCTCTCTTCCCCGGCCAGAATCTGACAGCAGTAGTCATAATGCTGTTTAC

AGGCGGAGACAACGTTACTCCCGGCTGTCGTGATGGCGAACAAAATCGCCTCAGGACGTG

CGCCCATACCCAGCTCAAGGGCGGAATAAACGCCGTTATCCGGGTGAAGGTGGTATTCAT

CGACAATCGCCAGGCTGGGGTTAGTCCCTTCAATGGTGGCCGCTTTCGCCGCCAGCGGCT

TTAGCAGGCTGTTGCTCTTCGGGAAAATGACTTTATGCGCCTGAATATTTACGCGCTTTT

TCAGCGGTTTTGACAGCAGGCACATCTGGCGGGCATCGTCGAACACGATTCGGGCCTGAT

CCCGGCTCACCGCCGCCGTGTAGATATCCTGCTGGCCCTTCTCCATTACCAGAAACCAGT

TAGCCAGCATGGCGGCTACGGTGGATTTGGCGTTCTTGCGCGGCACCTCAATAAAAGCGC

TGCTGTACTTACGGCGGCCTGTCTCTCTGACTTTAAAGCCCAGCAGGTTAGCAAAGGCGA

ACTGCTGCCACGGTTCCAGATCAATTGGCTGGCCCCGAAGCGGGCCTTTGACGTGAGGAC

AGAGCCGGGAGAACGCAATAAACCGCTCTACGGTCGCCGTATCGAACTCATAACGAGGGT

CATTCAGGTCGGAAAAGTACCTTTCCACGGCCTGTTTTACGCGCTTACAGGCCGGAATTT

CGCCCTTTTTTATCGCATTTGCGTACTCATTCCAGACGGTCAAGCTCGTCCTCCTCTTCC

GTTTCCACCGGGTTACGGCGACGGCTTACCGGATCAAAGCCCAGCAGCGACGACATTTTA

ATCATGATTTTTTCAGCATCGGCCTTTGCACTCAGTGCCGGATTTCGGCTCTCGCCACCC

TGGCTGTTAACAATGCTGAACCCACGGCTGGCAAGGTCTTCCACGGCTTTGCGGTACATC

GAATAGTTGACGCAAAAAAGCTCAAGGTTGTTCCAGTCGGCGGGTGTCAGATCGCCACGC

TCGGCCAGTTGCTTCGCTTTCGCTTTCCACTGCTGCGCGGCTAACTCATCAAGGTAAGCT

GGCGGTTTTGGTGGTCTTGCCATAAAAATTTCTCGTTTCCATCGCGTTTTATTTTCAAAA

AAATCACCGTGCGTAAAAATTTGAGGGGGCGGGTGGTGCCTGGCGCCCTCGTGTTCGTCC

TGAAAACCTCCCCCACCCCATCGGTGCGGCCTGTCAGCGGTTGCGGAAGCATTCCCGCAA

CTCCCGGTCACGCTCACTCATGCGCTGCACAGGCTGGCGCTCATCGCGTCTGGTGCGGGT

CTGCATGAAGCCATCACGGCATCGGGCCAGCGACTGATACAGATTCACCACGTCTTTCTC

ATTCATGATCAACCTCATACATCCAGTTATTGCGCTGTGCTGCCCGCTCTTCCTGCTCGT

GGTACATCCCCGCTTTGCGGTTGGCTTTGGTGATAGGGTCTTGCTGTGTGGTCTTCTGGT

TATGATGCGTCTGGCATAACGGCTGGTGATTCCACTCAGGCCAGAACAGAACATCATCAC

CGCCGTCGATAGGGATGATGTGATCGACAATCTTTGCAGGAACGTAGAGGCCCAACTTCT

GGCACTCGACACATAGCGGCTGACGTTTCAGATACTGAGCGCGGTACTTCTCCCATGATG

CTGAGTAACCACGGGCGCGACGGTGGCCGCGTCTGGCATCTTCCGCCCGCCAGGCTTCGC

GCTTGTGCTCATAGCACTTACCAGACTTCACCCGCTTATTGCATCCCGGCTCAGTGCACC

GGCGCATTGGTTGCCACGGCATCAGTACACCCCCACATCGCGATACACAGACCACAATGC

AGAGATAGCAAGGGGGATCTCTTTCGCCTCCACATCACTAATCATCGTGCGGTATTCGTA

CAGTTGGGAAACGTACATAAGGCATCCGATCTTGATGGCAGGAGTAAATTCCAGGCCAGC

ACCGAACCGTTTACCGATATGCTTCTGGCAGACTTCCAGTGACGCTTCGATGTATGCCTG

AATCATTGCATCTTCATAGGAATCATCGTTATCGATGCGACAGTGAAGTTTTGCCTCATC

AAGCCCAATTAGTTCACTCACGGCTTAAGCCCTCCCTTACAAAGCAACTCCAGCCTGGTA

GCCTTTTCATCAGGAATTGCCGACTGAATATCAAATGCTTTTGCATCATGTCCTTTCTGT

TTCCAGATGATCCGGCTGGCGCTGGTTACGTCAGAGCGGTAACGTACCCACATACGAAAT

GTAACCTCGGACATTTCAGCACCCGCAGCAATCAGCTCACGGCCACTGATCCCCTTAACT

TCTGCCCAGACTGTCGCAACGTCGTACCATTCCTGAATGACGCCACCAGAAGGGGTTCGG

CTGGTAGTAAAATTCTGAATCGTAACGCGTTGCCTTAATCCTCCCGGCCTCATGACGCAT

CCTCCTTATTCTCAGAACCGGTACTGACCTTCACTTCCTGCTTCCATGCCTGGCTGTATT

CGTCGCCCCCTTCACGCGGCGGCATCCCTTCGCGTTCGCGGGCTTCGTTCGGGTTCATGA

TCCCGTTCTTGATACCGCGCTCATAAGTTGCGTAACGTTCGGTTGGAGTGGCTCGAAGAA

GATCGGCAGAGTCGAACTCCACCTGATAACGAATTCCGGGTACAGGCGATGCCACCAGCA

ACGCGGATTTAATCTGCTGCTCAAAGTTCGCCAGCCACGGGCGCATTGTCATGGTAAGAA

AGGCGCGGCTCGCCTCACTAAAATTGCTGTAGGTGCTGTTGCTGTATTCCTGCAGGAAGA

TGGGAGAAACGTTAAACATGCGGGCAATATCTTCGATGGTGAAGCGCCGGGAGGCCAGCC

ACTCAGCATCCTGATTGCTCATGCCAAGCTGCTTATAGTCCATGCCACCTTCAAGGATCG

GTGTTTTACCGGCATTTCTGGCACCTTTGTAGCGCTCAAGCGCGTCCAGCGCCTGCTTAC

CCTTCACACTATCGAGCCATTCAGCAGTAGTGACTACGCCCGCCGCCATCATGCCATCTT

TCATAATGCTGGCACCGTGGCGCTGCTGGGCCAGACCTAACCCCAGCGCTTCACGGCAGA

TGGTGATCGGCGAGCGCCCCAGAAAACCATCATCGGTCGAGTAACGCAGGTGCAGAATCT

CTTCCTGCAAGTAGGTGCGCACTGCCCCGGTAAACGGCTCAGTAACAGTGTATTTGTACT

TATGCTGGCCGATACGCTCAGGAACAACCTCCCCCGGCGCATACGGATGCAGGGATTCCG

GCTGACCGTCGCGGCCCCACTGGATCACCGCATAGGCGTTACCGTTCAGCAGACAATGGC

GCATCATCGTGCGCTTGAACTGGTAAGGCGTCTGGCAATCGTTAGGTTGCTCATTCAGGA

GAAAATCTACCGGATGATTACTCAACCACTCTCGCGCTTCTCGCCCGTTATCGTTGTGCA

CGCGGTAGAGATAGCAGGGCATTGTTGCCACTGCCTCACTGATAACTGACACGGCATTCA

TCACCGCCGGCAGGGATTCCGCAGTACCGGCAGACACATATTCGCCTGATCCGGTATTTG

GAATCCCTGCCATCGCCAGAAACTCATCAATCGTCATGCTGCGCTGTTCGGATGGCTCAG

ATTTACGGCCAAAAGGCCAGATATTCCACATATCACAGCCCCGCTAAGTCAGCCCAGCGT

CGGCGGTTATCACCAGCACGGCGCAGTTCAGGATGTTGGGAGAACAGAGAACGGTGCGCA

ATTTCCACGCCGGACTCAGGGTAAGCAGGCATAGAAGTAACGGTGATCTCCCGCAGCTCG

GCAGCGGTAACAGTGCGAATATACGGTGTAGGAGTAATATCCCAGGACTCTTTCAGCGCA

CGGAACCCGAAGCTCATGCCGGAAATGTCTCCACGCTCCACCAGCTCCAGCACATCATTG

CCAAGTTGGGTGTTTGGCGGGGTCAGCTCGAAACGCAGCCCGGTATCATCTTCGGACAAC

ACCAGCGTGCCGGATTTGGTACGCCCCAGCAGTTGGGTATAGTTATGCTCGTACAGTGCA

CGCACATCGCTACCGGATGCCAGGCTGTCTTTAAACGCCCCCGGCGCAAACTGCTCGCGG

AACTCATCCCAGATCACCTCTGACAGGCTGTTCCAGCGCACGGCATAGCCCACCAGCTTT

TTGTTGCTGGCGCTCAGTTCGGAGGTACGGATTTCAAAATCGATTGTTTTCATTGTTGGA

CTCCACAAAGGGCAAAAAGGGGCCGAAGCCCCTTAAACGTCAGATCAGGAACCTGAACCG

GAAAGCTCAAGCACCTTGATGGCGTTGGAGTCCACCACACCACCGCCCAGGTATTTATCG

GTATGCACCTTGTAGAAACCAGGTTCGGTGATGTTGTCGGGGCGGGTACGCACGCCAGTA

GTGTGATCCACGATAAAGTAACCGCGCTTAAAGTCCCCGACTGCCAGGAACGCTTCACCC

GCAGCCGCATCAGGCATGGTTTCCAGATATTGAACCGGACGGCCAAGGAGGGTATCGGGA

GAGTCAGCGACGAGACGATCACGCCAGATGTAATCCCCGTTGCCGTTTTTCAGCTTTTGC

AGCGTAGCGGCAGTATTGGAGTTCATCACCCATACGGCATTTTTACGGTATTTGGCTTTC

AGCTTATACAGCAGGTCGATCAAGCCATCAGAGGAAACGGCAGCAGCTTCCATTTTCTCC

AGCGTTCCGAACGGACGGGTTTTATCGCTGGTGGCCGCACGCGGATAGGACAGGAACCCT

TTGGATTTTTTATCACCGTCGCCGTTCACAAAGTCGGTTTCTTCGGTAGCAGTGAAGGTG

TCGGTGATTTCGGAAGACAGCCAACCCAGAATATCAACTTCGGAGAAGTCGAGAATTTCC

TGAGTGGTTTTCGGGTAGGCGTAGATCGGGTTGAGTTTGATATCAACGCGCTCCATCTTA

GGTGTGCTGGTTTCGGTACGCGCTTCGCCTTCGGTGCCGCGCTTAACGGTAGTGCCACCC

ACTGATACCAGCTTCTGGTATTCGTTGGTTTTGGTGGTCTTCACCGTAGCGATGGAGCGC

ATCACGCTGTCATCCTGCAACTGGCGCATGATCTCTTTGTCCAGCTCAGGGATAACGGTA

TAGCCGCCGTCAGCCTGCACCAACGTGGAGAGAGAGCGGGTATCGCCGGTCATGATGTAG

TGGCGCAGCTCATCGTTGCTTACACCTTTACCTTCAACAGAAGTACCAGGCAGATTGCGC

TGATCGTCGGCGACGGCCTCAAGGCGGGTAATTTCAACTTCAAGCGCATCAGCCTGGGCG

CGGAGTTCATCGAACTGCTTGCCCTCTTCATCGTTCAGGCTTCGCTTTTCGCTGTCAGCT

TTTTCCAGCATGGAACGCATCTGGGTTTTGAGTGCGGCTTTCTGCTGGCGTAATTCAAGT

AATTTCTTCATGGAGTGGTTTCCGTAACAATTAACGTTGAGACGTGAAACCAGCGCTTGG

AGGGATGTCCACCTGGAAAGGAAACCGTCGCAGAACGGGAAAAAAACCAGGTGGACAGTG

GCGGCTCACGTCTGAGTGCCACTCTTCAAGATATACATAATAATCAATGAGTAAACACCT

CTATGTTGTCGCAAACAGCAGCGAAAACAGGAGAACAAATAATTTACAAGGTTTGATAAT

ATGAACGGGAAAAACACCACTTCTGGGGGATTTTATGGACTTCGATTTTGACGATATGGC

ATACCCGGATATTTTTTTAATTTCCGGCGAGGAGTTTAAAGGAAGCAGGAACACAGGAAA

AAATCAGGTAGATATCCCGTTTACTGACGAACCGCAAATTGAATTGGGTGATATTCTGAT

TCAGAAGATTGGAAGCCGCGAGTTAAGTCTTAAAGTTGTCGATCTTTCAATATCAAAGAA

CGGAACGCTGAACGCAGGTACAACGCATCCTCACTTACTTACGTTATCCGTAGAGAATCT

TTCTTCCGACGCACACAGGACAGCAAAGAGCATGAATACTTTTAATATTGGCTCCGTCAG

TGGTGAGCAAGTTCAAATAGGTGAAAGTAATCATATGCTGGTGAATATCAGTATTACTGA

ACTTGTCGAGAAAGTAGCTAAATCTGGCGATCCACAGGCTAAATCAATGTTGAAACAGTT

ACTGGAAAATAGCACCGTTGCCAGTATCGTTGGCGCTGGCGCTTCTGCGCTGTTAGGTCT

GCTTTAAAATATGGCCTGGGAAAAAACCAGGCCTTTAGCTTATATGGCTGGATGATTATT

CTTTATCCAGCCCCCACTGATAGAAAGCCCAGCTTGCTGTTGATTGTGCGCTATGGATAG

CGTTCTCAAGGCCAGAGGTTGGGTACGACAAATCAGCCGCAATCCTCTGTAGAAGATCGA

GGTAAGCGCTGGCGTCTTTCGACAACTCTTGCCCCCCTTCTTCCAGCCCAGACTGGTACG

ATTCCAGATCAAGTTTTTCAGAAGTGACAAAAGCGCTCAGAGCCAGAAAATCCGTCACCG

TAATCTCATCTTTATTTGAAAGCTCATCAACGGCGCTGTAGAGAAACTTGAGATCGCTCA

TATGCCCGTTATCTTTGCCAATCAGTTTCATTAATGACCTCTTTATTTTTCACGTATATA

TACAAAACTATGTTGGTTCAGTCAGTTCAGTTGGTTCAATTTGTAAAGATTATTGTTTTA

TAAGGATTATTTTTCGATGAGTGAACCAACAAAGCCCCGATTTGAACCAACATTGGGTAT

TTTCATGTTGGTTCAGTCCATGAGGTTCTAAAATGTTGGTTCAAACTGCCCGTTTGTTGG

TTCAAAACTGCTATTTGTTGGTTCAGTGTTGGTTCATTTTTTTGACATTAAACCCATATA

AAACAGCCATATGAACATAACCAATAGACACTGAACCAACTGAACCAACATTAACAACCC

TCACATGTGTAATTTATTCTTCTCCACCTTCCGCAACCTGGTGAAGCACATAAACGTTGA

TTTGACGCCCATCAATACGCGGGGATTTCTGCTGGTATCCACGCCCGCTGGACGGCTCAG

AAAGCAAGCCAGCAGCGGCAAGCACGCGGGCAAACTGCCTGGCGTTAAAGCCCTGAGCTA

TCTCCTTCTCAAACGTTGCGGGGAACGTATAGAACACCAGCGGCGCATCATCATGGCTGC

TTTTGCGCTTTCGATACCCGGCCAGATCGCGAATCGGCATACTGGAGGGATCATAGGGCA

ACGGTGCAAAGCGGCTTAAACCGTAGGCATTCAGGAACGCCTCGCACTGCTCGATGATCT

GCTGGTGCTCTTTGTTACCAGTGCCGAACTCTTTCACCCAGGCGTTAAAGCTATGCTGGA

TAGCGTCACGGCTGGCCTGTTCACTCCATCCGGTGATTGATGCACCAGTTACCAGCGCGG

CTTCGAGGATTGCAAAGCGTTCGGCCACGCGGTGTACCTGCTCACCGTAATCCGCCGGGA

TGAGGCCGCGCCAGCGCGTTTGCGCGTCACGTACCGCCTGTTTAGCCTCCTGCTGGTTAG

CTGCCAGCCATTTAACCCACTCACGCCCCGCCGCCCCGTGGTTATCAATCCAGGCTTCTT

TCAATGCGTCAGCATGAGCCTTGCCGTTTGGCAGACCGTTAAAGGCCGTCGATTTCTCCA

TAGGGATGTTGAGCAAGCGCACCAGTTGGCCCGCTTTCACTTTCAGCCCACCAGCAGCCA

GGAAGGTTTCAATATCCATTTCCCCGGTACTGATCGCCACAGTGCGCCAGCGTTTAAGCT

CCCGATTGCCGCCCTCTTTGGCTCCCTGCAACTTTCCGGCGCCGTTAAACAGGGTGTAAG

CAGACGTGGCAACATCTTTGGCACTGCTGCCCTGTCCTACCTCATCAAGCGGTAACAGGC

TGTCGTTATGCGCCTCCGCTTCGTTTGCTATGCCAAGCGCAGTACCGTACCAGGTAAGCC

GCAACGCATCAGGCTCACCCCACAGGCTGCTCGCAATATTGGCGGTAGTGGTCTTACCGG

CGCTCGACTGCTCGAACAAATGGACGCCGAAACCATCAGCACCCACCAGGCCAATAAGCG

GCGCGGATAATGCCGCTGCCACGCCCAGCATCATGGACGGATTGCCCCCGGCCAGACGGG

CGACGGAATCCCGCCAGGTAGCAGCAGTACCAGCAATGGCATACCCGGAAGATGCAGCGC

TGCGACCGTTAAAGAGAATGGGCGTCTCTGGATCACCAATCACTTCACCATCAGGCATGA

TATATGCGCCATGATGCCAGCCAGTGGTATGGGTGATAATCCATTCCCGATCAGTGCCGC

TTTGCTGCAACCAGTCGGCCAGAATCGCCCGGAAGGTGCTTTTAGTGGTCACATTCACCC

CACCAGCTTTAAGTGAGCGCCAGCCGTCGCGCTCACCGATATCAGCACAGGGGATCGCCC

TGGTAATATCTTCATGGCCACGCGGCGAACGCCAGCGCAAAACAAGATAGCGCTCTGCCC

CGTCACTACCGGAGCCGACCACCTCAAGAGGCGAGCACAGCCACGTTTCGTTATTGATGA

TCTCGCCACTATCCTTGTCCACCTTTGGCGTGATCCAGTACAGGCCATCGCTGCGGCTTT

CCACGCGGGGTTTGAGTTCATCGCCCGGTTCAGGCTTTGGCTCCCGTTTTTTCACAGGCA

GGTTCACCACAATACTTTCCCCGCGTTCGGCCTCTTCTTTGAGACGTGGAAGCCTGCCCG

TCCAGTCCTCCTTCGGCTGAGGCTCAAACATGCCATTAAACAGCCGGGCCTCTTTCACAT

CCGCCAGCGCCAATTTGGTTGCGATAGTGCTTATCTGCATTTCGGAAAGCTCGCCAGCTC

GGATCACACGAACACTGCGACGGCCGTTATCAACGATGTTTAATCGTTCCAGTTCTGCCA

GTTGCCTTTTGCCCAGATAAACAGGCGGTACATCATCCCACGCCCTTTTACCTTCGCTCT

CGATCCAGTGCTGCACATGTGAATAGGCATCTTCACCCGCAAAGATAATCGCCTCAGTAA

ATTTATCTTTCGGCAGAAATTTGATATTCGGGGCATTCTTCATCTTCATCAGTGCAACAC

CTTATTGGACATATCCGCGCCCAGGTCTTCATGCAGGTACTCAAGGTGGCAGCTTTTCAC

TATCTGCAACCCCATTTCGTTAATATCGCCATCGTCGGTAAAGCAGGTCAGCAGAATATC

CCGCAAACGCCTTAACCCCTCATCGCGCCCGAATTCTTCAAAGCAGCCAAAAATCATATA

TTTCATCAATACGTTTTCAGTTACGCGCGGCTCCAGCGTGAAGCGATAGCGGGCCATATA

CTTATCGCTTTCCACCAGCAAGGTTGCCGAACCGGTTTCCGCTATCTGGTGAGCAATACA

GGTTTCGGTCAGTTTGCGGAACAATGGGCCTATCACTTCAAAAATATCGGTCATTGCGGG

ATACCTCCGCTCATCTGAAATTTGCCAAGTAATGGGTGATACCAGTACGCCGATCCATAT

TTGCGCTTCGCGCTGCGCAGAACCTGCCTCGCCACCTCTCTGAACTTGTTATCCGGCGCG

ATAAAGCCACCAGCTTTCATTCTGACCAGCATCACGCCCGTGTTTTTTGCCAGCTCTTCG

GCTTTTTTCGTCGATATGCCGAACTCAGCCGCCAGCGTGGCGACCGGAGCCATACCGGGA

GGAATATCTCCCCCCTGGCTTTCGGTGAGTGTGCGCACCTGCTGTTCTAACTCCAGGACG

CGGTTAACCAGCAAATCGACACGGTTTTCCAGCTCGTTAAATTTCAAGAGACTGATCATG

ATTGCTCCCCCGCGTTATTACGCTGGGTACGCACATAATCCGCAGCATCACTACTCTGAT

TGAGTGCTTGCGCCATTCTGGGAAGGTGACGCAATGCATGGCTTACAAGGATCAAATCAC

GCCGGGCATCTTCATCGGAATAGTCCTCTGCATTGGTTGCATCAAACGCCAGATTGCCGA

TCAGTGTGAGCGCACTATTGATGGCAAATGCGCCAGCAGAATATAAATCGCTGGATTCAG

CCAAAGCCTCATCAGTGAAGTTTTTAAAATCAGGAGTGCTCTTAACAAGCTGATGGTAAA

TATCACGCATGGGTCACCTCACTTGCCGCTTTTAGTTCACGAACGCGGGACAACGACATG

CTGATCAGATCCATCGCAACGCTGTACTCGGTTTCATCATCAAAATTCATATACAGCGAT

GTTGAGAGCAACGCTTCCAGGCGGCGCAGTTCATCTTCAATGTCAATTTCCGACCATTTG

ACCTTACGCATGACGCACCTCCTGAATCGCGGCGCTGTCGAACTCCCACCCGCGGCGGGT

GGTGTAATCGAAGAACGCAACGCGGCAAGGAGCCTGAGCGCGGATTTTGGCGGCAAAAAC

TAAATCCCAGCCGGGGAAAGCGGCGCGGGCTTTAGCTTCCGTGTCAGCATCAAAGCGAAG

CACTACTGGGGTGCATTCAGGAGTGTGATCTGGGGTTGCCAGGAATAACCATGTAAATTC

CGGGCGAGTTTGGGTAGACTGATTGTCAGCCATAACTGTTACCTCACTTAACGGTTTGGT

GAGACGCCTCGGTACTGCTCGAACAGTCCGGGGCGTTGTTTTTTTAGATAGCACCGTGTT

AAGGTGTGTACCTATTAAAGAAAACAGTACGCCAATAGGTACGCACATGTCAACACCCAT

TAAACGAGATCGGCAACCAAAAGGAGCGGGGAAAGCACCAGCGTTCCAGATTCGAATCCC

CCCCGAACTTAAAGAGCAATTTGAAAAAGAAGCCCAAGCAGAGAGTGTTAGCCTCGCAAA

TTGGATGAAGGAATTAGGCCGGGAAGCCCTCCGAAAGAAAGGTATTGAGCCAAAAGGCTG

AATAAAATCAGCGGGCGCAGAATTGCGCTGGCTCATTCTTTGACCACCAGCATTAACCCT

GGTATGCTTAATCTGTTTCGGTTTTTCGTAGTGACATTGGCAGCTCTGCAAAGCTGCCTT

TGTTTTATTCAGCGTCAGCATTCGGCACCTCCGGCAATACACCACCAGCGATCAGTCTTT

TCGTTAACCACTGCTCACCCTTCCCCGTCAGCATCGTTGTGAATGAGGCTCTTACCTCGC

CATTCGTTTCATACGTTCCCTGGCGAACGGCAAAATAACCGCTATCGATATAACGCTGCA

TAGGCAGGTTGTGGCGCTGGCCACCATTGATGAGAATCCCCTGTTGCCTCATCCAGCCGA

ATAATTTGATGGGGCCAAGCCCTACGGCTTTGGCATAGTTTGGAATGGAAATCCCCTTAC

TGATCTCCGCCACGCGATCAGCGAAATCAACTTTTGGCGCAGCGGCCACCAGCCGGTTTT

CAAGTTCGCTTGCCTTTTCGGCCAGATCAGCAGCAAGGCGCAGGGCTTCCGGTAACGTCT

GGGGGATATTAGCGGCGGCTTTTGCCTGGCGTTCGCAGTTGATGAAATAGCGGCGCACCT

CCCGCCCTTTTTCGTTGCGCTCAACCATTGCCAGCTCTTTACCCATGTCGATGGTGATCA

GGTAATCATGTGCAATTTGTTGGCGATATTTTGCGCTCCCCGAAACGGGGGCGCTCAAAT

TTTCAACCACCGTAAAATCTACACCAGCAGTAAAACCATACTGGCTGATACGCCCCTTAA

TCCATGTGGTGAAATCACGCCCAACGCCGAGAAACTCATGGAGTTTTTTTGCACTGACCA

GCGATACCGTCACGCCGCCAATATTTCCGGGGTTAACCGGAACCAACTCATTTAATTTTT

GCATAGCGCCCCCCTTACGCGGATTTACGGTTGTAAGGGGTGTTGACGTTCTCAACAGCA

GGTGGATTGCGAACCCACCAAAGAACATCTGACAGAAGCCATGCGCAACTATTACGGCCA

AAGTGGCAGCGTGGCGGGAATTTACCTTCGTTCTCCATATACCAGCGGGTGGAACGGGAA

AGGCTGGTTATTTCGAAGCATTCACTTTCACGAATACGGCGATCAAACTTAATGCCATAT

TCTGCGAGAATGGTGCGGCGTTGTTCTGGTGTTGGCGGGGTAAAACGAGTATTTGACATG

CTTCCTCCACTTAACGCAATCAGAAGGAGCCTTTCCTGTCTGTTCTTGCGTTGTGGGGGA

AGTATTTGTCTAAAGTAAATTAATAAAAATGGCTTCTAAAATTTAAAAAGGCGTGTTTAA

TTCTAAAAAGGGTAATCTAATGATTAGAACACCCTTTCTAACGTTTAGAAGCTACTACAA

TTAAAACTTAAAGTGCCTACTAATGTATGAGGTAATTGTGTCAACGCTCTTGACCGGGCA

TTGTCCGTCAGGAAATAAGTGCACTCTGTCGGAAAGTTCTCTGGCCCATGCTGAGAAATT

GTAGCTCCCATCTTTTTTCAAGCACTTTTCATTGAAAATATCAGAACTTGTTTCTTTGAA

TTTTATTGCAGCACTTAAAATTAATAGTTCATTTCGTGCATGTTTTTCTTTTGCACTTTC

TGAGCGTTTATTAATACTATTTTTTGAATCAGAGTCTAAATCAGGTCGTTCAATATCATT

GAGCATTGGCAGCTTATCGAAATCAAGGCCGCTTTCCATAAGCCGTTTAATATCATAATT

AGTAACCCATAAATCATCATACCCGGCTTCAAACTCATAAGGGTCGAAATTAAACCTCTT

GCCATTAGCCTGATCGATAAAAGGTTGGGCTGGCAGAATCTGAATTACTGGAGTTTCACC

GCCCGTGAGGCACGGGAAAAATCCGGGGAAAAAATCCTTCACAGGTAAAGATGACTCAAA

CTGATCGGGCATTACCCGCCACAGACCTAATGCAAAGCCATATCCGACAAGGAACCCTTT

ACTTTCTTGTTCCGTAAAGATGTCTGAACCAGATAATAGTTTATCAGGTTCAAAATAACG

GCCATTAGTAAATTCAATAAAAGAGTGATTCGTTATCGCGCGGGTTTGCCCTGACATAGA

ATTAAAAGTACGAGGAAAATATAGTGATGAATACCAATCCTTTACATCACTAAAATCTTC

ACGAAGAAGGATTCGGCAGTGAAACCTTTTCAGCATCATGCTTATTTCGATTTTATTTTC

AATAGCAAGGTTGATCAAATCTGACGGTTCAACCCCCAGAAATGATGCACCTCTGGACAA

TCTACAATATGAAAATGGAATCTTTATTTCTTTTTCTGCCATAACGCTACCCTCAACGCC

CCTAATTAACTTGCGAGCCAGGCGGGTAGGGTTTCCCGCTTTTCGGTTGGCCGACCTAGA

CTCGCAAGACCAGTTTAATCTCTATTCGCTACAGTTAACAGAACCACATTTTGATGATTA

CCCGCAAGAAGTTCTAAGCGATCATACCACTTATTCAGCGCGTCCAGTTTCTCCGGCAGA

TACAGACTACGGTTATAAATCGCCATAACCCCTGGCATTGAGTGGCCCAGCAACTGTTCA

ACAACGTGCGGAGCTATACCCATATTATTCATATGCGTTGCAAGCGTTCGCCGTAGATCA

TGCAATGTCCAGGGTTCAGAATGCCTCAGTTTTTTATAAACACTACGGCCCCACTGGCTA

ACCGCTTCGCTATTCTTCACAACCCCAAGAAGGTAGCCGGATGATTTTGTTTCATCGTGG

AGCATTTCAATAAATGAACGCATCGCCTCTGGAACTGGACGCACAATCTTTTCACCGCCT

TTACTATGCGCTTTTGGTACTGTCCACACCCATGCCTCCATATCCCATTCGGCCCACTCT

GACAATCTGGCCTCCTGGGTGCGGCAACCAAACAAAGTGGTGATCCTGAGCAAGTTTGTG

TAGTAAGGCAGAAAAGTATCGCCGGACGATATAGCAGCCCATAATCCCCCAACCTCTTTA

TCTTTCAGTACCCGATCTTTTTTCGCCTGCTTTTTACCAACATCGGGAATACTCAAATCT

TCAAGGGCGGTACTGACGGCGTAACGGCGAACGCGGCAGAATTTCAGAGCCTGCTTACAC

ATCTGAAATACATAACCCGCAGCAACTGGCGTTTTCTTTTTCATCCTGTCAAAGCAGTCA

AGCCAGTATCGGGTTTCGCAGTCAGCGAGCGCCATTTTTCCAATGTAAGGGTAAATATGC

TTGCGTAGCTCCGCTTTATGCCGCTCAACGTTCGCACGGTTTTCTTCCGCATATTCGCGT

ATCCAGTATTCGATAGCTTCCTGCACCGTGACCGGTTTAAGCGTTTCCTGAGTAGTTAGC

GCCAACTGGTGCTTTGGGTCTTTACCTGAGGCCAGCCACTGGCGACATTTATCACGCGAG

GAACGGGCCTCTTTGAGACTCATATCAGGGTATCGCCCCAGAGTTAGCCGATGCAGCTTC

TGCCCGTCGAGCCGGTAAGTAAACACCCAGCTAATACCACCAGCTTTCGTTACCTTAGCG

CTCAACCCGGCACCATCAGCATAAAACTCAATCTTACTGGCCGGGATGCCATGTAATCCC

TTTAACTTCCTGTCGCTCAGTTTGTTAAGTTCGCCAGCCATAGACCACCACCCAGCCCAA

AGTGTTTATACAAATGTTTATACAGAATTGCTTGCATAATAGCATAAACAACAAAAAGCA

CTGGAACAATATACAGTCACAATTTCACATAACCAATTGATTTTAAATAAAATACAAAAC

CCACTCCAAAGCATGAAAACAGCTAATCTGACAGTACGGCATGAACTGATACTAGTCAGT

TGCTTGCTTGATATAAAAGGCGCTCTTCGGCATGGGGAAGCGCCTTTTTTATTATCTGCG

CCAACAGAACTCATTACTAATTCACCAGCCGTAGCGCAGGCCCTCCCGATAAACGCGCAG

CACAGACCACCGCCATTATATTATCCACCAGCGCAGGCGCCTGCTGATAAAGATCGAAGC

GTTGCGGATCGAGCAGCCAGTTTTTAATCAGCCCGGAAAAAGCACTGTGTAAAACAATTA

ATATCATCTCAATGTTTGTTTCGGCTGGCAATATATTGTTACGCACGCAGCACTGCAGGA

TGCCGCCAATGAGTGAATAATTAAAACCAATACGTTGGCGAATTTCGTATTCCGAAAGCA

TATCACTGGAAAACTCACAGCGCTGATAAAGAATTTGCATCAGAGCGCGCTGTCGAGGAT

TCGCAGCAATATAGCGCAGGCCTGCAATAAACCGCTCGCGTAAAGCATTTAGCGGCTCAT

GTTCGTACTCTATGGCCTGACTGGGCTGAATCAAATCTCTAAGCGGCGGCTGCTGCTGCC

ACATTTCATTAAACAGCTCCGTCTTACTGGCAAAATGCCAGTACACCGCGCCGCGAGTCA

CTCCCGCCGCATCGGCGATATCCGTCAGGGTGGTGTTGGTTACTCCGCGCAGGGCGAACT

GCTGGATTGCGGACTCAATCAGGAGCTGCCGCGTGCGCTGCGCCTCTTCTTTTGTTTTTC

TTGCCATACAAGGCCCCACTTCCCGATAAGCAGATAATATAGGATATTCTTAATTAGAAT

TAATCTAGCATTTGCCATGAAGTATTATTTAGCAAAAATGCAGACAAGTTAATCCTGATG

CGAAAAGAGAATTAATTATTCAAGTGAATATCACCGGAAAATACATTCACTGAAATAATG

TCTATTTATCAACTTTTACAATTGCGATAAATCGCAATACTACAGTGACCATTTTTTTGT

TTTTGCGTGCCTTGCTGATTGCTTAAAAATAAGTATCTCTTACATCCAACGGCGTTTATT

TGTAGGATGGCAAACTGCTTTTTGATTCCCTCTTTCTTTCACAGATTCGCCGCCTGATTG

GGTACGTAATCTATAAGGAACCGCCATGACGACTCACGCCAGAGTGACACTTTTATCCGG

TTTAATTATCTCGGCCTTATTGCTAACCGGTTGCGATAATTCTGACAACCAGCAACCCCA

TGCGCAGGCGCCGCAGGTGACGGTCCATGTCGTGAACAGCGCGCCGCTATCAGTCACCAC

CGAACTGCCGGGCCGAACCTCTGCTTTTCGCGTAGCGGAAGTCCGCCCCCAGGTGAGCGG

TATCATTCTGAAGCGTAACTTTGTTGAAGGAAGTGATGTCGAAGCAGGCCAGTCGCTCTA

TCAGATCGATCCGGCGACCTACCAGGCGGCGTGGAACAGCGCCAAAGGCGATGAGGCCAA

AGCCGAAGCCGCGGCCGCTATCGCCCATTTGACGGTGAAACGCTACGTTCCACTGCTGGG

TACTAAATATATCAGCCAGCAGGAATACGATCAGGCAGTGGCCACCGCCCGCCAGGCCGA

TGCCGATGTCATCGCCACCAAAGCTGCCGTAGAAACGGCCCGTATCAACCTGGCCTACAC

CAAAGTAACCTCCCCCATTAGCGGGCGCATCGGTAAATCGAGCGTCACCGAAGGGGCGCT

GGTCACCAACGGCCAGTCGGATGCCCTGGCTACCGTCCAGCAGCTCGATCCCATCTATGT

TGACGTGACGGAGTCCAGTAATGACTTCATGCGCCTTAAGCAGGAAAGCCTGCAGCGCGG

CGGTGATACCAAAAGCGTTGAGCTGGTCATGGAGAACGGCCAGGCCTATCCGCTCAAAGG

TTCACTGCAGTTTTCTGACGTCACTGTTGATGAAAGTACGGGCTCAATTACTCTGCGCGC

TATCTTCCCTAACCCGCAGCATGTCCTGCTGCCAGGGATGTTCGTCCGCGCCCGCATAGA

CGAAGGCGTCGATCCGCAGGCTATCCTGGTACCGCAGCAAGGGGTGACCCGCACGCCGCG

TGGTGATGCCTCCGTGATGCTGGTGAATGACAAAAACCAGGTTGAAACCCGGGAAGTGGT

CGCGACTCAGGCCGTTGGCGATAAGTGGCTTATCACCAGTGGGCTGAAGCCGGGCGATAA

AGTGATTGTCAGCGGCTTACAGAAAGTCCGTCCAGGCGTCACTGTCAAAGCGGAAGCGGA

GCGTGCGGCGCCGGCCGTGCAATAAGGATACCCAGCCATGTCTAAGTTTTTTATTCATCG

ACCGGTCTTCGCCTGGGTGCTGGCTATCATTATGATGATTGCCGGCGGCCTGGCCATCCT

GCAGCTGCCGATAGCTCAGTACCCGACAATCGCCCCTCCTGCGGTAGCGATCTCCGCCAC

CTACCCCGGTGCAGATGCCCAGACCGTACAGGATACGGTCACTCAGGTTATCGAGCAGAA

TATGAACGGCATCGACAATCTGATGTATATGTCGTCGACCAGCGACTCTGCCGGTTCGGT

AACCATTACGCTCACCTTTAAATCGGGTACCGATCCCGATATTGCCCAGGTACAGGTGCA

AAACAAACTGCAGCTGGCCACGCCGCTGCTGCCCCAGGAAGTACAGCAGCAGGGGATTAG

CGTCGAGAAATCCAGTAGCAGCTTCCTGTTGGTCGCCGGCTTTATCTCTGATAACCCGAC

CACCACCCAGGACGATATTTCTGACTATGTCGCCTCCAATGTCAAAGATCCTATTAGCCG

CCTCAACGGCGTGGGCGATGTGCAGCTGTTCGGCGCGCAATACGCCATGCGCGTCTGGCT

GGATGGCAACCTGCTGAATAAATACAACCTGACGCCGGTGGACGTCATCAATGCGCTGCA

GGTCCAGAACGATCAGATCGCCGCGGGTCAGCTCGGCGGCACGCCAGCGCTGAAAGGCCA

GCAGTTGAACGCGTCAATCATCGCTCAGACGCGGCTCAAAGATCCGCAGGAGTTTGGCAA

GGTCACGCTGCGGGTCAATGCCGATGGCTCTGTCGTCCATCTGAAAGACGTCGCCCGCAA

TGAGCTGGGGGGAGAGAACTATAACGTTGTCGCCAGAATTAACGGTAAACCTGCCTCTGG

TCTGGGTATTAAGCTTGCGACCGGCGCCAACGCCCTGGATACCGCCACCGCGATTAAAGC

GAAGCTGGCCGAGCTGCAGCCCTACTTCCCTCAGGGGATGAAGGTGGTCTATCCGTATGA

TACGACCCCTTTCGTCAAAATCTCCATTCACGAAGTGGTCAAAACGCTTTTTGAAGCAAT

TATTCTCGTCTTTCTTGTCATGTATCTGTTCCTGCAGAACATGCGCGCAACACTCATTCC

AACCATTGCCGTACCCGTGGTGCTGTTGGGAACCTTCGCGGTATTGTCGATGTTTGGCTA

CTCCATCAACACGCTGACAATGTTTGGCATGGTGTTGGCGATAGGTCTGCTGGTCGATGA

CGCTATCGTAGTAGTGGAAAACGTCGAACGTGTGATGGTTGAGGAGAAGCTCTCGCCAAA

AGAAGCGACGGAAAAATCTATGTCTCAGATCCAGGGAGCGCTGGTGGGTATCGCCATGGT

GCTCTCCGCAGTATTTGTCCCGATGGCCTTTTTCGGCGGCTCAACCGGCGCGATTTATCG

TCAGTTTTCAATCACCATCGTCTCCGCCATGGCGCTCTCCGTGCTGGTTGCGCTGGTACT

GACGCCGGCGCTCTGCGCCACGTTGTTGAAGCCAGCCTCAGCTGAACACCATGAGAAAAA

AGGATTTTTCGGCTGGTTTAACGCCCGCTTCGACCAGAGCGTTAACCACTATACCAACAG

CGTCAGCGGTATTTTACGTGGAACTGGCCGTTATCTGGTGATCTACCTGCTGATCGTCGT

GGGGATGGCCGTGCTGTTCATGCGCTTGCACACGTCCTTTCTGCCCGACGAAGACCAGGG

CGTCTTCCTGACCATGATCCAGCTGCCGTCCGGTGCTACCCAGGAGCGCACGCAGAAGGT

CCTGGATACGGTGACTGATTACTACCTGCATAACGAGAAGGCCAACGTTGAAAGCGTCTT

TACCGTTAACGGCTTCAGCTTCAGCGGCCAGGGACAAAACTCCGGTATGGCGTTTGTCAG

CCTGAAGCCCTGGGAAGCGCGCAGCGGCGATGAAAACAGCGTGGAGTCCATCATCAAGCG

GGCCACCGTAGCCTTTAGCCAGATCAAAGACGCCATGGTTTTCCCGTTCAACATGCCAGC

CATTATTGAGCTGGGTACCGCCACCGGCTTCGACTTTGAACTGATCGACCAGGGCGGACT

CGGTCATACCGCTCTGACCCAGGCGCGCAATCAACTGCTGGGCATGGTGAAACAGCATCC

GGATCAGCTGGTTCGGGTACGCCCTAATGGGCTGGAAGATACCCCTCAGTTCAAACTGGA

TGTCGATCAGGAAAAAGCGCAGGCGCTGGGCGTATCGCTCTCCGATATCAATGAAACGAT

ATCAGCCGCGCTGGGCGGATACTACGTCAATGACTTTATTGACCGCGGCCGCGTGAAAAA

AGTGTACGTTCAGGCTGATGCCCACTTCCGTATGCTGCCGAGCGACATTAACAACATGTA

TGTTCGTAGCGCCAACGGCGAAATGGTGCCGTTCTCCGCCTTTGTCACTTCACGCTGGAT

ATATGGCTCGCCGCGCCTGGAGCGCTACAATGGGTTGCCATCTATGGAGATCCTCGGTGA

AGCTTCGCCAGGCAAAAGTACCGGGGAAGCCATGGCGCTGATGGAAACGCTGGCCAGTAA

ACTGCCGAGCGGCATCGGTTATGACTGGACCGGGATGTCTTACCAGGAACGGCTCTCCGG

CAACCAGGCGCCTGCGCTCTATGCCATCTCGCTGATCGTCGTCTTCCTGTGTCTGGCGGC

GCTGTATGAGAGCTGGTCGATCCCCTTCTCAGTCATGTTAGTGGTTCCGCTGGGGGTCAT

TGGCGCGCTGTTAGCCGCCACGCTGCGTGGGCTGAATAATGACGTTTACTTCCAGGTCGG

ACTCTTGACCACGATCGGTTTGTCGGCCAAGAATGCGATCCTGATCGTCGAGTTCGCCAA

GGATCTGATGGAGAAAGAAGGGAAAGGGATCATTGAGGCCACGCTGGAGGCATCGCGGAT

GCGCCTGCGGCCTATTCTGATGACCTCTCTGGCCTTTATTCTCGGGGTCATGCCGCTGGT

GATTAGCCATGGTGCCGGCAGCGGGGCGCAGAATGCGGTTGGCACCGGCGTGATGGGCGG

GATGCTGACCGCGACGCTGCTGGCGATCTTCTTTGTTCCGGTCTTCTTTGTGGTCGTCAG

ACGACGTTTTACCCGGCACGCTGAATAACGCGGCCTGGTTTTAAAGGCGCCCCCTGCGGG

CGCTTTTTTTTCGCCTGGCATATTAGCAACCCGCTCAGCTTCCCGCTATCTGACAACCTC

TATCGCATGCGGCAGCGCGGGGAGACGATCTTTCTCTCCATCTTTTCTGCATATTCCCCT

GCTTATCTTCACGATATTTACGTGGCTCATATATTGAGATGATTTCGGCCTCCGGCCCGG

ACAATCCGCGGTGATAAAATAAGCCATTCCGTTCTGCACTGGCTCTCAGTACAACCCTGC

GGATTATCCAGAGGTAATATCATGAAAAAGTATTTAATCGTGGCGCTGCTGGCCTCTCTA

CTGGCAGGCTGTGCCCATGACTCTCCCTGCGTACCGGTTTATGACTCGCAAGGCCGCTTA

GTCCATACCAATACCTGTATGAAAGGCACAACAGAAGACAACTGGGAAACCGCAGGCGCA

ATCGCCGGGGGTGCGGCCGCGGTAGCCGGCCTCACGTTAGGGATCGTTGCTCTGACCCGC

TAATTCACCCCCGACCAGCAGATACTGGGGCTAGCGTCGAACCTGTATCTGCTCTTCTGC

GCATCATCCACATGACAACCGGGCAAATAAACTCTCTGTCCCTTGCTGCATTACGAGCAA

ATCGACTTTGACGGGTTTCCCCCTGGTGGCAGGACTGTTTATCAACAGATAACAGATAAC

ACAAAAGCAGAAGGCCCAGTCTTTCGACTGGGCCTTCTGCTTTATTTGATGCCTGGCGAT

TCCCTACTCTCACATGGGGAGACCCCACACTACCATCGGCGCTACGACGTTTCACTTCTG

AGTTCGGCATGGGGTCAGGTGGGACCGCCGCGCTATTGTCGCCAGGCAAATTCTTTACAA

CGTGCCGAACTTTAACCTAAAAAGTGGTGCTGATACCCAGAGTCGAACTGGGGACCTCAC

CCTTACCAAGGGTGCGCTCTACCAACTGAGCCATATCAGCACGCTAAATTTGATGCCTGG

CAGTTCCCTACTCTCGCATGGGGAGACCCCACACTACCATCGGCGCTACGGCGTTTCACT

TCTGAGTTCG

>NODE_30_length_12893_cov_34.472893

AGATCCCAGATAGCCCCCTGCGCGCTTTTGAAGGCCTTGCTGATCTGGAATTCGCCGCCG

TTGCTTTCGTTGCCCAGACGGCCGATCGCCGAGGCGCCGTTATAGGAGCCGTCGACGCCG

ACATATTTCTGGTCGCCGGTCTGGAAGTGAGCGCCATAGCGGGCATAGCCGCTGAACTTG

AGGCCAAACGGAATGGCCATATCCGGCGAGGCGGCGGTGGTTTCCGGGTTAGTAATCACG

TCGACCTTTTTGTTGGCCGCGGCGTCGATTTTTGCCTGGCGGTCGGCCAGCGCTTTATCA

ACGGCCTTGGCAACGATGGCGTCGATCTGTTCCTGAGTAAATTCTTGCGCCATTACAGAG

GTAAGTGGAAAAAACGCGGCGATAACCGCCATGGTTAATGGAAGTTTTTTTATCATTGTC

ATGAGTTTCTCAATATAGGTTAATTTTATTCAGACAATAACCAGCCTATTCTGAGCTGAC

AGAATATGTCGCTATCATCAGAACAAGTTATTTTTTATTTTGTACGGTCACAGAGGCGTT

ACACAATTATCGTTACCCTTCCTCCTTCGCTGATATTAAACAGGTGGTCTTTCGCCACTG

ACAAAAAAAACACAGCACGAACCAATAAACGCTATTTCCCGGCAGCGGATAGACGGCGGA

ATACATGCCCCCGCGGGAGCATGTCAGCAAAAATTAACCAAAGATATAGGTATTGACGAG

ATTTTCGAGTAATTCCTGACGCCCGCTCTGAGGCTGCGGATTCAGATTATGCTGCTCAGC

GTATCGGGCAATATTATCCAGCGACATCTGCCCGCTCATAATTTTCTGCCCCAGCTCGCC

CTGCCAGCCGGCATAGCGTTTTGCCAGACCCTGATCGAGCTTGCCATCCTCAATCATGCG

CGCGGCCAGCTTGAGGGACAGCGCCATCACGTCCATGGCGCCAATATGGCCATAGAACAT

GTCGTATTTGTCGGTGCTCTGCCGGCGAACTTTGGCGTCAAAGTTCAGGCCGCCGGTGGT

GAATCCCCCGGCTTTGAGGATCTCATACATCACCAGGGTATTTTCTTCCACGCTGTTCGG

GAACTGATCGGTATCCCAGCCGAGCTGCGCATCGCCGCGGTTGGCATCAACGGAGCCGAA

AATGCCCAGCGCGATGGCGCTGGCGATTTCATGGTGGAAAGAGTGCCCCGCCAGGGTGGC

GTGGTTGGCTTCAATGTTCACCTTGATCTCATTTTCCAGACCAAACTGCTTCAGGAAACC

ATACACCGTCGCGACATCGTAATCGTACTGATGCTTGGTGGGCTCCTGCGGTTTCGGCTC

GATAAGCAGCGTGCCGCCAAAGCCAATCTTATGCTTGTGCTCCACCACCATCTGCAGGAA

GCGGCCAATCTGCTCACGCTCCTGGCGCAGGTCGGTATTCAGCAGGGACTCGTAACCTTC

GCGGCCGCCCCACAGAACATAGTTTTCGCCGCCGAGCTGGTGGGTAGCGTTCATGGCGGT

CACCACCTGCGTGGCCGCCCAGGCAAACACCTCCGGATCGGGGTTGGTCGCCGCCCCGGC

GCCGTAGCGCGGGTGGGTAAAGCAGTTGGCGGTGCCCCACAGCAGTTTCACGCCGGTTTG

CTGCTGTTTCTCCGCCAGCACCTCGGTCATGATGGCGAAATTATGCAAATACTCTTTCAG

CGACGCGCCTTCTGGCGAGACGTCGACATCGTGGAAGCAGTAATACGGCACGTTGAGCTT

GTAGAAAAATTCAAACGCCACGTCCGCTTTGCGTTTGGCCATTTCCAGCGCATCGCCCGC

GGCCTGCCAGGGACGCTCAAACGAACCGGCGCCAAACATATCCGCGCCATTCCAGCAGAA

GTTATGCCAATAACAGGCGGCAAAACGCAGATGGTCTGCCATGCGTTTTCCCAGCACGAT

TTCATCCGGATTATAGTGGCGAAATGCCAGCGGATTATCGGTTTTGGGTCCGGCAAAGCG

AACGCGTTCGAGCTGGTCGAAATAGGTTTGCATGATGAACTCCGAAATTGAGAAACAGGA

AAATTAACAACTGTGACACATCGTGTATTCTCATCGTCGGTTGCTCAATTACGTTATTTC

ACTCGGCGATTGAGAAAATGCTCAAATGTGAGCCATCTCGCAAATAAAACTATTTTAAAT

ATCTCGCTTCGCGCGCGTATAGCGTACACTCCCTGGGGAATTCAGGTATCCATATCAAAT

TAAAATGCCGGTTTTGTCACTTTGTCTGTCTGCCCGAAAATTAGCGGCGGAAAACGGTTT

AACGCAGGTGATACAGGCCTTTGCTTCGAGGATCACAGAAGTAAAAAAACATAATTACGT

AATTTAAAAACGTAATAGATTCTTCCTGGTCAACTGTGTCAGAAAGTGTTTCACCTACAC

AAAACAAACCGGAGTCTGCTTAGAATGAGTAAAAACATAATGCACAGTCGGCATGATGAA

TATCATAAATTAACCCGCGGAGAACGAATTGGTTATGGCATGGGCGACTTTGCGCAAAAC

CTGGTTTTCGGCACAATTGGGGGTTTTCTGGCTTTGCATATGCTGACGGTAAATACCATC

AGCACGGCAACGGCAGGCTTTATTTTTCTTTTTGTCCGCATCATTAACGTGTTTTGGGAT

CCGATGGTCGGAACCTATGTGGATAAACGAACCTCAAAAGCAGGGAAATATCGTCCCTGG

CTGTTACGAGCCGGCGTGCCGCTGGTGATCCTGTCGGCATTACTGTTCGCGCCAATCCCC

GGAGTGAAAGGTTCGGTGGCTTTCGCCTTTATTATTTATCTGGCGCTGGACCTGGTTTAT

TCCTTAGTCAATATTCCCTATGGCTCGCTGAATGCCTCGCTGACCCGCGACCCGGAATCG

ATCGATAAGCTGACCAGTACCCGCATGATGCTGGCCAACAGCGCCAACCTGCTGGTCTAT

ACCCTGTTCCCGATGTTTGTGCAGATGGCGGCGCCGAAAGATCGTAGCCTGAAAGACACC

GGCTTTTTCGGCCTTGAGCTGAATCTGGGCAACTATACCGATCCGTCAGCGAACTACGCC

TGGTTCGGCGTGTACGCCATCTATATGATCATCGGCGCGGTGGCCCTGTTTATCTGCTAC

AAATGCACCAAAGAACGCGTTGTCGCGACCGCCGAGCAGACCGCCAACGTCAAAACTACC

GACCTTTTCCACGAGCTCAGACATAACCGTCCGCTGGTTATTCTCGGCATGTTCTTTATG

CTGGCCTTTACCTTCATGTTCTTCATGAACACCGTTAACGGCTTCTTCAACCAGTTCGTC

GTCGGCCATTCCGAATGGATGGGCGCGGTGGGTCTCGTCGCGTCTATTCCCGGCATCGCC

TTCCCGGTGTTCTGGCCGAAACTGAAAAAAATCTTTGGTAAAAAAGGCTTCTTCCATCTG

TTCCTCGCCATGTTCATCGTCGGCGAACTGCTGACCTACGTCTGGTCCCGCGAAGGGATG

CACGACGCCCTGTGGCTGGCCTACATCGCCACCTTTATTAAACAGTGGGGCTTAACCTCC

GCCACCGGCTTTATGTGGGCGCTGGTACCGGAAGTTATCGCGTACGGCGAATTAAAATCG

GGCAAACGCAATGCCGCCATTATCAATGCCATTATGGGACTCTTCTTCAAGATCGGCTTC

ACCATCGGCGGCGCTATCCCGCTGTGGCTGCTGGCGGTGTATGGATTTAATGAAAGCGGC

GCCGTGCAGAGCGCCAGCGCCATCGACGGGATCATTATGACCGCGGTGTGGATCCCAATT

GCGCTGGCCGCTATTTCGATGGTGATCATGCAGGTTTATCCGATCTCCGATAAACATGTT

ACCGACATCAACCGTCAGCTGGATGAGATCCGCGTGTAGTTAAAAAAATTATAAATCAGA

CCGATCCTTAACTTTCCATTTTAAAAGGTGTAATGAAATGTCACTTATTCAAAACCCGAT

ATTACGCGGCTTTAATGCCGACCCCAGTATTATTCGCGTCGAGGATACGTACTATATTGC

CAACTCGACGTTTGAGTGGTTCCCGGGCGTGCGTTTACATGAGTCCAAAGACCTGAAAAA

CTGGAACCTGCTGCCTTCGCCGCTCTCCACCACCACCCTGCTGGATATGAAGGGCAACCC

CTCCTCCGGCGGCATTTGGGCGCCGGCGCTCTCCTGGGCCGACGGGCAATTCTGGTTGGT

GTATACCGATGTGAAGGTCACCGAAGGCGCCTTTAAAGACATGACCAACTACCTGACCAC

GGCGAAGGATATTCGGGGCCCGTGGAGCGACCCGATCAAGCTGAACGGCGTCGGGTTTGA

CGCCTCGCTGTTCCATGACGACGATGGCCGGAAATATATCGTCCAGCAAACCTGGGATCA

CCGGGAGTACCATCACCCCTTCGATGGCATTACCTTAACGGAGCTGGATACCAAGACGCT

GAAGTTAATGCCGGAAACCGCGCGCACCATCTACCGCGGCACCGCCGTGGCGCTGGTCGA

GGGGCCGCACCTCTATAAACTGAACGGCTACTACTATCTGTTTGCCGCCCAGGGCGGCAC

CGTGTTTACCCACCAGGAGGTGGTGGCGCGGTCGAAAACCCTCGAGGCCGACAGCTTCGA

AACCGAGCCGGGCGACGTGTTCTTAACCAACGTCGATACCCCGGACAGCTACATCCAGAA

ACAGGGCCATGGCGCGCTGGTCTCCACTCCGGAAGGCGAATGGTATTACGCCTCGCTCTG

CGCCCGGCCGTGGAATCGCCCGGGGGAATCCATCTACGACCCGCGCGGCTGGTCAACCCT

CGGCCGGGAAACCGCGATCCAGAAAGTGTACTGGGACGACGAGGGCTGGCCGCGTATTGA

AGGCGGTCACGGCGGGAAAACCTTCGTCGAAGGGCCAAAAGACGCCATCTTCACCGAAAG

CGCCAGCGATAATAGCCAGCAGGATGACTTTACCTCGCCAGCGCTCGACCCGAACTGGAA

TACCCTGCGGGTGCCGTTTACGGCCAAAATGGGCACCACCGGCGACGGCAAATTAACCTT

AATCGGCCAGGGTTCGTTAGCCAATACGCATGACCTGTCGCTGATTGCCCGCCGCTGGCA

GGCCTTCTATTTTGACGCCGCGGTGAAGGTGAAATTCGAGCCCTTCAGCTACCAGCAGAT

GGCCGGGTTAACGAATTACTATAACGACCGCCACTGGAGCTTCGTCTTCCTGACCTGGAA

TGAAATTAACGGCAAGGTCATCGAAGTCGGCGAAAATAACCGCGGGAAATACACGTCGTA

CCTGAAAGATAACGCCATCAAGGTGCCGGACGGCGTCGAATACGTCTGGTTCCGGACTAA

AGTCCGCAAGCAGACCTACAGCTATGAATACAGCTTCGATGGCGTGACGTTCACCGAGAT

CCCGGTCCAGCTGGATGCCGCGGTACTGTCCGATGACTATGTGTTGCAGAGCTACGGCGG

GTTCTTTACCGGGGCGTTCGTCGGCCTGGCGGCGGTAGACTACGCCGGGTACGGCACCCA

GGCTGAGTTTTATCAGTTCGAGTATCAGGAACTGGGCGATAGGTTAGCGGCCGATGGGAG

CTATAGCTGGGAGGCTGGCGAGACGCGGGATAAGTAAGAGAAAGCTGGCCCACGCTACCG

GTGAGGTAGCGTGGGGTTTGTGCTGTGTGTGATGTAATTAAAGCGAGCGCTGTAGGATGT

CAGTCTGCGGGGCGCAGCCGGGCCTTCAGCTCTTCGGGAGTAAACGGCGGATCTCGCCGG

TGCAGCATTGCATGGCAATTGGGACATACCGGGATCAGATCGGTTTCAGGGTTCAGACGG

TAGTCCTGCTTGATCCCGGCCAGCGGAATGAGATGGTGGATATGGATAAAACCCTGGCCG

ATTTCGCCATAGCGGCTGGCCATATCCAGACCGCATACCTGACACCGGCAGCCATGCAGG

CGAAGCGCCGCCTGACGAGCCTGACGGTCGCGCTCATAGCGATTGACCACCACCTGCATC

GCCGCCCCTTCCACGAACTCCATAGTCGTCTGTCCCTCATCGGGGAAAAGCGCAACCTCG

TCATCGCCAGCGCCCTGCGACGCGATCGTAAATCCTTGATCCAGTAACAGACGCACGCAT

TTGGATTTAATCCCTCCGCTGAAATCCGCCGGGGTAAATTCCGTTCCCGTGGCAAGCGTG

GCCGCTAACCCGACGATGGCTTTTGAAGGATACCGACGCCCCTCAAACTCGATCTCGTAC

AGACGCGCGCTTTTAAACTGATGCGCAACGCCTGCATCGTAAGCGCGAATGGCAGCGATG

ATGCATTCCCTGGATAAATGGTCCGGTAGTTTTTTCATAAGACATAGCTATCTGATGGCG

CGAAGCTTGAGTATAAATAGAAAGCTATGGGCTTTTCGAACAAATAACTAGCAGTGATAG

TTAAATAGCGATCCACGTAGAATCGCCGCATCTGGTGGGTTGATCGGCAAGGATTTTGCG

AGCATCATCGCATTTATTTAGCTGCCAATGTAACGCTATGCCCTCCAGCACGACCCTGCA

ACACGCGATCGAGAACATCACTATCTGGCGCAAAGGCGAACAGCGTGCGCCGCATAAGCC

ACTGTTACTGCTGTACGTCCTTTCCCAGTACCAGCGCGGCCATGCGCGGATGTTCGACTA

CGCCTCGGAGATACGCGATGAGCTGCATAGCCTGCTGGAACGCTTTGGCCCACAGCGCCG

CCAGTACCGGCCGGACATGCCGTTCTGGCGCCTGAAAGGCGACGGCTTCTGGGAGCTGCA

CAACAGCGAGCAGTGCTCAATCCAGGGCAGCCGAAAGCCGCCCGGCAAAGAGCTGGAGCT

CTGTCACGTCGCCGGCGGCTTCGATGAGCCGCATTTTGCGTTACTCAACAGAAATAAGAG

GCTGATCAATACCCTCGCCCATCAGATCCTCGAGGCGCACTTTCCGGAGAGTATTCAGGA

AGAACTGGCAGAAGAGATGGGGTTTGATCTGCTGCAGATCCGCAAAGAGCGCGACCCGCA

TTTTCGCCAGCAGGTGCTGCGCGCCTATAACTATGAGTGCGCGATCTGCGGCTTCAATAT

GCGCCATGATAATACCTCCGTCGCCCTGGAAGCGGCCCATATCAAATGGAAGCAGCACGG

CGGCCCATGCGAAATCCCTAACGGCCTGGCGCTCTGCGCGATTCACCATAAGGCTTTTGA

TAAAGGATCCATTGGTCTGGATGAGGATATGCGCATCCAGGTTTCGCCAGCGGTGAACGG

CGGAGGCATCGTTGGCAGGCTGTTCTGGGATTTTGATGGTAAGCCGATTACCTTGCCGCA

GGGGAAAGAATGTTATCCCCAGGAGGGGTTTGTGGCATGGCACCGGCGGGAGGTGTTCAG

GGGGTAAGGGGGGATGGTGATAAGCGGGTTTCGATGCTGCCTTCTCGCTCCTGAACATCA

ACAGCTCCTTTCGTGTCTGCGCCACCATCGTCTTTAAGACACATATACGGAGGAATTGGC

ATCTCATTTGCTCCTTATCGTTGAAATTAGCTGCAATGTAATAATGTAGAGTACAGCTGA

AAGGAATATTACTATTATCAGTGATATATAAAAGAAAGTGTCATACATCGTATCGGCGTT

CACACTCCCGAACAAGAAGTGGCAAATATCCCTTGCGATATCATAATCGAGATAGATTTC

CGGCCTTGGAAGTGCACGTCCCAGAACCAAAAACAGCAATATAAAATAAATAATCTTACT

GATTTTACGGGCAAGCGTTATTAGAGCCACTGGCAACAACCTCCACCCAACCGCGAGCCA

TCAGGGAACGGATGCAGGGAACCTGTACTAACGATGTATTCATAAGCGCATTCCGGATCA

TGGCAAAATCAGAATTATGGGCGATAGTAATACAACCCTCGGAAACCGTACCCGGATGCA

AACGGAAGTTACCACGTTTCACACCCTCTACCCACGTCTCATCGTCAATTCCGCGGTCGT

CACGCCATAACGCAAACCAATCGCTATTCCCCCGCCGTAGTTCGCGGCAGGACGTAATGA

AACGATTGGTATTAGCCCTGCTTTTATTTATTTTCAAAGAATCGGCTGTAGCCCCCGCTC

TCACGCCGGAAGCGGATATCACTCTGGTGAATCCGTCAATGTTTGCTCGTGAAGGATATC

GACGGCACAACATGATGCTGTCGATGTGTTCACATAAACCGCCTGTTCATGAGTCATAAC

CCGTTTCTGCCATGAACAAGTCAGAGCAAATACATATAAACCAATAATTTTAACATCCAA

ATTTTTTGCGTATCCAATCACTTATCGAATACTTATATGCGCTTTATTATTTATTAAATT

AATACATCTCACACCAAGATAATTCATCATAATAATCAACCGTAAAGTGATATACTATGC

TGTTTTAAGCCTTATTTAAATCAATGGTTCAAAATCATTTTGCAATACAATTTGTAACAA

TTAGGTTATAGTAACACTTATCAAGTTACTTATTCTCTTGTAAATTACCATCGATTATTT

CTTGCAAAAATGATGTACATCCTCAGTCATTTATTTAAACATAGGATAGCTATATGGCAG

ACATAGAAGGGATAGCGCGGAAGTTATATAACATCATTATCTCTCCTGATACAGTTACAG

GGCTTATCAATGGTGGATTATCTGTTCCTTTAGATTATGGTTATCTGATTTACGGTATCT

TTGATACGGATACAAGATATGAACGTGAAACAGAAAGAATCCGTATGATGACCGCGATAA

GACATGACATTCTTAACTATGAAAATATCGTTAATGCAGTTAAATTAATCTTTCAGTTAT

TTAATAAATATCTATCCGAATCAGAACAAGATAGAATATACAGAAGTGTAGTTACCTCTA

TCGTGGGTAGAATCTCTACGAATATTATCGCATCGAACATCGCTAAAGCCGTTATAGAAA

AAACGTCATTTACTTATGTAGTATTTAAGGGGAAAGGGAATCCAATAGCCTTTTTAAGTA

CTATCCTCTTGTTTGGTGGAATGGCAGAGCGATCCATCAGGACGTCTGATAAACTCAGGA

ATGAAGAGCCCGAGGTATACTCGTTGTTAAGACCCCGCGATTATGATCTGCTTTATTTCT

TATTTGCCGATGCGGTACAACCTTTTGTGGATGCCATCCATGCAGGGTACACCGAGGGCA

ACCCCGTATTCGACAAGATTATGAAAAGAGTGGAAGATCATTTAAATACGAATGCTAAGG

CTGGGTGATATGAAAAAAATCATCACGCCACTCGTCGATATAGTTCTCTGCACCTATATT

ATTACCACATGCTTTATTTGCCTGACTGAGTTTAATAACTGGCAGAATAAAATAATCGCA

GTGACGATTATAATCGGTAGCGCTTATATCATCGCCATTGCATTGAATAGATTACTGGGA

ACAAAGATAGGTGTGTTAAGCGGTATTTTTAATTTACTATCAGGCCCACTATTAATTATT

GGCGCTATTGTTTGCATAGCCTTACTTGACCCGTGGCCGGTTAAGGTTATTGGTCTGTTT

TTATGGGTCATTATAATGTTTTGTTTACCTTCATTTATAAATAGAGATAAGGAATAATCA

TGTCAAATCCAGCATATCTTTGGCTAACCGATACAAACGGCTCCCCTATAACGGGTAGTT

CTCTCGTTACAGGGCGTATTGGCGCTATTGAATTAAAAGCGGTAACGCACCACCTATCCA

TTCCTGTGGATGGAAACACCGGGAGATTAACAGGAACCAGAGTACATACGCCTATTACGG

TACAGAAAGATTTTGATAAAACAACGCCCCTTTTATACAAAGCGCTGAGTGAGAACCAAA

CATTAAAGTCGGCAACCATAAAGATGTATCAGATCCTTGATGCAGGTGTTGAAAGCGAAT

ATTTTAATATTACATTAGAGAATGTAAAAGTAACCGGAATTACCCCCAACTTATTTCCTG

ATTCTGGTACAGGTACGCACAGCGAGACGATTCAGTTAAGGTATGAGGCCATCACCTGGA

AACATTGCGATGGGAATATCATTTACAAAGATTCCTGGAACCACAGGGCAACGGCATAAA

TTCCCCTTAGACTAAAGGCCATTCAAAAAAGTGGCCTTTTCTGAGTTCAACTGATTATTT

AAACCACCCTCGCCAAACAAGCCATCCAAATGCAACCGCATGGTTTGGAGGCATAGTATC

TTGAAGCTATACCTCCTTGAGTAGCGCTAAATTAATTCAACACATTCGATACCTGCATTG

CGATAAGCCCCTATAACTTCCGCTGCTCCAGGCTGGAATAAATCGTTTTAATTTCCGCTT

GTAAGCTTTCGCCACGGTATACCATCGACGTATCGTATCGTTTGTACTTCTCATCACGCG

TAGCGCTAAACCAGTTGAACGATCCTATGCACAGCAGCCCTTCATCACCAATCACGATTT

TACTGTGAACACGGTTGACCAACATAGTCACAATGCCCAGCGCATTTAGTTTTTCCACTG

CATCATTAAGGCGCTGCTGTTTTGCTTTGCGCTTTTCATAACTGACGTTTTGGGTATTAA

AGCTTTTATCCGTTACGACAGTAATGTCGATACCACTTTAAGCACACCTGTTTTAGTTCC

ACGCACTTTTTGAGAGTTCCGGTTTTTCAGCCATCAGCCGGTACTCTTCCGGCGTCAGGT

TGTTCAGGGACTCATGAGGCCGCTCGTTGTTATATTCTATCAGCCAGCGCTCGGTAATTT

CCCGTGCTTCATTCAGTGTTCTGAACAGGTAAAAATCCAGAATTTCTGTCCGGTATGTCC

GGTTGAACCGTTCGATAAAAGCATTTTGTGTAGGTTTACCCGGTTTAATAAATTCGAGCT

GCACGCCATGTTCTTCGGCCCATTGTGCCAGTGCCCGCGAGACCAGTTCTGGCCCGTTGT

CCATCCGCATTTTCAGCGGATAGCCGCGGTTTGCCACGATCCTGTCCAGCACCCGGATGA

TTCGCTGAGCCGGGATATTCCGGTTGATTTCTATCGCCAGTGCTTCACGGTTAAAATCGT

CCACCACATTGAAGGTCCGGAAGCGTCTGCCGCAGACCAACGCGTCGTACATAAAATCGA

TGGGCCAGCTCTGGTTTAACGCTTGCGGTGTCGCCAGGGGTGCTGAATTACGCACTGGCA

GCCGCTGTTTTCCCTTGCGACGAAAATTCAGTTTCAGCAGGCAATAAATCCGGTGAACAC

ATTTATGGTTCCAGGTATTGCCCTGCCTGCGCAGCAGCTGGAACAGCTTCTTAAAACCGT

AGCGCGGATAGCGTTCTGCCAGTTCAGTCAGCGCGTGGATCTCGGGTTCATCACGCCGGG

TATCGGGCTAATAAAAATACACCGTCCTGCTCAGCGATAACGTCCTGCAGGCCTGGCGTA

AACTTATGGCAAATTGCGTCGTCAGATAGCTGACGAGTTCACGCTTTATCGCTGGTTTTA

AAGCTTTTTTTCGATGACGTCTTTCAGTGCCCGGCACTCAAGACTGAGATCAGCAAACAT

CTGTTTAAGCCTCCGATTCTCGTCTTCCAGATCTTTGATTTTTTTAATATCGACCGCTTC

CATCCCGCCATGCTTTGCCTTCCAGTTGTAATAGCTGGCTTCCGAAATAGCGGCCTCACG

GCAAACATCCTTGACGGTACGTTCAGCTTCGACGGACTTCAATACGGCGATGATCTGGTG

TTCAGTGAATCGGATCTTGCGCATAGCGATCTCCTCTGGGGACATAATCAGTATGTCGGA

AGATCTCTAAAAGTGAATGGTTCGTTTTGCCGGGATACTTACAGGTTGACTCAGATTGAC

TTCTGTTGAAAGGAGAATCGCGAAAAGCCTTGCGTAGCGCGGATTTCAGGCACAAAAAAG

ACGTCCGTCGACGTCTATTGATGTTCCGATGGTGCGAAGGCCGGACTCAAATTATGTCGT

AACTTAATGAAATTAAACAGATAATATATAAATCATAAATTATATGCCCCCTTTTGTGCC

CCCAACCATTTTTGCGACCATATCAAACTTAGCTGTTTGATATTACTATCTAATTAAAGA

CTAATGCCCCATTCGGTTAGGATCCGAAACCCGGATCCTAACCGGAACTCAAATACCATA

AAAAAGTTTTTTTGCATTTAACTGTTCACACTGTTCACCTCCTTATTTTTCTTTTTAATA

TCATAATGATAGATGGTGATCAGTTGGTGAAGAGTGAACAGTCAACTCTTCACCTCAGCG

CATCTCTGGCCTGTTTCCGGCGAACATCACCGCAATACGATGGTGATGAGGTGGGGGGGG

GGTAAAAAGTTTTTTTGGGTTTAACTGTTCACACTGTTCACCTTTGGTTTTTTATTAATA

CTTTCATAGTGATACAGGGTGAACATACGGTGAAGGGTGAACAGTGGATTGTTCACCCTT

GAGGGAGGGGCTGACACAAAAAGACCGGCTGTTGCCGGTCTGAGACAGGTTAAGTCGCGG

TGGGTTCGTCGCACTTCGGCAGCCAGTCGCCGTAGCTTTCTTCTTTCAGCGACAGGTTGG

TTTGTATCCCCTGCTTTGTGTGCCGCTTCTCATAATTCATCCCGTACTCTTTCAGCATCA

TGGGCAGTCCCAGCCCGAACATTTTCAGGCTGAGCACGTTCCTGTAGCCGTTGGCCTCCA

TATAGGCCAGATAAGCGTGATAGAGATATTTACGGTAATTACGCGGGATGATACTGGCAT

TCCCCATAAACATCCCGTTGGTCTGCGGTAACATTTCCAGATAGCCGCAAAAATCAAAGG

TCGGGTCAGCGTCGCGTTTAATACTGAGCGCCTCATCGGAGTTCTGCTGCGACTGGAGCA

GCGAACGGGCACTCATCGGGTCACTGAACTGCTGCATTAACTGGCGCACGATGACGGCCA

GCTCGCGGGCGATTTTATCCCTGAGCTGCGGGTCGCGCTCCTCCGGGGCTATCTGCTCCG

GGAAGTGGATAATCACC

>NODE_31_length_16344_cov_181.475586

CTTTGAATGGGTTCATGTGCAGCTCCATCAGCAAAAGGGGATGATAAGTTTATCACCACC

GACTATTTGCAACAGTGCCGGGCAAAGTACGGCGAGCGCGACGTGACCCGTCGCGAGCAT

GCCCAGGAACTGCGCACCTACCTGCAACTGGCCCCGTTCGGCCTGTCCGACTTCCGCGCC

CTGGTGCGCGAGCTAACCGAGCTGGCCCAGCAGACCGACAAAGGCTTGCTGCTGGCCGGT

CAGGCCCTGGAGAGCCTACGGCAGAAACGACGCATCCTGCCGGCGCTGAGCGTGATTGAC

CGGGCCTGCTCGGAAGCCATTGCGCGAGCCAATCGGCGGGTCTACCGCGCCCTGGTCGAA

CCACTCACGGACTCGCATCGGGCCAAGCTGGACGAGCTGTTGAAGCTCAAGGCCGGCAGC

AGCATCACCTGGTTGACCTGGCTGCGCCAGGCACCGCTGAAACCCAACTCTCGGCACATG

CTGGAACACATCGAGCGGCTGAAGACATTTCAGTTGGTGGACTTGCCCGAAGGCCTGGGC

CGGCACATCCACCAGAACCGCCTGCTCAAGCTGGCCCGCGAGGGTGGGCAGATGACGCCC

AAAGACCTCGGTAAGTTCGAGCCGCAGCGCCGCTACGCGACCCTGGCCGCCGTGGTGCTG

GAGAGCACCGCGACCGTGATCGATGAGCTGGTCGATCTGCATGACCGCATCCTGGTCAAG

CTGTTCAGCGGCGCGAAGCACAAGCATCAGCAGCAGTTCCAGAAGCAGGGCAAGGCGATC

AACGACAAGGTGCGCCTGTACTCCAGGATCGGCCAGGCGCTGCTGGAAGCGAAGGAAAGC

GGCAGCGACCCCTATGCCGCCATCGAGGCGGTGATTCCCTGGGACGAGTTCACCGAGAGC

GTCAGCGAGGCCGAGCTGCTGGCCCGGCCGGAAGGCTTCGACCACCTGCACCTGGTCGGC

GAGAACTTCGCCACCCTGCGCCGTTACACGCCGGCCTTGCTGGAGGTGCTGGAACTGCGC

GCCGCGCCGGCCGCGCAAGGCGTGCTGGCAGCCGTGCAGACCCTGCGTGAGATGAACGCC

GACAACCTGCGCAAGGTGCCGGCCGATGCACCCACGGCCTTCATCAAGCCGCGCTGGAAG

CCGCTGGTGATCACCCCGGAAGGCCTCGACCGGAAATTCTACGAAATCTGCGCCCTGTCC

GAGCTGAAGAACGCCCTGCGCTCCGGCGACATCTGGGTCAAGGGCTCGCGGCAGTTCCGC

GACTTCGACGACTACCTGCTGCCGGCCGAGAAGTTCGCCGCACTCAAGCGCGAGCAGGCC

CTGCCCCTGGCGATCAACCCGAACAGCGACCAGTACCTGGAAGAGCGTTTGCAGCTGCTG

GACGAGCAGTTGGCCACCGTCACCCGCCTGGCCAAGGACAACGAGCTGCCCGATGCCATC

CTCACCGAGTCAGGGCTGAAAATCACCCCGCTGGATGCGGCGGTGCCGGATCGGGCGCAG

GCGCTGATCGACCAAACCAGCCAGTTACTGCCGCGCATCAAGATCACCGAACTGCTGATG

GACGTGGACGACTGGACGGGCTTCAGCCGCCACTTCACCCACTTGAAGGACGGGGCCGAG

GCCAAAGACAGGACGTTGCTGCTGTCCGCAATCCTCGGTGATGCGATCAACCTCGGGCTG

ACCAAGATGGCCGAGTCGAGCCCCGGCCTGACCTACGCCAAGCTGTCCTGGCTGCAAGCC

TGGCACATCCGCGACGAAACCTATTCGGCGGCCTTGGCCGAGCTGGTCAACCACCAGTAT

CGCCACGCCTTTGCCGCCCACTGGGGCGACGGCACGACCTCATCCTCCGATGGCCAGCGC

TTCCGCGCGGGTGGCCGGGGCGAGAGCACCGGGCACGTCAACCCGAAGTACGGTAGCGAG

CCGGGACGGCTGTTCTATACCCATATCTCCGACCAGTACGCGCCGTTCAGCACCCGCGTG

GTGAATGTCGGCGTCCGCGATTCCACCTATGTGCTCGACGGCCTGCTGTACCACGAGTCC

GACCTGCGGATCGAGGAGCACTACACCGACACGGCCGGCTTCACCGATCACGTCTTTGCC

CTGATGCACCTGCTAGGCTTCCGCTTCGCGCCGCGCATCCGCGACCTCGGCGAAACCAAG

CTGTACGTGCCGCAGGGCGTGCAAGCCTACCCGACGTTGCGCCCGCTGATCGGCGGCACC

CTGAACATCAAGCACGTGCGTGCCCACTGGGACGACATCCTGCGCCTGGCCAGCTCGATC

AAGCAGGGCACCGTCACCGCCTCGCTGATGCTGCGCAAGCTCGGCAGCTACCCGCGCCAG

AACGGACTGGCCGTGGCCCTGCGCGAGCTGGGCCGGATCGAGCGCACGCTGTTCATCCTG

GACTGGCTGCAAAGTGTTGAACTGCGCCGCCGCGTGCATGCCGGCCTGAACAAAGGTGAG

GCGCGCAACTCGCTGGCCAGGGCGGTGTTCTTCAACCGCCTTGGGGAAATCAGGGATCGG

AGCTTCGAGCAGCAGCGCTACCGGGCCAGCGGCCTCAACCTGGTGACGGCGGCTATCGTG

CTGTGGAACACGGTGTACCTGGAACGCGCCACCCAGGGGTTGGTCGAGGCCGGCAAGCCG

GTGGACGGCGAGCTGCTGCAATTCCTGTCGCCGCTGGGCTGGGAGCACATCAACCTAACC

GGCGATTACGTCTGGCGGCAGAGCCGCAGACTGGAAGACGGGAAGTTTCGGCCCTTACGG

ATGCCCGGAAAACCTTAGCGTACGATTTTTTCCGAATTCTGCGGGCTCCCCATCAACACG

GATAAAGCGCCCGCCTATGGTCGCGCGCTTGCTCTGCTCAAACGCGAAGGCCGGTGCCCG

TCTGACGTTGAACACCGACAGATTAAGTACCGGAACAACGTGATTGAATGCGATCATGGC

AAACTGAAACGGATAATCggcgccacgctgggatttaaatccatgaagacggcttacgcc

accatcaaaggtattgaggtgatgcgtgcactacgcaaaggccaggcctcagcattttat

tatggtgatcccctgggcgaaatgcgcctggtaagcagagtTTTTGAAATGTAAGGCCTT

TGAATAAGACAAAAGGCTGCCTCATCGCTAACTTTGCAACAGTGCCCATGTAGCCTATCA

GCATGTCGTACCTGTCACATATACGTTCGTTTGTGCGTGAAGGTGGAGGGATGAAAAGTT

GGCAGTTATCGCAGCTACCCGGTCACTACCCCATGACATAGGTACTCACTCTTTCCATTG

ACCCTCTCCCATTAACTAAAGCGTGAAACGATTGAGGTATGAGTAGATGGTAGTCCCGTC

TTCTTTTTCTATTATTTCTTCTCCGCCTATAAACCTCTGCCCCAATGAAATTGAAGGAGT

ATTACCATTATCAACAGTGGCGCCAATAAAAATAGCCTCAACTCCAGCCCCCTTGAGACC

ATTCTTAAACTCGTTGAATGCCTTTTCTACTGTATCTCTACCAACCCCTTTACCTCTAAA

GTCCGCTCTAACAAACCATCCTACATCAGTTGTTCCCTCATCAAGAGAGACAATAAACAC

ACATATTGCGATTATTTCGTCGCGATCATTCAAAGTAGCATAAGTGAATCGGCTCCTGTT

TTTTTCAGGAATATCCATATGGACTAGTAAATCTTCATATAGGGAGGAGCGCTTAAGACT

GATAACGGAATTATTATAAGCATCACATAACGCATTGTATCCTGATTCAATTATCTCGAT

ATTATTCATCTAATTATCATCCAGTTATTAATATTTAAACTAATAAACAACTCTTGTGCT

AAACCCGGAATTAATGACAGCAACGGCGATGAATTGACCTAGCCAGTCGCAATGGAATTG

TCCATGCCGATAGTGAGTACCGTCTGGCTATCTTTCACAATTCGGATGAACTCATTTTTC

CCGAGCACCCTGATTAACCTGCTGATACCTTTTCCACCACGTGAAACCTTTATCTGCGCC

TTAATTTTTTCCGGGGCTATATAGCTATTCAACCCTTCCACAGAGCACAATGCATAAAAT

CGCAGATTCGCAGAATGACTCAGAAAATTGGTTTTCCGGTCAGGGCTCATCCATCCGATC

ATGTCCAAGATATCATCATTGTTACCAACGGTGCAAAACTGGGTCTTCCGCAACTTAGGT

GGAGTTGTTTAAGCCAGAGGGCTCATGACTCGTCGTCGAAGTAACTCGAAGCCAGCTCGA

CCGTACATCTGTCGTTTCAGCATCTTCAGGCGGTTTACATGGCCTTCCACAACGCCATTA

CTCCATCTGCTGCTTATCGCTTCGTGTATTGCTGTTGCATCCGCTTCCATACTGGCCGCA

ACACGCTGAAGGTCAATGAGCCCACTTTGACTTACGTCAGTGAACGATTGATTTAACTGC

GATTTATTCTTCGTTTTCAGCATTCGATAGAAGTCGAGCGACAGCTGTTGCGCCATTTTC

AGTTGCGGTTCTTTCTGGCACATCGATTCGATGAAGCGGGATGCATAGTTTTCTTCTCCT

CTGATCATTCGCCAGGGCATTAACCAGCGGCTTACCCTGGATGCTGAGGGGAGTCGAACT

GGGGCGATAACGGGACTGTTAACCTGCTTACGCCACTTAGCCACAACATCCCTGACCGTC

GTTTCGCTCCCGGTGAAGCCAACATTTACCATCTCCCTCCAAGCCTATATTTGCAACAGT

GCCAGTATTCTCCTCCCAGATGATACTAGCTGAATGATTTCCATCGAATTACTGTAATGT

AGTACCACCCGCAGAAACGCCCAAGGTATTGGCCGGATGTTATGCGGTCGAGAAACGCAT

GACTCCACAAGATACGCACAGGGTTGTTGTTTATCCATCTCTCGGGCTAGTGTATCCATC

AGGGCGGATTTGTTTTTATCACCATTTTGTCTATAAGTCAGAAAAGGAATAATGTTGGGA

AAAACAGTTATCAAGGGAATCGGTAACAGCAGCATTATCTTAATGAATAAATCCCACACA

AAAAATACCTTACTCATTCGACTTCGTGTTATACATACCAGTATTTATAACAGTTTTAAT

CATCTAAATAGTCTTTTCAAGTATAGAACGTTATATTGAACATCAAACAGTTATTAAGGC

TGGGATTGACTAAAGCGTTTTCTTTTCAAATACAATATGACGGTGTGGCTTTACAACAAT

ACAACTGATGCATGAGCCATCTCTTTGAGTGGATCAATAGCCCGGCTCTGCATCAGTTGG

AACAAGCCGAATGGAGGTTGCCAATTTTCACGACTTATTCAATCACCGTAATTACTCTCC

ACAATAAAACTAGGCCTGTAGCCGAAGATTTTGATGATGAGCTTGAACTGTCACAGAGCC

GGTGGTACCGAACACTTCAAACGTATGAACGTAGGCGGGACGTTAGCTTATTGATAGTTC

GTAGGAGTAAATCTCACCAATTCCAATTGTACGGTTGATGGATTTTATAGGATAGTCATA

TATTGCTCCCAATTGTTTTTCAACGCTATTATTTGGATGATTGTTAATTAAGAAAACGCA

GATACCGATAGCCGTAGGCTTTGTACCTAAGGATGTCAGCACCAGTCTTGGGTTTTCTGC

ATATATATCTAATAAGGTCTGATATACGGCGTAAGGGTTTGCACCAGGACAGGTTCTTAG

ATCTGTCTCCATGCTGTCGAAATGTAATAAATGCTTTCTGAGTGATTTGTTCTCCCAGCC

TGGGATATAAGCTGGGACTGATATACAAGCCAGTAATTTATTGAAGCTTGCCCCATCATC

ATTACTTAAAATCTGGCCTAGACGAGAGTTTTCAAATCCTAAGAATGAAACCAGGCTGGT

TTTTTGTAAGCCAGATGTGATTGTATTCAGTGAAAATACGGGAAGAGAAGAAAATGGCTG

TCGGCCATCGCTTAATTGATACTCCTCATCCCCGCCCTCAGTCGAAGGCGACTTACTGTA

TTCTTTCGGTTCAATGTAGAGAACAGTAAATGATTCTATACCTTCAATCATATTAATGGA

GTAAAAAAGATACAATATTTCAGGGAAATCAAGAGAAGTAGAGTCTATTATTACTTTTTT

AGGCGACATAGAGATTAATGCATCCTTCAATGCTAACAATTTGTATTTATTACCATTGAG

TTTTAATGCATATTCATCTTTTACATATTTAACCTGAAATGCATTGCTTGCGTTTACTTT

TTTTATCGCCAGGCCAGTTCTCTCATCTAACTCTTCACCATAGAAAAAAATGTCATGATG

GCGATTAGTAAAATCTAAGTTGTTGTGAGTTCTGATACGTTTGAATTTTATCATAACAGG

CCCAACTGGTATGATGTGACTGAACTAGAAACATCAAAAGATGAGTCATCGATATCCCAC

CGGGCTCCATATTTCTTTAACAAGGATGAAAAATCTTCATCACTACCTACAAAAATGGTT

TCAACCTCACCTTTGCTAAATTTTATTTTTTTCTTTTTTCTGTGGCTTATTCCAAAATAT

GGTGCAAGAACTGGATGTAAGACGTAATCATTGAGTTCCAGGTTGTCAGTTGATTTACTC

TTCGTTCCTTTCTGTTCAATCAGCACGGACCACACCAATGATTCATTTAGGATTTCCTTA

ACATTATAAGCAAGAAGATTTATATCAGTTAAATCTAAAGTGAAATGGTTTACTTCTGAT

TCGCTCTGAGAACGTCGAGATTGGCAATAGTTGAAAATCGCACCAAGTCTTTTAGCCACT

CTTTTTAGATGCATTCCATGAGCACCAAAATCTCCTATTTTTTCAATTTCGAGTTCACTC

GTCTTCAGGGTGGCCTCTAATTGAGCTTCGATTGTCATGGATGGTATCGTTTTTGGCGGC

AGTGGAGACGTGATATTTGTTTTTGTTACCGACTGGTGACATAACTCCAGAAAATGTCTG

ATGTTCCCTCTTGATAAATATACAAACTGTTTATAGCCAGCGTACAGTGGGCAGATTCTG

GTTGGTAATTTATTATAAAGATAGAGAATTACACCGACGAGATTGTTAGGTATCCATGAT

TTATATTTTGTTGTATGTCCTGCTTTATATTGCAAATATTGTTCTAACACCTCGTCTGGG

CTAATACTTTTCCTATTCAGCAATGCACCATTTATCAGGCTTGCCTCAGGAAATTTATCA

TCTATAAAATATTGAACTTGCAATTTTGACTTTGATTTAGACAAACCGGTTTCAATCATT

GAATGTAATTTTTTAGTTAATGCGTCATCACTGAATATTTCATGTGATATCTCTTTTGTC

GATTTTTCAGGAAGAAACTTACTGGCCAGATTTTTAATTGAATCCTGATACTCCTTCGTT

TGTCTGTGCGGGATTTGATGTTCTGACGTAAATATGGAACGGAGTTTTTCATGATCAGTG

TTTTCTATATAATCTGAAAAGCGCAGGGCTAATATCTCACCAGCAAATGTATCAAAGTCA

TTGAGATACAGTTCTTCTAAGTCTATATATCTGAAATCATGCTGCTCAACAATGCTTTCG

TTGCCTAACGTTTTATGTGAAATATTAGCATTTTTCTTATAGGCAACACTGAACAGTAAC

GGCATGGATCCGTGCTTCATTAAAGTATTGATTATTGCCTGCTGGTCTGATGTCAAGTTC

TCGAACTCGTCAATGTAAACTTGAAAATTAGGCTTTATAATGCATCCAGTTATTGCATGT

AGTTTGCTAATGATATTCTGTAATGAAAATTTTGTATCAAGAGAAAACGGTGGTGTTTCA

GTAACTGGGGCATTTATCCAATTGCAAAGAGTAAACAGTCTTTCATGTAAAAGATCGCTA

ACATCAACAAGTTTCGCATTTTTATCAATGCCCAAACCTTCAGAAATTGTATCTGGCAAT

TTCAGATTATTAATCTTCTCTTTCAACGAAAAAACAGGAGATTTTTCGGACAATAAATTA

TTGGTTAGTTTAACAAACTCAATAATCAGCGATAGACTCATGTACGTTTTGAAAGCTGTT

GACCAAAATTTTCCGAGCCAAGCTTCGGTTAATAACTGGCTAAAGGATGTATCCGGGCGC

CAATATATACCCAGATTGGAAAGATCCTCAATACCAATCGTATCTTTATTCACACTTAGA

GCTGTCTGGTGGCAATGATACTTTAAGAACATCGTTTTTCCATATCCTCTCCCCCCAATA

ACTATACTTGCTTTTGTCGTTTTTTTTAGATTTACATCTTCGTACCCTAAGGGAAGAACA

TATTTACCATAGAGATCATCAGGTAATTCTTCGGCACGGTTTTTCGAAAAAATCTCGTTA

AATTTCATATTTTACCTTTTGAATAACCTATTCCATCCTTCATTTTCAAACCAGAGGAAT

GAAAGATTATTATTTGGAGTTGAGTTTGCCAAGACATAACTAAGCCCCAAATTACCGAAC

CCTAATGGATTGCTTATTGAGTTCTTATTACATATATCAATGTACAATCTTAAGAAGTCA

TTATGTGTATAGAAATATTCTCTATTTATTCTCCTGTTGGATGCTCTAAAGAAACTATGA

TTTTCATCCAAGTACTCAACAGGCCTAATAATTAGGTTTTTATATTTAGATTGTATCCTT

ATTGTTGAATCGCGTAGAGCCGCAAATGGAATGAATATTATTTTCTTTCCAAGTTCATCA

AGATTTGTTTCTTTCATGAAAGTGTCAATTTGAGTGCCAGAACCAAGCATATCATCAAAA

AAAACTATCGCTTTGATTCTTGGTGGCAATTTTTCTATATTTTCAACTTTTACCCCTAAG

TTTTTATCGAAAAAATCTCTTTGTAGGAATGTGTGTATTACATCACCACTTTTAGTGACT

TTACTATCCACATTATTTATTACGGACGTTCGAAACGGAAGATTCCTTGCATGTTTTGGC

GAGTTGATGTCATTCATCCATTTTTCAATATCCTCAATATGGTAAATATCTAACTCCTCT

AAGATCTGTGGGAGAATAATTGAGGATATATTATAGCCCATAGATGTAACAGTTTCTCTG

TTACGATATATCAACTCGCTTAACACAGAGGCTGCAAGATATTTTTCCTTTTCATCCTTG

AAATTATCTAACCAGCGTTGCAGTACTGATACTTTTACATTATCCCAGTAACCAATCTTG

ATTAATTTTTTAGATTGTTCAATAATCGCTTCAGTATCTCTTGCTGTAATATGATCTATT

TTCATGATGTTATTATCGCAGGGGTAGTTTTTTTATGTCATTTAATGTTATGTACTGCGC

TCCAATGCCTTTCGAAATACTTTTAATCCAGTCGACTCCAAATTTCGATTTTAATGCCGC

GGCAACCATTTCACCACATTCGTACTCAGAAGCTTTGATAACAAAAACACAATCTGTAAT

GGAAAAAGAACCGTTTCGTATGATCCCAACTTTCCCCAAACATCTTGTTCCTACACGGGG

TACAACAACATCTCCTTTCACCGCCTGTACGGCTGAACCATTTTCTGCACTGTCATTGTT

ATTTTCAAATAAAGAAAAATCATTATAAAAAGAAGATGAATGGATTATCGCATCATGCAG

TTGAGTTTTTTTCGTTTTGCTGATATTCCCTCTCATAACTTTTATACCTGAAGTTTCAAT

CGTTTTTTCGTTATTGTTATATTTAAAAGAGTTATATTGATGGTCGGCCCTTTCAATAAA

CTCTTCTTTTTTAAGCCTTATCGCTTTATTTTTTTTTGAACTTCTTGTTGTTATTGATGG

GCTTATTGATTTTTTGTTACTGACAGTGAGAATATGAGTCCTTGCTTCAGTTCCCAAAAA

TGCCTTATTATCTAATTCTATAACATCTATATATTTAAATAATGAGGTTATTTTTTCTCT

GAGTGGTTTATATTTCTCGCTTGAAAATATCGTATCAGGTACAACAATTCCACAACAACT

GTCTCGATCAAGCAACTTAAGCGATAACATTAAGAACAAAACCTCAGCTCTGTAATATTT

TGTTTTATGATTTAGTGCCCACTCCTTAAATAAGAACCTTGTATAGGCAGTATGTTCAGC

TGTATAAAAAGGAGGATTGCCAATGACTATGCCATATGTACTGTTTTGTGCCTTTATTTT

ATCAAAACTGGCTGAATGGGTTGCATCTAAACATATACTCGTCGTGTTTTGTAATAGGTC

TAACTTTCTGCAGTTTTCATCATCAATATCAATTCCGTAGAGCTTTGCGTTGTCGTATTT

GAGCGCAGCTGTCATCAACAACGAGCCTTCACCAGCACTTAAGTCAATGATTGTACTTGC

TTCGTCTGATGGTAATGATGAGATAAGCAACTCTGCCACATCCCGGTTTGTATAGTACTG

AGATAGACGTTTTTTTCTTGAAATCGTTTTGCCCATGCTCAACTTGAACTTCCGCCTCTT

CTGCTCTTGTTTTTGGAATGCTACCGCCCTCAGATCATCATGTCTGATAGCCATATCATT

TAACAGATAATTCAAATGTTTTATCTTTGTTAAAGATATAGGCAACAGAGACTGGACTCA

ATAACTTTTCTACTTATTAAAATGTACGTTTGAAAAGTAGACTTCTGCGGTACACTCTGA

CTGACCTGCTCCCCGTATTTTCACACAGACTGCTGTTAGTTACTTCCGCCTTTGGCACAA

AGCAGACGTTAAGACTTACAGCATCGGGAAACTTCTGGATGCCGCGTCAGCGGCATGGAG

GCGCCAGATGAGGTTACATGTGTCTGTGGCGTCAAATGGCGCCGAAAGCCCGGCGTAGCC

GGTTACCGGGCTATAAATTCTGCCACCCTACCCCCTGCCCTGATTAGCCTTAACCATCTA

ACAGCAATGAAGAAGTCAAAGTAATCCCTTTAACCCCGGTGAGCGGGCTTTACGGCGTTT

ACGACGTAAAGGGCGTGATTTCCGGGGCCTTAGCGGCGGCAGCTTGCTGCTGACGCTTAG

GGGGATGTTCATCAACTATTTCAGCGACACCAGGAAACTTAACACGGTAGCTGCAAAGCC

ATACCCGCTCAAAACGTCTCAGGAGCCTCTGTACGCGGTCGGAGTGGTCCCGACAAGGCG

ACAGCCGCAGTCGGGGCGTATCTCCGCGTTAGCGGGCCGGAGGGCCGCTTACGAGCGTGT

ACTAAATAACTGACCGCTGCTCCACTTACAGCGATGAAGAAGAGTAGTTACAACACCCAT

CATTAAAAGCGATGTTGTTCCCCGGCCTTTGGCCGGGGCGGCGGCGCTTTTCAGTGGTGG

GGAGGGGCTCCTGGCTGGCAAACCGGCGCTGGTTTTTATGATGAATAACGTTATGAATGC

TGTAACTAATTTGGTTCTCCGGTCGGGGCCCGTCGCGAAGCGATGGGAGCTCTCTCTGGT

GTTGCCGAACCGGCGCGACCGTCAGGTCGCTGCAAGGGCGGGCATTCTCTGCAGCCTGTC

CACAGGGCAGGCGATGAACAGGTTATGTGTTTACAGGATTTATTAAAGGATCTTTAAAAG

AGGTACAGAGCTGGTGTTTAAAAGGAACCACGCGCCCTGAAAGCCCGACGGCATGTGCTT

TGTGCGTATCACGGTTGTAGCCTAATGAAATACTCCCTTGCAGTTATATGTGGATAACAG

AAATCGGCCGTTAAAAGTGACGCCGGCGATAACATTTAAGGCCACGTTGACGCCAGGAAG

ACCGGAATTATGGTGAGGAATGCAGGCCTGAAGATAAGATAATACGTAGTAGCCGGGCAA

CAGGCGTGCGAAAGCCTCCGGCGCCGGCCGGATTTTTTAAGGAAGGTAATGTTATATGGG

CACAGTGGCCAGTCGCGTGTAGTTGTTCCCGCGCGACAGCAGCATGCGCTCCTGCACACG

GCGCTCAACCTCACGCTTCAGCGCTTCTTTATCGCCCCTGAAGCGGCCGGTGGCGTATTC

GCGGGTCAGTTGCTGACGCACGCGCGTCTCGATGTCATGACGCTGCCGTGATGCATCCCG

CCGTGCAGTATCCCGCTTCCGGCCGTGAGATTTACGCTCAGCCTGATAGCTGCGAAAACG

CTCACGCACGAACCGCCACGCTTTTGCGATCAGCTCGTCCATCTCCAGCGGTTTCAGTTT

CTGCTTTTTGCGCTGCAGGTTTTCCCACTCCACACGGCTGCGGCGCGCGGCCACCACAGC

CACCTCAGAAACGTCAAGCGCGGAAAACAGAGCCGGGGTGAAGGTGATATCGGTCGGGAT

GTTACAGCCGATCTGCGGGTCATATTCCGTCTGATAGGTGATGAGCCCCAGCTCCGCCAG

AAACTTCAGCGCCCGCGTGGCACGGCTGACTGACAGGTTGCCGCTCCTTGACTCGGTGGC

CAGTCCACACTCGATGGCCATATTGGTAATCGAGCGCTGCACGCGATTGGCCAGCGGATC

ATAGTGAAAACACATTGCCTGCAGTAGCGCGTCAATTGCACGCCGGCGCAACAGTGGTGG

CATCCTGTGCCGCTTACCCAGCGAACGCAAAAACGCCACATGAATGGAAAAATCAAAACG

GGACGTGAAGCCTTCGGCTTTCGCCATCAGCTTACGGCAGAACGGCAGGGTCTTTTTCCC

TTCTCGCGGCGTGAAAACCGGGTTCGGGTTTTTAACCTGTGAATAGTGGTTTTGAAGGAT

ATCAGTCACCGCTTCCTGCGCTTATGTTGCACGGAAGGAGCGAATGACACAGAAACTGAT

CTTGAAGTTTTCTGAGCATGTACATATACTCCCTGCATAGAGCAACACGTTCTATGCAGT

TTATGAAGGCCCCGTTAATCTTTTCGTTCCGCCAAGATTGAAGAAGATTATCGGGGTTTT

TGCTTTTCTGGTCCCGGGTAGATACCTCATCAGAACCAGTTCCCTGCCACCTTACGGCGT

GGCACACCAAAAACTCTACTCTCGCAGCAATTTAACACTCATCGGGTAAAGGTTCAAGAA

AGTAAGCCCATTAAGCTATGTTTCTGGCTAATGCTTCGCGGTGGATCAACCGGGACAGTA

CTTCAGCCTGTGTTAACCCATCGTCATGACACATTTTCATCAATATTTCTTTGAGCTGTG

GTTCCAGAAACACTTTAACTTCTTTATGGGTGGCCCTTTTCTTTGCCACTGAAGATCGCT

GTTTATCAGCAGCGCTAAGTGGGTTCCCTTTTCGGTAGGGACGTTTCGATGAGGAAGTAA

CTCCGTTAACGACCTGTGACATCTCTGCCTCCTCAAGCATTAAACCAAATACCTGGACAA

AGATACTACATGTCTTTATAGGCAGCGAGAGCACACATTAATTTAATGTAAAATACATTT

TCCTGTTGGCGCAGAAAAAATGTGTTCAATGTGATCGTTAGTACGATGAATACCAGTCAG

TACCGCCATTCCAGCGGGACTGCCAGTGCCGCAGATAGTGTTGAGCAACGACTGGAACAT

CCCACACGACAAGCACGTTCTCTGAATTGACCCGATCAGCGGCTCGAGTGTAGTTAAAAG

ACCCCACTTCAACATTACGGCCGTCAGCAATAATGACTTTATCGTGCATGATTTTGTACT

GCGACACTGTGCGAACCGGGATACCGGCATTGACCAGAAGATTCATGGCCGCCAGACTCG

CCTTGTTTTGCCTGCCTGTATTGGCTTTCCAGTCCAGAACCACTTTCACATCGAGACCAC

GCTGTTTTGCCCTGACAAGCGCGCCGGCGACTTCGGGTGAGGTGAAGGAATAGCCCATCA

GCCGGATTTCCTGCTGTGCAGAATTAATAGTCTTCAGGACCAGCTGCAGAGCCGTTCCTT

CCGGCGAATACCCCGTCTCGATGCTGGCGGCATACACGGCCGGAACTGGTGGGGGGAACC

GCAGAATTCGGAAAAAATCGTACGCTAAGCTAACGGTGTTCTCGTGACAGCTCTTTGACT

AGGCTTTCTAAGGCCATTCTGATAGCCCTGACTTCCTGAAAAGCCATGGCTAAAATTTGT

GCGGCTAAAAGGGATAACCGATGGTAAAGTAAGTTATCCCTGTCGAGATACTGAAAAGCG

TTATCCTCGTTTTTCCCAAAACTGTTTTGCCAGTTCGCTCAGAGCGCTAGTTAACTGAGC

GACAGATTTCGCACTTTGCAAATTATTCTGCCCGGTCTGTACATTGGTATCAGCAGCATC

GCGTATATTGATAATACTGCGGTTTATGTCTTCACTTACTGCTCCCTGCTGCTCGACCGC

AGTCGCTATTTGCGCGTTCATGTCGGTAATTTCGTTAACGCGTTGGCCAATTCCATCAAG

AGCTGTAGCTGCTTCCTCTGCGTGAGCTACACTCGTGTGCGCTTGCCGACTACTTTGCTC

CATGACTGTAACAGCGGATTGCGCTCGCTCTTGTAGAGCGCTGATCATGCTTTGAATATC

CGTTGTCGATTGCTGTGTGCGAGCAGCAAGACTGCGAACCTCATCGGCGACAACAGCAAA

ACCACGCCCCTGCTCACCAGCACGCGCGGCCTCAATTGCTGCGTTGAGTGCCAACAAATT

CGTTTGCTCGGCGATCCCTCGTATAACGTCAAGAACTTTTGATATCTCGTTACTTTGACC

TTCAAGCTCATGAATAACCTGAGTGGCTTGCCTAATTTCACCTTCAAGGGCAGTGATTGA

CTGGCTTGTGTGGGCTACCAGACGCTGGCCAGATGCCGTCTCAGTGTCTGCTCTTCCGGC

CGCATCTGCAGCATGCTGTGCATTGCTCGCAACCTCTTGAATGCTTGCCACCATTTGGTT

TACTGCCGTTGCTATTTGATCTGTCTCTGCCTGCTGCTCAACTGTAAGTACATTGCTTGA

CTCAATATCCTTTAGTAGGCCTCGGGTGTGTTCGCTAAGCCGATTTGATGCATCACCTAT

GCGACCTACTATGGCGCCTGTTTCAGCTTGCATCATTCGTAAAGCAAACTCTATTTGGCC

AAACTCATCGGTGCGCCCAGTGTAGAGGGATTGACTTAATGGGTTATTGGAAATATTCCT

GGCTCTTTCAACCAGTCTTCCAAGAGGAGAGAGAATAGCCAAAACACTAACAGAGCTTAA

GCTTCCTGACATTAAAGTGGCTAACACCTAGATTCTACGTCAGTACTTCAAAAAGCATAA

TCAAAGCCTTGATAAATATGCATTCCTTCGAAATTCAGCTTTCACCCATTGGGTGAAAGA

AAAGTGCTCAAAAATATGTTAAATTATCAGCTTTTATGACTCGATATATGGTAAAATAAT

AGTAAGAAAAGTAGTAAAAAGGGGTTCTAATTATGATTAATAAAATTGATTTCAAAGCTA

AGAATCTAACATCAAATGCAGGTCTTTTTCTGCTCCTTGAGAATGCAAAAAGCAATGGGA

TTTTTGATTTTATTGAAAATGACCTCGTATTTGATAATGACTCAACAAATAAAATCAAGA

TGAATCATATAAAGACCATGCTCTGCGGTCACTTCATTGGCATTGATAAGTTAGAACGTC

TAAAGCTACTTCAAAATGATCCCCTCGTCAACGAGTTTGATATTTCCGTAAAAGAACCTG

AAACAGTGTCACGGTTTCTAGGAAACTTCAACTTCAAGACAACCCAAATGTTTAGAGACA

TTAATTTTAAAGTCTTTAAAAAACTGCTCACTAAAAGTAAATTGACATCCATTACGATTG

ATATTGATAGTAGTGTAATTAACGTAGAAGGTCATCAAGAAGGTGCGTCAAAAGGATATA

ATCCTAAGAAACTGGGAAACCGATGCTACAATATCCAATTTGCATTTTGCGACGAATTAA

AAGCATATGTTACCGGATTTGTAAGAAGTGGCAATACTTACACTGCAAACGGTGCTGCGG

AAATGATCAAAGAAATTGTTGCTAACATCAAATCAGACGATTTAGAAATTTTATTTCGAA

TGGATAGTGGCTACTTTGATGAAAAAATTATCGAAACGATAGAATCTCTTGGATGCAAAT

ATTTAATTAAAGCCAAAAGTTATTCTACACTCACCTCACAAGCAACGAATTCATCAATTG

TATTCGTTAAAGGAGAAGAAGGTAGAGAAACTACAGAACTGTATACAAAATTAGTTAAAT

GGGAAAAAGACAGAAGATTTGTCGTATCTCGCGTACTGAAACCAGAAAAAGAAAGAGCAC

AATTATCACTTTTAGAAGGTTCCGAATACGACTACTTTTTCTTTGTAACAAATACTACCT

TGCTTTCTGAAAAAGTAGTTATATACTATGAAAAGCGTGGTAATGCTGAAAACTATATCA

AAGAAGCCAAATACGACATGGCGGTGGGTCATCTCTTGCTAAAGTCATTTTGGGCGAATG

AAGCCGTGTTTCAAATGATGATGCTTTCATATAACCTATTTTTGTTGTTCAAGTTTGATT

CCTTGGACTCTTCAGAATACAGACAGCAAATAAAGACCTTTCGTTTGA

>NODE_32_length_21656_cov_39.535049

CCCCGATTAGTTCGCCATCCCGTAGGCCTGATAAGCGAAGCGCCATCAGGCATTAAACAG

GATATCTGGCTATCAATTTTACGGCCCGGGATACCCCGGGCCGTTTTATGCCTGACGATT

ACACCTCATAATCCAGCTCATCCTGCTTTACCGGCGGGACGATCTGCACCTTCTGCACCC

GATGGCTGTCGACCTGCAGCGTGCGCAGCGTATAACCGTCAATCTCAATGGTCTCCCCTA

CCTGCGGCACATGCTGCAAATACTCCATCAACAGACCGGCAACGGTGTGATACTCACGTT

TATCATCCAGCGGCAGCGGAACGTACTGCACCAGGTCCTCCAGCGGCATATGACCATTGA

CCGTCCACGAACCGTCCTGATGATGCTGAATATCGTGCCGGGCATCGATCTCCTCCACCT

CATTGGGCAGATTGCCGGCGATGGTCTCCATCACGTCGCTGAGGGTCACAATCCCCTCGA

CGGAGCCAAACTCATCGACCACAAAGGCAAAATGGGTGCGGGCCTGGCGGAACTGCTCGA

GCGCCGAGAGGAGCGGCAGGCCCTCCGGGAAGACCAGCGGTTGACGCACCAGCGCCTGCA

GATCCAGCGGCTCCTGGCGCAGGGACTGCTGGAGCAGGTCAATAACATGCACCACCCCCA

GCAGATCTTCATTATCTTTCCCGCCGGTCACCACCAGCCGGGTATGCTGATTTTTCTCCA

CCAGGCTGCGGATCTCTTCCTCCGGCGCGCTGAGGTTGATGCGCTCGATATCATGGCGCG

ACGTCATAATACTGCTGACGCTGCGCTGATTAAGGTTCAGCACCCGCTCAATCATCAGTC

TTTCCTGCGGATTAAACAGTGGATGTTGATCCTGATCGGCGACCAGCGACGCCGTGTCAG

CATCCAGTTCAGCTTTTTCTTTCTGCCCGCTCAGCAGATTCATCACCGCTTCGGTAGTGC

GCTGACGCAGCGTCATATTGGCGGAGAGGAAGCGACGGCGGTTAAACTGCGCCAGCTGGT

TAAGCGCTTCAATCATGACCGAGAAGCCAATGGCCGCATATAGATAGCCTTTCGGAATAA

TAAAGCTGAAGCCTTCAGCAATCAGACTGAAGCCGATCATCAGCAGGAAGCTCAGACAGA

GGATCACGATGGTCGGGTGGCTGTTAACGAAGCGCGTCAGCGCCTTGCTGGCCATCAGCA

TCAGGCTGATGGCGATAACCACGGCGACCATCATCACCGCCAGGTGATCGACCATGCCGA

CGGCGGTGATCACCGAGTCAAGCGAGAAGATGGCGTCGAGCACCACGATCTGCGCCACGA

CGGCCCAGAATTTCGCCCCTTTGCGCTGGGTGGGGTTATCGCTGTCTTTCCCCTCCAGCC

GCTCATTAAGCTCGACGGTCGCTTTAAACAGCAGAAACAGGCCGCCAAACAGCATAATCA

AATCGCGGGCGCTAAAGCTGAAGTCGTGAAAAACAATCAGCGGTTTGGTCAGGGTGACCA

GCCAGGAGATAGAGGCCAGCAGCAGGAGACGCATGACCATCGCCAGCATCAGGCCAGTGA

TCCGCGCGCGGTCGCGCTGGGCGGGAGGGAGTTTCTCGGCGAGGATAGCGATAAAGACCA

GGTTATCGATACCCAACACCAGTTCGATAACCACCAGCGTGACGAGACCTGCCCAGATTG

ACGGATCGGCAATCCATTCCATATGTATTAAAACCTGTACGACTGCGGTATGTGTTAACA

CGATCATGGATAAGATGAGTCTAAAATGCAATAACGACGCGGATATCGCCCTGCCGTGGA

TGGATATATTTCCAGTGGATTAAGCGAACCGATAAGAATTATGTTCCGGAAAAGAACAGT

GAAAAAATAACACCATGGCGGCCACCATGGAATAAGCTTGCCGATATCAGAACTTTTTCC

GCTGCGTTTCAGCGAGGGCGGCAAAAGGGCTTCCTCCCTCGGTTCGTCACGGTGAGCGCG

GATGCGCAGAGCAGAAGCGAAGCGCGAAGCCCGCTCACAAAACCGGCAGAATTCATATTA

TGAAGTGAGTGCAGAATAGGGCGGATCGCAGTTCACCGCCGCGGATTCAGGCTAATATGT

CGTCATATCCGGCTGTTTATGCTGAAATATATTGCCTGGCGAAATTTATTATCTATATCT

ATTCTTTCCAGGCATACGCGCGGCGCGGCGGGGCCGGCGGCCAACAGACCCCGATAGACG

GGCCTCTCAGCCACATCGCGCGGCGCAAAGGAACGAGCCGCTGAATAACCTGAACGAAAA

TAAGATTATTCTCACTTCTGACTGTTGGTAAAAGGGAGTTGTGTGTATTCTTTTACGTGA

CAGTGAATTTAAGAATTTGGCGGGCAGATGCCCGGGCAGTATCCGTGTATTATCAGTTCC

AATGGATTTGTGACATGTACAATTTTGCAAAACCGCGTGTTTTGCAACCAAACAGGTGAA

GATGAATATGGCGAATTTGAAAGCGGTTATTCCGGTCGCAGGACTAGGCATGCATATGCT

GCCGGCCACAAAGGCAATTCCAAAGGAGATGCTGCCGATCGTTGATAAGCCAATGATTCA

GTACATCGTTGACGAAATCGTCGCCGCCGGGATCAAAGAGATTGTTCTGGTGACGCACTC

CTCGAAGAACGCGGTGGAAAACCACTTCGACACCTCCTACGAGCTGGAAGCCCTGCTGGA

ACAGCGCGTGAAGCGCCAGCTGCTGGCGGAAGTGCAGGCCATTTGCCCGCCGGGCGTGAC

CATCATGAACGTGCGTCAGGCGCAGCCGCTGGGCCTGGGCCACTCCATCCTCTGCGCCCG

CCCGGTAGTCGGCGACAACCCGTTTGTGGTGGTCCTGCCGGATATCATCCTTGACGGCGG

CACCGCTGACCCGCTGCGCTATAACCTCGCCGCTATGATCGCCCGCTTTAACGAGACCGG

CCGCAGCCAGGTGCTGGCGAAACGCATGCCGGGCGATCTCTCCGAATACTCCGTCATCCA

GACCAAAGAGCCGATGGTGGCTGAAGGCCAGGTGGCGCGTATCGTCGAGTTTATTGAAAA

ACCGGACGAACCGCAGACTCTGGACTCCGATCTGATGGCGGTGGGGCGCTACGTGCTGTC

GGCGGATATCTGGGCCGAACTGGAACGTACCGAGCCGGGCGCATGGGGCCGTATCCAGCT

GACCGACGCCATTGCCGAACTGGCGAAGAAGCAGTCCGTCGACGCGATGCTGATGACCGG

CGAAAGCTATGACTGCGGGAAGAAAATGGGCTACATGCAAGCCTTCGTTACCTACGGAAT

GCGTAACCTGAAAGAAGGCGCCAAATTCCGCGAAAGCATTAAAAAACTGCTGGCCTGACA

GCTGGCGTAAAGATGAGCGGCAGGGCAGAGCCTTTCGGCACGCCGCTCATAACGTTATGC

AGAAATTATTCATAACGTGAATGTTATAACGATTGTAAAGAAACGTATGGCTTCGGAGAC

TTCTGGTAGTTTGTCTCTGGCCTCTGTGGTGCAATGGTCGGAGTAGCGGCAATAATGCTT

TATGAATAGTCACTTAGTGCGACAATTCCTAAAGCGCAGGGAAAGCGGTCAACGTCAGCC

AAAAATAAAACTTGACTGCGATCATGTTTCCGCTTTAAACATCTCACTTGCATGCATAAA

AATGTGAAATGAATTGGCATGCGAGCTGGTACAGACATTACGGATAATCCCTGAGCACGG

CAGTGGACATCATCGAAGGATCACAGGTATATGAACTGGCAACTCATCTCATTTTTTGGC

GATAGCACCGTTTTGCTGCCCAGCGCAGCGGCGCTGTTTATTGTCCTGATGCTGCGTAAA

ACGTCGCGGTTGCTGGCGTGGCAGTGGAGTTTGCTGTTCGGCATCACCGGCGCTATCGTC

TGCGCCTCTAAACTGGCCTTTATGGGCTGGGGTCTGGGTATTCGTGAACTGGATTTCACC

GGCTTCAGCGGCCACTCCGCGCTCTCCGCGGCCTTCTGGCCTATCTTCCTGTGGCTGCTC

AGCGCCCGTTTCTCCGTCGGTCTGCGTAAAGCGGCCGTTATTACCGGCTATGTTCTGGCC

GCCGTGGTGGGCTATTCGCGGCTGGTCATCCATGCGCATTCCGTCTCGGAAGTGATTGCC

GGCCTGCTGCTGGGCGCTGCTGGCAGCGCTTTGTTCCTGGTGTTGCAAAAACGTACCCCT

GATCCGGAGAACGTGAATATCTCATGGGGCGGTGTTGCATGCCTGGTGATGGTTCCGCTT

ATCCTTTTACATAGCGGCAGCAAAGCGCCGACTCAGTCCCTGCTGGGACAAATCGCCACC

GCAGTGGGGCCGCTGGATAAACCCTTTACGCGTACCGATCTGCACAAGCAGGCCTGGTAA

TCGCCATTTGTTTTACAGGGGAAATTAAGTTTTCGCCGGATAATTAGACAAATAAGAAAA

TAATCTACTATATACCCGGTAATTGATAATTCATATTTATGAAATAATGAAGTGCTACTA

CATTGTTATTGCATATTTGCCTGGATATAGCCTTGATCAGACGTTTCTTAAATGCGCTGA

GACGTTACCTGATGCACATTCAATGAATATCCAGACACAGGAAACTATTAGAAATTGTAG

TTGACTATAACGCCATCATCTGATTTTTGCATGATGGTGAGCTATGGAAAAAGACGTTTT

TTTACAGTTAGTTAGCTGCATTTGTGATGTTGTAGCATTACCGGGAAGATTTCTAAGCCT

GGAAATCAGTGAATAATCTTAATTGGTGACCCGCTTATTTTTTGTCAGTAGAACGACAGG

CGGCATTAATTGGCAGATATTCGGTAACAACACTCCCAATTGTGACCGAAATCCCGTAAA

CTTAACGCCGCCAAAAATAATGGCCTGACCAATTATTCATCCACAGGTCGATAAAAATTA

AGTCGTTCAGGTAGTCAGTGCGCTGGTAGCTGTTAAGCCAGGGGCGGTAGCGTCGCTGAA

GCCGCTTGCTGCTGCACAGAGGTTCTCTTCAACGGCTGTAAATATCGACCCGGTCAGGAT

GATCATCATCAATAGATATCTATCAATTTTCTACGGATATCCTCAGAAGTTGGCCAGGAG

CGGCTGCTGATATCGCCTGGACATTAACTTTCCTGTCTCATCCATAGCCTGTAGGGTAAA

ATTCACCTACATTGTGAGCTGAGTGGATGTTATTAGGCTAACAAGCAGCTTAGGGTAAAT

GTACTTGCCTCGCCGGTGTTGCACAGCGAAGTCAGCTGGTGCCGCGAGCGCTTTCTATCT

TGGTATTCCCCTCATTCTCATTGAGATACGACAGCGGGGCTGAAAATGGATCTTGTACAA

TGATAAAAATTGCGCGCATTGCCGTGACGTTGGGTTTGCTTTCCTCCCTGGGAGCCCAGG

CTTACGCAGCCGGGTTAGTGGTAAATGACAACGACTTGCGTAACGACCTGGCCTGGCTTT

CCGATCGCGGGGTCATCCATCTGAGCCTGTCGACCTGGCCGCTGAGCCAGGAAGAGATTG

CCCGGGCGCTGAAAAAGGCCAAACCGTCCTATTCTTCTGAGCAGGTAGTTCTGGCCCGTA

TCAACCAGAGACTGTCTGCCTTAAAAGCGGATTTCCGGGTCACCGGCTACACTTCAACCG

ATCAGCCGGGCACTCCGCAGGGGTTTGGCCAGACGCAGCCGGCGGATAATTCGTTAGGCC

TGGCGTTCAACAACAGCGGTGAGTGGTGGGATGTCCACCTGCAGGGCAACGTTGAAGGTG

GAGAGCGGATCAGCAACGGATCTCGCTTCAATGCCAACGGCGCCTACGGCGCGGTGAAGT

TCTGGAACCAGTGGCTCTCCTTTGGCCAGGTACCACAGTGGTGGGGACCGGGCTATGAAG

GTAGCCTGATCCGCGGGGATGCGATGCGGCCGATGACCGGTTTCCTGATGCAGCGCGCAG

AGCAGGCTGCTCCAGAGACCTGGTGGTTACGCTGGGTGGGGCCATGGCAGTACCAGATCT

CCGCCAGCCAGATGAATCAATATACTGCGGTGCCGCACACTAAAATTATCGGCGGGCGCT

TTACCTTTACGCCGTTCCAGTCACTGGAATTAGGTGCTTCGCGCATTATGCAGTGGGGTG

GGGAAGGACGCCCTGAATCGTTCAGCAGTTTCTGGGATGGTTTTACTGGAAAAGATAATA

CCGGGACAGATAACGAACCGGGTAACCAGCTGGCCGGATTTGACTTTAAATTCAAACTCG

AGCCGACTCTGGGTTGGCCGGTGAGTTTCTATGGGCAAATGGTCGGCGAGGATGAGTCTG

GCTACCTGCCTTCCGCGAATATGTTCCTTGGTGGAGTGGAAGGGCACCACGGTTGGGGTA

AAGATGCGGTGAACTGGTACGTAGAAGCGCATGACACGCGAACCAATATGAGCCGAACCA

ATTACAGTTATACCCATCATATCTATAAGGATGGCTACTATCAGCAGGGCTATCCGCTGG

GTGACTCAATGGGCGGGGATGGCCAACTCGTTGCTGGTAAGGTTGAGCTTATTACGGAGG

ATAACCAGCGCTGGAGTACGCGCCTGGTTTACGCCAAAGTTAACCCGGAGAATCAGTCGA

TCAACAAAGCGTTCCCTCATGCGGATACTCTGAAAGGTGTACAGCTGGGCTGGAGCGGAG

ATGTGTATCAGTCTGTTCGTCTGAATACTTCATTGTGGTACACCAACGCTAACAACAGCG

ACAGCGATGACGTTGGGGCAAGCGCAGGGATAGAAATACCGTTTAGTTTATAAGGCTGAA

TGCTGAAAACATGGGAGAGAAGGTGGTAGCGCTGCAGGACGCAGTCAGCTTTTTTCTCTC

CACAAGCCGGCAGGGAAGTAACGGCGATGACAGCTGCTCAGGAATTGGCAAATTTTGATT

TACTGATGATGTGACATTATGAAGAAAAAAATTGTTAGATTTTCGGCATTAGCGTTGGCA

ATTGGGTTTTTATCGGGTTGTACCATTATCCCTGGTCAGGGATTAAACAGTCTGCGGAAA

AACGTGGTTGAGCTACCGGACAGCGACTACGATCTGGATAAACTGGTCAATGTGTACCCT

ATGACTCCTGGGCTTATCGATCAGCTTCGTCCAGAGACCGTTCTGGCGAGACCTAACCCA

CAATTAGATAATTTGCTCCGAAGCTATGAATATCGCATTGGTGTGGGCGATGTATTGATG

GTTACGGTATGGGATCACCCGGAGCTGACAACGCCTGCAGGGCAATACCGTAGCGCCAGC

GACACCGGCAACTGGGTCAATTCCGACGGCACCATTTTCTATCCTTATATCGGTAAGGTG

CAGGTAGCGGGCAAAACGCTTAGCCAGGTACGCCAGGATATAGCCAGCCGATTGACCACC

TATATTGAAAGCCCACAGGTTGATGTTAGCGTTGCTGCGTTTCGTTCTCAAAAGGTTTAC

GTGACAGGCGAAGTGACAAAATCAGGCCAGCAACCTATTACCAATATTCCTTTAACAGTT

ATGGATGCAATAAATGCCGCCGGTGGGCTGGCACCAGACGCAGATTGGCGTAATGTTGTG

CTGACTCATAATGGTAAAGATACAAAAGTATCACTTTATGCATTAATGCAAAAAGGGGAT

TTAACACAAAATCATATGTTATATCCTGGAGATATTCTCTTTGTACCAAGGAATGACGAT

CTTAAAGTGTTTGTCATGGGTGAGGTTGGCAAGCAGAGCACATTGAAGATGGATCGTAGT

GGAATGACATTAGCAGAGGCAATCGGGAATGCGGAAGGCATGTCTCAAGCGTACAGTGAT

GCCACGGGAGTCTTCGTTATTCGCCAACTGAAAGGTGATAAACAAGGTAAAATTGCTAAT

ATCTATCAGTTGAACGCGCAAGATGCATCCGCGATGGTTCTTGGAACAGAATTCGAATTA

CAACCTTATGATATCGTCTATGTCACATCGGCTCCATTAGTACGTTGGAATCGTGTAATT

TCCCAACTTGTACCTACCATTACTGGAGTACATGATATGACAGAAACTGTAAGATATATT

AGGACTTGGCCATAAAATGTTTGAATCAATTTTAGTTATTTGTACGGGCAATATTTGTCG

TTCTCCAATAGGAGAACGGCTTTTACGAAAATTGCTTCCCTCAAAAGTGATTGATTCGGC

TGGTACGAATGCAATGGTTGGTTATGGCGCCGATTTGAATGCTTGTAAAATCGCATCATT

GCATAATCTTTCGCTCGAAAATCATGTAGCGAAACAATACTCAGCGTCCATGGGGCGCAA

GTACGATCTTATATTAGTAATGGAAAAGGCCCATATAGAGCAAATCGGGCGCATCTCACC

CGAGGCCAGAGGGAAAACAATGCTTTATGGTCACTGGTGCAACCAGCGAGATATCCCAGA

TCCATATAGGAAAAGTGAAGAAGCATTTGTATCAGTATATAATTTAATAGAATTGGCCGG

TGAGCGGTGGGCTGAAAAACTAGGCACAAAATAATCAGGAATATTTTAATGTCACCAGTT

ATTAATAAACAAGCATCTCAGGAATCTGATGAAATCGATTTTGGTCGCTTAATCGGTGAA

TTGATTGACCATCGCAAATTGATAATATCAGTAACGTCTCTATTTACCGTTATTGCATTG

ATTTATTCCATTTTTTCAACACCAGTGTATCAGGCGGATGCGTTGATTCAAGTGGAGCAA

AAACAGGGTAATAGCATTTTAAATAATCTTAGCCAAATACTTCCGGATAGTCAGCCGCAA

TCTGCACCTGAAATAGCATTATTACAATCGAGAATGATTTTGGGGAAAACGGTAGATGAT

CTAAACTTACAGGCAGTTATTAAGCAAGATTATTTCCCTGTTTTTGGTCGGGGGTTGGCT

AGGTTGCTAGGGGACAAACCAGGCAATTTAACTGTCAGACGGTTATATATAACAGGTAGC

CATGATGAAATCCCGAAAATTAAAATAACAACTAATGATAATAATAGCTATACGGTAGAA

TATAATGATGAAAAGTTCAATGCTAGCATTGGAAAGTTAGTAAATAAAAATGATATCACA

ATTAAAATTGATAAAATAGACGCTGAGCCAGGTACTAGTTTTACTGTATATTATACTTCT

AAATTGGATGCAATAAGTGCGTTACAGAAGAAGTTCAATATTTCAGAACAAGGCAAAGAT

ACGGGTATTTTAAACTTGACTCTTACAGGAGAAAATCCAAAACAAATTAAAGAAATCATC

AATAGTATTAGTGAGAATTACCTTGCACAAAATATCGCAAGGCAAGCAGCGCAAGATGCA

AAGAGTTTAGCATTCTTGAATGAGCAATTACCAATTGTTAGAAGTGATTTAGATAACGCT

GAAAGCAAACTTAATCAGTATCGAAGGCAGAATGATTCGGTTGATTTATCCTTAGAAGCC

AAATCTGTACTTGACCAAATAGTAAATGTAGACAACCAATTAAACCAACTGACTTTTAGA

GAGTCAGAAATATCACAACTTTATACCAAAGAACATCCTACCTATAAGGCCTTACTTGAA

AAAAGAAAAACCTTACAAGATGAAAAGTTAAAGCTTAATAAAAAAGTGTCAGCCATGCCG

GCAACACAACAGGAAATATTACGTCTAAATCGTGATGTCGAATCTGGGCGTGCTGTCTTC

ATGATGTTACTTAACAGGCAACAAGAACTGAATATAGCGAAATCAAGTGCAATTGGTAAT

GTTAGAATTATTGATAATGCAGTAACACAACCTGAACCCGTAAAACCGAAAAAAATTCTG

GTTGTCATAGGCGGTTTTGTTCTTGGCTTTCTGATATCAATTGGTATTGTCTTATTACGT

GTATTTCTGCGAAGAGGAATAGAAACACCTGAGCAACTCGAAGAGTTGGGTATAAATGTT

TATGCAAGCATTCCTATTTCTGAGTTACTTACCCAGAAAGCTACTAAACTAGAGGGTTTA

AGAAGGAAAGAACAATCCGAGCCTCAAACTTTTCTTGCGATTGAAAATCCTGCTGATATT

GCAATTGAAGCGATTAGAGGATTACGCACAAGCCTGCACTTTGCAATGATGGAGGCTAGA

AACAATATTTTAATGATATCAGGTGCAAGCCCTAATGCAGGTAAGACTTTTGTAAGTTCA

AACTTATCAGCAGTAATAGCACAAACTGGAAAATCTGTTCTATATATTGATACAGATATG

AGGAAAGGATATGCGCATAAGCTCTTTGAGTTAGATAACAATAACGGCCTTTCTGAAATA

TTGTCAGGGAAAGTTGAAGTATCCCAAGCAGTGAAAAAAGTACATAGCGCTGGTTTCGAT

TTCATTTCTCGTGGACAGGTTCCACCTAACCCGGCCGAATTACTTATGCACAGACGTTTT

GGAGAGCTTTTAGCATGGGCAGAAAAAAAATATGATATTGTGATTCTTGATACTCCACCT

ATTTTGGCTGTCACTGATCCGGCAATTATTGGGCATTATGCAGGGACAACCTTGCTTGTC

GCAAGGTTTGAAAAAAACACAGCCAAAGAAATTGAAATTAGTGCGAAACGTTTTGAAAAT

AGTGGTGTAATAGTAAAAGGTTGCATCTTAAACGGCGTGGTGAAGAAAGCTAGTAGTTAT

TATGGTTATGGTTATAATAATTATGGTTACTCATATAATGACAAGGATAAGCACTAATTG

AATGCTTACCCCAATTATCTTTATTGATATTTGGGGTAATGGAAAGAAAAATTTATATTA

GTGTAATAATATATATTTTATTAATTTTGAGAGGATTTCATGAGGCTTCTCGTCAAGAAT

GTCATAGTTAGCGTCACATTGGCTTTATCAGATTTCATTTCATTCATTCTTTCTTTATAC

ATAGCATTGGGCGTGTTATCATTAATTGTGGAAAAGAATGATTATTTATTATTAACTAAT

GAAATAGATGGATGGTTTTTACTTCATTGGATTCTCGGTGTTTGTTGTGTAGGCTGGTAT

TCAGTTAGACTAAGGCATTATTTTTACCGTAAAACATTTTGGTTTGAACTTAAAGAAATA

CTTCGAACCTTGGTTATTTTTGCAATAATCGAAATTGCTGTTATGGCTTTTACCACTTGG

TCATTCTCACGTTACTTATGGGTGATAACGTGGTTATTTGTAATCATACTTGTTCCATTG

TCAAGAATGGTAACAAAGACCTTATTGAATAAAGCGGGGATGTGGCAAAGAGATACCTGG

ATAGTAGGTAGTAGTGAAAATGCTCATGAAGCATATAAAGCAATTAGCGGAGAAAAAAAC

TTAGGTTTAAACATTGTCGGTTTCATATCAAGTCCTGGCGGAGTTCCATCAGGAGAGGCA

ATTGATGGTATACCAGTGATTGAAAATAATCTAGAATGGCTTAATGATATTGATCCCAAA

ACACAATTCATTGTTGCTGTAGAGTCTCATCAAAGTAAAATAAGAAACGCGTGGCTTAGA

AACTTTATGATTAAAGGCTATCGATATGTCTCAGTTATTCCAACATTGCGTGGAATGCCT

CTTGATAGCACAGATATGTCATTCATATTCAGTCATGAAGTTATGATTTTTCGTGTACAG

CAAAATCTAGCAAAATGGTCGTCAAGAATTCTCAAAAGACTTTTTGATATTATAGGCTCA

TTGTCTATTATTACTCTTCTTTCACCAGTATTATTATATATAAGTCTTAAAGTTAAAAAA

GATGGAGGCCCGGCAATATATGGTCATGAAAGGATCGGGAAAGGAGGTAAAACCTTTAAG

TGTTTGAAGTTCAGATCTATGGTAATCAATTCCAAAGAAGTTCTTGAAGAACTTCTAAAT

AATGATATAAATGCGCGAGAAGAATGGAATTTAACATTCAAATTGAAAAACGACCCAAGA

ATAACTAAGATAGGCGGTTTCCTTAGAAGGACAAGCCTGGATGAATTGCCGCAGTTATTT

AATGTATTAAAAGGAGAAATGAGTTTAGTTGGACCAAGGCCTATCATTACTGCTGAGTTA

GAAAGATACAATGAAGAAGTTGATTATTATTTATTGAGCAAACCAGGAATGACAGGCCTA

TGGCAAGTTAGTGGGCGTAGTGATGTGGATTATGAGACACGTGTTTATCTTGATGCTTGG

TACGTTAAAAATTGGTCAATGTGGAATGATATCGCGATTTTATTTAAAACTGTGGGTGTT

GTATTAAAAAGAGACGGTGCGTATTAACTTCCAGCCTTTATATAACAGTCGGGATAATCT

ATCAATGAAATACTATATTGCCATACCAACTTATAATGGTGGGGATTTGTGGCGTACTAC

CGTCGATAATATTAAAAAAAATACGCCTGCAAATACATTGGTACACGTAATCGATTCTGG

TAGTAAGGATGATACAGCCACCGTAGCTTTAATTAATGGTTTTGATGTGACATCTATTCA

AAGCTCAGATTTTAATCATGGTGGAACTCGTAACGAAGCAATTAATCAATATATTGAGGA

TTACGATGTAGTCATATTCCTCACACAAGATGCTATACCTGAACCGGGATTTATTGAAAG

CATAATAACTGTTTTTCAAGATGAAGAAATTGTATGTGCCTATGGAAGGCAGTTACCACA

TACTGATGCTAATCCATTGGCACAACATGCCAGAGCATTTAATTATCCAGATAAAGGGTA

TATTGCGTCTAAAAGTAGCATACCTAAGATGGGGTTGAAAACAGCATTTATGTCTAATTC

TTTTTCAGCCTATAGATTATCTGTATTTAAAAAAATAGGCGGCTTCCCGTCGAATACAAT

ATTATGTGAAGATATGTTTTACACGGCAAAAGCAATATTGGCAGGATACAAAGTAGCTTA

TGTGCCCGAAGCAAAAGTACATCATTCTCATAATTATTCTCCATCAGAAGAGTTTAAACG

CTATTTTGACATAGGTGTATTCCATACGGATGAACCTTGGATTAGGAATAGTTTTGGAGG

TGCAGGTGGTGAGGGCAAGCGTTTTATTATTTCAGAATTCAAATTTTTGCTAAAAAATTA

TCCACACTGGATACCCGCCTCATTTTTATATAATGTTATGAAATTTATAGGTTTCAAGGC

AGGTAAAAGTTATCAGTTCTTACCAAGGTTTTTGATTAAAAAATTCAGTATGCATAAGAG

ATTCTGGGGGCATTAAAGTAATCTATAAAATCACATATTAAAAATCTTACTCTTTTATAT

TACGGACTCGAGTGAAGATAAATGAGTTGAGCTGTAAAGCATTCAACTCATTGTTTTTTT

TGCCTTGTAACATGTGAAGCAAATTACTAACTTTTATTTTTCATAGTGTTCTGCTTTAAA

TTGTTTATAACTAGTTCAATTTGATAAATATCATTCGTTAGTACTATCATTGACTAATAC

TAATTATGGTATTTATCTTTTTGTAAATGCCTGTGTCAATATGTCCTCTCGGTTGCGAAA

AGTATTATTTCTATAGTTCATGGCCCTTAAGTTATGGGGCACTAAAAAATATTATATAGT

AATACTAATATGTGAGTTTGAAACATTTCTTATTTTCCAATCTTTAAATAAAATGATATA

ACAAACGCCCAATTTTGTGATTCGAGTGAGGGTAAAATGAGACGTAGAGATTTGCTTAGA

AGCATGGCATTATCACCTTTGGTTATAAGCATTCCTTCAAAAGGTAAAGAAGGTTTTAAA

TCTCATCCTGAAAACCTTGGATGCCAAATTAATACAGACTCAGTAACACCTGAAATGTTT

GGTGCAAAATCTGATGGTGTTTTCAATAATAAAGAGGCTATTGAAAAAGCCCTACAATAT

GCTTATATTAATGGATTAAGTTGTACTTTTTTAAAAGGTCAATATTACAGCGAAGATATT

TCTATTGATTTCCCTATAAGAATTGTTTTACAAAATGGGTGTTGCTTAAATTTTGAGCTT

TCTATTATTGGTGGGCTCTTTTATTCTGAAAGCGAATTTATAATAAATCAAGATTGGAAA

GCTTTTTCTCGCGGAACTCGCTCTTTTTCTAATAAAAACTCTAAAATGAATAAAGGTGAT

ATGGTTTCAGTTTCATTAGATTATCGGCATGGTGGTAGTGCTCAAATTGGTAATGAAAAT

GGCATAGATATTCTGAATGTTGTTGATGTTAATGAAACTGCTTTTATAGTTAAAAATGGA

ACTAGATTTCCATATAGTTACCCAATCATAAGTAAACTTAAAAGCGTTATCGCTTTTAAA

GGCGAAATACCAAAAGAGTCATATACAATTAATGGTGACTTCATAAATAAATTTAGCCCC

GGAGATGTTATTCGTATCGAAAATGTAGACGGTACAGATAGTGTTGGTGGCGGTAAGTAT

TATTTCGAATATGTTGAAGTCAAAAGCGTTAATAACTCTCATATCATTTTGAGTGCCCGA

ACTGTATATTCTCACTCTAATCCGTGGTTAATAAAGACCAATTTTATAAAACATGTTAAT

TTAACAGGAGAAGGGCGCATAAAAAAACTTGTTTTAAGGAATATTAAAGACGTAAAGCTT

TCTTCTTTATTTATTAACCGCCTTATTATATCTAACTGCTATGGAGTCAACGTTAGTAAT

TTAACTTTAACTGGTCTTGGCGAACCGTCTACAGTCAACATAACTTATTGTTTCGGGAAA

AGTATTTTTCAGAACCTACAAATTTCTAATTCTGAAAGTAACAGTGATAATTCAACCTTA

AAAATCATGAGTTCACCTCAGATTATTTTATCGAATATTACAATAAGTGATTCAAATTCA

TCCTCAAAAAAACAAAGTAATTATTCCCTATTTGTCGATTCTTTATACACACCATATTCC

TGCTGGAACGATAATATAATTGTTAATAATGTTATTTGTGAGCGTCCAAGGTCACATTTC

AAACGTGGAGTATGGTTTTATGGTCTACGACGTTCAGTCATTGACTCGATCGTCGGGGCT

GATGTGTTTCTTCAGGGGTCAGTTGACTGTTATTTTAAAAATTTCAATGTATCAAACTAC

ATGTTAGAAATTAAGGATTTAGTAAGATGTGATGTGACTGCTAAATGTATGAGCGCTGTT

ACTAGAGGTGGTATAGACAATGTATTAAGGCTTGAATTTGATGGACGTTTAACCGGAGAT

TTTTCGGACAAGAGTTATTACTGTAAATTTACTGCGGGAACAATAGATCCTGAAAAAGGG

GTTAATTATTCACAAGGAGATGGTAATTATCTTTATTTCAACTCTCCTACTTTAAATTCT

ACTGACAATAAAATAAATTTAAGCGTAGAGTTTCAGAAAAACTTAATTATTGAACCAACT

AGATTATCGTTGGTTAGACAAAGAGAGTCTTTGAAGATGGGTAAAGATGTTTCAAATATC

TATATTAAGAATAACTTTCAAAAAATTTAAATTATTTTAAATCAAATTTAAGGTGTCGTT

AATGGATATCAGTGTCATTATTCCCTGTTATAACCGTGAAGCTAGCATTCAAGGGGCTGT

GCTTTCTGTTTTAAACCAAGTTGGTAATCATAATATCGAGGTTATCGTAGTTGATGATGG

TTCTACAGATGGGTCTATTGATAGATTAAAAGGTTTGAATATAAAAGTTTTGCATACTAA

TGGAAGAACCGGGGCATGCAATGCTAGAAATATAGGAATAGAAGCTGCAACGAATGAGTG

GGTTGCTTTTAACGATAGTGATGACTTTTGGAGAATTGATAAACTTAATTATATAGAGGG

AGCTATTAATTCAAATAACGGTAATATAGATTACATTTTTCATCCTTTTATTCGTGTTAT

TGGACTAAAATCAATAATAGGTGGGGTTTATCATTCTGCATCCGGTGCTATCAAAAACGA

TTTTCTAAAAAAAATGTTAGCCAATAATATGATCAGCACTCAATGCTTAATTTCAAAAAA

AAATACATTAATTGATTGTGGATATTTTGATATTCATTTAAAAAGATTCCAAGATTGGGA

ATTTGCATTAAGAATAGCATGTAAATCTCAAGGCTTCTATATATCGGAACCTTTAGCTTT

ATGCATTGAATCCTCTGACTCAATATCTAAAGGTTTTAAAAAGGGTATTGCAGCACGAGA

GTATATATTCGATAAACATCGATCGATTTATTTAAATAATAAATCTTCCATGTATAGGTT

TTTATTCTCATTACAACTTAGAAAGATTGTTAGTCTATTGAAGAGAGACTGAGATGGCTA

TATTGAATGCTATAAAAAATTTTTCAATACACAAGGGAAAATTAACATCACCATTATTTA

CGTTTTGCTTTATATGGTTTGGTGTTTTTATCCTCTATACTCTAAGTTTATCAGATTTAT

TGATATTTCCTATTAGTGAAATTGCGGTTACAGTAACAATCATTATTGTGCCTTTCTTGG

TTGGGTATTCTCTCTTTACTTCAATAAATAAGTTGGCACCTAAGAAGAAAATAGATGTGA

AGTATAGCGTTGTTGATTTCAATACTGGAGCTGCAAAGGTTTTAAGGAAAACGAGAAATT

TGACTTTCATTTTTTTTGCTCTCGTATTAGTTGAAATTGCAATTGCTGGTTATATACCAT

TAATATCAATGGCTACAGGACGCACAGTTTCCCAATTCGCATTTGGGATTCCATCATTGC

ATGGTTTTGTTCTTGCATTTGGTTGTCTTTTGGTTGCATCTAATTATTATGATTATATAT

GTTTTAAAAATAAAAAATCATTATGGTTCACTTTTTTTATTATTTCTATTTTTGTTCTGC

TCGTTACTAGAAAAATGATTATGGTATCCTTTATACAATTAGGAATGATACATCTAATCA

CAACAAAAATTAGGCCAAAAACAATTTTTTTAGTTGTTTTGTCTGTTTTGTTAGTGTTTC

TATTGTTTGGATATATTGGTGATATTAGAACTGGCAGACAACTATTTATACAATTGGCTC

ATCCAAGTTTTGAATATCCCGACTGGATGCCAAGTGGGTTCATGTGGGCGTACATTTACA

TTGTAACGCCAATAGTAAATTTAACTAATGCTATTCACATGGGACAAACAGATACAAACC

TTAACTTCTTATGCAGCCTTTTGCCAAAAGTTGCGCGAGGGGCATTAGAATGTGTTGTAA

CAGATGAAGATGCATTTGCTAGATCTTATCAAATAAGTGGTGCGTTTAATGTTGGAAGTG

GATATATTGAAATTTTCCTATCCCAGGGAATACTTGGAATGGTTGTTTTTAGCTTTATAC

ATGGCCTAATCTCATCTTATGTATTTAATCGTGTAAAAAAGAAAAAATCAGCAATTTTGC

TTTTCTCTGTTATTAGCCAGATAAATTTGCTCTTAATTTTTGGAAATGGATATTTCAATC

TCAATGTATTAGCACAGATTCCCATGGCAGTTTTATTCTTCAATAATAAAAAATTGAATT

ATATTTATGACTCTAATAACCTTGATGGAGTGATTCGTGAATAATATTATTGCAGTTGTT

TTATATAACAAAGAATTCTCATCATCTTTAACGTTAAATAATTTACTACATATTACTCTA

AATAATACCCATCTAGTCATTATCAATAATGGGCCTAATGAAATTAAATTTGATTCTTTA

TATTATGAATTGAAAAGTAAATTTACAAGTGTGACGTATCTCGAATATCTTGAAAATAGA

TCCTTGGCTGTGATTTATAACACAATAATAAATAATTACAATGAGTACGATCGCTTTATA

TTATTTGATGATGATACAAATATATCTGATCTTTTTTTTCAAGATATGCAAAATTACTAT

AATGTCGATGTGATGTTACAAATCCCTAGAATTATTGATTCGGAACGAAAATTAATACAT

TATCCATTATGTAATGATAAAGTGTATAATGCAGACATTCCATATACTTTTAATGTCAAT

GATAAAATTATTTCAATTGGGTCTGGGTTAGTTATTTATAAAAGTCTTGTTGAATGTTTC

AGGAAAGATAATCTAAAACTTTTTGATGAGCGTTATGCTCTCTACGGAGTCGATTACAGT

TTTTTTCGTAGGATTCAAAGGATAAAAAAACAGTATGATATTCGGGTCCAAATCTTTAGC

ACATTGGAACACTCTCTTTCAAAAACAAATACATCCTTCTCCGAATGGCGGCATCGTGAA

CATTTATATGATTATGCAATTTCGTGTCGCTTTTATTCTAAATCTGGTATTCATATGGTT

TTGGGAATGACAAGATGTTTTCTTAGAGAGATAATAAGCTGTAGGTTTAACAATTTGAAG

TTGCTTACTTTAACTTTTATTAAAGGGCATCATCCCCGAAGTCATTAATTTGATATATTA

ACATCTCTCATACTAATCATAACTTCATAAACTCATATATCCTTAGTGCATACTCAAAGG

CTCGCCTGATATGACATTGCTTTCAAATGCTAAATGGAACATGGCATCACAATTTATCAA

AATGTTAGTGCAACTAACAAACATCGTCTATTTAGCAAAAATTATTCCTCCAAGCGAATA

TGGTTTAATGGCTATGGCTCTTGTTGTTGTGAACTTAGGTATCCTGTTACGAGATTTAGG

CACTTCTGCTGCATTAATACAAAGGAAAGACCTTACTGAGTCTCTAATTAATACTGTTTT

TTGGTTAAATCTCCTCATGGGATTGACTTTATTTGTTCTGGTTTTTTCGGGCTCGAGTGT

GATATCCAGTATCTATCATCAGCCTAAATTAACTTTAGTATTGATGTTGCTTAGTTTTAC

ATTTCCTCTTTCGAGCTGTGCGGCAGCTCACCTTGCTTTGCTTGAGAGAGACTCGAAATT

CAAAACAGTCTCCAGGATAGAAATTTCTTCTTCACTTGTTTCATTAGTACTAGCGATTAC

TTTAGCAAATATGGGGTTTGGTGTTTTCAGTCTTGTTGGTCAAGCTTTAATACTTAATCT

GATGTCTGCTATACAATTCTGGCTTGCATCAAATTGGAAACCTTCTATTAGGGTTTTTAT

TAATTATAAGGATTTGAAAAGTATTTTCAGTTTTAGTGCAAATTTATCAATGTTTAATTT

TATAAATTATTTTTCAAGGAACGCAGATAGCTTTATTATTGGTAAATTCATGTCTGCTTC

AATTCTCGGGAGTTATAATCTTGCTTATAGAATTATGCTTTTCCCATTGCAAAGTCTTAC

CTTTGTCGCAACTAGGTCACTTTATCCAATATTAAGTAAACAACAAAGTAATAATCAGCA

TATATCAAAAATATATTTAAATTGTGTCTATGTTGTGTTGTTTATAACATGTCCATTGAT

GTCTGGACTGGCATTTTATAGTGAGCCTTTTATCCGATTGATATTCGGTGATGAATGGTA

TCTTACGGGAATAGTATTAAAATGGTTAGCGCCAACAGCAATTATACAAGCGGTACTTAG

TACTTCTGGTTCAGTTTTTATGGCTAAAGGTCGTACAGACATTTTATTAAAGCTAGGCAT

TATTGGAATGATCTTGCAAGTGGGAGCTTTCATCATAGGTGTTCAATATACAATAACTAC

ATTTGCTATGTGTTATCTTCTCGCTAATGTTATTAATTTTTTCCCTGTCATGTGGTCTTT

AATGAGTTTGTTAGGGGAGAGTCTCAATGTTTTTTTTAAAAAAAACTATTCAATTGTTTT

GGCTACATTAGTCATGTTAAGTTACTTAAAACTCATCGATTATTTCTTTTTCCCCAATGC

TATTGCGAGCCTTAATATTTTAGTACTATTATCCTTTTCTGGCGCCGTTGTTTATTTATT

AGTCTCTCTCACTCTTTCCGCAACTCTTAGAAAATTTGTGCTATCAAAGATTAAAAAATG

ATTGTCGTTCACAACAGTTCATTTTTAATCCAACTATGATTTGGTTATGGTTTTTTTTTG

ATTAAATAGTTTTTAAGTTTAATGAAAGCTAATTACACATTTTTGTTATACTTTTAATCA

AAAATTATAGTATAACTAGTTAACTGGTCAAGGTCAGTTATTAATGTGATATTGTTTGAT

TCACCTACAGGAGTATGTAATGTCCAAGCAACAGATCGGAGTTGTCGGTATGGCTGTGAT

GGGGCGTAACCTAGCGCTGAATATCGAAAGCCGTGGTTATACCGTCTCCGTTTTCAACCG

CTCCCGTGAAAAGACCGAAGAAGTGATTGCCGAAAATCCAGGCAAGAAACTGGTCCCTTA

TTACACAGTACAAGAGTTTGTTGAATCCCTCGAAACACCACGTCGTATCCTGTTGATGGT

GAAGGCCGGGGCTGGCACCGACAGCGCCATCGATTCCCTGAAGCCTTACCTCGACAAAGG

TGACATAATCATTGATGGCGGTAACACCTTCTTCCAGGACACCATCCGTCGTAACCGTGA

ACTGTCTGCCGAAGGTTTTAACTTTATTGGTACCGGTGTTTCCGGTGGTGAAGAGGGGGC

TCTGAAAGGGCCTTCCATTATGCCTGGTGGCCAGAAAGAAGCTTATGAGCTGGTTGCTCC

AATTCTCAAGCAGATTGCTGCAGTTGCTGAAGACGGTGAGCCATGTGTGACCTATATCGG

TGCTGACGGTGCTGGCCATTATGTGAAGATGGTTCATAACGGCATCGAGTATGGCGACAT

GCAGCTAATTGCTGAAGCTTATGCGCTGTTGAAAGGCGGTCTGGCTCTTTCAAACGAAGA

GCTGGCGCAAACCTTCACCGAATGGAACGAAGGTGAACTGAGCAGTTACCTGATCGACAT

TACCAAAGATATCTTCACCAAGAAGGATGAAGAAGGTAAATACCTCGTTGATGTCATTCT

TGATGAAGCTGCAAACAAAGGTACCGGTAAGTGGACCAGCCAGAGCTCACTGGATCTCGG

CGAACCTCTGTCTCTAATCACCGAGTCCGTATTTGCTCGTTACATCTCTTCGCTTAAAGA

CCAGCGTGTAGCTGCTTCGAAAGTGCTGAGTGGCCCGCAGGCTCAGCCGGCTGGTGATAA

AGCTGAATTTATCGAAAAAGTGCGTCGCGCGTTGTACCTCGGTAAAATCGTTTCCTATGC

TCAGGGCTTCTCCCAGCTGCGTGCTGCTTCTGACGAGTACAACTGGGATCTAAACTACGG

CGAGATCGCTAAGATTTTCCGCGCTGGCTGCATCATTCGTGCACAGTTCCTGCAGAAGAT

CACCGATGCTTATGCGCAAAACGCTGGCATTGCTAACCTCCTGCTGGCGCCGTACTTCAA

ACAGATCGCTGATGACTATCAGCAGGCGCTACGTGATGTCGTGGCTTATGCCGTGCAGAA

TGGTATTCCGGTACCAACGTTCTCAGCCGCAATCGCCTACTATGACAGCTACCGTTCCGC

TGTTCTGCCCGCTAACCTGATTCAGGCTCAGCGTGATTACTTTGGTGCGCACACCTATAA

GCGCACTGATAAAGAAGGCATTTTCCACACTGAGTGGTTAGATTAATATTTATCTTATTA

GGCCTCCAATAATTTATTGGGGGTCTGATGTTAAAGTACATATATAATCAAGTTCTATTC

TGACAAATAGCGGGAAATTAAGAGTTTCGCTATTTGTTTTTATAGTGTTCCTTCGATATT

ATCCCCATAAAATTACATCTCAAACATTTTAATCTGGAGATGTATGCAATTATTTTCTTT

TTGCATGAGTAATCAAAGGTAAATAAAATATGAAGATTCTTGTCACCGGTGGTGCAGGCT

TTATCGGCTCTGCCGTGGTTCGTCATATCATTGAAAATACCCGGGATGAAGTCCGCGTGC

TGGACTGCCTGACCTACGCC

>NODE_34_length_3499_cov_31.098600

GCATAAACCACCTCATCCCCTTCATCTTTCGGGGCTATGTTGTTGACGTCACCCCGGCAT

CGCCGGGGCGGAATAATCAGGACAGAAAGCCGAGGGCGTTGCCGATAATGCCTAAGCCGA

AAAGGGCGAAAATCAGCCAGACCGGATTCACTTTCTTGTTCAGCAGACGCACCATCAGTA

GCGTCAGGCCCAGCGCCAGCAGGCCGGGGCAGAGCTGATCGAGGATGTTCTGGACGGTCA

TCGTGACGGTGGCGCCGTCTGCACCGGGCGTTTGGGAAACCACCAGCGGCACATTGATGG

TGGTCCATTTGGTCACCAGCACCCCCATGACAAACAGGCCGAGAATGGAGGCGCCTTCGG

TCAGCTTCTGCAGCAGGTTACCGCCCATATCGCTGACGATATTGACCCCTTTACGGAAGC

CCAGTTGCAGGCCGTACCACTTCATTGCCAGCCGCACTGCATTGAAAATAAAGAAAAATA

ACAAAGGTCCCAGAATGTTGCCGGAGAGGGCCAGCGAGGCGCCAAGGGCCGCGGTAATCG

GCCGCAGCGTGCCCCAGACCAGCGGGTCGCCGACGCCGGCCAGCGGGCCCATCAGACCCA

CTTTGATGCCGTTGATAGCGCCATCGTCAATGGCCGCGCCGTTAGCCCGGGCCTCCTCCA

TGGCGGCGGTGACGCCGATCACCGGGCCACACACCGCCGGCGTGGTATTAAAGAACACCA

GATGACGCTTCAGCGCCGCGACCTGATCGGCTTTGAGCGGATAAAGGCGTTTGATCGCCG

GGATCATGTCGTAGCAAAACCCCAGGCCATGAATACGTTCGAAGTTAAAGGAGGCCTGCT

GGAGGTTGGAGCGGAGAAACATGCTCACCAGGTCGCCTTGCGTGATTTTTTTCTGTTCCA

TTTTCGGCTCCATTAGTCGTCAAGCTGGTCAAGGGCGGGGGCAGAGGGGGCAGTGGAGGC

GGCGGGTTCAGCTTTACGCCACTGTGGATTGAGCTGGATGTAGATCAGCGCGATGATGAC

GCCCACGCCGCCGAAGGCCAGCAGGCTGAAGTCGAGATAACCCCCGGCGAGAAAACCGAG

GAAAAAGAAGGGCATCAGGTATTTCACGCCCATCATTCGCAGCACCATCGCGTAGCCCAC

GACGACAATGAAACCACCGGCAATCTGCAGGCCGCGGGTGACGAATTCCGGGATCGCGCT

GAGCATACTGCTGACCATATCCGCGCTAACGAACAGCGAGACCACCAGCGCCGGGATTGC

CACGCGCAGTGCCTGCACCCCCAGTGCGGAGACATGCAGCAGGTCGATGGTGCGAAAGCG

CGCCTCCTCGGCCGCTTTGTCCGCGGCGTGCTGGAACACCACGGTAATGGTACGGGCGAA

AACGGTCAGCACCTGCCCGGCGGCGGCCACCGGCAGAGCAATGGCGATACCGGTGGCAAT

GCTCTGGTGGCCCACAATCACCAGAATGGCGGAGATAATGCTGGCCAGCGCCGAATCTGG

CGACTGCGCTGCCCCCACGTTCATCCAGCCGAGGGCGATCAGCTCCAGCGTACCGCCGAG

CATAACCCCGGTTTTTAAATCGCCCAGGATGAGGCCAATCACGGTACAGGCGATAAGGGG

CCGATGGGTCTGAAATTCATCCAGCACGCTGCCCATTCCGGCAATACAGGAAAAAATAAA

TATGGCTATTATCTGTAGGGTACTAATTTCCATAATTTATGACCTTTAAGGTGTGAGTCA

TCCTGCCTGCTACGGCATATCACAACAGGCGCTATTTTTTATTCGCAGAAAGCTGTTTCG

TTAATTTTGTCGAGAATATTGACTGACGGATCTGATGCGACCACGCGTAAATCGAGTTTT

ACGCCCAGTTTATCGAGTTCACGGAATGCCTGAATATCCTGCGGATCCAAAGAAACGGCT

TTGGTTAGCTGTTTTTTACCGGGTCGCCAGGCCATGCCACCAATATTTAACGTGGCGATC

TGCACGCCCTGGCGCACCATCGTTAAAACATCGTGTGGATTGGTAAATAAATAAAAGACG

GTCTCGTCCTGATATTGCGGGTTATGATAGACCGCAACCGCTTTTTCCAGACTGACAACG

TTTACCTTCATGCCTGGCGGAGCCGCCTGGCGCAACAGGGTCCGGCGAACCTCATCGTTA

AATACATCGTCATTGCAGATAATTATCCGCTGGGCGTTGGCGACTTTTGACCACACGGTG

GTGACCTGGCCATGAATCAGTCGGTCATCAATACGGGCGAGGGTAATTTGCATCAGAACT

CCTCCTCAACGGTTTCTGGCTGCTGCCAGACCACACAGCACTGACTGGCGATGGCCTGCA

GATGCTGGCATAAGTCATCGGCGCTCAGGGTATGCTGGTTATCCACCAGCTCGAGTGCCA

GCGGCAGCGACAGGCCGCTAATCACCCGGATCTGCGGGTGACGCATTGCCAGCCCGGCTG

CGGCATTCCATGGGCTTCCGCACTGCAAATCTACCGCGATTACCCACTCCTCATCGGTGT

GGGCGCTTACTAACTTTTCCAGGTTAATGGCGATATCCGCCGCGTTTTCGCCGGGGACAA

ACGCGACGGCGCTGACGTTAACCTCGCCGTAGACCATGCATACCGAATCAAGCATGGCCC

CGGCCAGCTGGCCGTGGGCGCAGAAGATAGCGTGAACCATACTGCCTCCTTAACCGCGCG

TTTTTCCGCCGGCAATGTTAGTGGTGACTCCGGTGATGTAGCTGGCGCGCGCTGACAAGA

GATAGCAAACAAAATCAGCCACTTCCGAGAGCTTTCCTGCCCGCCCGATGGGAATGGCGT

TTTTGGTATATCCCTCGCGAAGTTGCTCGACGGTGATATTGCGCGTCCAGGCCAGCGCCT

CTTCATATTCCGGTGTCCGCAGACCGGTTTTTTCGAGGATCCCCGGCGCAACGCCGACCA

CGCGGATCCCATATTTACCCAATTCTTTGGACCAGGAGCGGGTAAAGCTGTTGAGCGCGG

CCTTGGTCGCGGCGTAGCAGCTTTGACCTTCAGAACCTTCCAGGCCGCTCTCCGAAGAGA

CATTGACAATCACACCGGCGCGCTGTTTGACCATTTGACGCGCCACCGCCTGCGACATGA

AAAACACCCCTTTCTGGTTGATATTGACCATTTTTTCAAAAGCGGCTTCGTTTAATTCAT

AGCGGCCGGCCGGTGCTTTTTCGTCGACTAATAAACGCGGGAAATTCACGCCAGCGTTAT

TGACCAAACCATCAATACGCGACCAGCGCTGAATAATGGCATCGATAGTCTGTTGCACCT

CTGTCGCGCTGGAAATATCCGTCGGCCAGAAGTGATAATTATCGCCATTGTGATGACGAT

CGCCGCCATGAATATCAATCATCTGGACATGAGCACCTTGTGATAATAATTCATCGACAA

TGGCCAGCCCAATTCCCGAGGCGCCGCCGGTCACGATAATGACGTTATCTTTTAAATTTA

ACCAGGTATTCATTATTCACTCCCATTTCTTTAGATAAAGGGATCCCCCGCAGCGGGTGC

TGCGTGAAATCATATCCTGTGTGTTATTTCAGTAATAACTCAG

>NODE_37_length_8722_cov_30.299358

CGCTCTTACCGCACCCTTTCACCCTTACCTGATCCCGCTTGCGCGGGCCATCGGCGGTTT

GCTCTCTGTTGCACTGGTCGTGGGCTGTGACACCCCCCAGGCGTTACCTGGCACCTTGCC

CTATGGAGCCCGGACTTTCCTCCCCTCCGCCCGTCTCCCCCCGAAGGAGGACGACGACGA

AGCGGCGACTGTCTGGTCAGCTTCGGCGCGCAGTATAGAGGGTTTACCGCCCGTTGTCAT

CCCTCAGTGGTCATCCCAACCTGCAGGGTGGCAGCAATATTACGCGACGCGCGGTAAATA

TTATCAAACGCCCCGCGAAATGCCTCTTCCAGCGTCGAAACGGAAGTTAACACGCTGAAT

ACGGCATCGATACCGTGCTGGTGAACCACGCCGACATCGTGAGTCAGGCTGCCAGCAATA

CCGATCACCGGCTTACGGTATTTCTTCGCCACCCGTGCCACCCCCACCGGCACCTTACCG

TGAACAGACTGGCTATCGAGCCGCCCTTCCCCGGTGACCACCAGTGAGCAGTCATGGATT

TGTTCTTCCAGCTTCAGCGCCTCGGTAACGATCTCAATCCCGCTGCGCAGCTCCGCATTG

AGAAAGGCCATCAGCGCCGCGCCCATGCCGCCGGCCGCTCCCGCGCCAGGGATCGACTTC

ACGTCCACCTGCAGCGACGCCTTAATGACGTCGGCATAATGCGCCAGATTACGATCCAGC

TCGACGATCATCGCCTCGGTCGCCCCTTTCTGTGGGCCAAAGATCCGCGACGCCCCACGC

TCGCCCACCAGCGGGTTGGTAACATCGCAGGCCACGTGAATCATCCTGTCACGTAAGCGC

GGATCGATGGCGGAAAGATCGATCCGGCTCAGACTGCCGAGGTTGCCCCCGCCATGGCCG

ATCTCTTGTCCCTCGGCGTCACAGAGGCGGGCGCCTAGCGCCTGCATCATACCCGCCCCA

CCGTCGTTGGTCGCACTACCGCCGATGCCGATAATGATCCGTTCCGCACCATGCTCCAGC

GCCTGTAATATTAGCTCCCCGGTACCCCGTGAAGTGGTGATGAGCGGGTTACGTTTGTCG

GGCGGAACGAGCCCCAGACCGCTGGCTGCCGCCATCTCAATAAACGCGGTGACGCCGTCG

CCGGACATGCCCCAGCAGGCCTTCACTCTCTCACCCAGCGGACCCGTTACCCACGCGAAA

TGTTCCTTTCCCTGCGTGGCGGCAATCATGGCTTCCACCGTCCCCTCGCCGCCGTCGGCG

ACGGGCAGGGAAACATACTGTGCATCAGGGAAAATTTCCCGAAATCCTTTTTCTATCGCC

TGAGCTACCTCGCTGGCAGAAAGGCTTTCTTTGTAAGAGTCTGGGGCAATGACGATTTTC

ATAATTTTGTAGCCTGACAGCGCCGCGCAAGGCAAGCATAACAGGGCGCGCAGGGCGCCC

TTCTTGTTAGCGAGTGACTTCCACTTTCGCCAGTTTTTCGTAATAGCACGCCAGCGCGCT

ATGGTCTGCAGTACCGAGACCGTCCGCGCGCAGCGCCTGCATCATCTCCATCACCGCCGC

CGTCAGCGGCAGTTGGGCGCCCACGCCGTGTGAGGTATCCAACGCATTGGCCAGATCTTT

AATATGCAGGTCGATACGGAAACCCGGTTTGAAGTTACGGTCCATCACCATCGGGGCTTT

CGCATCCAGCACGGTACTGCCCGCCAGACCGCCGCGAATAGCCTGATAAACCAGATCCGG

ATTGACGCCGGCTTTAGTCGCCAGGGTCAGCGCTTCAGACATCGCCGCGATGTTCAGCGC

GACAATTACCTGGTTAGCCAGTTTGGTGACGTTGCCCGCGCCAATATCGCCGGTATGCAC

TACGGAGCCGGCCATCGCTTTCATCAGATCGTAGTATTTATCGAAGATCGCTTTATCGCC

GCCGACCATGACCGACAGCGTGCCGTCGATGGCTTTCGGTTCGCCGCCGCTCACCGGCGC

ATCCAGCATATCAATACCTTTGGCTTTCAGCGCTTCGCTGATTTCCCGACTCGCCAGCGG

CGCAATGGAGCTCATATCGATCACCACGGTGCCCGGTTTCGCCCCTTCAATAATGCCGTT

TTCACCCAGCGCCACCTCTTTAACATGCGGAGAGTTCGGCAGCATGGTGATGATCACCTC

GCACTGTTCGGCAATCGCTTTCGGCGTCGTCGCGGTCTCAGCGCCAGCGGCGATCACGTC

GGCAATCGCTTCCGGGTTACGGTCAGACACCACCAGCGAGTAACCCGCTTTCAGCAAATT

TTTGCTCATCGGTTTGCCCATAATGCCAAGACCGATAAAACCTACTTTGATTGTCATAAT

GTTCTCTCTCTTCATCCTGGTGATTATTTTTTAAACGCGTCGGCAAGTTTCTGGGTTGCA

GAACGGAAGACGCCCAGATCGCTGCCAACGGCGACGAAGGTCGCGCCCCATTCCAGATAG

CGGCGCGCATCGGCTTCCACTGGCGCCAGAATGCCGCTTGGCTTACCGTGCTTCTTCGCG

CTGGCGAAGATATGCTGGATAGCGCGCTGCACCTCAGGATGGGCGGCATTGCCCAAATGG

CCTAAGGCGGCGGCCAGGTCGCTCGGGCCGACAAACACACCGTCCACGCCCTCGGTCGCG

GCAATCGCCTCGACGTTGTCCACTCCGGTCTGGCTCTCAATCTGCACCAGAATGGAAATG

TTCTTGTTGGACTGGGCGAAGTAGTCCGGCACGGTGCCAAACATATTGCCGCGGTGGGAA

ACGGAGACCCCGCGGATCCCTTCCGGCGGATAACGGGTCGAAGCCACCGCCTGCGCCGCC

TGTTCAGCCGTCTCGACAAACGGCACCAGGAAGTTATAGAAGCCGATGTCCAGCATGCGC

TTGATGATGATGGGTTCATTGGTCGGCACACGGACTACCTGCGCGCTGGAGCTACCTTTC

AGGGCCATCAGCTGCGGAATGAGCGTGGTGACGTCGTTTGGCGCGTGTTCCGCGTCCAGC

ACCAGCCAGTCGAACCCCGCCAGACCCAGCACCTCGGTGCTAATCGGGTTAGCCAAAGCG

CACCAGCAGCCAATCTGCACCTGATGCGCCGCCAGCGCGGCCTTAAATTTGTTCGGAAAA

ATTGCGTTATCCATGATTTTTACCTTGCGTTAATCGTTGCTTACTTCTGCAATTCCATAC

GTTTGATATCGCCAACCACAAACAGGTAGCAGACCATCATCATCAGCGCGGAGCCGCCAA

CAAAAATCAGTGCGCCATTAAATGAGTGCAGTTCGCTCACGATATAGCCAATAACCAGCG

GCGTGGCGATCGAGGCCACATTGCCAAAGACGTTGAATACCCCGCCGCACAGGCCAACAA

TCTCCTTCGGCGCGACATCCGAGATAACCGGCCAGCCCAGCGCGCCAAAGCCTTTGCCAA

AGAACGCCAGCGCCATCAGCGTAATGACCAGCGGCGTGCTGGCCGTGTAGTTACACAGGA

TGATGGACGACGCCAGCAGCATTCCCAGCACAATGGGCAGCTTACGCGCAAAAGTCAGCG

TGCAGCCGCGGCCAATCAGATAATCCGAAAACAGCCCGCCCAGTACGCCGCCAGCAAAGC

CAAACAGCGCCGGAATCGAAGCCACAAACCCCACTTTCAGAATCGACATTCCCTTGTCCT

GCACGAGGTAGATCGGAAACCACGTCAGGAAGAACCATGTAATGGTATTCAGGAAATACT

GACCGAAAAATACGCCTAACATCATTCGGTTAGTCAGCAACTGGCGGATATAGTCCATCT

TCGGCCCGGCCGCCGGGGTGGCCTCTTTTTTATGGTCCATATCGACCACTGCGCCGCCTT

CTGAGATATATTTCAGCTCCGCGGCGGACATTCGCGGATGATCGGTGGGGTTATGCACAA

ACTTCACCCAGATGATGGTGAGCACAAACCCTATTATCCCCATCACGGTAAAGACATGTT

CCCAGCCCAGCGCGAAGGTCAGCCAGCCGAGCAGCGGCGAGAACAGAGCCAGCGAGAAGT

ACTGAGCGGCATTAAAGATAGCTGAAGCCGTACCCCGCTCTTTGGCCGGAAACCAGGCCG

CCACAATGCGGGCGTTGGCGGGAAACGAGGGCGCTTCGGAAAAGCCCAGCATAAAACGCA

TGAAGAACATGGAGACCCCGGCCCAGGCGAGCGGGAACACATCAATAAAGCCTTGCAGGA

AGGTAAACAGTGACCAGAAAAACAGACTGTATGAATAAACCTTTTTCGAGCCAAATTTAT

CCAGCAGCCAGCCGCCAGGGATCTGCATCAGCAGATAAGCCCAGCCGAAGGCGGAAAAAA

TGTATCCCATCGACACCGCGCTGAGCCCCAGCTCTTTCGCGACTTCAGTACCGGCGATAG

ACAAGGTCGCGCGGTCGCCATAGTTCACTGCCGTCACCACAAATATCATCAACAGAATTA

AATAGCGGGTCGGTATTCCTTTTTTTTCATCTAATGTAGAATCCAAAATCATTTAGACAT

TCCTCGGGCACAGAACACCTTTTATAATTGTTTTAAGTGGTTTCTGATTTATTTAAAAGA

CGATATTGAAATTGTCTATTCGCATATCGATCACCTCAAAAACATGACTCAGTATAATCA

GCACGCCCCCGCCAGACACTATGCATACCCACAATATAAAGTTATTATTTAAATCCATAA

TTGTGCTTATGCCATAAGTCATGGGCGCTAATCCACACTTCTTACGATTGCCTGCCCTGC

AGAGGTTAGCGTCATAAAAAGGAGTGATGCCGATCACATTTTAAAATCAACTCAGCTGAC

ATCCTTTATTCCATCATACTGATACGTAGCAAATGAATTAGCGTTTTATTTTATTATTAG

CACCTGTTTGGAGATGACTGGACAATGGCTGACATTGCAATTCGACAACAATCGCCGACC

GCGTTTTATATTAAAGTTGACCCGACAGATAATGTGGCGATTATTGTCAACGATCGCGGC

TTAACCGCCGGAACGCGTTTCCCGGACGGCCTGACGCTCGTCGAGCATATCCCGCAGGGT

CACAAAGTTGCCCTGGTGGATATCCCCGCCCATGGTGAAATCATCCGCTACGGCGAAGTC

ATTGGCTATGCCGTACGCGATATCCCGCAGGGAAGCTGGATTGACGAGTCGCTGGTGGAG

CTGCCCACCGCCCCGCCGCTGAATACCCTGCCGCTGGCCACTAAAGTGCCTGAACCGCTA

CCGCCGCTGGAAGGTTACACCTTCGAAGGCTACCGCAATGCTGACGGCAGCGTGGGTACC

AAGAATCTGCTGGGTATTACCACCAGCGTGCACTGCGTCGCTGGCGTGGTCGATTACGTG

GTGAAAATCATTGAACGCGACCTGCTGCCAAACTATCCCAACGTCGATGGCGTGGTGGGC

CTGAATCATCTCTACGGCTGCGGCGTGGCAATTAATGCGCCGGCGGCGGTAGTGCCGATT

CGCACCATTCATAATATCGCCCTCAACCCAAACTTCGGCGGCGAGGTGATGGTCATTGGC

CTCGGCTGTGAGAAGCTGCAGCCGGAACGCCTGCTGCAGGGCACGGAAGACGTCAAAAGT

ATCCCGGTGGACAGCGCCAGCATCGTCAGCCTGCAGGATGAAAAGCATGTTGGTTTTAAA

TCGATGGTCGATGACATTCTGCAGGTCGCCGAGCGCCACCTGGCGAAACTGAACCAGCGC

CAGCGGGAAACCTGCCCGGCCTCTGAGCTGGTGGTCGGGATGCAGTGCGGCGGCAGCGAC

GCCTTTTCAGGCGTGACCGCCAACCCGGCGGTAGGTTACGCGTCCGACCTGCTGGTGCGC

TGCGGGGCGACGGTGATGTTCTCGGAAGTGACCGAAGTACGCGACGCCATTCATCTGTTG

ACCCCGCGGGCGATTAACGAAGAGGTCGGTAAACGTCTGCTGGAAGAGATGGCCTGGTAC

GATAACTATCTTGATATGGGCAAAACCGACCGCAGCGCTAACCCCTCCCCCGGCAACAAG

AAAGGCGGTCTGGCCAACGTGGTGGAAAAAGCGCTGGGGTCGATTGCCAAATCAGGGAAA

AGCGCCATCGTTGAGGTGCTCTCTCCGGGGCAGCGTCCGACCAAACGCGGCCTCATTTAC

GCCGCAACCCCCGCCAGCGATTTTGTCTGCGGCACCCAGCAGGTAGCCTCTGGCATCACG

GTGCAGGTATTCACCACCGGTCGCGGTACGCCGTACGGACTGATGGCGGTACCGGTGATA

AAAATGGCGACCCGTACCGAGCTGGCCAACCGCTGGTATGACTTAATGGACATTAACGCC

GGGACCATCGCCACTGGCGAAGAGACGATTGAGGATGTCGGGCGGAAGCTGTTCGAATTT

ATTCTCGACGTCGCCAGCGGACGCAAAAAAACCTTCTCCGATCAATGGGGCCTGCACAAC

CAGCTGGCGGTATTTAACCCGGCGCCGGTAACCTGATCGAGAGCGTAAGGATTTAACCAC

TTTTAGCCCGGATCTATCCGGGCTTGTTGGTTAGGGATGCTGGGCGGCAAGAAAAGCGCT

GATCTCCGCCTGCGTCGAGGTGCCTTCCATGGGGCCGCGTTGGCTAATCGCCAGCGAGCC

GCTGGCGTTTGCCCATCTCAGCGCCTCCCGGGGCGTGGCGCCATTGAGGAACAGACTAAC

AAAGGTGGCGCCAAAGCAATCCCCGGCACCAGTCGGATCCACCACCGGCACGCTGAAGCC

GGCGACATGGTGCGTCTCGTTGGCGCTAAAGTAGCTTGCGCCACGCGGCCCGCGTTTAAT

CACCACATGCTTCACGCCGCGTTTCAGTAGCTTATCAACCAGGACCTGCTCATTGCGTTC

CGGATTGAGACCAAAGTAATCCAGCTCGCCATCGCTCGGCAGGAAGATATCGGTGTAGTC

GAGAATATATTCAAAGGCCTGCGACATCTCCGGGATGTTCAGCATCTCTTTGCGAATATT

TGGGTCGAACGATACTGTGCCGCTGCGGCCTTTAATGTTTTCAATCGCTTTACGCATCGC

ATCGATAATACGGAACGAGAATAGCGATGACCCCATAATATGAAAATGCTGACACTGATT

TAGCAACGCTTCGTCAATGTGGTCGGCAGTCAGCAGACCGCAGGCGCTGTTAGGCATATT

AAAAATAAAATCGCGCTGCGCCTGGCTACGATAGCTGACGAAGGCGCTACCGGTAGTCGC

TTTCTGCAGCATAGCGATGCCGTTGACGTTGACGCCGTCTTTCTCCAGCCGCGCAATATT

CATCTCGCCAAATGCGTCGTTGCCCACACAGCTAAACAACACGGAGCCGAAACCCAGCTT

TGCCACCTGATCGGCAAATATTGCCGGCGCCCCGCTGGGATAGGGCCCCCAAAATTCACC

GGGACGGGAAAACCCCTGATTCTCTTCCTTGGCGAGAAACTCCACCAGCAGCTCGCCGAT

GGTGCAAATGGTTACGTTCATCACCGCTCCTGGTTTGTCTTATGCAAAGCCGTGTTGAGC

CATGTCAGGCATTCATTGTTGGTATAGCTGTTGGTCAAACCCGCGGCGAGGAAGCAGGCA

TGGTACTCTGCCGCGACGACCTGAGGGGTCACGACGCTGCTGATCTGCTGTAATTCACCC

ACAGCATAACGTTTCTCGCCATATACCGGCCGGGAAGCGACAATCGCAATGACTCGTTTA

CTCTGGGCCACCGCTTCGCTTAACAAATGTGCCGTAACCTCGTTACGCACGCTTAGCGTG

CCGTCTTCAGCAATGTGATCCACCGCTATCAGCGCACGTGAAGGGCGGTAATGACCCAAC

GCCTTCAGCGCCAGTTCGCCCTCCACAATCCGCCCCTGACCGGACAACACCCCGCCAAGC

AGAACGGTTTCCCCATTTAAAAACTCCTGCGCCAGCGCGACGTGGCCCAGATCATTTAAT

AGCAGGCAAAGCTCTTCTCTGTTGGCCAGAAAGGGGATCACTTTACGCAAAATGGAACCC

TGGCCTAGAAACAGCGTTTCGCCATTTTCTATCTGCGCCGCCACCTGGCGAGCCATTTCC

GTCTCCAGCGCTTTATCTCTGACGGCAGGCGCTTCTCGGGTCATCGCAACCGGCGCGCCA

GCCTGGGCGGTATAAATCGCCCCGCCAAAAGAGCGTTTCAAGTAGCCCTGCTGCTCGAGG

TAGTTGAGATCGTTACGGATTGTCACCCCGGAAACAGCCAGCATTTCTGCCAGATCGTCG

ACTTTGATCTCGCCGTTCTTACGAACGATCTCTGCGATGTCCAAGCGCCTTTTCAGCAAG

CTGGTTGACGGTTTTGCCACGGTTTATGCCTTATTATTTTCTCCTGGAATAACTTTCATT

TTTAAATTTCCCTCTTGCAATGTCAAACCGCGGCTGTAGCCCTATCCCGCCATCAATCAG

CAAATCGATATTAATCATGTAGTTACAAATTGGCACCTTACCAACTTAAACTTTAAAAAA

GAAACCTTAGAAATACTATTAACTTTCATTTTAAAAAGCAATTCATCATTGTGTGCGGTG

GATCACACCTAAAGGCGAGACGATCGTTACATTACTTTCAAACTGAAGGTTATTAAACAG

AAATAACTTACAAGATGAAAACAGAGGACTAAAATGTACATCATTTCCAGTAAAAACATG

CTATTAAAAGCTCAGCGACAGAGTTATGCCGTGCCGGCTTTCAATATCCATAACCTCGAA

ACCATGCAGGTCGTTGTTGAAACGGCGGCTGAGTTGCGCTCCCCCTTGATCCTTGCCGGC

ACCCCCGGTACCTACAGCTATGCCGGCACCGGCAACGTAGTGGCGA

>NODE_39_length_4634_cov_67.127533

ACTCGTGGCTGCAACCCTGCTTACTCAAAATCTATTCACACATGGTTACGTTTTGGGGAA

ATTATGAGGGGATCTCTCAGTGCTCAGCATGTTTGAGTGCTTTACTCGCCGCGGGTTGAG

AAATATGTAAAACTTCAGCCGCACGCGTTAAGGAACCACAAGTCATTACAGCATAAAAGA

TATCGAGATGTCTTAATTTCATTCCATGTAGCCTACTGATTATTTATTTCTACGGACTAT

TCTAACGAATAAAGTATAAATAATCAGATATACTCGTCATAATTCAAATTTTGGTTTAGT

TGTCACGAGAATTAATTCGTAAACGTGCAAGCTAAATAGATTGACTAGGGGAATATACGG

GGTAAGAAAGCGGCTCGGCATACTGCCCTATAATAAATTGTTAGGAGAAGTACGCCGAGT

AGTGTGTAGCTATTAGGTAAAGTATGTACCAATTTCAATAAATATTTTAATTAAGATACT

GTTTGAAATATCAACAATAAAGGCACCGACCATAGGAACGACAAGGAAAGCTTTATGTGA

TGGTCCAAATGCTTTTGTGACTGTTTGCATATTCGCAATTGCTGTTGGTGTTGCTCCCAT

ACCAAAGCCACAGTGACCCGCGCTGATCACGACAGCATCATAATCTTTGCCCATCATTTT

GAAGGTGACAAAGCAGGCAAATAGCACCATGACAACAGTTTGTACAGCAATGATAATTAA

TACTGGCCCTGCCATGCTTGCCAATTGACCAAATTTTAATGACATTAACGCCATTGCCAA

GAAAAGCGATAAAGCAACGCTACCTAATACATCGACGGTCGGCTCAAACACTTCGTGTTT

AAATACATGAGTCAGTGTATTACGGATAATAATACCGACAAATAAACACCAGACAAAAGT

AGGCAGTTGCAGAAAAGTATCTTTAAACAATGCACTGATATAGCCACCAACAACAATACA

GATAATCAGCATTGAAATGGTTTCAATAACGTTATTTGCATTGATTTTTCTTTTGACGCT

TGGTTGCTCAAAAGCTTCAACGATAGTGTCGCGCTCTTGCTCGGTTGTTTTAGGAATAGA

GACCTTTTTCAAAAGATGACGGGCAACAGGGCCGCCAACTAAACCACCCAACACTAATCC

AAGTGTTGCACAAGCCATCGCTAATTCAACGGCGCCTGTTACACCATATTTATCAGCGAG

AATAGGGCCCCATGCTCCGGCATTACCATGACCACCTGTTAGAGTAATTGAACCTGCAAT

TAAGCCAATAAATGGACTTTCATTCATCATGACAGCCATACTCATGCCGACAGTATTTTG

AATGGCGATTAGGATCGTTACTGCAATAGTTAATAGAACTAACGGCTTTCCTCCTTTAAT

CAGTCGAGAAAAGTCAGAACTTAGCCCGATAGAGGAAAAGAATGTGAGCATTAATAAACT

TTGCAATGAAGCATCAAAAGTAAACGAATAACCTGATGTTTTATCAATAATTAACAGAAC

AATTGCAACAATAAAGCCACCAACGACGGCTTCTGGTATGTGGTTTTTTTGTAGGAACGG

GGTAAATTTTACGACAAACATTCCTATGAGTAGCGCGATACATGCGACTAATAATGTATA

ACTGGCATCTAGGATCATTTTTTTACCTCTATTAGTTTACCAGAATTTTCACTATAACAA

TTTAACAATAGTGAAAAATGAAGTTACTTTGGTTAACTAATCTTTAACAATGAGTTTTAT

TAGGGTATCCATAACTTTTAGTTAATAGGGTCATAATTTTAGTGTGATCTTAATCATGAA

ATATTAAAAAGATTAAAATAACAACAATGGTATTTAATGATGGGTAAACCTAAATACCAT

GCGGGATCCGCACTATTTTCGGTGATAGCAAAAAATAAAAAAGTATAAATAATAAACAAA

ATTATAAGAGAAGGAGAACATGATAAGCGCAGGCCGAGCAATTTAAAGAAGTGTGATATA

CAACATAAAACAGCAGCATGACCTTTCTATATTTCGTTGCTTATCGAAGTGTTAATTTTC

GGGTGGATTACTCTGTTTGTTGATTAATAACGGAGAAAAATATGATTGCTGTAATATTTG

AGGTGCAAATACAACCCGACCAACAAACTCGCTATTTGACTTTAGCTGAGGAGTTAAGAC

CACTATTAAGTCATGTAGCTGGTTTTATTTCAATTGAACGTTTTCAAAGTCTAGCTACAG

AAGGAAAAATGTTATCGCTATCTTGGTGGGAAAACGAATACGCAGTTCTGCAATGGAAAA

ATCATGTTTTACATGCGAAAGCTCAACAAGAAGGGCGAGAGTCAATATTTGATTTTTACA

AAATTAGTATTGCTCATATTACTCGCGAATATTCATTTAAAAAGGACAAGGATAATGTTT

GATGTTCACGTTGTTTTAGATAATCAAATAGGACAATTAGCATTACTAGGAAAAACATTA

GGTAATAAAGGTATTGGATTGGAAGGGGGAGGGATATTTACGGTTGGTGATGAATGCCAT

GCTCATTTTCTTGTTGAACAAGGAAAGGAAGCTAAAATAGCGCTAGAGCAAGCTGGACTG

TTAGTACTTGCGATCCGGACACCATTAATTCGTAAGTTAAAACAGGAAAAACCGGGGGAA

CTTGGCGAAATAGCACGAGTATTGGCGGAGAATAACATTAATATTTTAGTGCAATACAGT

GACCATGCTAACCAACTGATATTAATAACGGACAATGATAGTATGGCTGCATCTGTTACG

CTCCCTTGGGCAATAAAGTGAACTTGCGATGGCTAATTTAATACGAAAAGAGGTTACCTT

TGAGTCCTCAATAGCCGCGATAGGGGCGGCTATGTCTGACATTTCACGAGTTAAAATACT

CAGTGCTTTGATGGATGGGCGAGCTTGGACGGCCACTGAGCTAAGTTCTGTGGCGAATAT

ATCAGCTTCAACGGCGAGCAGTCATTTATCTAAATTATTAGATTGCCAGCTAATCACAGT

AGTAGCTCAAGGCAAGCATCGTTATTTTCGGCTAGCAGGAAAAGATATTGCTGAATTGAT

GGAAAGTATGATGGGGATCTCCTTAAACCATGGCGTACATGCCAAAGTTTCCACGCCAGT

GCATTTACGAAAAGCACGTACTTGCTATGATCATTTAGCTGGCGAAGTTGCCGTTAAGAT

CTATGATTCCCTTTGTCAACAGCAATGGATCACTGAAAATGGTTCAATGATCACATTAAG

TGGTATTCAATATTTTCATGAAATGGGAATTGACGTTCCTTCCAAACATTCACGTAAAAT

CTGTTGTGCGTGTTTAGATTGGAGTGAACGCCGTTTCCATTTAGGTGGGTACGTTGGAGC

CGCATTATTTTCGCTTTATGAATCTAAAGGGTGGTTAACTCGACATCTTGGTTACCGTGA

AGTTACCATCACGGAAAAAGGTTATGCTGCTTTTAAGACCCACTTTCACATTTAAGTTGT

TTTTCTAATCCGCATATGATCAATTCAAGGCCGAATAAGAAGGCTGGCTCTGCACCTTGG

TGATCAAATAATTCGATAGCTTGTCGTAATAATGGCGGCATACTATCAGTAGTAGGTGTT

TCCCTTTCTTCTTTAGCGACTTGATGCTCTTGATCTTCCAATACGCAACCTAAAGTAAAA

TGCCCCACAGCGCTGAGTGCATATAATGCATTCTCTAGTGAAAAACCTTGTTGGCATAAA

AAGGCTAATTGATTTTCGAGAGTTTCATACTGTTTTTCTGTAGGCCGTGTACCTAAATGT

ACTTTTGCTCCATCGCGATGACTTAGTAAAGCACATCTAAAACTTTTAGCGTTATTACGT

AAAAAATCTTGCCAGCTTTCCCCTTCTAAAGGGCAAAAGTGAGTATGGTGCCTATCTAAC

ATCTCAATGGCTAAGGCGTCGAGCAAAGCCCGCTTATTTTTTACATGCCAATACAATGTA

GGCTGCTCTACACCTAGCTTCTGGGCGAGTTTACGGGTTGTTAAACCTTCGATTCCGACC

TCATTAAGCAGCTCTAATGCGCTGTTAATCACTTTACTTTTATCTAATCTAGACATCATT

AATTCCTAATTTTTGTTGACACTCTATCATTGATAGAGTTATTTTACCACTCCCTATCAG

TGATAGAGAAAAGTGAAATGAATAGTTCGACAAAGATCGCATTGGTAATTACGTTACTCG

ATGCCATGGGGATTGGCCTTATCATGCCAGTCTTGCCAACGTTATTACGTGAATTTATTG

CTTCGGAAGATATCGCTAACCACTTTGGCGTATTGCTTGCACTTTATGCGTTAATGCAGG

TTATCTTTGCTCCTTGGCTTGGAAAAATGTCTGACCGATTTGGTCGGCGCCCAGTGCTGT

TGTTGTCATTAATAGGCGCATCGCTGGATTACTTATTGCTGGCTTTTTCAAGTGCGCTTT

GGATGCTGTATTTAGGCCGTTTGCTTTCAGGGATCACAGGAGCTACTGGGGCTGTCGCGG

CATCGGTCATTGCCGATACCACCTCAGCTTCTCAACGCGTGAAGTGGTTCGGTTGGTTAG

GGGCAAGTTTTGGGCTTGGTTTAATAGCGGGGCCTATTATTGGTGGTTTTGCAGGAGAGA

TTTCACCGCATAGTCCTGAGAGATCCCCTCATAATTTCCCCAAAGCGTAACCATGTGTGA

ATAAATTTTGAGCTAGTAGGGTTGCAGCCACGAGTAAG

>NODE_40_length_39705_cov_33.978691

GAAAAAAATCGGCCCAGATCCGCGAAATTTTAATCAGCGAGTCAGCTTGGGAAGAAATGA

CCTGCTTATTCGCACCTTCCCTAAATGGATTTGGGTTTGACCGCCGTAAGCGCCACCTTG

CAGGTCGTGGAGGCTTTGGGTGTTGTCAGAGACAACGATTAGGCGTTACGATTCTAAACC

AGTCATGTATAAAAAAACAACAAGCAGCTATGTGGTGAGTTATAAAAAGGGACAAGTGAG

ATGGAAAATTCTATTAGCTTTATGGCAAGAGATGGCGTTATTTCTTTAGATACGTTTCTT

AAAACACGTAAATTTAAGAATGGAATGGGCATCATATTTCTCGACAGAAACGTCGTGAGC

CCTGTAACCAGTAATAGTTTAAAAGACAAATTCTCATCATTAAAGCATTACCGTTTCTCT

GTCATTCTTTCGGCAATGGAAGGAAAGAACAAGCGATTACCGACCCATGAAGAATATATT

GAAGAATATCAAAAATCATCCGAGAAGATAGGACTAGCATTCGGGGAGGATCGGGTAGAC

AGGGAAAAGATAGAATCTTTTTATTATGCAGTGAAAGGCGAGTATGAATCACACATTAAT

GCCGAATATAAATTCCTCGCGCAATCCATTGAGATTCTAAAAGATAAAACCCTAACTGAA

AAAGCAGAGAAAATCATAGAACTAACGCACAGCATTTCAAAAGAGCACCCATCAAAGATG

AACCCGCTTCTGATATTGCTTGTATTTTGTCATTTATACAAAGGACGCGGAAGACATTTC

ATAGACAAACTGTTAAAAGTTAACAAGCAAGAACCTTTAGAACAAAAGCTTCATAATGTT

ATCAGCGACCTAATGATCATTACATTAGTTCTAATATCTATTAGCAGCGAGAAGAAATAT

ATTGCAGAAGCTGATGCCAATAATGGTAAGGTAAAACATCCAGACGGTAGTTCTGTAACA

CTAAATTTTAAACATCGCTTTGTATTCTGTAGTGCTGACGCTGCATTACTCGAATTTTAT

ATGTTGTATATAGAACTGCATGAACACTTACATGTTATATTTCGACATCAAAAAAGAATA

TTAAATGGCGCAATAGAGCCAAGATTACATAGCGTTTGTGCCAAATTATTCCCGGGAGCG

ACCAAGGAAGAGGCAGCAAAATTACTCAATGAAATACACTCGTATATTTTATAAAAGGCT

AATCGTCATGAGGCTCTCCTTTGTTATAAACTCGCGCCACATAATGCCCGCGCCCGTCCC

CGTGCCCCAAATCCATAGAAACCAACGCTTCGGCTTCCTTTTTGCTAAAACCTCTCTGCA

TATGATATTCCGTCGCCTCGCGGGAATAGGCATAGCGCAAACTATGCGGAGAAATCTTTC

CCGTTAGCCCTGCGTCCTTAACGATATTCCGATAGCGATCGATGGCGGAATGGAGATTGG

GTTTATCGACCAGCTTGCCGTTATTATTCATTGCTATTTTAAGCGCATGATTCACGGCCT

GAAGCGTTTTCTCACGATCGACAACCGTCGTATCTCTGGGCTTGCCGCCTTTGGTGCCAA

AAACAACTCGTACGCGCTCATCGCCGCGTAATAAGGCCTGCTGCCAGGTACGCAATGACT

TGGCTGACTGCACGGCCTCTTCCGTTCTTAACCCCAGGCAGCGGGAAAGCTGCACCGCAG

CCGCGACGCCTTCATCCTTGATCTTAATTACAGAAAATACGGCCTGATAACGCTCGTCGG

AAATAGCCACCTTCGTTCCGTCACGACTGGCCCCGGACAACCCAAGCGCGCTATTGCTTA

AACACTCATGGGCGGGATCGGCCAGTTTCGACCTTCCGGCTACGTTAAATATCGCCCGTA

GCGCCGCCATTTCATTCTGCAACGTGCGCTTTGAAATGCTTTCCGCCAGACGGCTGCGAA

TATACAGCTCAACGTGATGAGTTTTAATATGCCTGACGTCCCGGATCTGAATATTCAGAT

TCAGCATTCTCTCCGCCATGCGATCGGCGATTTTCATTCTGTCAGCCACGGTTTTAAAAC

TGCCCCCGGCCTGCCGGGCCAACGTCGACAGGCTTTTACTCAATTTAGACATCAAGACCT

CTGGTTATAAACACGTACTCCCTGTCAGGCTTACCTTTGCCTTGCGTGAGCAAAGGTAAG

CCCCAACCGTTTTAAAGCTGTGCATCTCAACCCCGACGACACGGTTAATTTTGCGCATCC

TGCGGCTCGACTGGTATCTGTGCATCGGGGCGGCGAAATGTTGAGTTCTTACGAGGCTCC

CCAGCTCTCTGAGCTGCTCGTGGCTAACGCCATGCTGACTACTGTCAGGCCGCCTCCATT

GCCAGTTTCTGCTGGCACTGCCGTCGATACCGAGTCGATCTTTCTCCTTTTTTAGTGGTG

GACGTTTTCAAACGGGTTCGGCCCGTTTTTAACGTCGATTGATGAAAAAACATCCTGATT

ATTCCCCTTAAGGCACATTCGCCAACCGGTACTACGTGTCGGTCAGAGCGTAGAGGATGT

TGTTAAAGGCCGAATAGTCTGGGCCCGTGGGTTGCGCGCTGCGCGCGTCACTTGGTATCG

CTAACGCTCTGACACAAGTGACGCCGCGCAACCTTCTGCCGCTAAATGCCTGCCGTAGCA

GATGCCAAATGTTCCAAATGGCATAGCAGACGACACGCAAACGTTGGCAACGATAGCTGG

CTAAATGAATAACACTCATTGCCTGGAGGATGAGCTTTTCAGCTCGAAAAAGAGAACGCC

GTGGAGGCGCTGATATGAAGAGAGTGCCTTAATCGCGGGTAGCGACGCTCGTTGGCAAAG

GCTAAACGGGCTTGGGTTTGACCGCTATTTCAGCGCTACCTTACAGGTCATGGTGGCTTT

GGGTGTTGCCTGTAGCAACGTTACAGCGTTTTTATACTAGCCGTTATTTTTATTGCCAAC

AAGACACTTTTTAGTTATTCATAATATTTATAATTTACATTTGAAAGGATGCATTATGAC

AGATAACACAACCGAAGAATTAAAAGAAATTTTCCAGAAAATCAGTAAGAAAGTCGTTAA

ACTAATTCCTTACCTGACAATTTTGTCAGGCTTAATGGTATGGAGTTATTTAAATAACAT

CGGCAGACTAGATTTACTGATAGATTCCTTTTCCATTAATATCGGATTAGTATCTTTATT

AATATCCGCTGTAGTATTATCTCTCGCAATAGCCATAACACTCATCCTACCCAGTTCGAT

ACTCATTTTTCACTCCTCAATGTTTCCTAATATAATTAACAAACCAATATCTATACCATG

GTTAGGTTGGGGGTTTTCTACTTTATTCTTGATGTTAACATTTCTTCCACACATTCCATC

TATAACAAAAATAATATCACCACCTTCAGCATCATTAATCTTTATCATAATAGCAGTAAT

ATCATTTATCATTTTCTTGGTTATTTCATGGTACAGTGGTGATTTCAAAAACAACGATTT

ATTTAAAATAGCTAAAAATGTCGGTAAAGCACTAATAGAAACATTTACTACAGTATTCGC

CACATTATCAATTGCCATCCCCATTACATTTTTATTAAAAGACAGCACTGGGGAAAAAAC

CACATCACTACTCATAGCACTGGCTTTCATGATCGCATTTGCTCTATCATCTTTTCTTCC

CGCAATAGTTTATTATCGCAATATAAAAAACACATCATCAAACAATGAAAGCAAAAGCAT

CATTCCATTAGCAAAAAACTTATCTATAGCAGTCATTATAACGATAACTATCACGTCCCT

TCTGTTCCCCAATGTAACGACTACCTTAATGAATAGCTCTCTTTACTCTATCGGAGTCAT

TGATAATAAAAATCATTATTTTCTAATAGATGGAGAAAAATACAAGCCAGATATGTTCCC

ACAGAATACATGGAAGACGTCGACAACCGATAAAATCGGACCAGACTTCTTTATCTACGG

GATAAGAATGTTCTCCGCCGGGAATAAAAATTTGATTTGTCCAGATAGCGTTGGTTCCTT

CAAAAGGGAAATTAATGGAACAAACTATGATTTAATCACTTCCTCTGATAATGAAGATAA

CGCAAAAAAACTAAAAGATATGACCAAGATCTGTGTCGTTTTAGACAGCGACAATGCACA

ACAATGGGATACTTTTTTCGAAAATAACGTTCAAAACAAAGGATAAGAATTGTCTGCCTG

TAGCCAGAATTATTATTCTGGCTTTACTTTTTTCGGCTACGATTCAGTTTTAAAACCCTG

ATAAAGAGCCAACACCGCTTCAGCAAACTCATCATCAACGGTATAAAAATAGCACTCTGG

CACATCCAGCACTTTTGCAAAACTACAAACCAGCTCAAATGAAGGCTTGTGCGTTCCGCT

TTCATAATGGGACAAACGTGAATATGCCGTAGCCTCTTCAATCCCAGCCATTACACCTAA

CTTTTCCTGAGTTAGCCCAGCGCGTAATCTGGCATCCTTCAAACGTTTAGGAATCATATT

GTTACCATCAATCAATATATTGACAGTATCTTTAGCATTCCTTAAGATTAATTATCTTTA

GAGTTACTAAAGATGGATTCGCATACTGGAGATAAAACCATGGAAAACAACGACTGGCAT

CCGGCAGACATCATCGCCGGGCTAAGAAAGAAGGGAACATCGCTTGCCGCAGTTTCACGC

AGCGCAGGCCTGTCGAGTTCCACACTGGCAAACGCGCTGCTCCGCCCGTGGCCGAAAGGC

GAAAAGCTTATTGCCGATGCGCTGAGCATCTCACCGGAAATAATCTGGCCCAGCCGCTAT

TTTGACAGTGAAGGCAAACTACTCGCGCGCCAGATAAGGAGTGGAAGAACCAACAAATAA

CGTAAGAATTATTAGCCAATAACACAGTACACCGCCCTCCTCTGCATCTACCCCGTTCAT

CAACATGCAGACGTTGAACGAAACGATACCGCAGAATAAGATGTCAGCTGGTTTATAAAC

GAACAGCATGGATGGCTCGAATGAAAGGAACGGTGAAGTGGTTTAGTCAGGAAAAGGGAT

ATGGCTTTATTACCGCAGAAGGTAATCAGGATTATTTCTTTGGCGTCAGAGATGTTATCG

GCGCTGTTCTGCCCGCCACTGGCTCTCAGGTCACATTTACCCCGGCCACCGGACCCAAAG

GGCCAAAAGCGATTGAAATCACCATTCTTTCGCAGCCTGAGCACACCGCTCCGGATAACA

AAATCAAGTGCCCCCACTGCGCCCGCCAAATAATCCCTCGCTTAGTCACCTACAAAGGTG

AATCGGAAAAGTCCTTATGCCCTTTCTGTGGCGGCACCGTAAAAGATTTTACAGGCACAT

CAATACTGGATGATCTCGGCGATATATTCTGGGGAATGATAAGAAACATTGCCGTTGCCA

TTATCGACACCGCCACGGCCATTGTTATTGAGATCAAAAAAAGTAAGAAAAAATAGTCTT

AAACCGTTCGCTTTCACCACTAATGGCAACTGGTCGCACCGCTTGTGGTCAAAGAGGTAA

AAGCACTTCCACCATCAGAGCGGCGCGACCTTTACCAGAATCTTTTGTAGCAGCGGAGCC

GGTTCAATCCCCAGCAGCCCCGCGATATAGGCAAACTCAATCACATCTAACCTTCTTTCG

CCACTTTCCACCTTGGCAACAAAAGATTGTGGGCGTTTCAACGCCTGCGCCAGTCTTTCC

TGAGTAATGCCTTTCTTTATTCTTATCTCGCGAAGATTCTTTATAACAAGTTGATATTCA

GATGAATATATTGATGACATGGCAGCTATTCCGCGTTATATCCCAAAATCGAATATCCGC

CATTTACATGATTATCCCAAAACAGGATAATCAGTAACTCGATAACGTTACGGAACGAAG

AACATGGACTTACAAGACTGGCATCCGGCGGACATCATCGCCGGGCTCAAAAAGAAAGGA

ACATCACTTGCCGCCGTTTCACGAAGTGCAGGCCTGTCTAGCTCCACGCTGGCAAACGCG

CTGCTCCGCCCGTGGCCGAAAGGCGAGAAGCTTATTGCCGATGCGATGGGCATCTCACCG

GAAATAATCTGGCCCAGCCGTTATTTTGATGAGGTCGGAAATCCCGTTCATCGCCACACG

CGTTCAAAAATCTGACCATCCTTACACCGTTACCCACAACCCCACAATCGCCATCGTCGT

TCTGGCGAACGACGACCGCTGCCACTCACCGGCCCCTTTGATGGTGGCCGGTTCGCTGGC

TTAGTCTCATGTGGATTTGTGGATAACGGACGGCCTGTGAATGTGGCGACTTGTTGAACA

ATAGCACCCCGTGCGTTAGCATCGGACAATATCACGGCCATAAATCAGGGATGGATTTGA

TGAGTGAAGAAAAGTTTAACCCGCAGGATATTGAAGAGATCCTCTCTCGCCCGCCGTCTT

CCGACAGCCACAAAGTCAAGAAAGGCGATATTCCCGAAATCGCCAAAAGCATCGGCATTG

GGGCCATAGAAATCGTCAAAGCGCTTCCGATTCTTGCGTTCGGCGCGCTGTCTATTTCCA

CTAAGCACACCCCGATAACAAAAGCAGGCTATCGGGATGGCTCGGAAGGATATGGCTATT

ATGATGAAACAGGTCTGAGGAATCGTACTTTTGACCCCAGCCAATCAGACGATAAATAAC

CAGAAGCACCCTGAATAATGAACAGGTACTTCTGGCCGACGGTTATTTCATCATCGATTT

TCCCTTTGTCATCGCAGCTCCGGCGACGTCTGACGCAACCTCGCCCCCTTTTTCTCCTGC

TGATTGCGCCTTACCTGCGCCTTTTTGCAGCGACCCCGCCACTTCACCACCGACCTTAAT

TCCCGCCCAACTCAGCGCACCAATCCAGAACGCCGGAAACACCAGATACATCGTTCCCAT

CACCAGGTTCATCACCCAGCCGTCCGTCGTTGAACCGGCAAAGTCAGCAAAAGGCACCGG

GTTCCCGCCGTCGACATTATCCAGCCCGCTGTAGACGATGTCGATCAGGCGGTCATCCAG

CCAGCCCGCAAACTCCCACCAGAACGTCAGGAACATCAGGGCAAACATGGCGAACGACAC

CGTCACCACAGCCTTGGGCGAATAGACGCTGAACATCAGCACCAGAGGAATGACAATCAC

CAGCGCCATCTCCAGCAGCGCCTGCACCATCGGCAGGGTATATTTGAGAATATCGAATCC

GGGCAGCGCCACCACCTGCCCGGCAGCGACGCCCAGGCTTCCCAGCGCGCTGGACACAAA

GCTGAATGTACCCGCCGAGGCGTTATTCCCCATCATATAGGTTTCGCCGTCGCCGGAGAG

CGAGGCATTTTTCGGGCTGACCACCCAGCGCAACGCGATCTCTTCCCACTCGTTGCCAAA

CTTCTTCTTTAGCGCGCGAGTCGTGATGTCATTGTAGCTGGACATCACCCGCGTCTTCAG

ACCGACGGTCGGAGTGTTCCACCACTGCTTACAGGTAGGGTAACCGCCCCGCCCTACGTC

GGGATAACCATCATCCCGATTCGCATCGTAGGGCCACTGCGAACGCGGTTTGGTGGAGGT

GTAATAGTCGTAATACCCTGACGTCGAAAGAAAGTAGTCAGAGCCAATCCAGCCGACGGA

ATTAATGGTCGCGTCCGAAAGCTGGGCGTTGGTCGACTTCAGCCGGAAATAGGCTTTGGC

ATAGCACTGATTAGCGAAGTCCTGCACCTCTTCCAGCAGGATCGGATCCTTTATCTGCGT

GTGCTGCACGTCGAAACGTAGCTGACGCAGGTTATCACCGCAGGGAATACCGGCGATCGT

CGCGTGCGTTACGCCTTTTGACAGGCTGTGGATCATGTACCACCACACCGGTACCATGGC

CGTTTTACCGTCAAAGTCATTAATCAGCGTGGCATAGCCCGACTTCTGGGGGAGCGGGAT

GTTCACGCCGCACTGGGCGCTGCGTTCCTTATTGAACTTGATGGTGTTGACATCCACATT

AACGACCGGCGTCACGCAAAACATCAGCACAACGAAGGCCACGTAAATAACGTGCTCGAT

GCGCACCAGCGCCAGCGTGCCCTTATTGCCCTCATCGTCCCCCTCTTCGCGAGTTCGTAA

CCAGGTCGCCACCACTTTACCCGCAATAGGCAACGCAAACAGGCCGGTTGAAAGCAGCGT

TTTCCAGATGGCGTTATTCAGGATCCAGCCCAGTAGGATGAGGAAGTACTCCAGATAGCT

GTCGGCACTCATCGTCAGCTCCCCGCGTAAATATTCAGTTCAACCATGAGCGTCATCCCC

GCCATCAACCACTCGATGCGGCGAACGGCGGCAAGGTTGCCGGTTTGCTGAAGCAACCAG

AGGCGCACCCGCTGAAACCACAGCCCGGCGATCAGCCCATACAACGCCAATCGCCAGACC

AGCAGCCAGGGGGCGGCGTCATCCAGCCAGACGCGAAACGCCGTCAGGCTTCCGGCATAG

CGAACGCCCAGCCAACTGATCCCTAACGCCAGAGCGAGCGAGCCGACGATGGCCAGTAAC

ACTTTCCCGCTCAGGCGAATGCTGCGCCAGAGTATCTTTCTTCCGGAAACCATCATGGCG

CCACCTCCGTCCCCAGCTGCTGTACGGCTTCATCGGCATCGGGATTTTTTTGGCGGGCGC

TGTTCTCAAGGCCGCGCTGGGTCTGTCGCGACAGCGCTGTAACAATGGTGTTGTTGCTGA

TCTGCTTGCGCAGCTCCATCTCGTTCTTCAGCGCCACAATTTCCCGGTCCAGAAACTCCA

GCCGGCGCTCGGCTTCCGTCAGCGCTTCCTGCTGCTCCGCAACGTGAGGTTCCGACTGCC

CGGCGGTCAGCATCCGGCGCATACCGAACGCGGTCGCCACCGTATCCGCCATCGCCAGCT

CGCTTGCCAGACGTTGCACCAGAGCGGTGTTGTCCGGGTCATCCTTTAGCGCCTGAACAA

CGCCGCGCGTCACCGTGAGGTCGCCGGTTTTCAGCTTCGCCAGATTAGCCGCATTGACCG

GCAATGAACCGTTCACCAGCTCGACCAGAACCTCGTAATTCTTCTGGGTTGTCTCATCGA

GCATCGGCGTGAAGCCGGTTCCCGGCGTCGTGGTGCCGGGTTCGTTCTCCAGCCCGCCGC

TGGCGCACTCATTGCCGGATTTACAGGTGCGAATAGAGCGATCGCCTAACACGCTGGCGA

CCACCTGAGCCGCTTCATCGCCGTTTTTATATTTGCGGCACAGCGCGCCGTTACAGGCGC

TTTCACTAATGGATGCGCTGCTGTCCGCCGCCTGCTTATTGAGGATGTTGTACCCGGCCC

TGGCAATATCGTGCGTTGGCCGGATCGCGGCCTGCCCTTTACCGCCACGCTTTTTGCCGC

CGACCCAGGAGACGCCCTCGGTTCCCGTTGATTTGCTCAGTTGCTGATCGGCCTTCACCG

CGTCGCTCGTCCCACTCAGGGCGTTCTGATACTCCTCCCCAACGGCGGCCTGCACCCACG

GCCCGGACAGGGTGTGATCCGCCAGCTTCTTCGACATGGCCTGACAGTTCAACTGCGCCT

TATCAAAGTAAGCGTTGGCCTGAAGCGTGCCGTTGGTTAACAGCTCGTACAGGCCGGGAT

TGGCGCGCTGGATAACCATCGCGGGCAGGCTGGCGACCGCGCCGGTCGCACTGCTGATCA

CGTCCCCCATCATGTCTTTAAAGCCGCTGGTCAGGCCGTTGAGCTGATTTTTTACCGTGG

TTTTGACGTCAAAATTTCCACACATCAGGTCGGCATTCCAGCCAACGCCCATGCCAATTT

TATTCAGCCGGTTGCCGCTGGGCGGGTTGGACACCACCGTCCCGCCGCCGATGGCGTAAT

AGAGATCGTCGTTAATACCGCCCTGCACCTGACGACTGGTGTCATTGCCTGAGCTGTTCA

TGGAAAACGCCGGTAAATCCACCGCGCTGGCTGAAGCGCTGCACAGCACCAGGCTGGCGA

GAAACATGCGTTGAAACATCGTCATTCTGATCATGGTCACTCCCTGAGGTTAATAGCCAC

CAATATCGGTGCTGAAAAGAAACGTCTGGCCGCGCTTTTTGCAGCAGGCAAAGGGCTGCC

ACAGCGCCCAAGCATAGTTGCCGTCTTCGGCATAGGAAAACGCGCGGTCGGGAAACGCGG

CGCAGGACATGGACACCTTCGGAGCGAGGCGCTGCCACTTATGGTTGCGGGTGCCGGTGT

TTTCCGTCACCGGATCGGGCGGCCAGTAGCCAGCGGAAGCGTTGGCCTTCAGCGTCCGAT

AAACGTGGATCTGCCCGGGGCGGGTAATGATGTCTGCCGCACGTTGAGCCGTCACGGCAG

CGGCCTTATAGTCGTCCGTCTGTGTGACAAAGCCGGAACGGGGATAGACGTTGCCCCACA

TGTTCCCGGCAGTGGTTGCGCCGATTTCCCGCCGCCCCGGGGTGAGCGCCTCCGGGTAAA

CACTTTCCGGCAAACCGGTGCGCCACATCAGCGCATCCAGATTGCTCAGGAAATACGGCT

GCCAAGCGGTGGCGGCTCCCTTGCAGGAATAGCCGGAGGTCTGCTGACCGATAAGGCTGG

CGGCGGGATGGCCGATCGCGTCCACGCTGCGGTAGCGCACATTGTCTTTACGCTGGCCGC

GCTTTTGCTGATTCTCACCGCCACCGTCAGCCAGCCCGCCTAATGCGCTGCGGCTCAGCA

TCGCGACCTCACGCCACGGGTTATCGCCCGGCTGGCGATAGGCCGACACCACCACCTGCG

GGATAAAGTGACGTACTTTTACCGACGTCTTGACGCTGCAACCAAACGGGGTACACAGCA

GCCAGTAACAAACACCCACTACCCGATAGTCAATGCAGTCCGGGCACGCGGCGCTGGCGA

CAAGTTGGGGCGTGGTCAGCGAGGCGGATGCGGGTACGGCGCTTCCCGCCATCAGCAGCG

CGGCCAGTGGATAAGCAAACCGATGCTTCATGGCCTGCTCCCTGCGCGCAGCGCCGCCGC

ACGCTGAATATCCGTGGTGCCGTACACCACATCGCGATCGTCAAACACCACGGCGGGCAC

CTTGCGAATGTCCAGTTGCCAGGCCTTCAGTACGCCCTGCCAGGCATCGACGATCCGCGC

CTGCTGACGTGCCCAGTTCGGCGACTGAGGCAACACCTTTGCCTGCCGCTCCGCTTTGTC

GGGCTCAAGCGCCAGATTGCCGAAAATCTGCTGCTGCGCCGTGTCCGGCGCATCCAGCCA

GACCACCGTGACCTGCGGATCGTTATCTAGCGGAGGGTGATGGCGGTCGGTGTACAAAAC

CACGTCGGCACAGGCCTGCCCGGCCAGCACCAGTGATGCAATTATGATGAGTAGTCGTTG

CATAACGCACTCCTGTGTGGGGAAAGCGACAGGGTGCGTTGGGGTGGGATAAAAGGCAGT

AAAGAACTGTTAATTGGGTTTTGAAGATTTTTCTCTCATGGGGTTAAAATATTAACTATA

TTAGCTTTGAAGATATTTTCTTACTGCCAAGTACTCTTTTACACGACCATCCCACAAAGA

TGAAGACTTTTGCATGGAATTAATCAAGTCGTCGAATAAGTAATCTCTATTTTCAACAAT

CACTTTTCTGTCAGAAATTCCTTCTGGAGATAATTGATGAAGATGCATCATAACATTAAA

TTTTTGAGAACTCGTTGCCGCATCATTATCAGAACAACTATCAATAATCGACGTTATTGA

TACATTTTTATTACAACAGACCTCAATCATAAACTCGAACTCATCGATTGTCATATAGTA

TATTCTGTTTTTGTTGATAGGTAATTCACCATATTTATTTTCAAACATACCAAAAAATGA

ACCATCCAGCACATCCTCTATCATCTTACCTGTAGGAATATAATGATCCATGTGTGTGAT

AATAATCAAAGAGTCCTTTATACATTTTTCTTTTTTATCTATTTCATTCATATTATAAGC

ACAATCCATACCTTGAATCACACCTTTAATGAAACTATTTGCCAACCTTTCCTTGATAGA

TTTAGCAGAATTGGAGTGCTTTATTATTTTATCAGGCTCTATCGCTTTGGAATCAATATA

AACAGTACCTACATCCTCTCTAACAATAAAATCGACAGTTTTTGACTGTACTTCATTTTG

TTTATAGATGCTGATAATTTCCTTTTCGGAAATAATTTTTGATGGTAATTCGTTTAATAT

CGAACCAATATATGACTCCATTACTTTCGCAAATCTATCTTTATAACTGGAACCATGTTT

ATCTTTTAATAAAGTTGGAACCAAAGAGGACAGAGATGCTCTCAGGAGATGTTTGCTTAA

TATGATTAATCCTTCATCTATCAAAATAAAAGGTTTCATCATCATTGGCGGGTCAAGGTA

GTATTCACTTTCTCGTTGTTTTATATCTTTGAACCCTGACATAAACCCTCTCAGTTCATT

CCATTTCACTGAAACTAAGTCTAGGTATTTCTTCACAATATCAGTACCAAACATTGGAAT

TAAATGTATTAAATACAACCTAACTGGAATGTATTCCGACTCTTTACCATTATCAATACA

TGACATCATTGCAAAATAAGCACTTATTTTATAATAAGATTCCAATGTTATTCCATGCGT

TTCCTGGAAAACCTTATCAAAATAGCCACCATCATAATTACAATACCAATAGTATTGTCT

TGCTAGTGTATTTAACTCTAGTTTCATAGGAGCTTGATACAGCTGTTGATTAATGATCAT

ACGCCTGAGACTAAGCAGTACCTTCTTATCATCAAAAAAACCAGAAACCTCATTCTGAAG

ATTATATATCCTATTAACAATATCGATGAAATCTCTTTTATTCATTGGAGATACATTTCG

TTTAAGCGGTTCCGATAATTTCCATTTTAATGCTAAGAAGCAACACCATGGGAAATTAGA

AGAAATCCCAAGTTCTGGTTTTAAAATGGTTTGAAAATGATCGTACATCATCGTTATAAA

AGAAGCGTCATCATAACCTGATAGCTTCTTTTTTATTGCCACAACCTTACCATTATAATC

TTTTCTTACTTTAACTCTGGGGAAGGCTTTAAGTGCCATGTATTATTACCTTATTAATAT

AATGATTGATTTTTTTGTGCGATCACTCAAAATTAAGGTTATTTCAACATCATTCAAAAC

CAAATTTTAAATTGACAAAAATCGCACTACACTGCACTTACCTATACACTTAAAATACCT

AATATAAATCAATTTAAATCAATGTATCGGCACTCGATTAAAGAGTACCGATATAATAAA

AATCACCTATGTTTATACAGAGAAGATTTTTGATTTTTCCTAATTTTTTTACCATTGAAC

TGTTGTTTATAGCGATCATGTATACGACGCAAACGCAATTTTATATGACCATCCGAAGAT

ACCTTTGCTCCAGTCATTGACATGATCGCTTTCACTGTCAAAAATTGTTCCTCTTCATCA

TCACATACGTATATTAATGAATCCAGATTTCCAGGTTTGATAAAATCCTCTATCAAAGCT

TTATATTTATCATAAAGAGTTGCATAATCCTCTTTTTCAGAAAGCCTCTCAACATATTTT

TTTAGCTTTGGTGTTTTTATATCATCAATATTTTGGGCGCAAACCTCACCATATGATTCC

GCTAATTCCTTGACTTTATTAATTAAACTGATTATATCTCTGGTAGGAATAATGGGTTTT

AGTCGACCAATAGTATCGGGAGTCCATTCATAGAAAGTGATAACTTCTTCCTCACCATCT

TTTTTGATAGTTCTTTGTATTTCAGTACCAACATCTACATTAATAATCCAGTTTTGATTT

CTCTGGGCATCATCTATAAATCGTAAAACAGAATTAGGGAATGATTTATAAAAACTATCA

AGAATCTTTCTTGCAGAAATAAGATTAGTCCTGAGACATGCAACTTCATTAGGGTAATCT

TTTTCACCAAAAATATATCCGCGAAGTTTTTCTACAGCTAATCTCCGTTCAATCTCACTT

TCAACTCTTTTTTTCTCTAACCTAAATGAATTATCTGCTTTAAAATATTCTGAAGCGCAA

TGCCCTCCTATAAGGGCTTCCACTCCATCATTAGTTATTCCAAGCCAGCCATTTTTGTGT

TTTTGATGGCAAATTCCTTTTTTTGTGCGAACCTGACAAATCACATTCTCATCAAAACGA

TACATTCCTACCAGTGATTTAAAATTATCTGGACTAATTTCTTGCTCAGAATTGAAAGAT

GCCCGCTTTTCTATCTCGTTATAGCTAGAAAAATATATAGCCTTTTCTGCCATATGCACT

CCTTAGCCAATTTATGTACAGTTCAAAAATAAACCACACACGGAGTAATGGCAAGCAGAT

TCGTCCACTTATTCACTAATAACTACCTGATATCTATAGTAACCAGTAAGTGTTTTCTTC

GCGATCGTTCGTCATGGAAAACTGCCCGCCCATAGGCGAGCAGTTACGATTCCAGTCAAC

ACGGCATTTCGTGGGGCGTTACCCCTCAACCTCTCCTTTGAGCCCGATGAAGGCCTGCTT

TATCTGCTGAAGTTGCTTACGCAGCTCATGTATTTCGTCGTTATCAGGGATAAGCACAAT

GCAGTCTCCGGCAATCTTCACAGTAACGCCGGTTCCGGTTTCAAAACCGGCGTCCTTAAG

CCATTTTCCGCTCAGGTGTAGAGAAGGTGTGCTGGCATCGCCCCGACCGGGAAGATAGCC

GACGGTGTAGCGCCGCTGGGTTTTAACAGGTTTTTCGGATGACAGGTCAGTTTGGATAGG

GGTCGTAGCCATAAGGCAACCTCCAGTGAGTAGCAAGTTATTCCCACCACTAGAGAGGTC

AATCTCATTGGCGGTGGAACCGGACGAGGTTGACCTTACCGGCCTCACTGACACCGGCGC

GTCTCGCGACGCCCCCGTCCGGCCCACCATTGAGATGTAGCAGAACGCACGGCACAAAAA

AGCGCAGACGCGCCTTGTGTCGTCAGTGAAGTGTTTCAGGAGGTCAATCCCGTCATCTGA

TTTTGCAGATGCATGGGAAAGATACTGCGATCGCTGACGGGCGGCAAGAGGTTTTATCTG

AAGGAAGATCGCAGAAATGAAATGTTTCAATGTCAATAAGTTACAGGAATGGTAAGAAGA

AAGCCAACATACAAGTAACTGGGATAATTACGGGTATATGCTAACAAAAACAAATTGATT

TATAACAAAGGCTTTCTCGTATCTATATCAAACTACAACGTCAATTTTTATCTATAAATT

GTTGTAACTTAGTAAAAAGCACAGTAAGTTCATTACGTGAACATTATCAATGTCCGGAAA

CCCTATGTTTAAAAACGGATTTTTCGGCCCAATGAACGCCAAAACTCAAGAAGGAATGGG

TATGTCAGACTTACCAAAGAATATCCAAGTTATATTTGATAACAACCCAATGCTCAAGGA

ACTAATCCCGAATCCAGTTTTGGCCTCAGGATCATCTTTTATCGTTGCTTTTAATGATAA

ACTAGCACTGAGCACAAAAAACTCTGAAAAAGACGATATTTATAAAGTTGTCTTTAAGAA

AGATTCATCTCGAGATTTAATGGCCATTAATAGTGGCGAATTAAAGGGATTGCTCACTAC

TACTTGTATAGAGAAAGGTAAAATTAGTGATGTGGCAGGTTTAGAAAAAATAGAAATAGA

TAATAAAAATGAACTTATGCCCACATTGTTAGGCATAAGTCTTTATAGTTCTATTCAAGC

CAGTCTATCCTATATATCTCAACTCTTTACTGATATAAGAAACCACCAAATTATCGAGGA

ACAAGCCAGATTTGAAAGAATTTCTGAAACAATAGTAGATAGTTTTAGAAGCATACCTGA

TATTTCATTAGATCGTTCGATGAGGGATGTTTATTTAACGCGAATCGTTAAAAACAATGA

CGATTGTTTTGAACTGTATGCTTCACAAAGAATACAATTCGCAAAGCTTTTGCAATCAGA

GCCAGAATACTATTCTACCGGTTACAACCATTATTACAATAGCAACAACGGCCAACGATT

TTATCCTGATCGTTTTTTTATAAATAACGTATTAACACATCCTGTATTCGCAGTCTTTGA

ACGATTAGTCGCTGGCAGAATTTGTGAAATTGTTATTAGCGGTAACTTTTCCGATAGCAA

TATTCAAAGACACAAAGATTTCATATATAGAATCCAAACCAAGCTAGAAGAACTTATGAA

ATACCGGTTATGTGCTTTCGAACGCTTCACTATGGAACAAAAAAACATCATCGATGAAGA

TTTAAATTTAACTGGCCATGACCGAAAAGAATTAGAAAAAAACCTAGCCGAACACATTAA

TTTCGTTAAAGAAATTAATGAGAAAATATTTTCACTATTAAAAAACAAGCTTGATGGATT

TAACGTACTAACACACCTTATGGATCAAGATGAGATAACTATATATATCCTTGATGGAAA

ATTATTAATAAATAACTTCAAGTCAACCCCAAATTAAAGAAGTAAGTAAAAATCTCTTAT

TGTTGTTAGTTTATCAATGGAGTGCTGTTATGGAAAAAATAGTAATAAAAAACTTAGATA

TAAAAAGATTCAATGCATTAGCTGCACAGTCAAGAAGCCCTGCAGCAGCATACATGAGTG

AGGAACTTGAATGGTACGCAGATTCCGACGAAATTGTATTGGGTATTGTTCTCAGAGACA

CAATAGATAGCGATTTTGTTGGAATTATTTTAGGGAGAGATGAGGGGGACAGGTTCCGCG

CTTTCGATGTTAAGGCATCAATACCAACCCAAGAAGAAGCAAGAGTTTGGGTACATGGTG

GTATCAAATGGTATGCTGGAAAAGGGGAGAGAACGTTCCCTCAGGGCGATGAAAGCAAAG

GTTTAGATTTATTTACTCCTGTAGTTCCAGTAGCAAAGCAACATCCATACTTTGCCAAAT

TAGCCCAAGAAGATTCTTTTATACCAGCCAAGGCAATAATAAATCAATTAATGCCCCATT

ATACTGATATTGATGGTAATTTTGTTGAGCAGTTTCAAAGCTCAGGTTTTGACGCCCGAC

TCTGGGAGTTATACCTAAATACATATCTCAATGAAGAGCAGCTTTTTTTAGATAGAGAAT

ATCATGCCCCGGATTTCTTAGTTCAAAAGTATGGAATCAAAGTAGCAATCGAAGCAGTAA

TTGTTGGTAGAAAAGAAAGTAATCCAATATCTTTTTTTCAAGATGAACCAAAGTTTTTAA

CTCCATCAGAGATAAAGGAAAAGCTCAAAGATGAAATGCCTATTAAATTTGGTAGCCCTC

TATTTAGCAAGCTCAGAAAAGAATACTGGAAGCTTGACCATGTAAAGGGAAATGCACTTA

TATTCGCAATTGCTGACTTCCATGATGATCAATCTATGCAATGGAGCTCAAATGCTTTGA

TAAGTTATCTTTATGGTGTAAAGCATGAATTTACCCGAGATAAAGATGGCCAGCTAATTA

TCTCACCTTTGAAAATTGAAAAACATCAAGTAGGAAATAAAACTATACCCTCTGGTTATT

TTTTCCAGGATGAAGCTGAGAACATCAGTGCGGTGTTATTCTCATCAAGTGGAACAATAT

CAAAATTTAATCGCATTGGTCGACAGGCTGGCTATGGCCCTGAAAATATTATCATGCATC

GCTTTGGTACTTGCCATGATCATGATCCTAACGCATTTCTCCCCAAGCAATTTGCTTATA

CAGTTACCACTAATTCTAACGAAACATGGGGTGAGGGATTATCTATGTTTCACAATCCTA

ACGCTAAGCATCCCGTACCTGAAGCGCTATTTCCATCAATTGCTCACCATTACTATGACA

ATGGTCAAATTGTCAGCCACTTACCTGAATTTCATCCTTATTCGTCAATGACAATAAATA

TGAAAATTGAGGCATGATTTTTTGATAAATAACCGTTACCGGACGCCCCCCCACAATCAC

CATAAAGCAGCAATGGGTTGCTTTATGGTGAAATCATATAGCACATGCCATATCGAATTC

TTATTCAATTCGTGTTGATATTGAGTTAAAAAGCACATAAAAATATTATTATTTAAGGTA

TTTAATTCCACTCTCCTATGGGCTATCATGGGTTGCAGGGCGTTCAATGTCAATATAACT

AACCTAATAGGTGTTTATGGCAACTACTTGGGAAGATTATCAAGAAGAAGCTGCATCATT

CTTCAGATCTCTTGGTCTTGAAGCAACAACTAATGTTAGAGTTAACGGCATTAGGACGCA

CCATGACATTGATGTTTTGGTTAAATCCCATCATGCAGGATTTGATATTATATGGCTTGT

AGAGTGTAAGCATTGGAAAAACCCAGTTTCGAAACTTCACGTTCTAGCTTTGCGTGAAAT

AGTCACTGAAATAGGTGCAGATCGAGGAATATTACTGTCTGAATCAGGTTTTCAAAGCGG

AGCTATTGAGGCTGCCAACCTAACAAATGTCCATATAACATCACTTGCAGAATTGAGTTT

ATCTGCCAGTAAAGATATATATTCCATGCGATTGCGCGAGCTCTATAACCAAGTTGAAAT

CTGTAATGAACGTTATTGGAATATACCTAAAGATGAGAGAATTAAGTATGGTCTTCGACC

TGAAGTTGGAGCAATTAACTATTCAGCCCCCCGTGTAGTCGAGCTATGCAGAGATTTATT

TTCTCGTTCATTTAGAGGTGTATATCCCTTTGAATGTGAAGATCCAGGGAAATTTCTCTT

CCCACACACCCCCCGAATTTTTAAATCTCCTGAGGAAGTTGTAAAGGCTATAAAACCCTT

AATTTCAGAACTTGAGGAAAAATTAAATGAATGTGAGCGCCAGATCAACATCATTAAATA

ACTACTCAGATAACAATCCGGCTAACTTTAGTCTTTTAATCGTTAGCAGTTTCATGCATT

CATGGTCAAAATTATTTTTCTCATATCTCATAGCAGAACATAATCGACTGGATGACGTTT

AACTCCGCCCCCAATATGAGCAATAATAATCTCCTCCATTTACATATAAATTGCGAGACA

TCTTCCAAATTCACCAACTCAATATTGTGCAACTCCCCCATCGCCTTATTTAATACCCCC

CCCACAAACAAACACACCTAACCAAAAAATGATCAAACAATCAGACAGCGAACTGGCCGC

CTTTATTATCGATATCGCATTAAGCGACAGCTGCGTAAAAGAAATACTCTTATCCCGTCT

GCGCTCGACGTTATTAGTCGAGACAGCCAGTGATGAAACCAGAGAATACCTCGAGCTGAT

GCTACAAAGAGTGTCAGTGTGCCATTAAATCCACCGTTACGTCGGCCCACACCAGAAGAC

AGCGTCTCACGACTCCCTCCCCTAGCGAAGGATCCCCCGCAATTCATCCATCTGCCGGGC

AACCCGCTTCGCGGCCCCCAACTCGCTAATACCGTATTCATTCATCAACGCCCTGCGCTG

CGCCTTCTCCTCTTTCTCCGTCATCCCCAGCGCCAGATACAGGCTGGGCGGCACGGCGCG

AAACAGCGCCTCAATCCGGCTGGCGAGCACCACACCCTCGGTATAGCAGTGCTTCGCTTT

ATTGGCCGACAGCAGCATGGCCTTCTGCTCCTCCGTCAGCTTTTTAAAGCGCGCTATCTG

CTCCACCTCTTCCGGCGGCATCACCAGGCACAGCCACCACTCGATCATGTTGAGCATCTT

TTTCGCCGCATTGGGGAAGTCATCAAGGTTCTGCGTCGCCAGCCAAAGCCATGCTCCCAG

CTTTCGCCACATCTTGACCACCTTCACCACGTAGGGAGCCAGCAACGGGTTGGTGGTGAT

CATATGGGCCTCATCGGTGGCGAACACGATTTCCCGATCGTCGAACTGATCGCGTTCCGC

CAGATTATTGATGGTGTTCACCAGCGAAATATAGGCTACCGCCAGCGGCGCTTCATAGCC

TTCACGCGCCAGCGTGCCGAGGTCAATCAGCGTCACGTCCGCTTCCGGCCAGTTCTCGCC

CGGGCGATTAAACAGCTCACCCAGAAAGCCCTGCATAAACACGCCGAGCGACTCCCCCAT

ATTCTGAGCGCGTACCTGCCGTTCGGCGGGGCGGGCGGGATCGCGGGCAAACTGATAAAA

CGCCGACTGAAGGTCGCCGGTGATCATCTGCCTGCCTTCGTCCCAGGCCTGTTGCGCCGC

CGCCAGAATGGCCTCACGCATCATGCCGCGATCGGCGCGTTCCAGCCTGGCCTCTTCCTT

CTCCTCCCCACCGGTGATCATCAGGCGGGCGGCGATCTCCAGCTCCCCCAGAATGTCGCG

CTCCTCGTCGCCGTCCTCTTCACCGTCAACGTCGTCAATATCAATGCCGTCGCTAAGCTC

GCTTTCACTGACGGGGACCACCGGCTGCTCAATCAGCTTGTGCGCATCAGCAAACGGGGC

CAGAGAAATCCCGCAGCCCGGCTTGATGCTGATTTTGTTCACCGTCAGCCCCAGCTCACC

GCAGTAATCGGCAAACAGGCCAAAGCTGTTCCCGGCTTCAGCGATGAACAACCGGGGCCG

GTGGATCGCCATTAACTGGGAAAACAGGCTGTTGAGCGTGGCCGACTTGCCGGAGCCCGT

CGGCCCGAAAATCGCCATATGGGCGTTCTTGGTACGGTCATTGCTGTTCAGCGGATCGAA

CGTGAGCGGCGCGCCGCCGCGATTAAAGAAGGTGAATCCCGGGTTGCCGGTGCCGGTATC

CCGCCCGAACAGCGGTGACAGGTTCGCCAGATGCTGGACAAAGGTCAGGCGGGTATACCA

ATGGTGCTTATCCCGGGCCGGGTTAAAGCACATCGGCATGGCGCGCAGGTACCCATTCAG

CGGCGCAACCTCGTATTCGCCCCGGGTGGGCTGTAAACCGGCGTTCAGCAATACTGCGTT

CAGCTCGCGCTGGCGCGACTGGAGCTGCGGCAGATCCGGAGCCGTTAGCAAAAACGTCAT

GCTGCCGTGATAGAGCTTGTGCCGCTCGCCCAGAAACGACTTGGCAATGGCCGCATCTTC

CCGCACCCGGGACGATTCCACGTTTTCGCCAATCGCGTTTTTTGCCAGATGGGTAAAACG

CTCTTCCAGCACGTCCTGTGCCTGCACCACAATGGTCATGCACATCACGGTGCCTTCCGG

CATGAGGTCCATCAGGGCATTGATGTTGTCACCCTTGCGGGTCTCCCCGGTCAGATGTCC

CACCGCAGGGGGGCGACGCAGGCGATCGATAGTTACCGCCCGGTGAGGCTGTTCGTCAAA

CCACCAGACGCCGTTTTCCGCATCCGAGCGCGGCGGCGTAAACCATAAGGATTCGCTGAA

GTCGGTCATCAGCGGCAGTGCGTTATGTGGGTTGTCGTGATGGCGGGCGGTGCGGTAGAG

CACCTCCTTTTCCACCCACTGCGGGTCGGGGTTAAACCAGCGCAGCAGCCAGGCGTGGAT

CTGCTCCCCACTCTGGCGTTCCGCCACCACGCCCGCGCCGTTCAGGGCGGAAACCAGCCG

CTCGCACACCTGACTCAGCGCCGTTTCGGGTGAATACGGATCGCGCTGGGCGGGGTCGAC

ATAGCGATAGACCACCATGCGGGTACGCCGCTGCTGACCACGCCACGGCGCGCCGGTGAC

GGTCTTATCAATAAACAGCCCTTGCGGTACGGCGATCCCGCGCATGTGGCCTTCAATCTC

CCGCAGGTAGTCCTCGGTGAAGGCGCTCCCCTGCGCCCAGGGCTTGATGTAACCGCGCAG

CCTGTCCAGATAGGCGGTGACGTCTGTTTCATCCTGACAGAAGAACTGGATCACCCACGG

GCAAGTATCCCGCTCGTCAAAGCTGTCCTGAATGGCGTCTTCAATGACGTCACGGATCTC

CTCCAGGCGCTCCGCCGTACGCCCTTCCGAACCGACCGGCAGCACGTCGAACACCGCGCC

CACCGACACGCCGTCATCCAGCAAAATGCTCTGGCTGGACGGCAGATATTCAACCCAGGG

CAAGTAGTCAATCAATGGCGGTTCACGATGGTAGCGCGCTTGCTCATCCGAGATTTTCAG

CTTGCCCGATTTCCTCAACGACGGTTTGAGTACCGCCTTCTCTTCAGCCTGCGGCACAGG

TGCCGCCGCCTTTTCACGCGTAAACAGGCTAAACATCACAGCGCTCCCACTCGTTCACCC

GGCAGGGCATACTGCACCTGGCTGTAGAAAGGAAATACCGTGCTGTAGCCCGGTACCGGC

ACGTTGCCTACCGTCATATGTGGGAAGACATACATCACCAGATCGGGATTGGGCAAGCGA

GGAAATTGCTGCTGGATCTCGCTGTTAGCATCCCGGCTGTAGCTTTCCGCCACTGCCGGC

TGCGCGTTCCGCTCGACGTCATTCAGGTCGCGGCGCAGTACGGCGCGCGCTTCTGCGGTC

ATCTGCGGCGAGCCGCTTTTTTGCTGCCACAGATCCAGCATGGTGGAATCCCCCGGGGGA

AGTAATTGCTCTTTTGACGTACTGCATCCGGCCAGCCATAGCGCGGCCAGCAGTAAATAT

ATTCTGGGCATCATTCACCTCGTTCCTTTAATCCAGATGCTGCTGCGGGCCGACGGCCGC

ATCGTATTTGACCCTGCGGCCCTGCTCTTCATAGTCAATCGGCAGTTGGCGGGTGATATG

TACCGCCACGCGCAGGCCGGGTGGCACATAGATAGCGTCAAACGTCTGGCCGTAGCGCTG

GCGTACCCAGTTGGTGGTTTCCTGCATCCCGCCGGACACCGCCTTACCCAGCGCATAGGT

TCCGGCATCTCCCGTTAACGTCCGGGTTACGTCAGTCCCCTCCGTGGAGGAGGTCATTTC

CCCTTCCGCCATTGCTTCCGCCGCTGCCGTCGCGCCGGACAGGGCAAACAGGGTCGGTAA

ATAGGTGGAGGCATTGGATTTACGCTCACCGGCCAGACACGGAACGCCATGCTCATCCGA

CAGCCAGCCGATGCTGCCGCCGCTGCGGTTTTTGTTATCGCTGCCGTCGGTCGATTTAGC

CGGGCTGGGAACGGTACGAACCGTACCGTCGCTGAAAACGAAGGTGATGCTTTGCACATC

GCCCCGCACGCAGGAGAGCGTCCAGTCGCCGGTTGCCGTTCCTGAGACAATCGCCCCTTC

CACGTCAGGCAACTGGATGCCGTTTGCCGTCAGGTTATCTTTGCCGATCAGCACTTTGAA

CGGGTAAGGGTCGGTGACTTTACCGTCAATCGGTACCCGCCCCAGCAAGGCCGTCATGGC

CTGGCTGCCTACCAGCGTTGAGTTTTCCGGCAGCGTATACACCGGCGTCGCCGCGTCCTC

AATGCCGCGCTCATTTTTCGCGTTACGCGCCAGTTCGGCCTTCTGGCGGGTGATCTCGTT

ATCCTCCAGACTGGAGAAACGGCTGGGGAACTGAAGCGCGCCGCCGGTTCCTGATGCGGA

AACGTCGGCCAGCGTCATTTTGCCGTCACGGCTCATCTGCATCGCATCCTGCGGCTCAAT

CCAGACCATGCCCTCGCCACTGGCCGGTGCAGGCGGCTCATCTCCGGCTCCCAGCCCAAG

GCCAACGGGTAAATCGCCGTTCGCCCCGGCAGACGAACCGCCTGCGCCGCCGTTCAGCAG

TCTTTCCTTCAGCTCATCGAGGGCTTTGCTCAACTGGCGCTGCTCTTCCTTTACCCCTTC

GGCCTTTTGTTCCGCCTCTTTTTGCGCCTTTGCCACCGCCGCACTGATGCGGTTATCCAG

ACCACTTTCCCCCTGCGCCAGTCTGGCGTTCTCTTCCGCCAGCGCTTTATTGTCTCGATC

CAGTTCGACCTGCTTATTCTGGATCGTCCGCATCCGGCCAACCAGCGTGCGCAACGTGTC

CTGAGGCGTATCCCCTTCCACACCCAACGCCTTCAGCTCTTCCTGCGTCAGATCCGCGAC

CACGCTATCCCCTGTCTGCGTCGCCGCAGGCTGTGAACGTGAACCGCAGGACTTCACCCC

AATGGCAATGGCGATAAACAGACAGGCGGGCACCGCCATCTTTAACAACGTGTTTGACTT

CACCTGCATCATCGACCTCCCTTTTTCGCCATCACCGCACTGGGCAAGAAGGCGTTTTCA

GGCCGCCCTGTGAAAACCAGATACAGCAGAGTGGTATCCTCCGGCGTCCCCTGCGCACCT

AACCAACGGTGTTGAAATGTGGCGCTGTAAAAACGCCCCTGTAAGCGGCGAGGGTCAAGC

ACCACTGGCTTATCGCTCTGGTTCTTCAGCCGGACGGCGACCACGCTGTATCCGCTCGCG

GCCCATGCGGCGAGCGTTTTGGTTTCGACAGGTTCCGAGGGCAGCAGAGAGGTGATGACG

GCAGGCTTAAGGGAGACAGGAGAAATACCGGGCACGGCCTCCACCGTGCGCAGCGGGGCA

TACAGATGCTGCGCCGCGTAGCGCGTCAGCTGTACCGGTAAAGGCGCGGAGAGCTTTACT

TCGCCTTGACCAGCCGCGCCGTTTTCCCTTTCACCGCTGGCGTCACGCCCTGACACGGCT

CCCTTATGGCTGGCGCTCGCCGTCGCGACTTCCCCGGAGTAAACCAGCCTGACCGGCTCC

AGCGCGGCTTTTCCGTCCTGGGCGCTGACGTCCAGCAGGATCAGCTCGCCGTTTTCCAGA

TCCTGCAACTGCAAGCGGGTCACGGGGAATGCCTCCTCCGCCTGAAGGTAGACCGCGCCG

CCGCTGCTCTGGATGCGCATCTTTCCGTTCAGGGTTGCGGGGAAGCCTACCCGCACGTTC

TTATCAACAAACACAATCCGCTCCTGCCCGACGTTCAGCGGGACAGGCAGTGGAATGCGC

TCCCATTTCATGAGCTCCACGGCCTGAACGGCGCAGGGAGCCAGCAGCGCGAGGCTTAAT

AACAGTCGCTTCATCAAAATATCCCCTTCTTCTCAGGCACATCGACCGGGGCGGCTTCCA

GGCGCTGCGGCATCGCGGCAAAGCAGTCCAGCGCCAGGCCAAACGGGTTCAGTTCCGGAT

TGACGTCCCAGCGCACCACCTTCAGCGGATAGCGAACTAACGCGCGTTTGACCGGTTCGT

TGTGGTAATACTCATCGGCGGTGAGGTCGAGCCGGATAACCCAATGGTCGCGATCGACAA

TCTCCACCCGATCGCCGCGGTAACCTCGTCCGGGGATTTCATAGATACCGCGCACCCGCT

CGCGCAGTTCGCCGGAGAAGTTGCGCTTGCGCGCGTCGTCCTCCAGTAACGTCTGGCATT

CCGGGGTCAGGTAAGGGGAAAGAGACTTAATTCTGGCCGGATAATCCTGTTCACCATCCT

TCGGCCAACTGTTCAACTGCTGAAATACGTAGAAGCCAAACGCGTATACCGTGCTGGGCG

GCACTTCCCACCAGGGGCGGGTGCTGCCGCTGCGCAGGTCCGGCGGCTGATGGATAGTGA

GGTTGCGCGGCGCGTTCATCCAGCCCAGGGCCAGCACCAGGCACACCAGAATCAGCAAAA

CGCAGGTTCCGCGCAGCGTCCAGATATGCGCATCGCGGGCGTTAAGGGCATTTTTGAAAC

GGCTCACAGGTTCACCTCCAGCTGTATCACCGCCCTGCTCCGCCGCAGCGACCAGCGGCG

CGACACCAGAATTAGCCGGGGATTGCCCAGCCCCCACTGGACGAGCGCCGCTTCAAGGCG

ACGATAAAGGTAGTTTTCCGGCTTGCCGCGCTTGATCCGCGCCAGCACTTTGCCGCCGAA

GACAATCACCAGTAGCGGCAAAATGAGGGCAATCGTTGGGATCATGACCCAGGAAAAAAA

CAGGAACGGCAGGGAGATAACGATGCCTGCCAGCGTGCTGAACAACGCGGTCAAACCTAA

TTCGGGGGTGGTGAACCCCCGGAAAACGACCGGTTCAGCGTTGAGCCTGTCAGGCATGAA

CTGAATCGTCGCCATCGTGCCCCCTTATCCGGCCACGATGGTGGCGGCTTCGTTGGCAAG

CCAGATCACGGCGACAATCAGTACCACACCCACGGCCACCATGGCACCAAACTTGCCCCA

AGTCGCCTTGCCATCCCGGACTTCGGCAAACGTGGACACGCAGCTCATCGCCACCACGAT

AAAGGCCACGGCGGCGACCACTAACCCGCCCAACACCAGACCGTCATTGATATAACCGGC

GATCTTTCCATAGAACGTGCCGTCGGTTTTCGACTTCGGGCCTTCGACCGTCGGCAAATC

GGCCAGCGCCGGGGAAGAGAGTCCTAAAACCAGTGCGGTACAGACCGTCTTCCTGGCGCG

TAAAAAAAGTGCGTTCATGTTATTCCTTCTCATTAACTTGCAAATAAAAACAGGCTGACC

ACCAACAGGACGACGACGCGAATGACAAACGACAGGACGGTCTTTTCCGACACGTTCCCT

GCTTCCCAGCCGCGATAGACGGTGACAAAGGCAAACGCGGCCCACAGAAACAGCACGGCG

ACCAGCGTGCCGATAAACAGCAGATTGAGGAGATTCGGGTCGGCGTTGTTGGTCGAGGCG

CGAAACGCCTGCTCCTGTTCGTGGGTCATTGCTCCCCCTCGCGTTGGTACTGGCCGCTGA

TATCCTGCGGCAGTACCGGCTGAGCGCGGGAAGGCTCAAGATAGGTTGAGATGCCGCGTT

TGATTTTCGCGATATCATCAGTGGCCTGCGGGTAGTCAAAATAAAAGCGGTGTGATGTGT

GTTCCTGTACTGCGACGACCTTCGCCCGCTCCAGACTGGCCTGAAGCTGGTCTAGCTGTT

TCATGACTAACGCCAGTTCATCCTTTTCACTGCCCTGCGCACAGGGAAGCACGGTGAATA

AGGCCCCCGACAGACAAAGCGCCCGGACTTTCGTCATGCGCATATAACCTCCTTTTGTTG

AATAAACGTGCGCAAAGGAGATTGGCGAAAAGCGTTACCGGAAGCTGTAAACAATCAAAA

CCCGGATTTCAAAAATTAATACGTCACTGAGCGACGCCTGCGGCATCGACGGGGCTCTTT

GCCGCCCCGGTCTGGCAAGCCAGTCTCCCCGCAGGCTGCGCGAAGGCGGCAGAAAGAGGC

GCAGACGTGCTATTCCGCCGTCTTCGCGCAGCTTGGTTTAATCATTTACGCAAAAACAAA

ATTAGATGGTCGTAAAAACGTCAGGGTAATAAGATAGATAGAGCTGCTGACATTAATCAG

GGATGAAAATAGTGGGGCTTAATCTTCAGGGATATCACGTTACAATCGATCACTCGCATC

GCCATTGGCTCATTACAACGCCTGAAGGAAACCCAACCCGTGAACGGGTGGGAAACCTCA

CTATTTATTCCATGTTCAGAAGGCAAAAAGCGCCCGCCAGCCTTAACCGTGACCGTAAAC

AACGCAAGCTGGGCGATAATTGTCCCTTGATTTATGCTTTGAAGGGAAAAGAGGGGCTGA

CAACGGACTTTTCCAGCATAAAGGCATTAAGCCAGAGCTTTAACGCCATACTGGAAGCCA

TTGCTCAGGCAGAGCCTGATGGTTACGACCTGATCGTTTCTATGCCATCCGCCCACAACA

TTAGCCACATTGTAGGGAAAAGATTCTCACGCTATTTCAACGCGCCGCATTTTAAAGATC

TGCTGCGGAAAATTACGGTTGAAGAGGCTTTTATTCTTCTCGATCGTGCGAATATTGATG

TAACTGACGTAAAGTCGCTTCAGTACCAGCTAAGAAGACAAAAAAATGAAGTGGGTTATC

AGGGCGCTTTTTCACTAAAAGGTATCCCAACGGAGCACAGGGCCGTTTTCCCGCCGATAA

CGATCAATACCGCTTTAACGATGCATCTCAACGCACACAGAATATTAATTACGGATGATC

TGCTGGCGACCGGAACAACGCTGGAAACCGCAGCTAGTCTTCTGGGGACGCTCTGCCCGG

GCGCATCGGTTCAGGCCGCCTGTCTGTTCAGTTCGATGGGTAGACTGACTCGCGGTACTC

TCAAGAAAAGGAAGTTCAGGGGCTGATTGGTTGAATATCACGCGGCATCCGCGTATACTT

TACAACAGATGTAAAGAGTGTGCTTGAGCCTCCCCGCTCTCTAAATCCCGATGAGGCCCG

CGTAGGCACCCTGGCGGTGGTCAGCTCGTAAAGAGTAAGTAACCCGCCGGTTAGGCAGCG

GCTAACCCCTCAACATCATATGATGTTGTTGTAACAGGTAAAGAGTACCGGCGAAGGGGA

GAATATCAATTCTCCCCTTTGTTTTTTGGTTAAAACCAAAGAGGCTCAGGCCGAGCCCTG

ATACATGACGATTCCTGCCTCACCCAGCCGGTCTGGCGAGATTCGAGATCTATTCTTAAG

ATTCAACATACTGGTTTCTTCAGTATTTAAAAGCACCAGTCGATAGTTCTGTTCGATGAA

AGCAATGATTTCCTCATCGGTAGCCCCCTCTTCAACAATATCAATTATCTTTTTTGCAAA

CGCGCGTTGCGGCATGACGTGTTCAATGCGTAATAAATGTGCATCGCCACGTTGGCGGGC

TTCGTATGCTCCGATACTGCATTCTGCGGTCGGCATTTTTTTTAAATTATTGACATGGGT

AAGCCCATATTTAACGCGGATACAAAGAACATCAATGATGCGTTCCACTGAATGAATAGC

GCCGCCGTTATCAGGGAAGCCAGCGGCATTAGCCTTGTTTCTTGCCTCAATAAAAAGCCT

CAATGCGGGCAGCAATGTCTCAGGGGTATACTTGCCAGACATAGGTTATTTCCTCTCAGT

GTTCGCGCCATGTGTAGGGTGCAGGTGTCTCATTTATAAATAAGTTATACCGACGTCATT

AAACTTAGCGTTAAATAATACAATCACAAATACTTCTTAAACGCCCCGGTCGTCAACGAA

ATCACCAACCCCAGCAGCAGCGCCGCAGGCAGCAGAAGAATATTGGGATATACCGCAAAC

GGCATCGACAGGTAGATAACGCAGGGTAAACAGGTCGCCGGTTTAATCCAGCGCTTGGCG

TGGTGATAGATAAAGCTGCTCTCATACGCCGCGCCGTAGCGGCGCAAATCGCGCCGAACC

AGGCCGTCCACGATGCCGATCGCTGCCACCATCACAAACAGCGGCACAGACAGCACCAAA

ATTGTGACCCGAATAAGAAAAACCAGCGTCACGTACACCGTCGCCAGCAGATACTCCCGC

AGCTTCACCAGCAGCCAGGCCGCGCCGCCGTTTAGCGTCCGGGTAAAGTCGTTGCCTTGA

TCTGCGTGGGGGGCATTCAACCAGCCCAGAAAACCGCTGTCCACAAACAGCCACTGATAC

GCCAGCGTCAGCCAACACTCTACCGTCACCACCGGGTCAGACAGCAGCAGGCTGCGGGTG

AATTCTTCAGAGAAATACCGGCTTTCCGTCTCCATGACCGCTTTGCTGTGCAGGGCTCCT

TCTTCAGGCCAGAAGAAGGCAATGCCGACATACTCAACGATCAGGCTGAAAATCAGCGAC

ACGAGTAACATGCCAACTAGCTGCCAGGGCCAGTGCCAGAACACGTTCGATAGCAGCCCC

GGCGGACGCCGGGGAACCTCCTGCTGGCGTGGGGCAGTGGTTGAAGCCCCGGGCTGCGCC

ATCAATGCACCTCCAGCACTTCAAGCTGGCACTGAAGCAATACCGTATGCGCGTCAACGG

TGATCCAAATCCCGACGCTATTAGATGAGCACATATCCTCTTCCCGGCAGGCGTCTATTC

CCGCGTCATTTAACGCTGCGATAATTTCGGCTGCTCTGGGCGTGGTGCAGACGTGGTGCA

TTAAAATCTGCTTTGCCGCGTCAGGTAACAGGGCCGGGTGCCCTAGCGCGGAGACCATCA

CGGCGCAAATCTGGTAACGTTTCATTCTTCCTCTCCTTCTGCCTCTTCAATCATGCGGTC

GCCCGGCATCGCGCCGCCTGACCACCACTCATCCCCGGTGCGGTAGTTTTTCTGCATATA

TCCGGCGATCTGGCTGATGCTCTCCGGCATAAAGGCATCATCGCCTGCTGCTGGAAGCGG

CATCCTTAATTTCCAGAGCCGCCCGCCTTCAAGCAGCGCAAACGCCTGCCCTTTTGGCAA

ATTAATAACGTTGGCGGGCGTTATCAGCGGCGTTCGCACGCTGCTGACCCTGTCCTGAAC

GTTACTGGTGAAGTCGCTGCCCTGATCGGGATTGGAAATGTCAGTCACGCCGGAAACCAG

CGTTTTGGTATACACCTCCACTTCCGGCAGTTGTCGGGTCAGTAGCTCAGCGGTTTCCGT

ATGGCGGACCCGCAGCATAACCAGACTATTGAAGTTACCCACCACCTGCGCCGCTTTGGC

GGAGTTACCGATTTTCGCCTCGATATCCGGCAGCGTTTGGGTGTAGGCCGTGATCTGGAT

CCCCGCGCCGCCCCCTTTATTAATCAGAGGAATGAACTCGTCCCCCATTAATTCACTGAA

TTCGTCACAGTGGAGGCTGATCGGTGTGTTGCCGCCGCTCTGCTGCGGCAGGCCGTCATT

AATGCCGAACTTATAGATATAGCCCGCCACCGACACCAAATCAGCAAACATGCTGTTACC

TACCGCCGCAGCCACTTCAGGATCGGAGAGCGCATCCAGGCCGACGTACACCACGCCCTT

TTTGCGGATAACCTGCTGCCAGTCAAAGATCGGGCGTGGGTCGTTCAGGTCACTGTAGTT

CGGAGAGATGAGCTGCGCCGTCTTCCCGGAGGTCAGCTTTTCCAGCAGCGGCAGCAGCGA

AGCCACAATTTTGTCGTAGTACTTCTGGTCATAGCGCACCGAGGAACGCAGCCCGTCCAG

AACCGGGTCATACACCCGCTTTCCGGCGTCGCTACCCAGCACATGTTCAATCGCCACCAC

ACGCAGGGAGCGCCCTTCCATATGACGGGGAACATCACGCTCCGTCAGCGTCGCCGTCAG

GTTTTCTATCGTCAACCACAGGTCGGGATGGTGCTGGCTCAGCCAGCTTTCGCAATAGTG

TTCAAACAGATCGCCGGGGTTGTTAACGTAGCGCTGGATCAGCGCGAAGTCCGGACGTTG

TCCCAGCGCGACCAGCGCCCGTGCGATGATATTGACAAAGCGCCAGGCAAATTCTTTAAA

CGCGGCGGAGTTCCCCGCATCGCTGAGCTGCCCGGCGACCCGACTCGCTACTTCCGAAAC

TCTGCCGAACCTTCCCACAGCATTGTAGCGCGCAGAGATATCCGGCCAGCCCAGATGAAA

GACGTGAAACTCATCGCCGCGCCCGGCGCGCTGGCACTCCGCGTACATCCTTTTCAGCAG

GTCGGCATCCCCTTTGGGGTCGAACACAATCACCACGTCTCCCCGGCGAATATCCTGAGT

AATCAGTAACTCAGCCAGGCGCGTCTTCCCTACCCGGGTGGTGCCCAACACCAGTAAATG

CCCGACCCGCTCGCGCAGGTCCATCAGCACATTGGTTTCATCCAGCTCAATGCCGTGCAG

CGCCGGTAAACCGCCCACAGGCGGCAGAGGCCTTACCGGATTAAACGCGCTCTCGCTTGC

CAGTAACCGGCACAGGGTCGGAAAACGATATTCCTGACGTTGTTCAACCCGCCGCGCCGC

CTGATAAACCCAGGAAGGGTTTACGTATCTGGCGACCTCCGGGCGTAACGTATCCAGCAG

GCGCTGCGTGTGCCGCTGCTCCCATAAAAAGCCTTTTCCCAGGAACAGCTTCATCTGGCT

CACTGGCACCTGACGGCTGGTCATCACGTAGCGGGGTAAGCGCCGGATATTACGGCGATA

GCGAAGTACCCGCAGCCCTTCGCGGGTGCGCTTAATCGCGAATATCCCCAGCGCTCCGGC

CATCACGTAGCTAACGCTGGGCGCTAAAGCAATCGCCCACGGCGCGGTAACGCAAACATA

GCTGGCGCAGGCGGATACCACGGCGGTATTCAGTTCAACCGCCGGTCGCAGCAGGGCTTC

AATCACATAGCGATCGCTCACCTGGTTGCCTCCCGGATTGGAAGGCGTGTCATTAGCTTC

ATTGTTCAATTCCCTTTTCGCTGATGAATACCGGGTAGTGTTGCAACCCCAGCCGCTTCG

CCAGATCGCTGCCGGATACCGGCAGCAGCTCGATATCACCGGCCAGCGTTTGCAGCTCGC

CAAACGCCGCTTCGTCCTCGATATTGACCACTAGCCCAACGGCCCGCAGCTGCCGCAGCG

ATTCCTTTCGTTCATCCAGCCAACGGCGGGACAGCGGATCGTTACCCAACAAAAATATCG

GCTGCATCCCTGGTAAACCGAGGCGGCGGGCCTCTACGCTGCCGGGCGTTAATTCAGGCG

TGGATATTGGCAATACCGATGCCAGTGACGCGGGTGCAGCGGGCAATACAGCCGCCTCCG

GCGGGTTTGGTGATTCAAATTCATTGGGCTGATTATTAATGCCGTCAAAATAAGGTGCGG

CAGGTTCCCCGCCCAAATCGGCAATAACGTTCAGCCCGGCGTGCGCATTGCCAAACAGGC

AACAGAGTCCCAAAAGGTAAATGCTCTTCATGGTGTTTTTCTCTTCGGCTCTACCCAGCT

CACCGCCGTGGGCTTTACCGGGTTCAGAGTATTCAGATGGCGTTGAACAACCGCTTTATA

GACGCGGGCCGGCTTGCCGCCCGCAGGATGATGGTAACAACCGGCGGCCTGCATCCAGCT

TCCCGGTTGGGCGTCGTAGCATTCGCGTAGGATCCGCGCCGCGACGCGCAGATTGGTGTA

GGGGTCAAAGGCGTGCCAATACGATGAAAACCGGCTGCCGTTCCAGCCCAGATTAACCTG

AGCGACACCCACATCGATTCGCTTCAGGGGATAGCGCCGGATAAACCCCAGCAACGCCTG

ATAGGCCTCATCACGGCTGGCATAACGATACCCGATTCCGGCAACGTTGATGGTCCACGG

CCACGGACGAACGCCATGGGCCAGCTTTTTGGCCGATTCGGTCAGCGCCAGCGAGTACAG

CGCTTCGGCAGGTACGTTTTCCTGTTCCGCAATCTGACGGTAGCCGGATGGAATCGACTG

TGCGCAGGCCAACGGGGGAAACAATAGCAGGAACATCAGAACGCGACGGGCAACCATCCG

TTTTCCCCCTGTTCCAGCACCACGGGCATTTGGCCTTTGCCTAACTTCAGCCAGCGACCA

GCGTCATGGTTGAGCGTAATCGCCCGCGTTTTTACGCGTTCAGCGGGAATATGCCGCCTG

CTCGCCCACTCACGTACCTTCGCGTCCTGGCCTTCGCTACCGACCAGATAAATATCAAAC

GGCTTCTGGCTGGCGAGCAGCTTCGTCAGCGTTTTATCACAGGGCGGGCAGTCCGCTTTG

ACAAACAGCGCCAGACGGCCATGACTCCGGGGCTGAGCTGGCGCGCTGCCCATACCTGCG

CCAATCGGCAGAATATGGGGGTAAAGCCGTTTCCACGCCGCGTCGACCTCCCGCTGAAAC

GCCAGCTCGGCCTCCACGCGCTTAAAGTCCTGCTGGACGGACAGTTCGGCAAAGCGGCGG

CGCTCTTCCGCCGTTCTGGCTTCAATGCCCAGCGCCGTAATCGGGTCCAGATCGGGAGAG

AATACGCCGCGCCGTCCATTCATTAACGCCTGATAGCGTTGCCACTCCTCGTCGGTCAGT

CCCCATGTCTGAGCGCTTTTACGGGTGTTCGCCTGCTCAAGCTTTCCGGCCACAGTATCT

ACCGACTGGCTATGCGCCCAGGCTTGAGCGTCGGTTTCCGCTGCGCTGGCAGGGAGAGAA

GAGGCGATTAACAGCAGAGGGAAAAGTATCGTTTCACGATCGCTCCTTAATGAACGCTGA

GCGTCAGCGTGCGCCCCGCCGTGCGAAAGGTGGCCTGACGGGAGTCGATGGTCAGCAACA

TCCAGCCGCTAAACGACTCGCCGGGGGTTAGTAAGCGAACCTGTTCCAGACTGCTGGCCT

GTCGGGGAGTAACGGAAACAAAGCGCGCCCCGCCTCGATACTCAACGCCATTCAAAACAA

ACGGTGCGGATGCGGATGAAATCACTTTGGCAGCCGTCTTCTTAACCGGCTTTTTCAGGG

GATTTGCTACCGCTGACGATGATGATGGAGCAAGCGCACTCTTACGCCCGGCGAGAAGAT

CGGCCATCTGTTGCTTCAGTTCCAGCCACTGGCCGGACAGCGCCCCGTCGCGCTGCTCCA

GCACCTCAACGCGCTGCGTTACCGACGTCATTTGCTGCTGTAATTGGGCGTGCTGCTGGT

TCACTTCCTGCCGATTTTCCGCGAGCGCTTGCGTTAACTGTTCCTGAGTCACCGCGCTAA

CCAACGGCTTCGGCGGTTCTGTCTGCTGTTGACGCGTTTCTACCCCAGCAATGCGTTGTT

CAAACTGGGCCTGTTGCTGCGCTAACGTCTGCCACTGCTGCTCCAACGCAGCGGAGGACT

GCATCAGGCGCAGCTGCTGCGTCCACAAAAAGGCAGACGACGCACCGAGTACGATCACCA

TCGCCAGACATCCCGCTTTGCGCAGAGGAAACGGCTTACCCGCCCTTTTGGGTTCTTTTT

CTTCCATTATGATGCGTTCCCTTTCAACGTTGGTTTGGTGAGGAAACGAGAGGGCGATGT

TTCAGCCTTTGGCAGCTGGTACCCGTCCCTCAGGCTATGGCAGACAATACGCTGTACGTC

GTCAGCTTCCAGTTGCCAGGCGCTACCCGCCATGACCTGTAGCGCCGTGTTCAGCCGCAT

AGGGCCGAGCTGGTAATGCACCGCCGGGAGAGACTGGTTATACAGAACGGCATTGGATGA

AGTGACGGCGCAGAGGCTGTAACCCGACTGTTTTAAGGCGTAGCGCATGGCATCAGCTAC

GGTCGGCGTCAGCGATGCGGGAATGCGGATATCAATGATTTGTTCCAGCGGCGCGCGCTG

GGCGGCGCTGGGATCGGTACTAACCAGCAGGTAGCGATCGTAGCGCACCACCTGCGGCGC

GTTTTCGCGCTGGTAAACATCATCAGCCGCAGACTGAACGTTGCTGTTTAGCGTACTGGA

AAGGGATAACGCTGGTTGTTGTAACTTTTGCTTTGGCGCGCAGCCGCCAATCACAATAAC

CCCTATCACGCAGAGCAAATACCGGTGATATTTCATAAAAGATCCTCTTATCGACGCGGA

AAAACGCCAATGTGCGAATCTTTCTTTACATGTTCAATTAACAACTGTTTTCCCGTGCTG

AAAAAAAGAAGCGCCGAAAAGGCGCTTAAAGGAGGGGTATTAAAACTGGTTATCACCAAA

CTGTTTCGGGGAAGGAACGTCCGGTGCAGAGGGCACGCTCGGTTCCGGTTTTTCTTCTTT

ATAAACCATCTCAGACCCAATCTTGATCCAGTTAACCTTAATTAACCGGGCTTTAAGACT

GGGGCGAACTTCACCGGCGTGTTCACCTTTTGTCAGCGTGAAAACATCGGCAGAAAGATT

GCTGAGCCGAAAGCCAAGCAACACCTTCTTTTCCTCTGCAATAGCCTTCTGGCAGCGCAG

AATGAGTTCAGAGGACTCCTTGCCGACGACCATAATATCAAAACGGGTGTAGCCCGGATT

ATCCGTTGCGCCAGTTAACGCATTAATTGAGCAGCACAGCATACTGCCGTTGCGGGTTTG

AACTTCTCTGACGTTGTTCAAATAACCCAGACCCGTTACGTGCAGATTGAAGTAATTAGT

TTCATTAGACATCGTGTTTCTCCTTGAATAAAAGCGGGACAGAGGGAGAAACAGCCCGAA

AAGGGAAGCTATTTCCCTCATGGGTGAATGGGTGTGAATACATACCTTATCGCCGAAGCG

ACGCCTGTTTAAAAAGGTTAAACAGGCCTGGGTTTGACCGCTATACCTTAAATAATTCGA

GTTGCAGGAAGGCAGCAAGGGAGGGGATCCCCAGGAGCTTACTCCAGTAAGTGACTGGGG

TGAGCGAGCGCAGCCAACGCACCTGAAACTTGAAGTATGACAGGTATTTAGCGCCGCCTT

GCAGGTCACGGCAACATCGGGTGTTGTCAGAGACAACGGATAGGCACGCTTATTTTTTCA

GCAAGAGGGAAAGGAATTGAAGGGGAAAATGTTTTACCGTCAAAAAAATTAAACGGGTAC

AGAGGACTCTGTACCCGCCATGATCTGCACTAAGGACCAAGGGTTTTAATATTCACTCCG

GGGCGAGTAGAAGAACCCGGCGCAGTTTTCACGGAGGTTTTGCGCCTTGAAGGCTATACC

TGCAACAGTACATACGCCTTCGACTATAACCGTAGAGACGGAGTGCTACACAGTACCCTT

AGAAAATAACAAACACTGCGGGAGGACGCCAGAGGAAACTATATTTCAACGGCATGACAT

TTTTACCCGCAGCGCGTCCAGAATTGTGCGTTTTTTGAGCTTTATGCGGGCCGCATAAAG

GTTGTTTTTTAACCATGCCTTTTCCCCTTTTTACCGCCGATCGCAACAGTTAAAGCGGGT

GAATTCAGGGCCGGAGAAAAGCCCGATCGAGCCTGACCGCTGACAACGGATGCCGACACT

TCGCCTAACGCAGCAATGGCTTGCTGCGCCGTATCGTTATTCGCCAGTACGTCGGCGCGC

GTGACGGCGACGGAGCGATAGCGCTGAGCCGCCCCGTAAATTCGCCTGATCGCATAACCG

GCGCTGGAGAGATATTGTTGCTTAGTCTGGGTGCTGATGAGCCCAAAAAAATGCGCCTGA

AACACCCGCAGGGCCAGCTGATCGAATCCAACCAGCAAATAGACGCAGCGATAGCCAATC

GGCGTGTGGCTGTGTACTGCCACGTTGAGCGGCGTTTCCGCGATACAGTCCGTTAGCTTG

ACGGAGCCGGGCATGTCAGCAAAAAGCGCATCGACTTCATCCAGCAATGTCTGCATTTGC

TGATGCGATGCGCCGATCAGCTTCTCCAGATGCAGCATCGTCGCATCCGCCCAAGGGTTA

TCCGTCAGGGAGTCCTGATTGATTCGGCCAGCAAGCTGGAAGAAGCGCGGCATCCCCATG

ATGGCCGACTTGCCCTCTGAAGAGCGACGGCCTTGCCATAGGGAGATAGCGTAGCGGGTA

TGAAGTTCTATACGCAGTTCGGAGCGCAGCGCGCCCGGCGTGGGGTGTTGAGGCTTTGAG

TTTTCCGACATCGTGATAACCCATTGGTTGGTTTAGGGTGTCAGGATGGTCAATGATGGG

TCGTTACGTGAACAATGAGAAAGTCTCATTTGATCAAAAAAGATTGAATGTATTGGCTCA

GATCTGAGCTGCCACTTTTGTGTCCCAGAGACTAAAAAACGCCTTTGTGCTTGTGGCATG

AGCGCATCTTCAGGTGAGGACGTTCCACTATTGAGCCTTCAGTAATCGCCTGTTCCTCCA

CATTTATTTGTAAATATGCTTGTGACATCATTGCTGACTTTCACTAAAAGTGCTAGTTTC

AACATATGATGAAAACATCATTTCTAGTGAAAAAAACCATTAGATCAGCTTGATCTTAGA

AATCAGCAATGTACTGATTTCATCAATATTGATGGTTTCAACGAATGCTGAAATTCGAGG

TTACAATGAAACTAGCTGAAGACCCCAGCTATCCCCTTATCTTGAGATTACAGTCACTGC

TGGAACAAATCCCAATTATTGAAAAGGTAAAAATAATAGGAGATGGTCCCAGCATGGATG

AGGGTGTTGACTACCTTATCCAGGTCCGGATAGATAAAACAACTTACGTGCTTGCCTGCG

AAACAAAAAACAATGGCCAGCCTAGATTTGTGCGCTCAGCGATTAAAACCCTTCGGTCTT

ATATGTATGGCAGAGAGGAGATTCTTACTCCTGTCCTCCTCGCTCCCTATTTGTCCGCCG

ATTCCCGACAGATTTGTCAGGAAAATAATATCGCATTTCTGGACATGGAGGGTAATGCAC

AACTCCAGTTTGGAGGAGTTTATATCGATCATCGTATGCCCGGTAAACCCGTGCCTGAAA

AACGTGGGCTTCGTACAATGTTTAGCCCGAAGTCAGCTCAAGTGTTGCGTATGATGCTTA

ATGACCCCCTGAGAACCTGGAAAGTCACCGAACTGTCGGAAGAAGGAAAGGTAAGTCTTG

GCCATGCCAGTAATGTGCGTAAAAATTTGTTGGAAAGGGAATGGGCTGTCATTAGCAGCG

AAGGACTTACCCTGAACAAGCCGGGGGCACTTGTGAATGAGTGGCGGGATAACTATCGCC

CAATTCAAGGAAAGAAGAAAAATTTTTATACACCTTTGCACGGCAACGCGCTGGAGTCTC

AATTACGCAACTTACTGGGTTGTGATGAAGTGCAAGGATCTGCAATTTTGGCCTCATTTT

CTGCCGCCCAGTGGCTGTCCCCTTATGGTCGTACCGGGATGCATTTTTTCTTTGCCGACG

AGAAAGGAATGGAGAGGCTGATATCAGGCCTTAAGTTAAGCACAACATCAAAGGGCGCCA

ATGTAACTATAACGGTCCCCAACGATGAAGGTATATTCCTTGATGCTATCGAGCCAGCAC

CGGGAATTGTCACTACAGGTGTTATACAGACCTACCTTGATCTCACAGTTCAGGGGGAAC

GGGGACAAGAAGCCGCTGAACACCTTCGAAATGAATGGATGGAATGGTAATTATGACAAC

AAGAGAACCTCAGTCAGCTGCTGACTATGAAGATCGGACAACGGCTGCCGTTAAATCCGT

TCTGATAGAGATAGGACAGATCCTGGGCAGTTACAAAGGAAAATTCACTGTTATTGGAGG

AGCGGTACCTTGGCTGCTTCTTAACAATGACGATATGCCGCATGTCGGCACGCTTGATAT

TGATTTGGATCTGGATTCAACAGCGCTGGGCGATGGTGAATACGCCACTTTGGTGGAAAG

TTTGCAGGGTTGCGGGTATGAACAGCGAGAGGGCGTCACCAGAGCATTTCAGCTAGTGCG

TACTATTCCTGCGTCTGACGATGGCCCTGCCATTGATATTATCATCGATTTTCTCCGCCC

CAGAGATGCTGAACTCGTTAAAAATGCCCCACCCTTAATAAGTAATTTCGCCGTGCAGCG

CGCAGACGGTGCCGATCTTGCGCTCAAATTCTATGAGATGGTGGCCATTAGTGGTGCCAT

GCCAGAGGGTGGCAAAAATACAGTGGAAATAGCAGTGTGCTCAATACCGGCGCTGCTGGC

CATGAAAGGATATGCCCTCAATGGTCGGCATAAACAAAAAGATTCTTATGATATTTATTA

CTGCGTTCGTAACTATGAGGATGGGCCGGAAGCGCTTGCTCAAGAGTGCCTCCCTATACT

TGCTGAAGAAAGTGGGGCCATCGGATACGGATACATTGCACAAAAATTCGACGAGGTGGA

AGGTTATGGTCCAACCAGCGTCAGAAAGTTTGTTGAAGAGACGAAACTACTTGGGGAAAG

AACTCCCGAACAGTGGCAACAAGATGCATTTGGTCAGGTAGATCTCTGGTTACGTGCTCT

TAACTTAAGATCTTAGGTACGGTATATAACCACCGGGCGGGCAGATATCAAATTGCTCGC

CCAGGATCCCTATGGCAGGCCAACAAATACATCAATATCCTTTGGGCACAATGAGCGTCA

CTATTTCAAAATCATCTTCACTTTTGTTAAGGTCGTTTTCCAACCCTCTGGGGTTAGCTA

TCCAACCATCGGGATCGTACACAAAACACAGCAGCTTTTTACAGTCAGGATGGGAACGAT

AACGCTGAGAATCAATCAACAACTCACTCCCGATATCTTTTGCTTTTAAGGTTGCGCGCG

TTTTCTTGACCTCGATAATGATCCCTTCATTTTTCAATAAAAAATCGGGTAATGACTCCA

ATTTACTGATAGTGTTTTATGTTCAGATAGTGCCCGATGACTTTGTCATGCAGCTCCACC

GATTTTGAG

>NODE_41_length_4034_cov_42.524540

TGCATCGGGCTACCTCATAAAGTCCATACAGTGCCGGTCGTGTCCGTCCGGCCTCGGGTA

GCTCTCTATTTTGTGAATATTTTCTCTGAGGGCAACAAGTCATTTTGTAGTGGCCCACCA

CACAACAGAACGATTTTTAGACAGTGGCAAACGTTGGTCATCTTTTGGTAAACGTTGGCA

AACTGGTGGCCCATTCCTGATTACTTTTATTTATATATTATTATTTTTTAATCGCAAAAA

AGACTAAAGGAGCAGGGCTCCGTCAAAACAGAAAGGTGAACAGTAGTGAACAGTCGGTGA

ATACTTCTGACCTCAACTGTTCACCACTTAACTTACTGTATTACTTATTCTTTTATTTAA

AGTGAACAGTAGTGAACAGTTATATGTAAAAAAACAAACGGTGAGTATGCTTTTCCTGAG

ACCTTTCTCTGGCAAGCCGGATTTTGACTTCCTGATTGTGCCAGAACTGCCACAACCGCA

ACAGGTCGTGTTGTTGTGTGTGCCCCGGCAGAATCACCTCATGTTGAAACCACGAGGAAA

CCTGCCATGACCGACACCACCTTTATCCCTGATTACCTGAAACCGGCGCTGGAGCGACTG

GCCGCAGCCAGAGCGGCCCATCTTGAACAGGCCCGCCTGATGGAGGACACCCTGACGGCC

ATCACCCGCGCAGAGGAGCAGAAAGCGGAGCTGGAGCAGGACAACGGCAGCGACACCCGC

ACCTGGCGTGCTGCTTTCCGTGCCGGGGGCGCCATGCTGACGGATGAGCTGAAAAGCGGC

CATATCGAACGCGTGGCCCGCCGGGAGCTGGCGCAGGAATGCCACAACCTGACCGAAGTG

CTGGCCTTTGAACGTGACCAGCTGAAAGCCACCTGCAACAGCACCGCGCGGGCATTCCGC

CAGGCGCATCATGCTGTGCTGAGTAAATACGCTGAGGAAGAGCTTAACCGCGCGCTGAAT

GACACCCTCGGGCCACTGGTCCGGGCGATGGTGCTGAAAGCGGAGGTGATGGCAAACCCG

CTCGCCAACACCACCGGCCATCAGGGGTACACCGAGCCGGAGAAAGAGGTCATGCATCAG

GTGGTGACCTTCCTGACCGGGAAAGTGAGCGCCTTCTCCGTCACGCCAGCCGATGAGCCG

GTGCTCTCCCTGACCGGCTTCCCGGCCGTCGCGCTTGCGCATATGGACCACGACGCCGCC

AGCACGCCCGGCGAGCGTAAGGTCTGGCAGGAGAAAATCCGTCAGCGCGAGGCTGACCTG

AAAGCGCGGGGGCTGCTGCCATGATGCACTGTCCGTTCTGCAAAAAGTCGGCGCATGCCC

GCACCTCCCGCTATCTGTCGGAGAACGTCAAACAGCGCTATCACCAGTGCACCAATATTG

AGTGCTCGGCGACGTTCCGCACCACTGAAGCCATCGACGAGGTTATCCGGCCCCCGGCGG

AGAAAGCGCCGCCTGTCGCGGAGCCGGTCACACCCCCGGCACCCCGTAACGTGCAGGGCT

GCTACAGCTCGCCATACCGTCATTAATCAGGGGAGAACTGACCATGACCACCCTCACGCT

ACAGCAGGCCTTTGAAGCCTGTCAGAAGAACGAAACCGCCTGGCTGAACCGTAAAGCCGA

ACTGGCGGCCGCAGAGCAGGAATATCAGGAACAGGTGCTGGCCGGGGATGACCGTATCCC

GGCAATTATGCAGGAACTGCGCGACATTATCGATGTCAAAAAATGGGAGATAAATCAGGC

CGCCGGGCGCTATATCCGCTCCCATGAAGCGGTGCAACGCATCAGTATCCGCAACCGGCT

GAATGACTTTATGCAGGCGCACGGGACAGAGCTGGCCGCCACGCTCGCCCCGGAGCTGAT

GGGACTCAGTCAGCAGCCCGCACTCCTGACCGGCCATGCGCTCGACCGTTCGGCGCATTA

CCTGCGCGAAGCGCTGTCAGTGTGGCTGAGTACCGGTGAAGAAATTAATTATGCGGCAGA

AGACAGCGATATTTTAACGGCCATCGGATTCAGGCCTGACGCGGCTTCGCGGGTGGATAA

TCAGGAAAAATACACCCCCGCACAGAGCCTGATTTATGCCCGCCGGCGCACGGAACTGGC

CAGTAAGTAGCTCCGCAAAAAATCCCCGAAAATACCGCTATTTTTCCCGAATTAAGCCAT

GCATCCACAGGGTGCATGGTCTTGCATGCGTTTCCTCGCCCTGTTATTCCTGTCCGGCCC

CTGTCCCGGCGCGGCCTGAGCCCCCCGATGCACCTGCATGAAAACCGACCCCTGAAGCGG

GCAGGCGAGGCGGGGAAAGCACTGCGCGCCAGCGGTAAAGTATTTATTTAATGATATTTA

ATTTCGCGGCCTGAGCGCGTCGCTGCGCTGCGCGGGTTCACGGGAGTGTCGGTGGGTGGT

GCGGCGCTGTTCGGGGGCATGTCGGGTTTCTGAGGTAGAGATCATTCTGCACTGACCGCT

CATCTCCTTGCTCATCTGGTTCTTGGTGGGGATGTTTAAACGTCTATGTGCTTTTAAGAG

CTCAGGCTACGAAGCAGGCTGATGTGCCGAACACTTTGTATCAAGATGATGATTAAAATA

AGGCAAGAAAAAATTGGTTAATTCTTTATGTATTAGATTTGAAGAATTTTTGCGCCCTTA

GCTCTCCTAGAGCGCACGTTATCATAAAGTGAATTTATTAATCCTCTTTGTCTTTGTCTT

TAATGGTGGAGTCTATTCGTCTTCTTTCCAGAGTTTTAGTGATATTCATTACTAGTATTC

CTTTATTTTGTCTTGATGATGTTTTGATGCCTATATCATTTGCTAGTTTTTTTAATTGTT

CAATGGATAGATCATTTAATGTTTCATTTGGCTCACTGTCTGACTTTGAACTTTTGTTAT

GTATGTGTCGAAGTGAATACATATCCTTGGAGGACTTGAGGTAGTCTTCTTTTTTTAGTA

TTTGTGAACTTTGTTTTTCTTTAACGATGGGGGTTGGTTTTTTTTTACGAGCATCAAGTA

AATTCAGTATGTCATCAAGTGCATATTCCACGCTTTTGTTTGGGTAATGCGCCATTATCT

TGGAGATATATTCAATCAAAGAAATTAACTCATGAGTTTTCATTATATATTCTCCAACTT

TTCATAAAGTTCGCTAACTACTTGAGTTAGATATTCACTCTGTTTTTCTGCATTAGGTTT

GGAACGAGGTAAAGAAGAGTGGCTAAATACTGTTAAATTGTTTTCGGACGCAACGGATAT

ACCGTCCCCGGCTGTGATGTAGTTATTGAACACCATGTTTGGATGCTGTTTTTTAACATC

ATTGATTGTGTCCTCATGAGTTTCTTTGGGCTTTTTATTATATTCGTCTACCATATTAAA

TATAATCCCAAGCATTTCGGTGTCATTAAATTCAATAGATGAGTTAGAATATTGAATCAT

CCCTCTAAAGTTTTTATTGAGCTTATCCATTTCAGATTTTATTAGGGAAATACCAACCGT

GGAAAGAAAGTCTGGAATTGCAGGGATAAGGTACAGTTCACTTGCAAAGAAAGCATTTTG

TGTGACAAGATTAATATTTGGTGGGCAATCTAGAATAATGTAATCATAATCTTCTGCAAC

CTGATCTATGGCTTTTTTTATTATTGCCATCTTATCGAGTTCCAATTCTGTTTCCTTTTG

ATGAGTTGATGCACTTTTCTTTTCTCTTGCCAACATCATATCAACAAGAACTAGTTCGTG

ATGAGAAGGTAGCAAATCAACGTTGATCCAGACCTGACCAGGGCTTGCAGTTATCGGTTG

TTTTATTATAGCGTCGCGAGTATGGAATTGCTTTCCATCGAAATAATCATCAAAAATATT

TTTTAGTGTGGGCTTTTTTTTGGTGTAAACATGTCTGACATATTTTTCCACCCCCAATGC

TAAATATGATAGATTTGATTGAGGATCTAAATCAATGAGTAATACTTTTGGATGCTCGTC

GGAACCGAGCATCAGCCCAACCCCAAGATGTAAAGATAATGTGGATTTTCCTACACCACC

TTTCCAGTTAATCATGCTTATCACTTTTGCCATGTGGAATCCTTAATTGAGTAAATATAG

TCATTATACCATTGTATCATCGAGCTTCTTTTCTCTAG

>NODE_53_length_655_cov_36.531300

AAGCCGTGAGAACGGTTGCGCTTCAGTACAGACGGTTGAAAAGTGCGTTTCATGGCGATT

TCTACCTAAACTTGAATAAATTCACTGACTTTTGCGTAGACCCGAACGAACTTCGAACGG

CTTACGCCTCAGCGTGGGTGATTAAAGAGGCCGGATTGTAATAATTGTACACTCCGGAGT

CAATTCTCTTTCCTTATTTCTCGCACCTCGTCGCACAAAAAATAAGCTGAGACGCGTGAC

GAAAACGGGCATTACGCGCCGGGTGGGGGATTATACGGCCTGGCCAGTAAAGCGCAAGGA

TCCACAAGGATCTTTATTAGATCGTTTCCGCCCAAAAGCGGCATAGCTCATTAATTTTTC

CAATATGCGGCGGAAATCGTGCTTCACTCCCCGCAGGATCGATTACACTTACCCGGTTTC

GATCCTTCCTGTGGATAAATCGGGAAGAATCTGTTGAGAAACACAAGATCTCTTTCTCAG

TTTAGGCTATGATCCCCGGTCCCGATCGCGATCCCCGGATCCGCAGCGGGTAATAACCGC

AGATAGCGGTTCGCACGTCACCCCTTTTGTGCAGGGGCTTTTCGGCTAATGCAGGGTCTT

GTCGACGTGTGCCAACAATCACGATTGTTTCAGTTTTTCTTTGATATCGATTTTATGTTC

GAGTGGAGTCCGCCGTGTCACTTTCGCTTTGGCAGCAGTGTCTTGCCCGATTGCAGGATG

AGTTACCAGCCACAGAATT

>NODE_54_length_10543_cov_30.482975

GGAAAAAAATCGGCCCAGATCCGCGAAATTTTAATCAGCGAGTCAGCTTGGGAAGAAATG

ACCTGCTTATTCGCACCTTCCTTAGCAGTGGCATAAATCAGCATCGCCTGATGTTTCTGG

TTCTATGCGAATTCACAGTGTGCTCATTGATTCGTAATTCACTCTGACAAGGAAATGGCA

ATGAAAAAGGTTCTTCTCTCTGCAGCAATGGCAACCGCGTTTTTTGGCATGACTGCTGCC

CATGCAGCTGATACCACTGTTGGCGGCGGCCAGGTTAATTTCTTCGGTAAAGTTACCGAT

GTATCCTGTACTGTTTCCGTTAACGGCCAGGGCAGCGATGCGAACGTTTACCTGTCTCCG

GTAACCCTGACTGAAGTTAAAGCGGCAGCAGCGGATACTTACCTGAAACCGAAATCTTTC

ACCATTGACGTCTCTAACTGCCAGGCTGCTGATGGCACTAAACAGGATGACGTAAGCAAA

CTGGGCGTGAACTGGACCGGCGGTAACCTGCTGGCTGGCGCAACCAGCAAACAACAGGGC

TACCTGGCGAACACCGAAGCTTCCGGTGCTCAGAACATCCAGCTGGTGCTGTCTACTGAC

AACGCTACCGCGCTGACCAACAAAATCATCCCGGGTGACAGCACTCAGCCGAAAGCGAAA

GGCGACGCTTCCGCTGTAGCTGATGGCGCGCGTTTCACCTACTACGTAGGCTACGCCACC

AGCGCGCCGACCACGGTAACCACCGGTGTGGTTAACAGCTACGCGACTTACGAAATTACT

TACCAGTAATTCCGTCAGAAAATAAAACTGCCCCGCGATGGGGCAGTTAATAACAATAAT

AAAGCGGCAATGTCCGCCGCTTGTATTTTTATTCTGAGGTCAGCATGAAGCGTATTGCCC

TTTTTTTCTGTTTCATTTTTAGTTTTGCGGCCCATGCCAACAATATTATTGTTAACGGTA

CCCGCTTTATTTATCCAGGAAATGAAAAAGAAATAACGGTACAGCTTTCAAATAACGCCG

ACCGTCCGGCGCTGGCGCAGGCCTGGCTGGATAACGGCGATGCCGATGCCACACCGGATA

CCATTACCACCCCGTTTATTATCACCCCGCCGATTTCGCGCGTTGACGCCAAGAGCGGCC

AGACGCTGCGTATTAAGCTCGGCAGCAGCGCCGGTCTGGCGAAAGATAAAGAGACGCTGT

GGTGGCTGAATCTGCTGGAAATTCCGCCGGTGGTGGCCAATCAGAAAAATGAAGGCCAGA

ACGTGCTGCAGCTGGCGATCCGTTCGCGCTTTAAATTTATTTATCGTCCTGCCGGACTGG

GCAACCGCGATGCGGCGGCCGAGAAGCTGACCCTGACCGCCAGCGGCAGTAGTCTCGCCA

TCAACAACCCGACGCCGTTCTACATTACCGTCAGCCGTATTTCCCGCGACGGCGGTAAAG

CCCTGAACAGCAAAACCGTGATGCTGGCGCCGCAGTCCAGCCAGACGGTGGCGCTCTCCT

CCGCCGTCAACCGCGGCGAAACCCTGACCGTTAACAACATTAATGACTATGGCGCCGATG

TCGCAGTGAAAGTGGCCGTTAAATAAGGGAAAAGCTAATGAAGCAGAGGTCATTCTGCCC

GGGAAGATTAAGCACCGCGATCGCCATCGCGCTGTGCTGCTTTCCGCCATTTTCCAGCGG

ACAGGAAAACCCGGGAACGGTATATCAGTTTAACGACGGCTTTATTGTCGGCAGTCGCGA

AAAGGTCGATCTGTCGCGCTTTTCGACCAGCGCGATTACCGAAGGCACTTACTCCCTTGA

CGTCTACACCAACGACGAGTGGAAAGGGCGCTACGATTTACGCATCGCGCGCGATAAAGA

TGGTCGGCTGGGCGTCTGCTACACCAAAGCGATGCTGGCCCAATATGGCATCGCGGCGGA

AAAGCTCAATCCGCAGCTGAGCGAGCAGGAGGGCTACTGCGGTAGCCTCAAATCCTGGCG

CAACGAAGAAAACGTCAAAGACAACCTGGTCCAGTCCTCCCTGCGGTTGAACATTTCGGT

ACCGCAGATCTATGAAGATCAACGCCTGAAAAACTATGTCAGCCCGGAGTTCTGGGACAA

AGGTATTACCGCGCTCAATCTTGGCTGGATGGCGAACGCCTGGAACAGCCATACCTCTTC

GGTAGGCGGGTCGGATAACAGCAGCGCCTATCTGGGCGTCAACGCCGGACTGTCGTGGGA

CGGCTGGCTGCTGAAGCACATCGGCAACCTGAACTGGCAGCAGCAGCAGGGTAAAGCGCA

CTGGAACAGCAACCAGACCTATCTCCAGCGCCCTATCCCACAGCTCAACTCCATCGTCAG

CGGCGGGCAGATTTTCACCAATGGTGAATTTTTCGACACCATCGGTCTGCGCGGGGTTAA

TCTTTCCACCGATGACAATATGTTCCCGGACGGCATGCGCTCGTATGCTCCGGAAATTCG

CGGCGTGGCGCAGAGCAACGCCCTCGTCACCGTGCGCCAGGGCAGCAATATTATCTATCA

GACCACCGTTCCGCCCGGACCGTTTACCCTGCAGGATGTCTATCCTTCCGGCTATGGCAG

CGATCTTGAGGTCTCGGTGAAAGAAGCGGATGGCTCGGTAGAAGTGTTTAGCGTGCCTTA

CGCCTCCGTCGCCCAGCTGCTGCGCCCGGGCATGACCCGCTACGCGCTCTCCGCCGGTAA

AGTGGACGACAGCGCGCTGCGCAACAAGCCGATGCTCTATCAGGCGACCTGGCAGCACGG

GATCAACAACCTGTTGACCGGCTACACCGGGGTCACCGGTTTTGACGACTATCAGGCCTT

CCTGGTGGGGACCGGGATGAACACCGGCATCGGCGCGCTCTCTTTTGACGTCACCCATTC

GCGGTTGAAGAGCGATGCCCATGATGACTCGGGTCAGAGCTATCGCGCGACCTTTAACCG

CATGTTTACCGATACCCAGACCAGCATCGTGTTGGCGGCGTATCGCTACTCGACGAAAGG

TTATTACAACCTCAACGACGCGCTGTACGCCGTCGATCAGGAAAAAAATAGTCGCAGCAA

CTACACCCTGTGGCGGCAAAAAAACGGCATGACCTTCACGGTGAACCAGAACCTGCCGGA

CGGCTGGGGCGGGTTTTATCTCAGCGGCCGTATCTCCGATTACTGGAACCGCTCCGGGAC

CGAGAAGCAGTATCAGGTCAGCTACAACAATTCATTTGGTCGTCTCTCCTGGTCGGCGAG

CGCGCAGCGCGTCTATACGCCAGACAGCTCCGGTCATCGTCGCGACGATCGTATTTCACT

CAACTTCAGCTACCCGCTGTGGTTTGGCGATAACCGCACCGCCAACCTGACGTCGAACAC

CTCGTTCAATAACTCGCGCTTTGCCAGCTCGCAGATTGGTATCAACGGTTCGCTGGACAG

TGAAAACAACCTTAACTACGGCGTGTCGACCACCACCGCCACCGGCGGTCAGCATGATGT

GGCGCTCAACGGCAGCTACCGTACGCCATGGACCACCCTCAACGGCAGCTACAGCCAGGG

CGAAGGCTATCGTCAGAGCGGCATTGGCGCCAGCGGGACGATGATCGCCCACAGCGGCGG

CGTGGTGCTCTCACCGGAAAGCGGCTCGACGATGGCCCTGATTGAAGCCAAAGACGCGGC

CGGGGCGATGCTTCCGGGATCGCCGGGCACCCGTGTGGACAGCAATGGTTACGCCATCCT

GCCGTATCTGCGCCCGTACCGGATTAACGCCGTGGAAATCGACCCGAAAGGCAGCCATGA

CGACGTGGCCTTCGATCGCACCGTGGCGCAGGTTGTGCCGTGGGAAGGCAGCGTGGTTAA

GGTCGCGTTCGGCACTAAGGTGCAGAACAACCTCACCCTGCAGGCGCGCCAGGCGAACCA

CGAGCCGTTGCCGTTTGCGGCAAGTATTTTCTCCCCCGACGGCAAGGAGATCGGCGTTGT

CGGCCAGGGCAGCATGATGTTTATCAGCGATGCGAACGCCAAACGCGCGATTGTGAAGTG

GAGCGGCGGGCAGTGTTCGGTGGATCTGGGACAGCAAACAACAAAGGATAGCGTATGTCG

CTGAGGAAATTACTAACGCTTTTTATCGTCTTAATGGCGCTGGGAACCACCTCGTCCTGG

GCCTCCTGTACGCGTCTCTCATCGCCAACGGTGATGCTGGACATGGTGGTGGGCAGGGTG

GTGGTGCCCCCGGATCTGCCGGTGGGCTCGGTGATCCTTACCCGCGACTGGACGATGAGC

GCTCCCGGCGGGGCAAGCTATCGCTGTACTTCCGGCACCAACCGCTTTGCGGCGAAGATC

GTGTCGCCAGGGGCCACGGACCTTGGAAATAAAATCTACTCCACCAACGTGCCGGGAATC

GGCATGCGTTTCAGCCGCGGCGGCGCAACGGTAAATATCGTCTATCCCGACGTCTTTTCG

TCCCGGGTATATAACACCACCAACTATTCCCTCGAAGGGTCGCGCTTTACGCTGCAGATT

ATCAAAACCGCGGCAACCACCGGCAGCGGCACCCTGGCGGCGGGTAAGTACACCTCCTAC

GACTGGGAGAGCGGCGGTAACCCGATCCTCGAAACCTATCTGAGCGCCAACGCCATCACC

GTGGTCTCGCCCTCCTGTTCGGTGCTGAGCGGGAAAAATATGAATGTCGATGTGGGTTCC

ATCCGGCGCACCGACCTGAAAGGGGTCGGCACCACCGCCGGCGGGAAGGATTTTAATATC

GACCTGCAGTGCAGCGGCGGCCTGAGTGAAACGGGATATGCCAACATTAGCACCTCGTTC

TCCGGTACCCTGGCCACCAGCACTACCGCTACCATGGGCGCCTTGCTGAATGAAAAAGCC

GGCAGCGGGATGGCGAAAGGCATTGGCATCCAGGTGCTGAAGGATGGCTCCCCGCTGCAG

TTTAATAAGAAATACACCGTCGGCCGCTTGAATAATCAGGAGACCCGCTACATCACCATA

CCGCTGCACGCGCGTTTTTATCAGTATGGCCCGACGACCAGCACCGGCGAGGTGGAGTCG

CATATGATCTTTAACCTGACGTACGATTAATACGGGAGGGGGAATGAAGGGATTGCCGAA

AAACACTATCGCGTGGCTGCTATTTTGCGGCAGCCTCGCCGCCCCCTCGGCGTGGGGTTT

TGAGACCAATTACGATCGCGGACGGGTCGATTTTGCCGGGCGGGTGACGGATATTTCCTG

TAGCGTCGCGCTAAACGGCGGCCAGCATGCCGGCAGCGGTAATGTCTGGCTGGCGCCGGT

CAGCCTGGCGGAAGTCCACGATCGCGGGGCCGGGGCGTTTATGAAACCGCAGCCGTTTAC

CCTGGCACTGTCAAACTGCCAGCTGCGCCATGATGGTGGGGCAGCCTCGCAGGATGAGGT

GCGTCGGGTCAGCGTGCGCTGGGTCGATGGTTTTTTACTGACGGCGGTCGGTAACGAAAA

CGCCGGGTATCTGGCCAATACCTTGCCGGATGGAGCGCAGAATATTTATCTGGCCCTATC

GACTAACGATAATAATACTCTGGATAAGAGTAATAAAATTGTCCCGGCGGACCCGCAGCA

AAATCAGGTGCGTTTGCAGGAAAGCGCGGTCAGCGGCGGCCTGTTCACCTATTACGTTGG

CTATGTTTCGCCAACGCCGAAAAGCGCCACCAGCGGGCCGATTACCAGCTGGGCAACGTG

GGAATTAGTTTATAATTAAGTGACGTTAAAAAGCCGGGAATTCCCGGCTTTTTTTACATG

GCAATATCATCGGCGACCAGTTGTTCAATACTGACTTCCCGCCAGTAATGTCCCTGGATA

GCAAACCACTCCATTCCCTGCAGCCATTCTTTATGGGCTTCGCTTTCGACACCTTCAATA

ATCACATTATGATGGTTGCGCGATAAAAAGGTCACCAGCGCATCCATCAGCTGGCGGCCG

GACTCTTTGCGCATCAGGTGCCAGAAAAAATCCTTATCAATTTTCACATAGTCAAAGTGA

TAACCGCGAATAGCGTTAATTCCCGCGTAGCCGGAGCCGAAGTCGTCGAGCCACAGTGAG

GTATCCTGTGGGCTCTGCCAGGCGGCAAGAGAATTATGCAGCAGATTCTCGGCGTTTTCG

GTTACCTCGAAATGGACGCAGGTCAGGGCGGCGACTTTGGCTTTTATATCCTTCTGGCGC

AACAGGTTCAGGATATGGTCATCAACGTTAATTGTTGCGGAAATATGGTTACGTAAAAAC

CAGGCTTTATGCTTTTCAATCAGTGCCAGTTGTTCGAGGAAAATACGTTCACGAACGGCG

GCGGTAGCATGGCGGAAAAAATCTTCGGGGGAAATAGAAAGATTATCAAAGCGGCTTAAG

CATTCCACCGCGACCAGAGTACCTTGTGGGGAAAACATTTTCTGAAAGACGTAGCGTACA

GCGATATCATTACGAGATAAAATGTTGTCTTCGAATATTTTAGTGTTCATTATCCCTCTT

CACGAGGTTAGTCAGACAATAGGCAGAGGATACATTAATTATAGGCTACCTGATGATTAA

TGGGAATGGCGGGAAATGTAAATCAACAGCGAATAAGTACGCTTTATCCGCTACTGATTT

ACCGGGAGAACATTTAGCATTGATGGAGAGCGGCAATACGCTGATTCATAGTGCGGGAGT

TATCAATACCCAGTTTTTGCATGATATGGATGCGGTGGCTATGAACCGTTTTATGAGCAA

TGCCGAGCAGGGCGGCAATACGCTTATTATTATTGTTGGCAATGAGCAGTTCGAGGATCT

GACACTCCCGTGGTGAAAGCTGTTTGCGCAATCCTCGCGGCGGCAGTTCGCTGACGCCTT

TGGCGCGCTGGACGATAGATGAAAAAAGAGTTAGCGGAGATTTCTCACTAATAATCATAG

CGTTGTCAAAGTTTATCAACTCTCTGCACAGCCCGACAATGTCGCTTTTCACCATTAGCA

CCGGCTGCTGGCAGCGCAGCAGGGAAAGGCGGAGCGCATTCAGCAGATCGACGATTCTGA

TGGCAGAAATATCCTTATTAATTAAATTGAAAATAATCGTCTGGGCCAGTGGCAGATGTT

TCTCATGGATGACATCGGCATAACTCAGTCGGGTGGCATTTTCATGGCTATCAATAAGGT

AGTGATAGATTGAGTGACCAATGAGATTGTCATTGGTGTACAGCAATATACTGTCCAAGG

TTGTCAGATTCTCTTTTTGCGCTTGGCTTCTAAGATCAGGTCCAGCAGTATCTTCTCTAT

TCTGCGCTGGTCATCGAGATGGCGGAACTTAAACTGGCAGGATATCTGATAGTAGCTCTC

ACTCTCTTCATTAGCGTTATCCAGGGTGATAACAATGACATTTTTGACCACCAGGTCGAT

GGTGATCTCGCCATATTCTGCAAGCATCAGTACGGCGTTTTTCAGTAAGGCGTTGTGGCT

GAGGAATTTAAGATTCGGCGTTTTGGTCATCAATGCGCAACCGCCATCTGAAATGTCTTT

GATATCGAAAAGATAGTTTTCGCCGTTTTTATGGCGGCCGCGGCAATAAAAGTCATGCTC

ATGGCGTAAACGAAAGCGGGGATCGCGGCGACGCTGCACTACCTGCAGGCATTCAGGCAA

TGAAAAAGCGTAGCGGATACCTTTATCGACACCGCTATTGTCATGTTTTGTCAGGGCCGC

ATTAAACTCTATTTTCCCTGAATCGCTATGCAGGAGAAAGCGAATTTTATGCCCGGACGG

GATTTTGCGATGGGTCTGAATATGAAACTCGGCAAAGTCCACGCGCGTCAGTTGGGTTAT

GATACTGGTGTTGTTAAAAAATATTTCAATTTCAGTACGTTTGCGCAACTCCTCTCTGAA

AATAGCAATAATTTCATACTTACTGGTCTTTATCGTTCCCTCTGTCATATGCATCCCTTG

TAAATAGTTGTCGTGAGGCGTTTGATTTTTCTTATAGCAATAGCAACATTCTGATTGGGT

TAATCAGATGTTTTTATGAGCGTTTGATGTTATTGACTATCTTTGCAGCCAGATTGATAT

GTATAAACTTGGAATTTGATATTGTATTTCCTGTAATCAAGAGTTTCGAATTTTGGTCAT

GACAAAAACGACAACGGCCTCCAAGCTGGAGACCGGTCGAAGGATAAAAACTTAAGTTTA

ATTAACGGGGATAATGAGAGAACGATCGTCGATCACGCCCCATTTGTAGGATCTATAGTG

CCAGTAGCGGTGAGGTTTTTCCAGGCAAATATTGAGGAGGGATAGGGTTCCCTCCATTTT

GTCTGGCAGGTCAGCGGCGCGCGGCGGTGGCGATATTATCGAGGGTGCGCAGCGCTTCCG

CGGGCAGGACCAGCTCGGCAGCGGCAATATTTTCCGCGAGGTGCGTGCGGGAGGAGGTGC

CGGGGATCAGCAGAATATTTGGCGCTCGCTGGAGCAGCCAGGCGAGGGCGACCTGCATCG

GCGTCGCCTCAAGCGAAGCCGCGACCTCGTTCAACTCCTGCGCCTGCAACGGCGTAAAAC

CGCCCAGCGGGAAAAAGGGCACCCAGGCGATGTGCTGGGCGGCCAGCGCATCCACCAGCG

CGTCGTCGGCGCGATGGGCAACGTTATAAAGATTTTGCACGCAGACGATGGGCGTCATTT

TCTGCGCATCCGCGACCTGCTTTGCCGTCACGTTGCTGAGGCCGATATGGCGGATTAATC

CTCGCTCTTTCAGTTCCAGCAGGGTGGCGAGTGGCGCCTCCAGCGAACCCTCCACCGGGC

CGTGCGGGCTCAGCATACTGCGCAGATTAACCACTTCCAGTACCTCAAGCCCCAGGTGAC

GCAAATTGTCTTCAACGGCCTGGGTCAGTTCGGCGGGCGACATGGCCGGTAGCCAGTTGC

CTTTCTCGTCACGGCGGGCGCTGACCTTGGTGACAATGCACAGATCGTCAGGGTAGGGGT

GGAGCGCTTTGCGGATCAACTGATTGGTGACATGTGGACCGTAGAAATCAGAGGTATCGA

TATGGTTTATCCCGGCCTCGACGGCGGCCTGTAGTACGCGCACCGCTTCTTCAGGATCTT

TGGGCGGGCCGAAGACACCGGGGCCGGCCAGCTGCATCGCGCCGTAACCTAAGCGATAGA

CCTGGCGATCGCCGAGCGTGCCGCGACCGGATAAGGTGACACTGGACATAAGAACTCTCC

TCACGGTGGCTAAGCCGTAAGTGTAATCCGCTCACAAGGAAGGCAAGGGGGAGAATATTG

TCAGAATGTGCGACAGCAGCTCAGGCAGCCGCTGTCGCCAGAGGGGATTAGCCGAAGAAC

ATCACCGACACGCAGAGCAGGCCAACCACCAGCGTAATGGCGTTACCCACCGAGCGGTAC

GGCTTCAGCGCCGGAATGAGCCATGTCGACAGCGTGGGCATAATAAACAGGATCATGGCG

ATAAGCGGTCCGCTGATAGCGTAGATCATTGAGATCGCATTCGGGTTGATAAAGCACACC

GCAAAAGTGAAGGCGGAGACCAGCAGGATCGACATCGCGCGGTTGAAAGCGCGGCTCTTA

CGCACGCCCAGCAGGCCCAGCGAGCTTTTGACGATTTCGCTGGCGCCCTCAATCACTCCG

AAGTAGGTTCCGAGAAACGACTTCGACATAGCGACGACGGCGACGATGATGCCGGTCACC

GCCAGCCATCCCGGCGCGCCTGGCACCATCGACAGGGCGGAGAGGATAGTCACCCCCTGA

TCGCGGGCGGTCTCTATATAGGTTGCCGGGATCGCCAGCAGACAACTGAAGACAAAAAAC

AGCACGCTGGCGCAGATGATGGTGTAGGCCACCTTCATGATTTTTTTGCATTTACCCATG

GCCAGGTCGCCGTGTTTCTCCTGCTGATCGATAGCAAAAGTCGAGATGATCGGCGTATGG

CTAAAAGCGAAAACCATCACGGGAATAGAGATCCAGACCTGGTGGAGCGTCTGCGGGCTG

AACTGCATCTGGCTGGTGAGATGCTCCGGATGCCAGTCGCGGATTAAATAGAGGGAGAGA

AACAGGAAACAGGCGATAAGCGGGAAGACCAGAAAGCCCATCACCTTGATGGTGACCTGC

CGTCCCATGAGAAAGATCAGGTTGAGGACCAGCACGACCCCCAGACTCAGCAGCGCACGC

AGCCCTGGGGTCATCGGCGTGCGATGCGCCACCTGTTCGGCCAGCGAGTTGGTGATGGCC

ACGGCGTAGATGAGCACCACCACAAAGAAGGCAAGGAAATAGAGGCCGGTGATCAGGTTG

CCAATTTTCTTACCATAGTAGTGATTAACTGCGCCGGTGATCCCGGTTCCCGGCGCGATA

TTGGCCGAGAGAATAAACTGGCTCAGCGCTTTGTGGGGCCAGTAAGTGAGCGGCCAGGCG

ACCAGCGCGGTGATGAACAGCACAATCGCGCCAGCCGAACCCAGCTGGATCGGTAGAAAT

AGCGTCCCAGCGCCTACTGCAGTGCCATATAAGGCAAAACTCCATAGAGTTTCTTCTTTA

GACCAAATTTTAGACATTATGCGACTTTATCAACCGTCAAACCAAAAAAAAGGAGTGCAA

TTTACCATATTTATGGTTCGTCTGTTGCGATAGTTTTCGGTGATAAAGTCGCGGCGGATC

GTCGAAG

>NODE_55_length_40696_cov_142.467926

TTTGTTTATTTTTCTAAATACATTCAAATATGTATCCGCTCATGAGACAATAACCCTGAT

AAATGCTTCAATAATATTGAAAAAGGAAGAGTATGAGTATTCAACATTTCCGTGTCGCCC

TTATTCCCTTTTTTGCGGCATTTTGCCTTCCTGTTTTTGCTCACCCAGAAACGCTGGTGA

AAGTAAAAGATGCTGAAGATCAGTTGGGTGCACGAGTGGGTTACATCGAACTGGATCTCA

ACAGCGGTAAGATCCTTGAGAGTTTTCGCCCCGAAGAACGTTTTCCAATGATGAGCACTT

TTAAAGTTCTGCTATGTGGTGCGGTATTATCCCGTGTTGACGCCGGGCAAGAGCAACTCG

GTCGCCGCATACACTATTCTCAGAATGACTTGGTTGAGTACTCACCAGTCACAGAAAAGC

ATCTTACGGATGGCATGACAGTAAGAGAATTATGCAGTGCTGCCATAACCATGAGTGATA

ACACTGCGGCCAACTTACTTCTGACAACGATCGGAGGACCGAAGGAGCTAACCGCTTTTT

TGCACAACATGGGGGATCATGTAACTCGCCTTGATCGTTGGGAACCGGAGCTGAATGAAG

CCATACCAAACGACGAGCGTGACACCACGATGCCTGCAGCAATGGCAACAACGTTGCGCA

AACTATTAACTGGCGAACTACTTACTCTAGCTTCCCGGCAACAATTAATAGACTGGATGG

AGGCGGATAAAGTTGCAGGACCACTTCTGCGCTCGGCCCTTCCGGCTGGCTGGTTTATTG

CTGATAAATCTGGAGCCGGTGAGCGTGGGTCTCGCGGTATCATTGCAGCACTGGGGCCAG

ATGGTAAGCCCTCCCGTATCGTAGTTATCTACACGACGGGGAGTCAGGCAACTATGGATG

AACGAAATAGACAGATCGCTGAGATAGGTGCCTCACTGATTAAGCATTGGTAACTGTCAG

ACCAAGTTTACTCATATATACTTTAGATTGATTTAAAACTTCATTTTTAATTTAAAAGGA

TCTAGGTGAAGATCCTTTTTGATAATCTCATGACCAAAATCCCTTAACGTGAGTTTTCGT

TCCACTGAGCGTCAGACCCCTTAACGGGTGTTTAAGAAACGCCGGGAGCGGGGAAACTGG

CTTTTCCCCGTTCCCGGGGTTGGACAACGACGCGATGCGGAGGCGTCAGGATTTTGTGGT

ATGACGAAACCAGTAGCAGACGGGTCCGTCGCCGGTATCGTGGACAGATCCCAGAAACCA

GCCATCATCATCCGGTGGCTCCGGTATCCAGCCACGGGCATCCGGGGCTTCATCCGTAAA

TCCGGCAGCGAAAGCTTCAGGCGCTTCATCGCGCATTGTCATCACAAAGCACTGGAGTTT

ATGGGTTCTGAGCCAGTAACTTAATTCTGCGGAAGTTTCACAGCCACTTCGTACCAGCGC

AGGATGTGTCCAGTACCCCTGTTCATCACGTTTCACTTCAGCGGCGATAATCATTTTTCT

TTCTCCTTGTGTTCGCTATGCTTTGTCGTTGATTTCATAACGGTTATGGATTTTTCTTCA

GCACCGGCTTCCCGGTATTTCAGAAACTCTACGACCTTTCTTACCAGACTCTCCGAATCC

CGATCGCGTAGTAGTGGAATGCCGGCCTGCCTCAGAACCTCTTCCAGCAGAATATCGCGC

CGGATACGGTGTTTTTTCTGGTGTGAGGCATCATCCAGTTCAACTGCGCCGATGATAGCG

AAGGTATGGATGTCAACGATGACCACATCGCAGTGCCACTGTGATGCCATCCGGAAGAGT

TGCCACCAGGTCCGGGATCGTGGCCGGATATGGGGAGAGAGTGTGGCAATATCTGCCACC

CGGACCTGAGGACACAACAGCCAGCGTGTTCGGCTGGTATGCCTCAGCAATGCCCGGAAA

AAATGTTGTTCCCGTGGCGTCATCAGTGTGTCATTACCCACCCAGACCCGCTGGCGACAC

AACCGTTGCTCAGCCTCTGAGGGGCGAATACCCAGGGCTTTCAGTGACCTCAGAACCGGG

GAAGTCTTCGTTACTGCGCGTCCTTTCAGAAGCAGCACCAGAAATCCCAGCAAACTCAGC

ACAACAACGGTACTGCCCGCCATCATTAATATCTTTGCCATGTATTTTATTCCCTGATGT

TCCTTTCTTTCCCGATGCGTTTTCCTGTCGTCTTCCTCATCTTTCTGTCCCTCTTCTGAT

AAGGCAGAACTCTGCCGGCAGCCTGTCGAGCAACGCGCGGCGAAATACATTCGGCAGTCC

TCTCCCGGCTACAACATCAGCAATCAGAACTGATATGACGCTAATCTGCAGGAAGTGGCA

CAGGACAAAACCAATCTGATGCACCAGTTCCGCAGCAGGCATATTACGAAGAGCATTAAT

CAGCCGGATGGCATCCTGTGGGGAACCCCAGGCGAGAATACCGATACCGACCAGCATCAC

CGCCGGCGTATACAACAGCCCCCGGCTGATAACCCGTCCGGTCAGGCCTGTAAGCTCACA

CCTTTGCTGGCGAAACACCTCATCATCCCGGAGGATTTCCCATTCCAGCCGGGCCTTTTC

ATAGCGCGGCACCTCGGCCACCACCTGAATACCGTCGCGAATACTGACCAGCGGTGAGAC

CTCTGGCTTTCTCATCCGGTCGATGTGCCGGGTGTACAGGGCCAGACCGGCCCAGAACAG

CGCGACAGATAACGCAACCAGATAAAATCCGCTTGCCCGGGATACAGGAGAAAATAAAAC

CATCTGAACCAGTGCCAGCGCGCAGCCGTATAAATAACAGAATAACTGCTGCTCAGGGCG

CAGAATGAAATATCTGAACATATTGATTCCTTTTTAGATAAAAATAACATTCACAGCCGT

CTTAATTTCATTATCGCCAGACCACTGTTTTCTCATACACCGCAATCACACCACGCCTGA

TTAATTCCTCTTTAACGCGACCATAAAGCGCCATGCCTTTTGTATTACCGGACAGGGATT

TAATATAATTCATCAGGGATGAAGTATTCGCCGGGCGGTTCCCTGCAGATTTTTTACTTA

ATGACTGGACTTTATCGGTCAGGTGCAGCACTTCATCGTTACTGATTACCATAGGTGCCG

CCTTCGGTTTCTCTGCAGAGCAAGGCGATGATATACGGCAACATCGTCTCCCCGCCCTGC

ATAGCTCGGCAATGACGCCATCATAGCCTTTATCATTCGAGATAATATGAAATATCGTCT

CTTCCGGTGCAGTCGCGCTAAGTCTTCCCAGCTCAAACACCAGATGGAAGTCCACATTAT

TTTTTGACACATTCGAAACCTGGAATACGCTTACCGATATATCACCTGCATACGTTACAG

CTGGAAAACGTATAAACTCCTGCTGAGGCCCGGTAAATAAAATAAGGCGTTCATAACGGG

ACAGACGGACATTTTCAAGTGTACCAATATTTTCATAATCTACGAGAGCAATAATTTTTT

CAGTCATCGTCATCCAGAATCTGTCTGCACGGACAGTTATGATGCCGCAGCCTGTAATGC

GGCAAATATAAAATGAATACCTGTTGCTATTTCAGGCATACCCTCAGCTAATTTTCGTTA

CATCTATTAGCTGAGGATTCCCAGGTATAATTATCAGGAATGGGTAAATATAATTAAAGG

GTCTGACTCATCTTTCGTTCAGCTCGCAGCAGCTCCTTCATCATGCGCTCACTGGCGTAC

TGCGCTTCCTCTGCAGTGACGGTCGCAACGGCATTCCCCTGCAGATCATAGCGGGAGGCC

CCCACCTTCATCCGGGACAGATAGTCCGCAGACCGGGTCAGACTCTTCAGGCACTTAATG

ACCTGTTTATGCGACAGCGGCAGGTCGCGGTTCACAATGTCGGCAAACAGCTGCTCGCGC

ATTCCCCTCGCCAGCAGACGGGGTGAGTTTCCGTCGAACAGCTGTGGCCAGAATGCCTTC

AGGGTCATGATGGCCTGTTCCGGCGGCAGCAGGCGAAGATAACGCACCGGAGGTGGCGTC

TTTACCGCTTTATCCGGCGCCGGCGCAGCGTTGCGCGCGTCGGCTTCGGCCGCTTGTTTA

GCCTTCTCAAGTTTCGCTTTCTTTGCCTTCCAGGCCGGCGGGGACGAGACCACCACGACC

TTCTTTCGGCGCACCACACCAGGAGCAGGGGTTGCCTCTGCGGGGGCCGTGCTGTTCTCC

GCCGGTTTTCGTTTCAGGCTCAGTACAGGGCGTTTTTCTTCTGCCATAACAATTGCCTAT

CGTTCAGTTAATAAGAGCTACTATACCTGAACGGTATCACCCTTTCCTGCTCCTGCGTTC

ACATTGAGACGACAATACCCAGTACCGCCAGGTGCACGGCATAGAACATCACGAAGAACT

GCCGCGGCCAGAAGCGTTTCACACGTTCTCCGGCAGATGAGCACACCATCAGCGTCAGCA

GCGCAATCGCCAGTCCGGCCACTGATTCACTCACGTCATGCATATTCATCAGCAACACCA

TGAGGGCCCACAACACCCCGTATCCCAGCCGTTCCGGTGCATGCTGTGCGCGACAAAGCA

GCCAGCTGGCGGTGAGCATGCCCACTCCGGCCATGCCGTAGCTGCCGGTTGACAGGGGTA

TCCAGGTGACCAGCAGTCCAGCCGCCGGGAGGGTGTAATACCAGGACGGCTGGCTGACCC

ACCGCAGGACCTGGCCCGTAACGGCAAAGGCAAACAGAATATTCCCGGTATACCACGGGT

ACCCGATGAGCATAAACGACACCTGGGCGACCAGCGCCCAGCCCCACAGGCTGTTCAGTT

GAGACTGGCGTATTTCCGCGTGCCGTGCCAGATTCATTCCCCATGCCAGACCGAACAGCG

GAAAACAACCACGTCCCAGCAGGCGCATCACTTCATTGTTTCCGGCCAGCAGTAAGCCGG

TGTGGTCAGTCACCATCAGTACCAGTGCGACCGTTTTAATCATATCCGTTTGTCCCGGTG

TCCAGGTCAGCAGGCGCTGAAGCCAGCTGTCTGTCGCGCCTGGAAATGTGTGTTGTGCTC

TCATGTTTTTTTTCCTTTTAGCGCTCCGGCAGACTGCCCGATTTCAATCGGGGAGGCTGC

CGGAGCAGACAAGCCGCAGGCGCGTCAGTCGCCCCCGAGTGTTTTCTCGCGGTTAAGGTC

ACGAACCATGTCCCGCTCCACAGCCTGCAGACGCTCACGCTGCAGACGTTCTGAGGCCAC

CTGCTGAATCGCCTCCTCCTGGCGCCGGAACTGAGGATCATCCGGTAGCGTCGTTTTCTC

CGTACCCGGCCGGTCACGCTCCAGTCCGCGAATGACGTCCCCGATAACCTCTTTCACCCG

GTCCGCCGGCTCGCCGGCTTTACGCGCCTCCCCGGCCACTTCCCGGGCAGTCTGTTCCGC

CTGTTTTTCCATTTCCCGGCGCTGCTGTTCTTCTGCCGCCCGCTGTGCCAGTACCTCTGG

CGGGAGGATAATGTCAGCCCCGGCCTGCGGTACCGGAGCCACCGGCGCCGGTTCAGCCCA

TACCCGCCCACCGGTCATGGCCCCGGGGTTCCAGGGGCGGTCATCACCGGCCAGCCGCAC

CACCACCCCCGTATCGGGATTGTCGCGGGCCATTCTGACGCCCTCCCCCATATTCCCGGC

CAGCAGGCTTTCTCCGTTGCGGCTGTTCTGCAGCGCCACGAACCGGGCGTCTTCATTGCC

CATAATTCGTCCCTCTCCGCCGATAGCCTCCAGCCGTCCGTCCCGATCGGTCAGCGGGCT

GAGCCAGATACCGGCGGCTTTCCCGTTTTTATCAAATGCCGGCAGCGCCACATGCGGCTG

AGGGTACTTTTTCCCCGGAGAAATGAATTTTCCTGGTGAACTTCCCTGTGCCAGACCGGA

CTGCTGCAGGGCTGCCCGGCCCGCGGCGGTTTCATCCAGTGGCCTTGCCCGCCCGAACAG

CAGATCGGCTGTTTTCACCGCCCGGTCGTTACGGGGTTCAAGAATATCGTGCGCCGTCGC

TTTCTCAGGTGAATGCTTGATGGCCTTTATCCAGCCCTCACGGTTGTCGGTGTAGACCTG

AACATGCTGTTTCATGCGGGATAACGCCACATAGGCAGACTCAAAGCTGGCCATCTGTTC

CCGACCACCGGCCACCCCTTCCAGCGCGATGGCATACGGTTCGCTGGCCCCCTGGGCGCC

GTGGGCCGTAATGGCGTAGGCGAGGTCGATATGCTGCTGCGCCTGATCCGCCTTCGGGGT

CAGCGTACGGGTGAGTTTGCCATCAGATAGCGTGACACTGTCACCCGAAACAGACTGCAC

CTCCCAGATACTGTTGGCCACATAGCCGCGCTCCAGGTCACTTTTGCTGAAGCGCATTCG

GTCCCCCTGAGACACGGTTATCTTTTCCTGACGATAGAGCGTGACGCCTTCTGCCGATGC

CTCCCGGGGTGAGATATATCGCTCCTTTCCTTCACTGTCTGTCAGGGTGATCAGCTGATT

AGCCTTATCCACCTTGCTGATACGGTGGTATACGTTATCAACCAGCGCCACCGCCTCCTT

GTGAGCCGTCCAGGTCGACAGTTTGCGCAGTTCACCGTCACGGATGTTACTCGTGACCAG

CACCGGCAGGGTGATTTCCTCTTTGCCGGTTTCCCCGTTCTCCCGCCGTGCGTCATGGAT

CAGACTGTTCAGCGCCCGCCGGTCCTTATTCAGATGGGTGATCACCAGCGTCTGCGACTG

TGCCTCCGGGGTCCGTCCGGTATAGTCCTTCACCAGCGCCTCGTAGAGCGTCGCGGGCTG

ACCTTCCGGCAGGGTTTTCCCCTCGCTCAGCGCCTTTTCTATCGCCTTTTCCTGCTTTGG

CGTGAATTCCACCACAGAACTGCCCGGCGCCCAGGCGCCTTCTTTTCTCGGCACCTGCTC

CGGCGTGACCTGCTCGATGGTGGTCAGGGCGCGGTGCACATCCCGCTCAATCAGGCTGTA

GACCGCCGGTCGCAGCTCAGGCATCTGGCGTACAATCTCTTTCATGATGGCAACGTCGGC

GGCGCTGCGCTGCTGCGTCAGCCTGAACGGCTGGCCCGGCGCGATGGGCTGCAGCTGGTC

GTTATCCCCACTGGACACCGCCCGCCCACCGCCGGCGACGATGAGGGAGTGGGCTTTTGC

CATATCGGCCAGCCCCACCATTGAGCTCTCGTCGAGCAGGAACAGGGTGTTGCTGAAATC

GGGTGTCTGGCCATTGCGCTGTAGCAGCTGCGTGTCGTGGAGGAACGATGCCGTCGTGCG

CGCATCCACGCCAGCACTCTGCATTTCCCCGACCGCGCGATGCGTCGGCGCCAGACCGAT

GACGCGCGGACGGGTCTCTTCCGGCAGCAGACTGATGGCACTCATGACTGCCCGGAGCTG

GGTGGTTTTCCCCACCCCGGCATACCCCTGAACCACCGTGAACCGGTCCGTGCTTTCCAG

AATCATCCGGGTCGCCGCCCGCTGTCCGGCGGTCAGGTCCGTCATCAGACTGGCCGGCAC

GCGGTCCATCAGGGGGGCCACCGCGTCTTTACCTTCCAGCACGTGGGTCAGGATGCTTTT

TTCGGCGTCCCAGGTCTGACGGGAAATCAGCAGGTCATTGCCGTAGCCGTGCGCCACCGG

TACATTCAGCAACTGCCCCGACCTGATTTGTGCCTGGATGGTCGTGTCGATGTCCGCCAT

CGAAACCTTCCCGCCCCCGGTTTCCAGCGCCGTCGCCAGCAGCTGGGGCCGGGAGAAGGT

CAGTTTCTCACTTTCAAGCAGCGGGATGGCCAGGTGAATGGCCTGTTCTGCCGGGGTACG

CAGTCCGGCCTTCTGCTGCGCAATGGCCGCATCCAGGTCCGTCTCGCCGGATCGGGTCTT

CAGCTGCTCTGAGACCACGCTGAAGGCGGTATGCCGCGACAGCTTCTCCGTCGTGCGCGC

CGCATCCTGCGCCGAGTACAGCCGGAGATGACTTCCGCTCTGCGCCAGCTGGTTGAGGGT

GGCGTTATCCAGCTCACGCTGCGTCACCGACGCAAAGACCGTTGCCGTCTCGCTAACCGA

CCTGCCGGGACTTTCCACCCAGCCGTGGCCGATTTTAATACCGTCAAACACGCCCGCGCC

CATGGCCAGGGTCTGCGTGGTTTTCTGCCCCGGCCGCTGTACCGTCAGCTGCCCGTCCTC

CACTTTCATCACCGTGATGCTTTCCCCGCCCTTCAGGCGTGTGTCCGGTATCTTCCCGAG

CACCGCCAGACGTTCCCCCTCTGCCACCGGCAGTGTATCTGCCCGGAACAGCGTCCACTG

GCTGTCGACCGCGGAAACCTTCAGATCCAGACGGACCCCTTCCCGGTCTTTCAGGGTCAG

CATATTGCTGCTCCCGGTCACCCGGTCAATGACAAAGCGATCGTGCGTCCGGGTCTCCGG

ATCCCAGCGTTCCATCACCATCCCCTCCCGGTAATAATCCCGCACGCCCCGGCTTTTGCT

GTCCAGCCACACCGGCGTCAGGGCTGTAATGGTCGTGTCTTTCTCACCCAGCACCCCCTC

CTGTCTGAGGGAGTCACGGATAAGGCCGTTGAGTACGCTCTGTTCACGCGTCCCGCTGAT

TTGGGCCACGCTTTCCTGCCCTTCACGCACGCTGACGGCAAACTCCTGTGCCAGCCGGCT

GTAGCGTGCTCCTTTATCCGGTTCACTGATGATGTCGGCTGTGGTCTGATGGCCACCCTG

CCAGCGATACGTATTCACGCCGCTGTCCTTCAGCACCGTCAGCGCGCTGCCGGTCCCGCT

GCGCTTCCCGCTGTCGGAGAGCAGGACCTGCACGTTATGGCGCATCGCACCATCGAGCAG

GGAAATCGTTTCCTTCAGGCTCAGCTTCTCCGCCTGATCCACGATGAGTGTTCCGCCCGG

AATAAACGCCGTCCCGTCCTGCAGGGCGGATTTACCGGTCACCGTTTCCCCGGCCAGACG

CACATCACCGGCGAGAAAATCACGTGAGCGGTTATCGGCCGCCAGGATATGGACGTCACG

CCCCTGCTCCCGGGCCATCAGGGTTAACTCGGCCACCCGCTCCCGCTGGCCGGTGGCACC

GCCCTGACCGGAAACGATACCCATTACCGGGCGATCCTGCGCCAGCACACTGACGGCATC

GCTGAAAGGGACCTGGCGCACCACAAACGCATCAGGCGTGACGGAGACATGATTCTGGCG

CTGCACCTCCTGACTAAGGGCTTTGACGGCGAGTTCATCGAGAACGTGGATGTTTGAGGT

GAACAGGCCTTTCTCGCGATCGAGAGGGATAAGCTGCTCCCGTTCAATGGCGGCATCGAT

GCCCTTTCTCGCCAGCTCAAACACACCGTCCTTCGCCTCCAGCTGGCCGACCGTGCGTGC

CAGCAGGTCGGCATACGTGAACTGCACCTTGCGGTCGCTGAGACCGGCAATCGCTTTCGT

CACCACATCCGTGATATCCGGACCGTCAGTGTTCACCGGCGCGGCAGGTGCACGGGCCAG

CTCTGCGGCTCGCGCATCGGCGGCCTCACGGTACCCCCGGATGTCAAACCCGGTCTCCTT

CAGCGTGTTCATCCACTCCACCATCTTCTCTGCCGGATCGATGGCGTCTTTCGACTTGCG

GGTATCGAGCGCGGCCACATCCCGGGACTTCAGGGAGGCATCGGGCCCTGCGGCCTCCCT

GACCTCCTGAGACCGGGTGGAGAACGGTTCCACAGGGACCCCTTTCATCTCCCACATCCC

GTGTTTGCCCACAACTTCCGTCTCATAGCCAAGCTTCTCAACCAGGGGTTTGAACGCCTC

CCGGTAAAGCTTCCCGAACGCTATCTGGTTCGCGTACACGTTCTCGATAAAACCTGTTTT

ACCGATCTTATCTGTGCCGAGAGACTGCCATTTGTCCCCGTTCTGCGTGGCGTTAATGAC

GACGGCATGGGTGTGTATCTGAGGTTCCTGGTTACGGTTCGTGTCGTGGTTGAATTTCGC

CACAATCAGATTTCCGGTCAGCACCGTTTCGCTTTTACCGTCCGTCATGACCCGGGTCGC

GGCCAGCGTCTCCAGTTGCCGCACCGCTTCGGTTACCGCCTGGTTGTGGGCATCGATAAG

GCGTTTATCGCCGCCCAGCATCGCCATGACCGACACGCTTTTGGGGGCCGAGAAGGTCAG

GTCATAACCGGGCCGGTGCTTGTTGGCGCCGTCCTGTATCCGGGTCAGGTCGCTGCCATC

CGGCAGCTTCCCTTTCAGCAGTTCCGTAAACAGCGCCTTATCCACGGCTTTCCCGTCGAT

CCCCAGCGCCTCAGCCCCCTTACCCTGCCAGCGTTCGTCCATGCTCCCTATGACGTAGTA

ATTATCCTTATCCGTATAGTAATTACCGGCACTGCCCGCCGATTTAACGGAGCCAATCGA

CATCATCAGAAGTTCCCCCCAATCTCGACATAATCCTGTTCATCGTGGCGGTGGCTGTGG

TTGATATTGACTTCCTCACGCCGCTGCATATCCCGCTGTGTCTGCTCATCTGCCAGCCAG

GCGTCATACGCCTGCATGTCCTCGATGACACCGTCCTCGTTCATGCCGGCCGGCAGCATG

TCCTGTCCCTGTTCCGCAGACTGCTGCGCCAGCTCCTGTTCTGTCCCGCCTGCAGCTGCA

GCAGGGGTACCGGCAGAGGATGCTGTTGCGGCTGCAGCGGCAGCAGCGGCTGCTTTTGGC

TTGATCAACGGTACGGTCGTGAGCCGCAGGACGGAAGGCTCCGTTGCTCTGACGGAAGGT

TCCTCTGCCGGCATCTTCGTTGTCGGCGGCGCTTTTACCGGTGCCGGAGATACTGTCATG

TCTGCTGGCGCAGGCTGACTGACCGGCTCAGGTTGTTCACCGGCGTGACTGTTTGTATCA

GCGGGCCCGGATGCCGGCGCATCCGGCGTGAAAAGTGCCCTGGCAAGACTGCCTTCAGCT

TCCCGCGCTTCAAGCAACGCACTGAGCCGCGCATCCACCCGCGCATCGAGAGTGCGAGGA

ATAAATCCCTCGGCAATTTTCGGACGCGGTTTGTATTTGAGGGCCAGTTTCACGGCCGGA

TACGGCCCGGGCAGCGTGACATAGCAGGACAGGTCAGGCAGCGTCTGAATATCGGAGTAA

CTGACCAGCGTTTCCCGCTCTTTTTCTTTCCCGGTCGATACACCATCACGCACCGGGTCA

GCACCGTAGGAGTACTGCTCGCTGGCCTTGAGGATTTCCTTCTCGCCAATTTCACCGGCA

GCAAACTCCGCAATCTCTTTACTCGGGGAGCGGAAGAAGGCTCGGGTGTTCATCACGTCA

AAGAGCGTGGCGGCAGGCTTGACGCCATAGATATCTTCCAGCTGGGCATAGGACTGAATA

CCGAACACATAACAACCACCAAATTTACGCGCCTCCGGGAGGATTTCGACCAGGTCCGGC

AGCTTGTGCAGCGTGGGGAGCTCGTCGGCGAAAATCCACACGCGCCGGTTACGGTTCTCC

CCCATCGCCAGCAGGCCGCGGATAGCAATTGACAGCCACATCGAGATAACCGGCTTCAGG

GAAGCATGGGTGTCAGCGTTGGAGGAGATAAACAGCCAGCCATTGGGTCGGTCCTCACGG

ACACCGCGCATCCAGTCCCTGATAGTGAACGGCTCCCCGTTCTTCTCGATGCCCTGCAGG

TAGCGAATAGCCTTGACGTAGTTGGTCAGCACGGCACGAATGGAGATGGCCGTTTTCTCA

ATTTTCTCTTCAACCAGGTTCGCTGCCGGCGTGTTCTGCAGATAGGCGCGCAGCTTGTCG

ATTTTAATGGACAGCATGGTATCAACCAGCTTCTCGTAGCTGCGATCCTTGTCTTCACGC

ATCAGGTACGCGCCTTCGGCAAAGATAGTGCGACCGGAGCCCTGCCAGAACGGGTCTTCT

TTGGTGCCCATCGGGATAAGAGTGTTGGAGATGTTGTCGAAGTCCGGCAGCGTCAGGCAC

TCTTTCCACAAATCCCAGGCCGCGCAGCGCGAGTCCAGCGGGTTGAGGATTTTATCCAGT

GACGGGTCGTAATAGCTTTTGACGAACTCACAGGAGCGATCGTAAATGATGGCCATATCG

CCCCGGGCACGAACATAATTCAGTAGCCGGCGGATTACTTCTGATTTACCGGAACCCACG

GTACCGTGGAGGCAGAAGTTCTGGATTTCGGAGTTTTTAAGAATAGGCAGATCGCCAATT

TTAATATCGGAGGCCATACCATCACGCTTCATCTGGCGGGCCACTTCTTTGGGCTTATCG

GAAAGCTGGCGCCCGCCGGTATTCTCATCCTCACTCTGCTGTTTCCCCTGGCGGCCCAGC

ACCCAACTGGCGATGAAGAACGTCACGATACAGATAACAAGAGAAACCACGGCTGCAAAG

ACGAAACTGGTCCACAGCTGCTCTCCGCACCAGATAGTATATTTATCGGCCAGGATTTGT

TCTGAGGTATATTCCAGCGACTGGCCGTAATACTGAATGGTGTATACCGGCTGGGAACGA

ATAATATCGCGCATCGGACCCAGCGTCGTACACCACCAGTATACGCAGCCGTTCACAAAG

GTTTGCCAGCTGAGCCGATACATCAGCATCAGCCCGCACAGCACCCAGAATAAAATAAAC

AGCACGTAGAAAATAATATTGGCAATCTGACCAAACATGCGAAAGCGCATATTGGCGATC

TGACCGCCCTGCGTCATATCTTTGGCATTGAAACTCATGGCACTAATCCGTCAGTAAAGT

ATTAGGGTCGGAAGGACAAATTAATCAGCGGAAATACACCGGCACAAAACAGGATTACAG

TCATGCCCGGATCCATTGATGGCCAGGCCGGATACTGACTTCTATTAAGAGGTTATGCAG

AAGGTATAGCCCTCTGAGCCAGGGCAGTGCCCGCCTTTAATATACGACTTCGCCACCTGC

CGTCCGGCCTCATCGACCAGGGCATACAGTGTGGATGGCAATGTTTCAGTCGTGTACTGC

AGGCAGACGCAGTAGCATTTCACCGGATGTTTAATCATATCCGGACGTTCAAACCAGCCG

GTTGACGGGAAAATCCGTGTGCCGAAGAGCCTGTCAGAAGGAAACTGAGTCTGCACGGAC

CAGGCAAACACGTCGTCAGCGCTGTCGCGGCGATTGACGCCGGGGATATACAGATTTTCT

GCTTCGCGGACAACACGGGAGGCAAGAGAGGACAAGGCGGAGTCATCCGTGCTGGCCGGG

CCTTCCACACATATGGAAAGATGGAAGTATTCCGGTTTGCTCTGTACTTCTGGCTTTGCA

TCGGAAATAACTGACGCCGTGTTTCGCTTACGCTCCACGGAAGACGTCATTATTTTTCGG

AAAAAGACACCTGCGATGAAAACAAGCAGAAGAATAACTAACGCGCTGCAGATATACATG

ATGTGGTCACTGAAGAGAGAACAGACCTCGCGATGTGACAGGGAATCAATTCCCCCCGCT

GCAGGATGTGGGTAAATATCGCCAGGCATCAGTTCATGTGTATCAAGAGACCTGACAGGC

ACAGATATTGTCATAAATAACCTCTGTTCAAATAAAGACGAAAAGACTCCGCCGAAGGCG

GCAACGCCTCACAGATGCACAAATAAATTGCGCAACTGTTCACCGTTTAGATGTGGAATT

AACTGATTATTTGACGAATGAATTCTGACACGCCGGAAAGGTGATGCCAGTCTGGCCCGG

AGTACCCGGGCCGTGGAATAGAACGTTTACAGGATATTAGCGATCGATTTTGCCAGCTGG

TCTTCAAGAACAGGCTGGGCTTCAGGGAACTTGAGGTTAACTTTATTCGCGTTAGAGACG

ACGCGAGTCTGGTATTTATGCTGATTACCCGTTTCAGTACTTGTCTGCACTTTTGCTCCG

GATGTTCCCTGACGTAATACGGCCACGTTATCAGTCTGAACCTGTGTTTTGGTTCTTTCC

GCGATCTGAACATCGGTGATCATGGTGTAGTTCACATCTTCCACCATCGCGTCAGCCGCC

ATTCCGACCAGACCGGCTGCAAGCCCTACTCCCAGGGTTGCTCCCGCGGAACTGGAGTTG

TAAGCGGTAATCCCCGCCCCAAGAGCGGCGCCAGTCACAGCGCCCTCATAACCCCGGCTT

AACCAGCCCTGAGACTCACGAAGGTCCATTTTATCGGCCTTGAGCACATTCGCCTGGATC

CAGTAGCCCGCCGTATCGGGGTTACTGACGACCTGATATCCCTTTGAAGTGACAGCGCTG

GCAATTTTTGCCTGCAGGCCACTCATATCCTTATCGGAGGTATTTTTGATTTGCAGATAA

ACCGTCTTATTATTTGAAGGTTCCAGCCAGATTGTTTCGCTCATCTGGGTTTTTACTTCC

AGATTTCTCTTTTTAATAGCGGTTCCCATTGCACTACATCCAGACAACACCAGAGCAGAG

CTGACGACCATCACAGCCATGAATTTATTAAGCTTCATCCTGAATCCTTGTGACATAATC

AATACGAGTGAATACACATTCTCTTATGATTTCGGAATGCGCATTCACTATATACGAATT

TTAAACGAGATGTGAAAACTAATTACAGTCTAAGAAACCAATAATAACAAAGGAAACTTT

TAGGCTGTTAACAAACCACCATAATTGATAGGTTGCCTCTGGATCATCCCCCCCCCAACT

TTTCTGCTCTGAAAGAGTTTATCGCAGATGAGAGTACCGAAAGTTGATATCGTCCAAAAT

CAATATTCATAACAAACCATACAAAAATCGTCGCAATAAGAATCATGAACGAAAAAGGAA

ATGGAGAGGCATAATACACTCTATTAAATAGTGCAAGCGCTAGAATTAAAGCCATATACA

CAAGTGCATAGACCATAACTTTTCTAGATATAAACCGATATACCTGCGAGCGCATTCTAT

AGGTTCTGGGAACAGATAAAAAAAGTGAACGCGCACTTGCCACACCAAGCAGAACAATAA

GACTTATAACACCGGGGAACACCAACACCCAAAATATGAACTTAACAGACAAATACCCGC

CCCCTACACTAATTAGGGCGCAAATCATATTCCAGGCGGCAACAATTACTCCAGGCCATA

GACATGACCAAAAAGATGGTATCTCCATTTCACCTCGTGAAAACACATTTTTCAGCTCAT

CTACTTCTTCAATGAGGATTTTATTGGTCATCATCATTTTCATCTTTTCCCATCAAGAAA

ATCCTTTTGCGTTTTCGCCGCTTTTTCCTCTAACTCAGCCTGAGAGTCAGCTCCAGGTAA

AGAATTTACCTTACTCTTTCTTTCATTATAATCACCTTTAAACTCATTTGCTTTAGTTTT

ATGGTTCTTTTCCATTTCAGCATTTTCACTTTTCACCTCTGCGCCTTGCCGTTGTATGTT

TTCGCGGGTTTCCTGATGCTGTTGTTTATTCTCTGTAATCATCCTATCCACCTTCTGACC

CACGTTATCCTTAATACCCGCATCTTGTGTCATAACATCGATACGACGAGAATTTTGTCC

GTAGTCGGCCATTACCGAACCATTGTCACCACCACCTGACACCCCAGCCATATTCTGTCC

GATGCTTTCACGCCCCTGTTGATACGCAGCATCAACCCTGGGTTCTACCTGCTCTTTGAC

GAATTCACGCGCCAGGGCTTCACGCTGCGCCGCAATTTCAGGAGAACTGGTATTGGTCAG

AATGGCTTCGGCATCCTGTGGAGCACGATGCTGAACAAAGTTCGCAAACTGCTGAGTCAG

GTTTTCGTTCATCTGGCCAGTCATGCTCTCTGTGCGTGATGCCATCTCACTGTACTCATG

GCTGCGTGTCCGGCTGCTTGTATACTGGTCATAGCTGTTTTTGGCACTGGAGAGTGACGC

GGCAAACTGGTCAACACGCGAGCTGGCATTATTATCGGTAATATTGCCCGATGTGGTGGT

TTTGCGGCTGGTAAAGTAATCGGATGCTTCCTTAAAGTCTTTGGCCGCCTGACTGCTGGT

ATCATGTCGGCTGTCATTCGATTCCCTACCGGAAGTTCCAACGTTATCTGTATTACCTGA

GCTGTGTCCCCAGCCTGCACTTCCTTTACCACCAACTTCAGCAGAAAAACCACTGCCCCA

CTTTCCTAACTTGCCAAACAGCTGATCCCCAGAACTCCATTTACCAGATACATGTGCATC

AAATGATTGAGTTCTTTTCGATGAATCATCCATCAACTGCTGGAAAGACTCCTCATTACT

GATGTTGTTGGCTTTCGCATTAGCAACAACCGCATTCCACATCTTGCTTCTGGCCATCGA

ATCCTGCGAAGACTCGGTAGTATCGGCCCCTGTCGTTGTTGATGTGCTGTTCCCTTTATT

GGTGCCAAATTGCTGCAGACTATTCCAGGCACTTGTCACGCTGCTGTTATAGCCATGCAG

CGCGCTTTCGGCCTGGACATCAGCCTCACGGGCCATCTGTTGCTGCGCACTGGCTATCTG

ACGACCGACGTTGATATCCACCGGCAGTTTTGACATTGCACCACCACTGTCCCAGACCAT

CGATCCATCCCGCGTCTGCGTGCTCATACCCCCATTCGCCAGCTGCCGCGACATCTGTCC

GAAACTGGTTGTACTGTTGGTACCCCAGCTGTAGCCGCTGACGTTCTCCATCTGCATGTT

GGCGAAAGAGTAATTCCCGTCCACCACGCCGGAGGCCGCCTGCGATGTTGCACTGAGCCC

CGAAGAAGAAAAATGGCTGTAGGCACTGGAGAAAGCGGCCCCCATGCTCTTCACGATCCC

CCACGACAAGGGCGGTATCATCACGGCAATATAACCCGCGGTGGTCGCAATATCCGAGTT

TTTGAGCTGAACCTGCGACAACTCAGAGAGAACAACCGGCACGCCATTTTGCTTCGCATA

GTAGGCCATCGCGCTGTTCAGGATGGCGAACAGTAATGGCCACGTCTGCAGCCAGATAAG

CGCAAACACATACCCTTTAAGCACCTGCAGCGTCATCATGTTAAACATGGCAGCCATCAC

CATGATCGGGAACATCCCAATCATTAAACCCATAATGACGGTCTGCATCAGTGGAAGTGC

GCGAAGCGCCTGGTGCCCCATTGTGGCCTGTGCCAGCCGCTGCTTTTCAAGGGATGATGT

GTTAGCCATATTGACCAGACTGGCGGTGTCCCCGCTGCGGGCCGCATAACTCTGGATCCC

ACTGCGCAGGGCGTTCATCGTGACGTTCTGGCGGATAATCTGCCCGGCGCTCTGTCCCGA

GCTGTAGAAGTAATTGTAGCTGTCGCCAATCATCTGGCTGAAAAGCAGATCGGGATTAGG

TTTGCCGCCAAACAGCTGACGAACATAGTAGTTCCAGGTTTTCCCGCCTGTCTGAGTATC

AAGCGCAAGAGCCGATTTCAGATCCCGTGAGGCCTCTTCGCATGTCTGGAACTGGTTGTT

TTTATCAAACACGCCACGCAGTGGGCTTGGGTTTGCAAAAATCAGGGTATACGGATCAGG

TGAATTCAGTAATTCTTCAAAAGAGTACTTATGATTGAGGAAAATATCGCCCATCACACA

GTTTTGTACGTAATCGGAAAACAGCGTCGTAATCTGAGGATTTTGTGACAAAAAATCCGT

ACTTTTCGCGACCAGATTACTGCCAAATAACATCCCCGTTTTACTGTACGTGACGCTGTC

CGGCAGCGCGAAGACCATCTCATAACTCTGGATAAGCGCGTTTCCCACCCTCGTTGTCAG

CGACGCAGGAATGGCAAGACCAATAGGAACATTATCGACTTCATAGACCTGCGCAACGTT

ACTGTAATCGATGATCTGCACAGGGGTACGAATGACAACCAGCATAGAGACCAGGGTGAG

GGAAAAGACCCAGCCAATAAGGTCCATTACGTTGTGTTTTTTTACCCAGTTCCCCGCCAC

AATGAGTACCGAGATGGCGATACACATCTTTTCTATAGTCGACCATGTGCTGGTCCCCAT

AAACGCCGCAATCGCGTTCAGGTTGCCCCGTAACCAGTCGCCGCCAGCAATGGCATATAT

CTCAAGCATTACAGATTCCCCCCAAAATGATAGTTATTCTGGTAGCGGGTCATCATGCGG

GCAGAGACCTGCTGGCGCATGTAACTCATTTGTCTGTCAACCACAAGCAAGGCGTCCTGC

TGGACCTGAACACGGGACTGGAAAGCGGCAATCTGCACACTCGCCTGGTTGAGATTTTCC

ATGATCATATCCATTGTCGACTGGGGATAATTACCGGTTGAGATCATCGCCCGGGCCTGC

TGGATAAGTTCCTGAATGTACTGCAGCAGGATGTCGTAGCCGATATAGTCCGTCAGCTGG

TAAATAAGTGAGTTAGACACCCCGAGCATCTGCGGATCGACCAGGTATTTGAACACCGGA

ATGGTGGTGCTGGAGATAAACCCTTTCTCCTGCTCTGTCAGTTTTTCATCAGCCACCGCT

TTATTCTGGATACTGCTCAACAAAGCGCGAATCTGATTTTTGAGCGCCTTATTGGCGGTG

ATGGTTACGGTCGCATCAGCAACGACCTTGAGACATTTATCCGAGTCATTGCAGTGGTAG

ATTTTAGCTGTGCCGCCCTCCATCATGGCTTTAATCAGATCCTGGTCAGTGGTGCGTGCC

GGCAACGGGGTGATCTCACTGTTCTCACCAAAAATCAGCGTACCGGTCAGGGTCATCACA

AACTCTTTCAGCTCCTTATTGCCATCAAAGAGCCGGTTCTTCGATAAGGCATTCCACATG

ATGTTAATGTTCTTCATCACACGTTCTTTGTCTTTATCGCTGGCCTTATCCTGGACGCTG

TCCATCTTGCCGCCCACCGTACAACCCTGGCGCGAGGCGGCCCAGTCCGAAAAGATATTG

CTTTCACCGGCAATGTCCTGGCAGACCTTTTGTTGAGCGACCTGGGTACGAGGAAACAGG

CCACCCACAATTCCCTGAGCAGCCTGGCAGGAACTGAGGTTCATGCTGTTCATGTCAGTG

GCCATCTTTTGAAGGAAGTCCTTTGCGGTTTTGATCTCCGGAACCGTGGTCTGCAGGGCA

AGGTCAAAGAAGTAACCCGCGGCGTTGGACATAATTTGTTTGCCAAAGCGCTGCAGCTGC

TCGCTGTTGATAAAGGAGAACGACCCCAGGTACGCATCGATGCCGCCGCAGCCGGCGTTA

ATATCCGGCAGGGTCATGCTGACCAGCTGGATCGTTTTCACCTGCGTTCTGGCATACAGC

GAACCGCCAGAGGCATAACCCGCCGCCTGCCCCTGCCAGACCTGTGGCTGGCTGGTATTG

GACGCAAACCCGAGCTTATTGAAGAAGTTATTCATGTCGCCATTCACGTCGGCGGCGGCG

CTAAATGACAGGCCAAGCGCGGCACCGCAGAAAAGTGACAGAAGTTTAATTCGCATCCTG

TCCTCCATTACGCACAGCATTCTTTTTAACTCTGTCATTTCTCAGAATAAAAAGGGTCTT

AAGGTGATAACTGAAAAAATTGCGGATTGCTAATGTCACTCCGGCAACAAAGAACCCCAC

CCCAACAGCGATCAGCGCATAAGGGATGGCGTACATCATAATATTCCACAGGTCTTTTAC

TCGCAGGTCACCGCTGGCTATCCAGTCATCCACGCAGAGATTAAATAAAAATCTCATTAT

CCATAACAGCAGAGCACCTGCAGTGAGAAACACAATGAATAATTCCAGATAGATTTCCAG

ACGCCTTTCCCGGTGGATAAATTCCGGCTTCAGTTGTTCTATTTTTTCTGCTGCTGTCTG

CCCGGGTGCTTTTAAACTTGCTGGAAATAAAAACGCATACAGTCCCGTCGAACGTATATA

TTTGTTCATGGCTATTTTCCTTAATCACTTGCTAAGACCGGATATAACAGAGACTCAGTG

CATCATCTGAAATACCGTATCCACTCTGGCCATAAAGCCCTGTGCATCCGTGGCGCCCTG

CAGGATCGGGTACGCTGCCAGCGTGTTTACGTTCACCAGAAACGTAGTCGGTGTGGCCAC

CGGGATATTGGGGAAAAAGGTCTGCATCACGTCAGGAGGCGCCGGCAGCGCTTCCGGAAA

CGCGTCATCACCCTGTCCGTCAATGGTGTAAGAGAACACGGAGAAGCCATACTGTCCGGC

CAGCTGCTTCAGCACCGGGTCAAATTTATGACAGTAGGGACAGTGTCCCTGCATGAACAG

CACCACTTTCCAGTCGCGCAGGTCCACCTGCTTTCCGTTGCTGAGTCGTAACCAGCGTGG

CTGAGATGCCCCGCTCACCGCCTGGGGAGTGTCGCTCTGCGGGGAGGCCGTTTCAGTACC

GGAGATACCCCGCGGATCCCAGAGCGACTTCACCTCATCGAGCGTTCCCGCATGTGCCAC

CCCAGCCAGTGCAAGGGAAAGAGCCAGTGCCGCCAGCGGCGTCTTAGCGAGGTTCATCAG

GCTGTTTTTCACAGGCTTTCTCCTCTTTTTCGGCTTCAGCAATCAGGGCGTTTAGAATGC

GGTATCCCCCGAACACCACCATACCCAGCCCGAAGATTTCCCCGGCCTGGACGGCCAGCT

CAGGCTGTTTTCTGACAAGCCGGGCTATCAGGTGGAAAAACACGCCCACGGCCAGCACCC

ACATCCCGGTGATATCTAAATCCGGAAAACGAATATTTCGCATGACACACTCCTTAGAAA

TTCGGTTTAAAGTCGCTGGAGACATAGAGGAACTGTTTCGCCAGGTCGTCCTGACTGATA

AAGCCGTAACTGAGAGGCTTCACCTGGCCACTTTTAGGGTTAACCAGCATCATCGCGGGG

AAGAACTTCACGCCAAGCTGCTCTGCCTGGCCCTGGTCCGTCCGGCTGTCGGGCAGCATG

GGGTTAATCACTCCGTCAACCGACACCGGTATCACGCTCAGGCCATAGGTTTCGCGAAAA

TTTTTAATCACCTGGACCAGCTGGCCATCGATCGCTTCCCGGCCCCGGTAGAAGAACATC

ACGCCGTAGTGCTGTGCGAGGGTGGAGATAGCCTGTCGCTGTTCGGCATAGTCGGCAGCG

AGCTGGTTTTTTACCGTGCCGTTGTAGTGGCTGTACTGCAGGTTGTAATCGAGTTCGGGG

TTTTCCAGCATGGCTTTCTTCGCACTCATCGAGAACAAACCTGCCTGCTGCGTCCAGTAG

TTCTGCAGCCGGAAATACTTCACGAAGTTTTCAGACGATGGATACAGAATGGCTTCGTAC

AACGACCGTTTGGTGGCCGCCTGGAGTGTGGCGAGTTTCTCCAGAATATCCATTTGCGGC

GGTGGTGCCGCTGGTACGGCTTTCCTGTCCTCATCACGGGGCTTCAGTTTCTCGTTGTAC

CACTGCCAGCCCGCGTCTTTGGCGAAAGCCGGCATCAGGGCGCAGCAAAGGCACCCCGCC

AGCATGGCGGCATGTATTGTTCGCATGGCAAATACCCTTTTATGAATTAATGCGACTGGC

GTGACAGATGCTGATAGACACTGTATTTATCGAGCTGGCGCTGTACCTTTCCTGCATCAT

CACGGGCTTCAAAGCGATAACCGCTGCAGTACAGAGGCAGATAATTTATCTGAAGGTCCA

CCCGCTCCCCGTCCCTGATCACCCACGCGGCCTGAGAAACAGTGTCGCACTGGATCCCCC

AGGCCCGGTTGGTTGTCATAAATGCGTTAACCTGCCTGTCCCGCCACAGGCTGTACGATA

TAATGCTGACCAGGAGAAAGACAAACACCCCGACAAACACCATGACCAGCCCGTATGCTT

TTTTCTCTTCCATTGACTCTCCTGGTCACATAATAAGGAATAGCGGCATGCTCAGTACTG

AAGATATAAAAGCCTGCCGGTCCGCTGGCAGTTTCTGGAAAGCAGGTGAGTACTGAGCGG

CCATCTGAACCAGTTCGGACGAGTTAATCAGGAACCTGTCTGTATGCAGAGAGATATCCG

CAAGAACAGCCAGCACCATAACATGATGCTCCTGGGGTAAATTCTCTTCATTCAGAATGT

CTATAAATTTCTCAATCGTGATATATTGATTCATCTTTGCTTTTCCTTGCATTTATAACT

TTCTCCAGGACTGAGAAAAACAAATAACATACAGACATGGCAAACCCAGCCATAAGAATA

AAGACCACACTTTCGACATAATCACTTCCCGACGTCCCTTTGACTGCATCCCAGGAGAAA

TAAATCACCGGAGAAATAATGATTATTGTTAGCGTTAATCTCAGGACAAAATCAATAACA

GGCTTTTTGTGAAAACTCATTTTCATGATTATCGGTCTCTTTATTAGGCAGCATGGTTTA

TTGCGCGGATTGCTGACTCATGATTTCCTTAATTCGTTCTCTGGTCTTATTGGTGAGCAC

ATCGTTTTCCGGTATTTTTTGATTTTTCATCAGGTCGTCCATAAAGTTGGTGAAATCCAG

CTTGTTAAAATCAATCCCCTGGAGTTCCGCGACGGTAATGCCCCGACAGTCAGGACTGCT

GGCGCCGCCAAAACCGATATGCAGCTGACCGTTTCTTCCCTGCTGCTGAACGATCTGCGC

CAGTTTTGAGTCGAACTGGCAATAGCTCCTTTTTTTCTCCAGGCAAATCCCCAGAACCTT

TTTAGAGCAGAATTCCCCTATACTGACCGTCAGCTTGTCTTTTTTCGCTTTGGCCAGCGC

CTTTTCCTCGCTGCTGCAGCTTGCCAGCCCCACATCCTGGCCCCAGCCACTGTCTTTGCA

GCAGTTACTGAAGCCGGCAGCAAACTTCTTACAGAACTTCGCTTTTCCGGTGAATGCCCG

GACATCCACCCCGTTCAGTGCCGCGACGTCCTTCCCCGCGGCAGCCAGTGCCGCCAGCTC

AGACACCGCCTGCCCAAAGTCGTTGCTCTTCCCGGACGTGGCTTTGTCACATTCACCATC

AAGGCAGAAGACATCACCGCCGCAGATCATTTGCTTGCCACTCGTCCTGGTTTCGCAGGA

ATACGTTGCATATTCATGCAGGCACGTGCCTTCCTCGCTGGAGAAGGCGCACTGGCGGGA

TGACAGAGTACAGGCCGTATTTTTCATCAGGCTTTCACAGGAGCCGTTGTCCGCCGGCTG

CGTGAGCCAGGTATCCTTATATTTCCAGCAGGCCTCCGTGAACGAGTAATCCCTGCCTCC

GAGGGTGATGGTTCGCGTTCCTCCCGGACTGATACATTCCTCGCCCGTTTTTTTCCCTTC

ATCCTTACTGAACGGACAGCTTTCAACCCAGACGACTTCAGGTGCATAGACGGTTTCGGT

TTCTTCCATCACCAGGGTGACCGTGACCTGTACGGGTTTCTGGCTGGCCGATGATACGGT

CCGTGATGTTTTGCTTACTGAAAAGTTCTGCCCAGCAATGACCGCTTTGTCCACACCAAA

CGACTGATGAATCTTCCCCTTCCCGTCATAGGTATATTTCGTACAATGCGTGTTCTGACC

GCCTGAACACATCGATTCTGAACGTGGCCAGCTGATCACATCAATGGGGAACGTTCGTTC

AAAGAGGGTCAGGCTTTCACTCACTGCACTCTTGCAGCTATCCCGCACCTTCCCTTCGGA

ATCGCATTCTTCAATCCAGGGGATCACCAGAGGCTCACCATCCACCGAGGCATTCAGCAG

ACGACCGTTGGTCGGGATCGTCAGGTTGCCACTCCATTGCCGGGTACTCCGGGCATAATT

CAGCGTCACCACCTGCTGATAGGTTCGGTTAACTTTCTGTGTGGTGGCGTTATCCTTCAG

GGTCGCTTCCCGTGTGCAAAAATTTTCCACCTGCAGATCACGTTCGCAGGTATGGTTTGT

GAACTCGCTGCGGTTCACAACCTGGGCGGTACAGGACTGTCCGGTATCACCGACAATGCT

GTCGGCACGGGATTCTGTATCCTTTGCGGCCTGAATAAACGGCGCATCCTGAGATATCTG

ATCCGGTGGCCGGTTCGTGAACGACTCCGTAATCGTTTTGCCGGTATCTCCCTGGCTGAA

CTCCAGGGCTGAATCGCTTTTCAGAGAGCTGTCTCCGCTGGCAGTGACGCCGCCGTAGTA

TTTTGTCTGATCCGGGTTGTCGGTATACCCCGGCAGGTTTTGCTCACCACTGAAATTTTT

TAGTGAGTTCAGACCATTGCCCTGCACCTGTTTCGCAAAATCCGAACCGGCTTTATAGTC

ACTTCCACTGTCAGCGCAGGCGGGGGATGCCAGCCAGATGAAGGCGCTCAGGACAAAAAA

ATGCGCGGTCAGCACGGAAATAACCGTCTTCATTTACACCCTCCCTCATCCCTCACCATT

TCCGGTAACGCCATGAAGTACAGTTTATCTTTCATGGCTGGCTCCCGGCGGCATTCGAGG

GCGCATCAAGTATTTGCCGGGCCACCTGTGCGCAGTCACCGGTTTGTGCCACTTTCTCCA

GCGCCTGTTTGACGTGAATGTTACCGCGTACCACGTCATATCCGGCCTGACACCGTACCA

CCAGAGACGGCACACTCCGGATGCTGTACTGCGTATATAGTGTCGGGTCGATCTGCACGC

CGTCGGTCACGCCATCCTTCACCAGCTGCAGCACCGCGTCAGTGGTGGTCTTCATGTCGT

TATTGACGAGCCCACGCAGTGTCGCCGGAATGCCGTACTGCCGGGTTTCGTGCAGCATCC

GCTTCAGCCCCTCTTCAGGTATCGAGAAGGAGACAAAGTACAGCGCCCCTTCTGCCGGCT

TTTCCTGATTCGCCGCTTTCTGCTGGCTGACCAGATTATCGATAAACTGGCGGTCTGATT

TGGGCAGAGGATTACGGTTGATTTGCGCCTCAAGCTCCTGCTGCAGCTGTTTATCCGGAT

GCTGGCGCAGCTGTTCGCTGAGGTTCTCCTGCTGCTTCAGCCATTCTCTGTCTGTAACAG

AGGAGGTTTCAGCCAACACTGCTCGTCCGGTCAGCAAAAGCATGACCATAAACAGATTCA

TTAATTTCATGAGAGACTCCTGTCAGAGAAAGACACAATTGCGTTTACGCCACATCAGAT

AGCCATAGTTCTTACGGGTGTTGGGTGGATTTTTACCGGCCTCCCAGCGCATCACGCTGC

GCCCCACGGGATGGCACTGGCCGCTGTCCGGGTACATGTTCACCATCTGATAGCGCCAGC

GCTCTTTGGGGATGATCGGGGACGGATACTCATAGCAGACCGCCTTGTCCTTCCCGATGC

TCTCCATAATTTGTCCCTGCCGGTGAAGCTTGTACGCCATGCGCTCGCTGACAAGTAACG

AGGACTGCAGCGGACTGGACTCGTTGCTTACCCAGCCGCTAAACGGGTACATCGAACCCT

GAGAGCCGGCACACCAGAACAGAATATCGAGTGGCATATGAAACGCGCTGGCCATAGCGT

CAGCCGCGCACGCCCCCTGTGCGATGGGGTTGGCAAACAGGATGGCTTCCGGATTCAGAA

TGGTGGTGAGGCTGCTGTCCACCCAGGTCGGGTCAATCTCGGACAGATAGGCTATATCCA

TGTCTCCGCCTTCCAGACAGCCTGCGGAGGTGATGATGTTCAGCCAGTAGGTCAGCGGGT

ACTTGTACCAGTGAACGTGATAAAAAGCGCCGTTCACCTGCTTATCGTCCTTTCTCGCGG

TCCCCATACCGGTCTTGCCGAGATTGATACTGAAGCCCCCCAGATTGACCATACAGCCAG

GCGAACGGCTGACGTCCGTCATGGCCATCGGCTCCCAGTACCCGATGGCCAGGCCGGGAC

GAACAAAAATCGGTGGCGGCGCCGGACACAGCTGCAGGGGACTACCCGGATTGCTGGTAT

CAGGTAGATCGCCTTTACCAACCTGCACGCTGCCGAGTGATAAAGGAAATATGCAGCGCC

AGCACACATCGGTGATCGGGTTAACAAACCGGCCCTCACAGGAGGGGTCTGCGGCGGCGC

GGCCACTGAACGTTGAGAACGCGATGCAGATTAAAAAAAATATGGCTTTCATTCGTCAGT

TTTCTCCCTGAGAACAAGACGGAGGGCATCGGTTTTATTGCGGACCTTTTCCCGTGTAGA

GTCTTCGGCGCCCTCCATCCCGGCCCACACCATCAGGGACAGGCAGTCGAAGAGGTAAAG

CTGGCGACGGTATGAATCCCTGTTCGTCTGGCGAACGGCGGACAGTGCATCGAGTTCACA

AGTCATTTCATCGATAACCTTTTCACCGTTGTATCTCAGCCAGCGGTACAGCTTCTCGTT

ATCGGTCCTGAGACGCTCAACCTCTCTCTCCAGCCAGCTTTCTCTTGTACTGAGTTCCCG

TATGACATTCTCCTGCTTACGGATGGTGGACCACATTAGCGTCAGCAAGAGCATCGTGAG

CAGGATTATTAAGGCCAGTATCATCGGCATCGGTTACCTCTTTTGAATAAAACGCAGCCC

CAGATCAGGGGTGCGGGACGGGCGGGAAGGTCTCAATATTCAGCCGTTCACCGGAGGGCG

CCGGCGTGATCCGCGCCGGGACCGCCGTCAGGCCAAATCGCTTGCTCAGTACACCGTTCT

GGTCGAAATAGATCCGGCTGTCCAGCGCTGCGGAGGTGTCCGGGATACTGCCACGCACCA

GGATAATTTTGCTCATCAGGGTTTCCGGCACCTGACGCTTCATCCAGGCCAGCTGGTCGG

CATCGTCACCATTGATGAAGTACAGGGTCTGGACAAACGGTACGGTTTTAAGCGGGTTCA

CCACTTCGCCCTTGCGGGCAAACACCCGCCCCTCATTGTCCTTCAGGTCTTCGGTCAGTC

GGATGCTGGGATCAAACCAGCGCTGCTCGTATTTCTCCGCACGCTTAATGCCTTCCACCG

GCGCCGGACGCTGACTGTTCTCGATAACCCGCTGCTTAAACGCATCCATCGTCTGGCCCC

ACTGGCCAGAGGATTGCAGCGACTGCAGACGCTGCGTGATGAGCTGCAGCATGTCCTGCT

CCCGGACGGGCCATAAATCCCCCCAGGTACCGAGATCAGCCGCCTGAGTCAGCGGCGATA

ACAGGCAGGCGGCGAGCAGACAGTCTTTCAGTCGTATCATTACTCTTCTCCTTTCATCCG

GCGGGCAATGTCGTGCTGGATGTTGCGGGTCACATCAGGCGCGCCCTGAACCACGGCAGG

TGAAACCAGAATGACCACATGATGCTGCTGCTGATACTCCGCCAGACTCTTCTCCAGCGC

GTCGTTAAACCGATCAGAGAGCGCTTTGGACTGCGCCTCTGTCAGCTGCTTCTGACTCAC

ACTGTCCATAAAGCTGTCGAGCGTTTTCTTCATATCAAAAGCCACCACCCGCGGCGTGGA

GTAGTCCAGAACCACGCGTGAGAGAAACGCGCTGGTTGCCAGGGCGAAAAGCACGAGAGC

AACGATGACAGGTATCCGGCGAAAGGTAAGAGAGGTCGTACTGACCGGTTGTTCGGTGTT

GTTTTTCATCACTGTTTATCCTCCATGTCATTCACCGGTATTCGGGATTCAAGCTCTGCC

ATTTCGTCTTTAAAGTTGCGGCACGCCAGTCCGTATACCGCATCGTGGATATCGACCCCC

TCCTGCCGGCGCGCTTGCATGTACTCAAAATCCGGGCCTTTGGAGGAGTACATCGCCCGG

CTGAGCGGGTCAACGAACAGGCGGTGCCAGGAGCAGTTCGCTTCCACCTGCAGCATAAAA

GAGGAGAACCACTGCTCTTTGGCCGAACCGAAGCCGTTAATCATGTCTTTCTCCAGCTTG

CTGAACTGATCCGGGTACAGCTGGTTATACTTGGCAAACTCTTTGGCTGACTGCTTCAGA

ATGGCCTTGTACGACGAGTTCCCCCAGGCAGCGCGTGCAGCGCTCGATGCGGTCGGGGAG

TCGAAGTCCACGATATTTTGCGTGATGGTGATGTATGCGCCGGTATGTCGACGCGCGGTA

CGGTAGCCTTTCTCGATAAACTGCCCCACTTTTTCATTCTTGAAATCAAGGAGCTTCCAG

CCCTCATCGATGACGTTCAGTTTTTTCAGGCCACGCGGTGACTGATACATCCTGTTCTCG

ATGTAAATAATCAATGAGAACATCACCGCGATAAGCAGAGAGGGCCGCGACTCCAGGCCA

CCGAGCTCCAGTACCACCATCCGGGCGTCATCGTGAAGTGTTGGTTTATCTGAGTTGAAA

TAGTCCCCGTAGATCCCATTCACCGTGTACTGATCGAGCAGGATTATCATCTCGTCCAGA

CGGCCCCGGATTGTCGGGGAATCAGCATATTCATCGCTGTCCTTCGCGTCCTGTAAAAAC

TGAACTACGTCATCAACGCGTGCATGATTACGCTTGCTTAACCAGGCCGCCTGAACTGCC

TGCAGAAGCAGACCTTCATGGACTTCATCGAGGTTGCCGTTCGGACTGGCCATCACCGAC

ATCTGATCGCGTATACGTTCTGCTGACATGTCAAAGTGAGCATCATCCAGCACGTTGGCG

AACGGGTTAAACTTGAGGGTATCGCCATCGAGGTATACGCCCCCCATGTTTTCACACAGG

GACTTATAGCCATCGCCCATGTCGAACACCCAGGCAAACCCGCCGGAGTCGAGCACACTG

CGAATGAGGGGCTGAATCAGACCGGTTTTACCCGCCCCGGACGTCCCGCAGACTGCCATG

TTGAAATTGGTATTGTTCATTCCCTCGTAGAACAGGTCGATGAACGCCAGCTGATTTCGG

TAGGTGGGCGCCAGGAGTCCCGCCGGCGCCAGCGGGCTGTCAGCGACGATCGGCAGGAGG

TTAGCCACCTGGAACGTCTCCGCCCGCTTCACCACGCCTGCCGCCTGCAGCTCTTTAAAC

AGGCCCTCACCACACTTGAACGGCATCATGGCCAGAAAGTTACGCAGGTGATGGTAGCGG

GCCGGGATCAGCTGGAAACCGCCTTTACGGTAGCTGTTGAGCACCTGCTGTTCAGCGGCG

AGAGAGGCCTCTGTGCTGTCTGCGGTGTACGTGGTGATATTAAAGAAGTAGGACACCAGG

GAGGTCTGGTTGGTCGCCAGTCGCTGGCGGATATCGCCCCACTCCTGCATTTCCTTTATC

ACGTTCGGAAAAAACTTCGCGTAGGAGGTTTTGCTTTTCTTCTCCACGTCCATGAATTTC

ATGTTGGCTTCATTCTGGGTCTTCACCTGGTCCTCCACCATCAGCGTCAGCGTGATGACA

AAGGGGCAGGAGATGGAGAGCTCCGGGTTAAGCAGGTTGGCGTAGTTATCCGCGGAGGTC

CAGAGGAAGGCCATTTCCGGATCACTCTCCAGATGGTAGCTCGTCACCCGGGTTACGCAC

TCTTTCCCGTCGCGCCCCAGGCGGCCAATTTTCAGATGACCGGCGGTGACCTGCATATCA

AAGCTGTCATCGACACACTGATAGTTCAGATCCTGATAGGGGTCCAGCTTATACGGTACG

CGGTACATCTCGTGCGGGTCCGGGTTTATCAGCTCGCGCATCAGTTCGACCAGCCCGGCA

GCATCAAGGATACGCGTCGGAATATAGGCACCGCCCAGTGACGCCCGCAGGATTTTAATC

TGGTTCTCCATCTCCACAATTTGCGTGGTGGAGTTTTTCTTCCGGGGCACGCAGCAGGAG

ATGTACACGCGGTAGTTACGCAGCGTCAGGGGTAAATCCAGTGCAGGAGGCAGGGGGAAC

TTCGTCTCCGCTGCCCGGAGATAGTAGGCCTGGGTGATGGCGTTAAACTTCTTAGCCTGT

TTACCGCTCCAGCGGAATTCACGCAGACCGTAGTCGATATCATTGCCGACCAGTTTGCTG

GAGACCAGATGAAAACTGACCGGGACGCCCCGGGGAAGTTTGCTGCGCAGTAAATGCTCC

AGTGTGGCGACGATACTTTTATCCGCACCGGGTAAAGGACGCGCCTCAAACATAAAACCG

ATGGTTTTGTTATTAATAAACAGCCCGGTCGCGGAATCATAATCCTTATAGGGCAAAATA

CGGCTGAACTGGGGGAAATTCATGCTGCCCAGCGTGTCATTGGCTTTCGCGGATTCGTCG

GGCAGCTTCAGTGCTGATACCAGTGAATTCACAGTCTGGGTGACGGCATCGATGATGTTA

TTACTCATGCAGGCGTTCCTTTAAGAGCATTTCAAAATAACAAGGGTAATAAATGGCAAG

AAGAATATTCATATCCGCACTAGAAACTCCTTCTTATAATGGAAAGCACTGGAATAAAAA

ACAATAAACACATGGAAGCAATAATCTGACCCATAAAGATCGAATCCAACAACACCTCCC

CTTGCCACAGACAAATAAGCAGAGTGATAAATAATAAAACCACATGAAAGAAAACAATCA

GGAACAGAATGTTCGCTGAGAACTCCCCATCACCAACTTCCACCTCTAAGCAGAAAAAAT

AAAATACACACAAACTACAGATAATATAGACGCCTTCATGTCGAATACCCTGAAAGAAAT

CAGGAGAAAACTCTCCTGCCAGTCCATTGTAAGTCAGTCTGGCTCCCAGATAGATGAGCC

AGTAGACTGGAGGTATAAACAAAAATCCGTACTTTCGAAGAAACAGCATCATATCCATCC

CCTGATTATTTGCTCATAGCGTTCAGTGCGTTAAGTTTTTTTCACGTACTGCTTTAATCT

CTTCTTTATACTTGCATTCTGATGCCATCTTTTTTGCGTCACCGAAAGTTAATGGCTCTG

ACGAAGTGCCTGTGTTAGTTTGAATTGCTAAACGTAACGCCTCACCTGCACAAGGTGTCT

AATGAATAATACTTTGCAGTTGTTCTGGAGTAGCGGGCTGCATATCGCTAGAATCTTCAA

TATACTGCACAAAAAAAATACCCAGTTAACACAATTAAAAGAAGAACTATCAAAAAACCA

AATTGCTGGCCAATTTCTTGCTGTCTTTCCATTGTTCCATCCCTACCGGTCAATCCAGTT

TGTTAATCAGCATTTCATTTTGAGTTAGCTTTATATAATTCCCACTGATGGATATAGGAA

TAATACTGCCCACCAGGCACATTAATGATGATGCCATCACAGTCCAGTTTATTAACAGGG

CTGGTAAAAGCGCCTGTCGGCATGTTTACCTCAAGTGTCCGGCAGTCATCTTTCCAGTGT

CTACCTGCTTCAAGTTCATCCATCGAAAATGAGTGAATGGAGATAACGAACATCCCGGAA

AATCCAACCACCGCTATAAGCGCACAGTATATGAATGTATCGCCTCTGTTAACTCGAAGA

TTGAATTTTTCAGGGATGGCAACCATTGCCAGCGCACCGACCACACCAATAACAAAAAGA

ATCAGGCATATACCGTTAAGCCATGCAACGTTATGTCCAAGTATATAGTACGCTTTCACT

TTCTTATTCCTTATGCTGCATACTTTCAAATAACGTGAGATTGTTAATACTGACCATCGG

TCTTACTATTCACCTGCCCCCATCCGATCAAAGTAATAAATCAAGACATAAAACATATAA

AAAACCACTGTGGCTGTAAAAAATCCCGTTATTACTGACAGCGTCAAATCAGGAGAGCCG

GCCCACATGTTTTTATCCATGAATACCATTAATGAAAATAAAGCACTGAGACCTGTAAGC

CCAAACAACATTAAAATACAGGAAAGCGTATCTCTTATAAAAACACCAATAATTACATAG

CCGTAACCGCAGATAATGATTGCCATTGCAAAAAAAAGTCGAACAAAACCATCAAAACCT

AACTGGTATTCAGCCATTTACCCACCCTCATTCAATGTTTCTATCACGCTGCTCAAAGGC

TCGCGGGTTTTAATTTCAATGCACTCTCCTGTATTACTTCCGTAACCTCTGCCCCCACGT

GCTTCGAGTACCCGTAGCATTTTTATGCAGACATCTGTATTAGGCATGGGAGTAATATCC

CAAATCCCACCGCCACTACTCGGCGTCATCAGCACCAGAAAAATAAAGGCATGCATACTT

TATTGCCTCTGTTTATATATTAACGAATGAATATTTCTTTCATTGCCTCTGCGATAGTTG

TTTGCCTATCGCCACTTATCGCTCTGTCAGAATCAGACTTGCTTACATTTTCAATAACAT

CACTACACTGAAGTCGATTTTGCCTGGAGAGAAAAACCCTTTATCATCAACCCGCCCTTT

TAAATAACCCTTACATAAAGATACATGAGCGTAATATCTTCGTCTGAACACGCTACCGCC

CATCCCTTTCAACGCAGAGGGCACTCGTTATAATTCAGAAATGAAAACTTACTGCAGCGC

CAGTAATGGCGCTGTGAATCAATTAAGGCGAGGTTGTCCCCACGCCGATGGTTTTACGAC

AAAAAGAACCGTTGCCGGCTGGTGATATACATCATCTGAATCCACATACGGCGCTATCCA

CAATGACGTTGTCTCCTCCCCTTTTCTTAATGGCCGGGGATAATTACCTGGCGGTGTTGA

CGGTGACGTAAACGTTGACGCCACTACTGGTAAAGACATTTTCACTACCGGCAAAGACTG

GAGCCTTTTCCCGGTTTCGAAATATATTGCCTCATTCTTTGCCGTTGGATTATTTAGGTA

CACTGCACGTGCTCGTTCTCTCTCCGCTGCCACTCTGGCCCGGTTCAGGTTGGGTTGAGG

CGGCAACGGGTACGGATTAACTGACGTGGTTCCGAAATTACCCTCAGCCAGTTGTGGCAA

CCCGGCCGCAGCCGGCTTTGCATCACTGCGTTCCTCCTTCAGCTTCGCTTTTTCATTTGC

CTGCTCCATCGTCATACAGGTATCCGACGTCGTGGCATTACATTGAAATTCAGTCTCTGT

GCCCGCGCACCCGGTTAAGAGCAAAGCGCTGCCCAGAGGAATTAACAGCATTAATTCCTT

CATAATATTTCTCGCTATTTATCGGTTTTTTTTCAGGTTCATCCTGAGCTGGGTATTTTC

CTTAATCGCCCGAACTAGCCATTATTTTCCCCCTGCGGCGCTGCGCCCGGAGAGAACTCA

CGCGGATCAAGTTTGCCCAGCTTCTTCAGCATCTCGTCAGTATTGAATCCGTTCATACCG

CCGCCTGACTGATGATGTGCATCAGCCTGCTGTGCCGGCTCCGCCTCCTGATTCTGAGCC

TGCTGTTGCCCGTTCTTTTCCGCTTCCAGTTCTTCAATCGTTTTCAGCTGGAATCCATCC

TGGAACACGACGGTCACTTCGTTGCCGGCACCAATCGGAATGACCGGGTGATACTGCTCG

GCCCTTTTGATGTAGTACTCGCTCAGCGTCTGCGCAGCTTTAGATGCACCACCGCCGACC

CCCATTTTCAGAACGTCACCGGCGCCAACAGATGCGGTTGCCCCCAGGCCAACAGCCGGC

TGTGAAGCCCGTTCCATGCCCTGACCAATCCCGTCAACAAAACCGGCCCCCCATGCCCAG

CCGAGGATTTTTCCGTTACGCATCACCACCTCTCCCTTAACCCCGTTTTTCCCCATAAAG

GAAACGTGGCCGTTAATGGGCTGATCGATGGTTTTATCACCTTTGATACAGCTGATATTG

CGGGTACGGACAATGGCGCGTTCGCTGGAGACATCGCCCCAGGCTTCAAGGCCCACAAAA

CACCCTGTCAGGTCGTAGGTTTTGCTGTTTGGCATTTCCACGCGACCGGTGATACGCAAC

TGCATCGGTACAGTTGATTCATTCCCGGTAACAGACGCGTTGGCATCTGCCCCCTCGATA

AGCATGCTTTTTGCAAAGCTCCCCGACGGAATGTACGGCAATGACTTCGTTTTTTTTCCT

TTGTCGTAACTGAACGTTTTACGCTGTATCTGGTTTGGTACCGGTACAGACTGGTAGCTG

ACCTGCGGCGGCGGTGTCATACCATTCCCCGGATAGAATGCCGTCGGAGGCGGTACCGCG

GCGCCGGTTTGCGGCGGATAACTGGCTGGCTGCGGCTCCCCTTCCGGACCGGGTGGCGGT

GACGGAGGAGTCGGCGCGGGCTCGCCACCAGAGACAGCCGGTTTCACGCCCAGCGACTTC

AGCTGATTCTGCATGGCTTCATTGTCACTGCTGAGTTTGTCGATACGTATCTGGTCAGCG

GTTCGCGCCTTACTCAGTAGTTCCACTTCCCCCTGCAGGGAGTCAAAACGCTTGTTGAGA

TCAGCGGCAGTCGCCTGCATTTCTGTTGTCGCGTGCTGCTCCACCTTACTGTTGAAGCTG

CTGTCGACCACCCCGGTCATATCCGGTGCGGGTTCGCCCTGAGCCGGGGCTTCCTCATCA

GAGCTCATGTTCAGATCTGACAGATACAGCCCGCCTCCGACTGCTGCCGCGCCGCCCGCC

AGAATGAGTCCCAGCCAGATATATTGCTTACGTTTGATCAGCGTGTTGAAGTTGGCCATC

AGCGCTTCACTCCTTCATCTGACGTCGTGACCCAGATCTGCATGCGACCACCGGCAGTCA

GCAGGCCCGCCGGGGTACTGAACATGACGGCACGTGTTCCGGGCTGCCAGAAATCGCTTT

CACGCACCATACGGGCCGACAGGGAGACATTGTCCAGACTGTAACGGACAACTTTCAGGT

GATGACCGACCCAGACCCGATCGGCAGTGGCGCGCAGACCAGCCGGCACCTGCAGCACTT

CAGAAGTGACGGGGACAGACTGATACTCATCGGGTACGCTGCCCTGACGCACGGCGCGAT

TCAGCGAAACCAGTAACGATTCATAGGGGTTCGACTCTTCCCAGGCTTTTGCCGGACCGG

GGGTACCCGCCAGCTCGCTGACCAGCTGAATTGTCCGGCCTGAGCCCGCACGGGGCACGG

CACGAATGGAGAAGTTCAGCCCGCGTTCGGTTTCCACAATGAAGGTGAATGGTTTTTTAC

TGACGGTCGCCAGAATGGCACCGCCGCTGTCGGTCTGCTCCTGGTTTGTCAGGCCACCGT

CCAGGCTGTTTATCGCCGTGATGCGATCGCCAGGTACTGTGAACAGATTCGGGTCGGTGT

TACTCACGGCAATATTTGCCTGACCACCATTGGTTAGGGGGACCACTGTCGGCGCCAGCG

TACCGCTGAGGGTCGCGGACATCGCGGGGGCGGCCAACAGCAGACAGCCTGAAATAAATA

ACGGGTTAATTTTTTTCATTATTTATTTCTCCAAAACGTGCCAGCCAGCTGACACCATCG

ACACGACTGAACTGAATGACATAGCTTTTAATTTCACTGTAGGGTTTGGAATCCCCAATC

CACGTTTTCAGCTCACCCCGGATATCCACGCGGTTCTCTGCCGGCCAGGCACGCATCGAC

GTCATATAAAAGGTGGAATTAACGTTATTGTCTTTAATGCGTTTCGCATCTTCAGCCAGC

TGGACCTTGAGGCTGTTCTGCGAGGCGGGTAATACATACCGGAGTAGCTGCTGATGCTGG

GCATCAACCGTTTCCGGCGTGACATTCAGACGCAGGGCAACAAAGGACAGGCCCAGCTGC

TCAATATAAGAGGCGTCAGCCTGGTTCTGAGACACCGCAAAGGGTGCACGGAATAACATC

GGTGTCACCGCCACTTTCTGTTCCGTCTGCAGACGGTAATTATTTATGCCCTGGATAATA

TTGGTCGCAAGACTGAGGGTCAGGAGTGTCCCCAGACTGATAAATCCCACAGCGATAACG

CGGGTGGTATTTTGTCTGGCACCATGTTCCATATGTTATTTCCCCGTTGATTTATTTAAT

CCACTGCCGGAAACAGGAGTCCGGAACATCATGAAAGAAACCTTTAAGAAGGGAGGTTGG

CAGATACCAGTAAATCAGGTCGCGTAGCCAGGAACTGCCCCGCCCTTTTTTCAGTTTCTT

GATACCCCAGAAAACCAGTACCGCTGAAGCTATGCCAAAAATGAACTTGCTGGTCCAGAA

ACCCCAGCCGAGACAAATCACGGCCGGGATAAGTTCATCGAGATATAAGCCAAACCAGCG

GGACTGGTTAGTCAGTGTTTCCGGGAAACGGTATCGCTTTAATTCGTCTCCCGTCATCAC

GTGCTTCCTGTCAGTAACCGGCGACCGACATACCGATGGTGATAAAGGTGGAAATAATCG

CGAAGCCAAACAGGAACTTCACGTTTTTGGTCATCATGTACATGATGCCGCCGGCGACAA

CTTCTGCCAGAACCACCCATTTGACGACGCTGGACTGCTTACCAAACGTGCCTTTAACGG

TCGCATCCCCGGACTTCATCAGGTCGGTTGCCGTGGTGGTGGCCATCGCAGCATCCGGGA

AGAACGCCGCCACAGCAGCAACCGGCAGCGCAACTTTAGCGACTTTCAGGGCTTTCTTTT

TATTGAAAACGCGGGACATAAAAGACGGTTTGGTTTTTTCAGAGACAGCAGAGCCCTGAA

CACTTAATACAGCATTCATATTTATTTCCTTTAAAAAGAATGGTTGATATATAAAACAGA

TTTTTGACTATGATGTTAAATCACTCTTCCTTTTCACCTCCTGGTACGGCTAGTTCCGAG

TTATAAAAGTCCGGAAAACGTTCTAGATGATCTTTCAGTCTCAAATAAGCTTCAGCTGTT

TTACTTCTTCTGCTTCTGTCTTTTGCTTTGATGAGTCGACGATTAGTTTCTTCATCTAAT

TTTAAAAGCACATTTTTTCCAGGCGCAGGTCGTGCGTTGCTCCTAATCGCTCTTTCCAAT

CGACCTCCAAAGTAAGATTACCAACCTTTAATAAATCTTACATTGGAGGATTTAAAAGTA

AACAAACTAAGGAGAAATCTTGAGTAAATTATTTTCACAAATCAAAAGTACCGATGGTAC

TTTTGATTTAACAAAAAATTAACACCGTCTTTTAATATCGAAACCACATTCGATATAAAC

TTTCCATAACTTAGAGTATAGATCGATGACATTATGATATAGTCACGATCATCAAAGCTC

AGTTCCTTTTTTATTTTACTAACTGTATTTTTTGAGGTTTGCACCCCAACACCTGTAATC

TTAGAAATAGATGCATGAGAAAACCCAACCGCATACAGATTAAAGATAGCCCAGTCAGAC

TTTGCTGAACGCTGAATTCTTTCGATATATCTTTGCATCTTTATAGAAAAGTCATTGTAT

TCCATTGAAGGATGAGGTATCGGTTCATCTTCATTTATAAAAACCCATTTACTGTATGTA

TCTTCATTAATCGAGAACGTTTCAATAAAAACAGTCCAAAGTGAACCTGCCAACCAAATA

TTTTTAACAAGTACAGCAGAACCTTCTGAAAACGATTTCAGTTCTGACTGCATCAGTTCC

AGTTTGATCTCCAGGGAGAGATCCAGAAACCAGCTTCCCGGTGCTCTGGGTGTATCAAAT

GCTCCAGTTCCACCAGATGTTAAGAAAATTTTGTCAAAGGTTGGGCTGGTGTGAATTACT

TCGCCCCGGGAATCACGAATAAAAGCAGGGCAAGATGAAATATTAAGCATCTCGCGCATA

GAATGAATGGAATCTGTTTGACTGCGCACAGCAATATGACTACGATCCTTCGCACACATA

GGCGCCTCCTGGAAAGGACACTATGGATAGTTGACGTTCGGGGGGACAAGCCCCGGACGT

CAACGCTTCAACAAATTTTAGTACAACCCTGTAAGTATTCTATATTCCTTATACTTCCAT

GTCACTTTTTAAAGCTAGATCATTATTCTTTTTTTACTGCTGAATTAATTACAAACCACC

ATAAACACACACCAGTTCTTACTCTTCTTCCTGCTCGGGGAAGAAGTGAGAAATAACATC

TTTTGCATCTTCTCGAATGTTACTCACCATGCTGCGGAACTCGAATCGTTCATCACCTGT

AACATGAGGGCTTAGAGAGCCAATAGCCAAAAGTTTGGATACGGTAAACTGAGTCTTCAT

GACATTCTCAAGCAAAATCTTATTAAACTCAGTTTGGTTAAACCCTGAATCTTTTCTTTC

CATTTGAGCCTCATAAACCCTAAGCCCTAATTCAAGGAGCATCGAAGCGACACTTGAAAA

ACTGACATCCTTTTCCTTTGCCCCTTCAGCCCTTCGCTTTTCCACTATTGCATTAATTTT

CTCTGCAACTTCATCACTAGCATAAGCTTGTACCCTGGCCATATCGGTTCCTTTATTAAA

AACAGCATCAAACAAGTTATTATGGCGAGAAGATAACGCGAGTTTACCTTCTTTACAACT

CTAAACTTAAGTCTAGAGTCTAAGAAAGTTGCATTACGAGTCATATGGCGACTTAAGTCT

AGAGTTAAGTCGCTTTAAATATATGATTATAAAAGAGTGAGTCATAAACGAGTCGCTATA

GACTTACCGACGACTTACTACTGACTCACCGGCAACTCACATATATATAAAGAAAAATAA

CATAATGTAATATAACTACAGTTAAGCCACTGAAGCTAAAGTGAAATCTGCAAAATTTTA

ATTTTGCGTAGTGTGTGGTGATTTTGTGGTGAGGAGTGCATATATGTTGAGTCTCGGTCT

TGGATGGGTTAAGGTTATTCCGGGATTTGGCACGGAGGGGAATTCATGAAGGGAGTAGCG

TTTGGTATCATCCTGTCTTTAATACCATTGTCATCAATGGCAGCAGACTGCTTTGATATG

GCTGGCAGGGATTACAAAATTGATCCGGATCTCCTGCGTGCTATATCATGGCAAGAATCA

GGATTTAAAATTGATGCGATTGGGCGTAATCCTGTTACGGGTTATGGATCAGGCTTGATG

CAAATTGACTCGCAGCATTTCAACGAACTGTCGCGATATGGAATAAAACCGGATCATCTT

CTTAGCGATGCTTGTCTTAACATCTACACCGGAGCCTATTATCTGGCTCAGGCGTTTAAA

AAGTGGGGCGTTTCGTGGGATGCAGTCGGGGCATACAATGCAGGCTTCAAAAAGACCCCG

CGCCAGGCAGCAAGACGTTACGAGTATGCGAAGAAGATCCATTACTACTACACGGCTATC

AAAGCAAGCAAACGAACTTCTTCTAAAGATCAGAAAATCGCCATGAACTAAAAAGCCTTC

TGATATAAGAAGGCTTGAATTTCTTAAAAATCTACGGCATCTATACCTGGATAATAATCG

GCATCACTATCAAAATGAAAAAGCAGATACCCACCCTCCCGGTGCATTAGTATAAGAGTT

TTGCGTAAAAATTTTGACACCCCACCTCTTTTTAGCGCCAGAAGATGGCGTTTGAAATCA

TACATCCTTATAACACAACCATAAGGTGTATCATGTATCCACTCTAAGTAACTATCGCAA

GTTAGATAATTGGTTGTTGATGAAAGCACCTGAAGAACTCTGATATCACCTTCTTCCATA

TGTGAAATACTGATACAGACAGCTTTAAATTCAAACATAAGTATTCCCACCATCAAAACG

CCGGACAGCTGCCCGGCGCTTATAATTAGCCTTTAAGAGTGCGGAATTTCTCCGCAATTA

ACCACAATGCCTTATTGAGTTTAACATCACCATCGATTGCTTTTACTGGCCGGGTTGTTG

TTCTTTTCCCTTTTTCAGTTCGGCCAGGCAAACCGCCTTTAATCAGATTTTCCTGGACCC

TTTGATATGTAGTCCAGATGTCATCTTTTTTATCTTCATAACGGCGCGGATGAATTATCT

GTTCAATACTGACCGGAGATTTATTTTCATCTTCATATCGGTAGGTTAATGCAGCTTGTC

CAAACAGACGCTGTTCTTCCTTGGTTAAGGCAATAGACTTCATGACATCAACGCCTTCAG

TTATTTTATCGAAAATTCCCAGAACTTCGTAAGCACCTTCGATAACCCTTCCAACAATAT

CACCTTTATGAGGTACACGAATCTCACCAAACGACGTACCGCACACAAGGCCATTTGTGC

ATACAAAACGGAACATACCCGGGATCATTTGATAACTGGACGATCCATCATGCGAGTTAA

GAAGAATGATTTCGGGTACTTCTGTTCCTTTATTGGCCCCTTCACGGCGAAGTCTTACCA

TATGCTTAGTATGCCCCCGTTTATCCTCATCCCTTACTCGTGACTGACAGGCAAAAAATG

GCTGGAAACCTTCTTCACGTAATTTATCCAGCAGTGTAATGGTTGGAATATAGGTATAGC

GATCACTACGTGAATTATGCTTTTCTTCTGAAAACACAGAAGGTACAACCTTGACTAATT

CATCGTTAGTCAGTGGGCGTTCCTGACGAATGGAATGAGTAAGTCCAAATCGGGATGCTA

AACGCATATTATTCTCCTTCACCTGTTTAATTTTTTAACCATCACCCGTTGAGTTGCCGG

GGCCGCGGTTTTGACTTTGTGCGGGGACCTGCTGAACCTGCCCCCTGGATATAACCTTCA

CCCGTTTGAGAGCCGTTCGCCGCGAGGGCGTAAACGAGCACGGCCCGGTGCAGATGTCCG

GGGGTGAGCGGGAAATTTTTTTCGGTCTAATGAAGCGCAGCGGAATGGCCGGGAAAAATT

TATTGCGAAAGGCTCTGCCGTCCCCTGGACAGCAAGACGGGTTGTGCTTGTCTCAGCCCC

GGCGAATGGACTCAAACGGGTGATACGGGTACCAGGGGAAAGGAGCAGGCACCCGCCGCA

ACGACGAAGAGCGCGGGCGCGAAACGGCGTTGCCCTGCAGAGTGCCGGCAGTCCTTCGCC

GGCACGGTGAAAGCGGCGCGACCGGGACGGTCGCAGCAAGCGCTGCCGTTGACCTTGACT

TCAGACATCAGACACTAGCCGTCAGGCCCGAAACCGCTTGCGGGTTCGGCGGAGCTTACC

GCGTCTTTTCGCGGTTAGCGGAGTGTGGCTCGACGACTGGACAGCGTAGCTGGCCAGGAG

CCGAAGGTGTCCAGTATGGGTGTGCTTTTAAAGCCTTTAAGGGTTAAAAAGAGGCATCAC

AGCAGGGAGAAGAAGAGGAAGCAGACAGACAGCAGGCAGC

>NODE_58_length_2674_cov_37.012341

GCAGCATCGGCGTGTCGGCTGGCGAGAGTAAATCTGCAACAGAAATCATTGCTGTTTCCG

GGGCGCGCTGCTGGGTGGGATTTGCTCCTTCGCGTGGCGTAGATAGTTCTGCTGTGTACG

AGGTGCGTGTATGAGTCATGACGATATGAGCAACTCTAGCGGCTTTAACGAGGCCGCTGC

ATCATTTTCATGGAACGGCCCGAAAAAGGCCATTAATCCTTATCTGGACCCGGCGGAAGT

TGCGCCGGAGTCTGCACTTTCAAACCTGATCACTCTGTATGCTGCCGATAACGAGCAGGA

ACAACTGCGCCGCGAGGCACTGAGTGAGCAGGTCTGGGAGCGTTATTTCTTTAATGAATC

CCGTGATCCTGTCCAGCGCGAAATGGAGCAGGATAAGCTCATTAGCCGGGTAAAGCTGGC

GCATGAGCAGCAGCGTTTTAATCCAGACATGGTCATTCTGGCTGACGTCAACGCCCAGCC

TTCCCATATCAGCAAGCCGCTGATGCAACGTATTGAATACTTCAGCAGCCTGGGCAGGCC

AAAGGCTTATTCCCGCTATTTGCGTGAGACGATTAAGCCATGTCTGGAACGACTGGAGCA

TGTACGCGACAGTCAGCTATCCACTTCTTTTCGCTTTATGGCAAGCCATGAAGGGCTGGA

CGGCCTGCTGATCCTGCCTGAAATGAGTCAGGATCAGGTGAAACGCCTGTCTACCCTTGT

CGCTGCGCATATGAGCATGTGTCTTGATGCCGCTTGTGGTGATTTGTACGCCACCGATGA

TGTTAAGCCAGAAGAAATCCGCAAGACATGGGAAAAGGTGGCAGCGGAAACCCTACGTTT

GGATGTCATCCCGCCTGCGTTTGAGCAACTCCGTCGGAAAAGAAACCGCCGTAAACCAGT

GCCCTATGAACTCATTCCGGGCTCGCTGGCGCGTATGCTGTGCGCCGACTGGTGGTATCG

GAAATTGTGGAAGATGCGTTGTGAATGGCGGGAAGAGCAGTTGCGTGCTGTCTGCCTGGT

CAGCAAAAAAGCATCTCCCTATGTCAGCTATGAAGCTGTGATGCATAAACGTGAGCAGCG

CCGTAAGTCGCTGGAGTTTTTCCGTTCTCATGAACTGGTGAACGAAGACGGCGACACGCT

GGACATGGAAGATGTGGTAAACGCCAGCTGCAGCAACCCGGCGCATCGCCGCAATGAGAT

GATGGCCTGTGTTAAAGGTCTGGAGCTTATCGCGGAAATGCGCGGTGACTGCGCCGTTTT

CTACACCATTACCTGTCCGTCACGTTTCCATTCCACGCTCAATAACGGCAGACCCAATCC

GACCTGGAAAAACGCGACGGTAAGACAAAGCAGCGATTATCTGGTCGATATGTTTGCTGC

ATTTCGTAAGGCGATGCACAAAGCCGGGTTGCGCTGGTATGGCGTGCGGGTGGCTGAGCC

GCATCACGACGGCACAGTTCACTGGCACCTGTTGTGTTTCATGCGCAAAAAAGACCGCCG

CGCCATTACTGCATTGTTGCGTAAGTTTGCTATCCGTGAAGACCGCGAGGAGCTGGGCAA

TAACACGGGGCCGCGCTTTAAGTCTGAGCTGATTAACCCGCGCAAAGGAACGCCGACAAG

CTACATAGCGAAATACATCAGTAAGAACATTGACGGGCGTGGTCTGGCTGGCGAGATCAG

CAAGGAAACGGGTAAATCTCTTCGTGATAACGCTGAATACGTGAATGCCTGGGCGTCTTT

GCATCGTGTTCAGCAATTCCGCTTCTTTGGTATTCCGGGGCGTCAGGCTTACCGTGAACT

GCGATTGCTGGCTGGTCAGGCGGCAAGGCAGCAGGGTGACAAAAAAGCAGGTGTGCCGGT

ACTGGATAACCCGCGCCTTGATGCCATTCTGGCTGCTGCTGATGCTGGTTGTTTTGCCAC

CTATATCATGAAGCAGGGAGGTGTACTGGTTCCCCGTAAATATCACCTCATCAGAACTGC

TTATGAAATTAACGAAGAGCCGACCGCCTATGGCGATCACGGTATTCGTATTTATGGCAT

CTGGTCACCCATTGCAGAGGGCAAGATCTGCACTCATGCAGTGAAGTGGAAAATGGTTCG

TAAGGCCGTTGACGTTCAGGAGGCGGCAGCCGACCAGGGCGCTTGCGCCCCTTGGACTCG

TGGCAATAACTGTCCCCTTGCTGAAAATTTGAACCAACAAGGGAAAGACAAATCAGCTGA

TGGGGATACCAGGACGGACATTACCCGCATGGATGACAAGGAGTTGCACGATTACCTGCA

CAGTATGAGCAAAAAAGAGCGCCGGGAACTGGCTGCAAGGTTACGCCTGGTGAAACCGAA

ACGGCGTAAAGACTACAAACAGCGAATTACAGACCATCAGCGACAGCAGCTCGTCTATGA

ACTGAAGTCCAGAGGATTTGATGGCAGCGAGAAAGAGGTCGATTTACTCCTTCGCGGCGG

CAGTATTCCATCAGGAGCAGGCCTGCGTATCTTCTATCGGAACCAGCGTTTGCAGGAAGA

TGATAAGTGGCGAAACCTGTATTAATTACGCGGGTTAACAATTCGTGCTCTTAATAATAC

CAGGCATATCAGGCTGATGAACGTAAAAAAACGTTTTACATCAGTAATATTATTATATAC

TGTAAATATAAACAGTGTGCGCCGGGAGACCGGTTAGAGATCAAGGGGTGAAAGTCCCCG

ACCATTGAAGGACCAGCAATCCACAAGGTCCCCGAGTCATGCGTTGCATACCGCGAGG

>NODE_61_length_4674_cov_36.349380

GCTCAATGGATGTCATCAGCTGAGGTGACTTTTATGCGCATTGAAATAATGATCGATAAA

GAGCAGAAGATTAGCCAGTCTACCCTGGACGCCCTTGAATCCGAGCTTTACCGCAATCTG

CGCCCCCTGTATCCCAAAACGGTAATCCGTATCCGTAAAGGTAGCTCTAACGGTGTGGAA

CTGACCGGACTGCAACTGGACGAAGAAAGAAAACAAGTGATGAAAATTATGCAGAAGGTG

TGGGAAGACGACAGCTGGCTGCATTGATTTTGTCAATAGACGCTTGTTTTTTCTAATCAA

AAAGGGTTACATATGAGTGAGAGGCGATGATCAATCAGATATCGCCTTGTTTTTTGTCAA

GAAAAGAATAATAGGCTAAAAATGAAAATTAATAATGTAGCGTTACCAATATCTCTTGCT

GTAATCCTAACTGGTTGCGTACCACATGCTTCTAACCGAAATATCACTGCTATTGAAGTG

GTGAAGCCTGCTATTGGGCAAAGTGCTACCGCCTACATGGGCGATCCCATTATCACATCT

GCTACTGGATTTAAAACGGACGTATTAGAACTTGGTGCGGCTAATGGTGCATTGTCTTCT

ATCGCTGCTGGTACATATTGCAGTGAGGGGAATGGAATTTATCGCAATTATCATAACCCT

CAAGCTGTTGCGTTAAAAAATCTCTATGGGCAAATCGGTAACTATGTTGATTATGTTAGT

TACGATGCTGCAAAAAATGAGATATCACCGCCAAATGGCACTTCTTATACTGCATCAGAA

ATTTCTATCAAACGTGTTCCTGATGGGCTGTGTCGAGTGAGTAACTCATTGGTTAAGACT

ATCGAATACAATGGAAATGCAGGCGGTGTAATGAAGTTCACCTATCGTGAATTTGCAAAC

GATATGGCTCGTGCAGCATTTACAACAGATTTTTCTGTAGATTCTAAAGGAAGTGATGTT

ATCGCTTACAAAGGTGCCAAGTTCAAAGTGAACAAGGCTGATAACTCGTCTATTTCTTAT

ACCATTATTTCTGGCTTTGACAAGGCTGTCACGTTCTAGGTTTCACGCTTACTGAGTATG

TTACGATTTTGCACATTCTGCATAAACGCGCATGTCTATGCTGCATGAGATCGCATGATC

GTTTGAGGATCTTTTGTGTTAAGGCCCGCCAGTTCTAGCGGGCTTTTGCGTAGATCATGC

AGGTGCATGAAAACCACTACATAAAGTGGGCAGGCGTGGCGGGGATACGAGCGCGCGCTG

GAGGGATAAATGGAATTGAAAATGTACCTTCTTAGAGATAACCTTCGCTAAAACTTTATT

ACTAAGGAGTGATAATGAGTACCTGGAACCAAGCCTATTCTGCAAGAGAAGATTTGAAAT

CGTATGGTGATAATGGACTGGCTTTGTTTGCGTTAGCATTACATTTCAGAATTGATGATA

TTGATAGTGTCGCAGCAGAGTCCATTACCGATGGACATGACGATAAGAAATGTGACCTTG

TGTATATTAATGAAGAAGAAGAATTTGCTGTACTTGCTCAATGCTATTTCTCAAGCAAAG

ATAGACAGGAAGCTCCAGCAAATAAAGCGAGTGATCTTAATATTGCTTTAGCATGGCTTC

TGCAAAGAGATTTGCATGATGTACCCGATAGAATAAAATCTTCTGCTCAACAGATACGGA

CATCAATCAAACAAGGGAAAATTAAAACTCTGTACGTTTGGTATGTTCATAACTTACCAT

CTTCAACAAATGTGGCTCAAGAGCTAATTACGGTTCAGCAGACAGCAGCAACTATTTTAA

AACATGATTTTGAAGATGCTAAAATACAAGTGCATGCAATGGAAGTAGGCACTGAAAAGT

TGACGGAATGGTATAGTGAATCACTATCACCAATACTGGTTGATGAGATTTTCAATATTA

AAGTCAGTGATGGTGGCTATGAAATAAAAGGAGATAATTGGAATGCATTCTGTACTACCA

TTCAGGGAAGAGATTTAGCTAGAGCGTACAAAAAGCATAAATTAAAAATATTTTCAGCAA

ATGTTAGAGACTACCTTGGATCAAGGTCATCTGATTCAAATATCAATAATGGTATCCGTA

ACAGTGCGGAAAATTCAGCATCAGAATTTTGGGCATACAATAATGGCGTAACTGTTTTGG

TTCATGAATATAAATTCAATGAAGCATCAAAGAATCTTGAAATCAGAGGGATGTCAATAG

TTAATGGAGCACAGACAACAGGTGCTTTAGGAACGCTGCCACGATTACCTCCAGAATCAG

TTAAAGTCCAAGCTAGATTTATAAAAGTCAAAGATGCGGATGCTGATCTAATTCAGAATA

TAATTCAGTATAATAACAGTCAGAATAAAGTTGAAGCATCTGATTTCAGAAGCACAGACA

AAATTCAAAAACGACTTAAAAATGAATTTGCTTCTATTCCTGATGCTGAATATGATGGAG

GAAGACGAGGAGGTGCTGAAAGTGTCATTCGTCGAAAAACTAATCTACTGCCTTCTTATA

CTGTTGGTCAAGCTTTGATGAGTTTCCATGGAGAGCCGACGATAGCTTATAATCAGCGAT

CTGCAATTTGGACTAATGACTCTCATTATTCTAAGATTTTTAATGACAGTACAAAAGCTT

CACATATTGTTTGTGCGTATTCTCTCATGCGGTGTATTGAGAACAAGAAAATAGCTTTGG

CAAAGAAAGATACTCTTTCAAAAAATGATAGCGCTCAATTGGGATATCTCAGGCATCGTG

GTTCAATACCTTTATTGTGCTCGGCTATTGCCGAATGTTTGGAAAACTTTTTGGGCCGTC

CCGTTCCTAATTTATTTAGAGTTTCGTTTGGAAGTACGGTCTCTCCTTCTCAGGCTGAAA

GTATTTGGGAGCCAATTGTAGATGTGTGTCTGGCTTTAAGTAATCAGTTGCTGCCTGCAC

TGGTTGAAGGAGGGTTGAAAAGTCCTACAAAAGTTAAAGATTGTATATCAAATTTTTCAC

AGCTTATTACTGCAACGGCCCAAATGAACCAGCCTGTATATGAGGCATTTGAGAAAAAAA

TCAAATCCGCATTCTAACTAAAAGAAGGCCTTGTAAGAGGCCTTCTTGATATTTTACTGA

TCAGCGAACATATTGTCGTCATAATGAGTATGTCGCAAAACGAATAATTTCATCTTTCAA

CCATCTATTTAGTTCCTGTAGCCGTTTCTGTAGCGGCATTAATTCGTTACGAACAAAAAC

GCAACTGGCTTTCTCTACATCCCCAAACCCTCCAACATTATTAGGCATAATCCCCATCAT

TTGCGGCGGCACGCGGTGCGCAGCCATCATGTCGTCGCGGCTGACATTTTTGATATTCAG

AAATTCATCCTTCGCCGCGACTTCTGATAACGGGATGATTTGAAGCCCGTCTTTTTTACC

GTTAGGCGAGTACATAAACAGGTTACGGAAGTTACCAGGACCTTTGGCACTTTTCATCGC

GTTGCGGAGATTGTTCACATCCTCCTGATTCTGCGCGGCATCGGTCATATACATGATGAA

GCCTGCATGGCTGCCGTTGATGTAATACTTGCGGCGGAACAGCGTGGCGGACTCGTTGAG

CAAAGCGGATGGGATGGCAGAAAGATAACCGGGCAGGCCGTAGATCTCCTGGTTGATGTC

CGGTTCCATCAGATGAAAAATGCTGCCTTTCGTGAACTGATACGGCTGGGTTGTCATACC

ATATTGCACAAACCAGTAAGTATCCATGTCTAATCCGCGTCGGGTGTATTTTGCCAGAGC

AGGCTCAAGGGCGATAACTTCACCGAAGCGGTTAGTGCGTTTCTCCAGGTAGGCGTTACC

AAAAACCAGATAGTCCTGCACAAAACGTGAAAAAGCCTGCTGGCTGAGCAGCGGGTGAGG

GATATAGGTGCTGGTCAGAATATTGCACTTTACTGCAATCGGTGAGCTGTGATGCACGGC

GGCGCGGAAGGTTCGCGCCAGTCCGTCAAAACTCACTGGCGGCTCATACCAGCGATCTGT

CTGTACGCATTCCACATAGTCCAGTAGTTCGCGGCGATCCAGAACTGGAATGGGATCGCC

GAAGCTGAATGCTTCGGCTGAAGTCTGGCTTTTATGCTGGGTCTGGTTCTGCGACGCAGC

GCGGTTCTTCTTACTCTTTCCCATCAAAAAATCTCCACAATATTACTGGTATTGGCGGAC

TCGCCCTGCAGTGGTTCGTTAAACAGTGCGTGCATTGTTGCCCACGCCAGATCGGCGTGG

CTGGTTTCTTCGCTGCGGCTGGCTTCATACGTCGGGCGGTTGCCACTGGCGGTGGTGGCG

CGACGGATTGCCATGAATGACTGCGCAATGTCGGTGTGCCCGGCGTCAAACTCCAGACGG

CGGTGGCTGATAATGTCGTAGGCCTTGAGTACCAGAGCGTTTTTAACGTTGGGGTTGTAG

ACAAACTCCCGGACGGCAGGAAAAAACGCTTTCACGTTCTCGTAAACCCCGTGACCGACG

CCGGTTGAGTCGATACCGATGTATGTCACGTTGTACTGTTCAGTCAGTTTTTTGATGGCG

TCAGCCTGGGCGCGGAAGTCCATCCCGCGCCACTGGTGACGCTCAAGAATGCGGAACTTA

CCGCCCGGCACGGCTGGCGGTGCCACCACCACGCACCCGGCGCTGTCGCCGTTTTGCGTA

CCTTTTGCCGGGTCATAACCGATCCACACTTCGCGCCAGCCAAACGGGCGCAGGGCCAGT

GCATGAAAGTCGGTCCAG

>NODE_64_length_11698_cov_59.733204

GTGTGGTGTTCATGGCACAAACCTACAGCCTTGAATGAAGGCTTTCCCCGCCTGCGGTTT

GTGTGGTTGTCGGTACAAATACCGTGCATTGTTTCACTGCCCTCATCACCGCAACCATAA

GGCTCCAGTAAGTTTTTTCTAACGGAGCACGGCTCATGACAGTGAAAGCAAAGCGTTTTC

GCATCGGGGTGGAAGGTGCCACCACCGACGGACGCGAAATCCAGCGTGAATGGCTGGAAC

AGATGGCAGCCAGCTACAACCCGGCGGTGTATACCGCGCTGATTAACCTTGAGCACATCA

AGTCTTATCTGCCGGACAGCACCTTTAACCGCTACGGCAAGGTGACGGCGCTGTTTGCTG

AAGAAATCACGGAAGGTCCGCTGGCAGGCAAGATGGCGCTGTATGCCGACGTTGAGCCAA

CGGAGTCCCTGGTGGAACTGGTGAAAAAAGGCCAGAAATTATTCACCTCTATGGAAGTCA

GCCCGAAGTTCGCTGATACGGGCAAAGCCTACCTGGTCGGCCTGGCTGCCACTGATGACC

CTGCCAGTCTGGGTACGGAAATGCTGACATTCAGCGCCAGTGCAGCCCATAACCCGCTGG

CAAACCGCAAGCAGAATCCTGCCAATCTCTTTACCGCTGCAGAGGAAACGGTGATCGAAC

TGGAAGAAATCCAGGACGACAAACCGTCCCTGTTTGCCCGCGTCACGGCGCTGTTTACCA

AAAAAGAGCAGTCCGATGACGCCCGGTTCTCTGATGTGCATAAGGCCGTGGAGCTGGTCG

CCACTGAGCAGCAAAACCTGAGCGCACGCACCGAAAAATCCCTGTCTGAGCAGGAAGAAC

GCCTGTCTGAGCTGGAGACTGCCCTGCAGGCACAGCAAACCGCCTTTAACGAACTGGTGG

ACAAGCTGAGTCATGAAGACAGCCGCCAGGACTACCGCCAGCGTGCAACAGGCGGTAACG

CCCCCGCTGACACTCTGACCAATTGCTGATGGAGCACAAAACCCGATGAAGAAGAATACC

CGCTTTGCTTTTAACGCTTACCTGCAGCAGCTGGCGCGTCTGAACGGTGTGGCAGTTGAA

GAACTGTCCAGCAAGTTCACCGTGGAGCCGTCTGTACAGCAGACGCTGGAAGACCAGATC

CAGCAGTCCGCCGCTTTCCTGACGCTGATTAACGTCACGCCAGTGACTGAGCAGTCCGGT

CAGCTGCTGGGGCTGGGGGTTGGCAGCACCATTGCCGGAACCACTGACACCACCGCGAAA

GAGCGTGAACCTGTCGATCCGACGCTGATGGTCGATGTGGAATACAAATGCGAACAGACC

AACTTTGACACGGTGCTGACCTACGCGAAGCTGGACCTGTGGGCGAAGTTTCAGGATTTC

CAGGTGCGTATCCGTAACGCCATCGTGAAACGTCAGGCACTGGACCGCATCATGATCGGC

TTTAACGGCGTGAAGCGTGCGAAAACCTCCAACCGTAGCGAAAACCCGCTGCTGCAGGAT

GTGAACAAAGGCTGGCTGCAGAAAATCCGTGAGGATGCACCGGAGCACGTCATGGGCAGC

ACCACCACGGGCGGTGAAACCACACCGGGTGCGGTGAAAGTCGGTAAAGGTGGCGAATAT

GCCAACCTGGACGCCGTGGTGATGGATGCCGTTAATGAGCTTATCGACGTGGTCTACCAG

GACGATGACGATCTGGTGGTGATTTGCGGTCGTGAACTGCTGTCTGACAAGTATTTCCCG

CTGGTCAACAAAGAGCAGGAAAACAGTGAAAAACTGGCAGCCGATATGATTATCAGTCAG

AAACGCATGGGCGGTCTGCAGGCCGTGCGTGCGCCGTTCTTCCCGCCGAATGCGCTGCTG

ATCACCCGTCTGGATAACCTGTCCATCTACTGGCAGGAAGACACCCGCCGCCGTTCAGTT

ATCGACAACCCGAAACGTGACCGGATTGAAAACTTTGAATCTGTTAACGAAGCCTATGTG

GTTGAGGACTACCGCTGCGCCGCACTGGTGGAAAACATCCAGATTGGCGATTTCAGCGCC

GCCGCAGCAGAAGCCGGAGCGTAACCTATGAGCCTGAGTCCCGCACGGCAGCATCGCCTG

CGCGTTCAGGCTGAACAGGCCGCCCGTGAAGGCGGCAGTGTTCGCCACGCGTCGGGCTAT

GACCTGATGCTGCTGCAACTGGCGGAAGACCGCCGCCGTCTCAAGGGCGTTCAGTCCACG

GTGAAAAAAGCGGAAATAAAGGTGGAGCTGCTGCCGAAATATGCCGCCTGGGCGGAGGGC

GTCCTGGCTGCCGGAGGCGCTCAACAGGATGACGTGCTGATGTACGTGATGCTGTGGCGC

ATTGATGCCGGAGATTATGCCGGGGCGCTGGAGATCGGGCGTCATGCCCTGCGTCATGGC

TGGGTGATGCCTCTGGGTAACCGCAACGTGCAGACCGTGCTGGCAGAGGAAATGGCAGAT

GCAGCGCAGAGCGCAATGCTTGCCGCTACCGGCTTTGATGCCGATCTGTTGCTGCAGACG

CTGGAGCTGACAGACGGTCTGGATATGCCGGACCAGTCACGGGCGCGTCTGCATAAAGCG

ATTGGCGCTGTCCTGAGTGAAAGCAATCCGGCTTCCGCCCTTAATCATCTCAACCATGCG

TTACAGCTCGATCCCCGCTGTGGCGTGAAAAAAGACAAACAGCAGCTGGAGCGCAGACTG

CGCAATGACAGCCGCTGACAGAACGTGCCCCCGCGCACGGGCGGCACGGGGTGGCGAAAG

GCATAGCCACATCAAAATCCCGTCCACCGCCCTCTATTTCAGGAGAAAGCAGCATGAAGT

TTGTTGCGCCAGAACAGGCACCGGAACAGGCGGAAATCATCAGAAATACGCCGTTCTGGC

CTGATGTGGACCTGTCGGAGTTTCGCAGCGTGATGCGCACTGACGGCACGGTGACGCAGC

CGCGTTTAAAGCAGGTTGCCCTGTCGGCAATTTCGGAGGTCAACGCAGAGCTGTATGAGT

TTCGCAGACGTCAGCAGATGCTGGGATATGCCTCGCTGGCAGAGGTTCCGGCGGAACAGC

TGGACGGCAAAAGTGAGCGCATTCAGCACTATTTCAACGCGGTTTACTGCTGGGCACGCG

CCATGCTCAACGAACGATACCAGGACTATGACGCCACGGCATCCGGTGTGAAGCGGGGCG

AAGAACTGGCAGAAGCCAGCGGTGATTTGTGGCGTGACGCCCGCTGGGCCATCAGCCGGG

TACAGGATGCGCCGCACTGCACAGTGGAGCTTATCTGATGAAAGTGCGTGCGCATCAGTA

TGACACGGTGGACGCGCTTTGCTGGCGTCATTACGGGCGCACGCAGGGTGTCACGGAGCA

GGTACTGAAGGCAAATCCGGGGCTTGCCGAATACGGCCCCTTTTTACCTCACGGGCTGCA

GGTGGAGCTGCCGGACATTCCGACCACCGCCACCGTGCAGACCGTCCAGCTATGGGACTG

AATTATGACGCTTGAGCGAATCAGCGCCTTTATCACGTATTGCATCGCCGTCGTGCTGGC

CTGGCTGGGCGATTTGTCCATCAAGGATGCCTCAACGCTGGGCGGCCTGATGATTGGTGT

GCTGATGCTGGCTATCAACTGGTACTACAAACACAAAGCCTACCAGCTTCTGCGCGACGG

GCAGATCTCGCGGGAGGACTATGAATCCATCAATCGTTAAACGCTGCCTTGTCGGGGCCG

TGCTGGCTATTGCTGCCACGCTGCCGGGTTTTCAGCAGCTTCACACCTCCGTGGAGGGGC

TGAAACTGATTGCCGATTACGAAGGTTGTCGTCTGCAGCCGTATCAGTGCAGCGCGGGTG

TCTGGACCGACGGCATTGGTAATACATCTGGCGTCATTCCAGGCAAAACCATTACGGAAC

GACAGGCAGCGGAAGGACTGATCTCCAACGTGCTGCGTGTGGAGCGGTCACTGGAAAGGT

GTGTGAAGCAACAGCCACCGCAGAAGGTGTATGACGCGGTGGTGTCATTTGCCTTCAACG

TGGGAACGGGCAATGCCTGCAGCTCCACGCTGGTGAAATTGCTCAATCAGCGGCGCTGGG

CGGATGCGTGCCGACAGTTGCCGCGCTGGGTTTATGTAAAAGGTGTGTTTAATCAGGGGC

TGGATAACCGCCGTGCGCGGGAGATGGCCTGGTGTTTACAGGGAGCAAACTGAAATGAAA

AAGAAATTAATCAGCGGACTGTTTCTGATGTTATGGATGGCGCTGTTAATCGCAGCAATG

GTGTATCCGCAGGGGATTTTTCCGGTACTGGCAGCGTCCGGCGTTTGGGTAGCCTGTTTG

CTGACATGGGCGGTAATTCCGGTAGCACTGGCTGCGTTAATTAAGAATGGCCCGCTCTGG

CAGGAGTTAAGGGCATCTTTGCTGAAGACAATTACCCGAAAAGAAAACGTATTTACCAGT

TGGGTGATGCGATTGCTGATTGTTGTAAGTCTCGCCTGGACGGGGTGGGCTATTACCCTG

GTCTTTTATCTACTGACCGTTATTGCCTTCTGGATCACCCGTAATCAGATGGCGCAACAG

GTAGCAGCATGAACCGGTTGCTGCTGGTTGTGCTGACGTTATTACTGGCGGCGCTGGGCT

GGCAGACGTGGCGGCTGGCTGATGCCAGCCAGACCATCAGCACGCAGGCAGACGAGCTGC

AGAGCAAAAGCCAGGCACTGGCAAAGAGCAACAGCCAGCTTATCAGCCTGTCCATTCTGA

CTGAAACCAATAACCGGGAGCAGGTGCGGCTCTATGCCGAAGCAGAACAGACCAGCACGC

TGCTGAGACAACGACAACACCGGATCGAGGAACTGAAACGTGAGAACGAGGATTTACGCC

GCTGGGCTGATACTCCTTTGCCTGCTGACATTATCCGGCTGCGGAAACGTCCGGCACTCA

CCGGAGGTATGGCTTACCGTCAGTGGTTGTCCGCGAGTGACGCCGTGTCGGCTGGATCAG

GCAACGCCGCGCACTAACGGTGATCTGAACGCGTTGCTGGATGAAACGGAGGCCGCCTGG

GCGGTCTGTGCAGACAAAGTGGACATGATTATTGCGTGTCAGGAGCGAAACAGTGAACAA

ACCACAATCCCTGCGCCACGCCCTCAATAAAGCGGTGCCTTATGTCCGCAATAACCCGGA

CAAACTGCATCTGTTTGTGGATAACGGTTCGCTGGTTGCCACGGGGGCCAGCTCCATGTC

GTGGGAGTACCGTTACACACTGAACGCGGTGATTGAGGATTTCAGCGGCGACCAGAATCT

GCTGATGGCCCCGGTTTTGCTGTGGCTGAGGGATAACCAGCCCGATGCCATCAATAACCC

GGCGTTACGGGAAAAGCTATTCACCTTTGAGGTGGATATTCTGCGCAACGATGTCTGTGA

TATCAGCCTGAACCTGCAACTGACGGAGCGTGTGCTGGTCAGCACTGACGGCAGTGTGTC

GAGCGTTGAAGCTATAGCGGAACCTGATGCACCTGAAGAAATGTGGACGGTGAAACGTGG

CTGAACTGCAGAAGGTGGACGACTGGCTGAGTGCCTTGCTGGCGAATCTGGAACCAGCCA

CGAGAAGCAGCATGATGCGCCAGCTGGCGCAGGAACTTCGCCGGACACAGCAGCAGAACA

TCAGGATGCAGCGTAATCCTGATGGCAGCAGCTATGAACCGCGAAGGGTAACAGCACGCA

GTAAAAAGGGGCGCATCAAACGTCAGATGTTTACAAAGCTTCGCACCACAAAATACCTGA

AAACTGCCGCCAGCGCCGATTCTGCCAGCGTGCAGTTTGAAGGTAAGGTACAGCGCATTG

CCCGTGTTCATCACTACGGCCTGCGTGATCGCGTCAGTCGTAATGGTCCGCGAGTACACT

ATGCAGAGAGACGGCTGTTAGGGATAAATGCTGAAGTAATTAAGCTCATTCAAGATATGA

TATTTAGAGTCGTTACAAATTAACACTTCGAAGCTAGTAAAAATTAGAGTGACATAATTG

CCACTCTAATTAATGCGTTTAAATTTCGGATTTGGTTTCAAGGTTTCTCAATGTATTCGG

TATCAATGTTTCACTGAATCCAGAAAGCGCACAAATCACATAAATGGAGAATGAGATGTC

ACTACTATTATTCATAAACCCGAAGATAATATTCCCCTTGAGCATAAAGTATACAAGTAC

GCCAGCCATCATTGAAAGGAGTATTCTCTCCGCACCATAGAAGAAATAAGTTTTCTTTTT

TAGTTCTCTGTCTGTATGGAGGCTTTTTATTTTTAGGGATACAGAAATAAACCCCCCGAT

GGAAGCAAAGGAAGCGGCGTATAACACCACTGGAATAAAGTGATTAGCTTTTATGAAATT

AGAATCTCTAGCCAAATATGTTATCAATGCAAGGATGATGAATATCAATGCTAAAGTTAT

GGCTCCTGATTGATATAAATTCCTTCCAAGCATTGTGTTTTCATAATCGTTTTTAATGTC

TCTATTTATTGCGGCGAAGTTATTTTTGTTTATATCATTTTTTCCAAGTATTGTTGCTGA

CATAACTGTTGCTGCTCTTTTTTTATAAATAGAAGAGCAGTTGTATTTGTAGCAATGTGA

AATAAACTCATCAAAGTGCTCTTTTGAAGCATGATATCTATCAATCTTACTGTCATCCTC

CTCAATGATTGAGTCTATGAACACGAGCATAGACTCATGAGGCGGAAGATTGGCTACTTC

ATAAATGACATATTCATCCCCACGTGAATAAATTTTACTTATGGTGTTTCCACCCAAATC

TGTTCCACCAACGACGTATTTGCCAATTCTTTCTTGCTGTTTTTTTTTGTATTCATCCCT

CTCCTTCTTTGTAGGTGGGGGATTGATGGGATCATTCATTGCATCCATGGGGACAATATT

ATCTTGCTCAGCTGCTTCTGGGGTATTGGTGTTAGTTGTCATTTTTTGTGTAGTTAATGT

CACAAGGAAAGTGGATATAAATATACAAATAGTACAAATAAAATCAACTTATGAACGCAC

AACTGACTGAAATCATGCGCCTTATCACCAATCTGATCCGCACTGGTGTAGTCACCGAAG

TGGACCGGGAGAACTGGCTTTGCCGGGTGAAAACGGGCGACCTTGAAACTAACTGGATCA

GTTGGCTGACGCTGCGTGCCGGTAATGCCCGCACATGGTGGCGACCATCGGAAGGTGAGC

AGGTGGTGCTGCTGAGTCTGGGCGGTAATCTGGAGACTGCCTTTGCGCTGCCCGCTGTCT

ATTCGAATCAGTTCGCACCACCGTCGACGTCGGCGGACGCCTGCGTGACAGAACATCCTG

ACGGTAGCTGGTTTGAATACGAACCCGCCACCGGGCGCTGGTATGTAAGGGGCATCAAAT

CAATGGTCATTGAGGCCGCTGACAATATCACCATGAAAACCAGTGAGTTTGTGCTGGAGG

CTGACCGCACGCGAATTAACAGCGAAGTAGTGATCAATGGTGGCGTTACCCAGGGCGGCG

GTGCGATGAGTTCTAACGGGATTGTGGTTGATGCGCATCAGCATACTGGCGTCCTGAAAG

GCGGCGATACAACCGGAGGCCCGGTATGACGCTTTATAGCGGGATGAACAATACCAGCGG

CAAAGTCATTACTGATATTGATCATCTGCGCCAGTCGGTGCGGGACATTCTGCTGACACC

GCAGGGTAGCCGCATTGCCCGCCGGGAATATGGTTCCCTCCTGTCGGTTTTAATAGATCA

GCCACAAAATCCGGCATTACGCCTGCAGGTCATGTCGGCAGTGTATGTGGCGCTGAGTCG

CTGGGAGCCACGGCTGACGCTGGATTCCATCACCATCAACAGCAACTTTGACGGTTCTAT

GGTGGTGGAGCTGACCGGGCGGCGGAATAACGGTGTGCCTGTTTCCCTTTCCGTATCAAC

AGGAGCAGAGAATGGCAGTGATTGACCTTTCGCAGTTACCTGCGCCGCAGATTGTGGATG

TGCCGGACTTTGAGACGTTGCTTGCCGAACGCAAGGCAGAATTTGTGGCGCTTCATCCGA

AAGATGAGCAGGAAGCAGTGAGCCGCACACTGGAACTGGAATCTGAACCCGTCACCAAAT

TGTTGCAGGAAAACGCTTATCGTGAGTTGCTTCTGCGCCAGCGCATTAACGAAGCCGCGC

AGGCGGTGATGGCGGCTTATGCCATAGGGAGCGATCTGGACCAGCTCGCTGCCAACTACA

ACGTGAAACGCCTGACGGTGACACCTGCTGATTATGACGCTGTGCCGCCCGTTGCGGCTG

TGATGGAAAGTGATGAAGCGTTACGCCTGCGTGTGCCTGCAGCCTTTGAAGGGCTTTCAG

TTGCGGGGCCAACTGCAGCTTATGAATTTCATGCCCGAAGCGCCGACGGTCGGGTGGCGG

ATGCCAGTGCAACCAGCCCGGCACCTGCAGAGGTGGTGCTGACTGTCCTTAGCCGCGAAG

GAGACGGAACAGCAGAAAAAGACCTGTTGGATGTGGTGGAGAAAGCACTGAACAGTGAGA

ACGTCCGCCCGGTGGCTGACCGTCTGACGGTTCGCAGTGCAGAAATCATCCCGTACCGCG

TGGAAGCCACCATTTTTCTCTATCCGGGACCAGAAGCAGAGCCGGTAATGGCAGCGGCAA

AAGCCAGCCTGCAGAAGTACATCGCCAGTCAGACGCGGCTTGGTCGGGATATTCGCCGTA

GCGCCATCTTTGCCGCGTTGCATGTTGAAGGTGTGCAGCGTGTGGAACTGGCTTCGCCGC

TGGCGGATGTGGTCCTGAACAAAACGCAGGCGGCATCATGTACGCAGTGGAGCGTAACCA

ACGGGGGAACTGATGAATAGTCTGCTGCCACCGGGTTCAACGCCACTGGAGCGCCGACTG

GCGCAAGCGTGCAGCGGGATTTCTGATTTGCAGGTGCCGCTGCGTGACTTGTGGAATCCG

GCAACCTGTCCAGTCAGTTTCCTGCCTTATCTCGCCTGGGCGTTCTCTGTGGATCGCTGG

GACGAGAGCTGGACAGAAAGCGTCAAACGCCAGGTGGTGAAGGATGCTTTTTATATACAT

CAGCATAAAGGAACCACCAGTGCTGTGCGGCGGGTGGTGGAGCCGTTCGGCTTCCTGATC

CGCATTATTGAATGGTGGCAGACCGGAGAAGCACCGGGAACGTTTCGCCTGGATATCGGC

GTGCAGGACCAGGGCATCACTGAAGATACCTATCTGGAACTTGAGAGGCTGATAAGTGAT

GCCAAACCATGTAGCCGTCACATGATCGGCATGTCCATCAATCTGCAGACCAGCGGCCCA

CATTGGATGGGGGTTGCCAGCTATCTTGGCGAAGAAATCACGATCTATCCGTATATCAAC

GAAACGATTATTTCCGGTGGCACCGCGCATGAAGGCGGGGCGGTCCATGTTATTGACACA

ATGAGAGTGAATCCATGAGCACAAAATTTTATACCCTGCTGACGGATATTGGCGCGGCGA

AACTTGCCAGCGCCGCCGCGCTCGGTGTGCCGCTAAAAATTACCCATATGGCGGTGGGCG

ATGGCGGCGGAGTATTGCCAACGCCGGACGCAAAGCAGACGGCACTGGTAAATGAGAAAC

GCCGGGCTGCGCTGAATATGCTTTATATCGACCCGCAGAACAGCAGCCAGATTATTGCTG

AACAGGTGATCCCTGAAAACGAGGGCGGTTGGTGGATACGTGAAGTGGGCCTGTTTGATG

AGTCCGGGGCATTGATTGCCGTGGGCAACTGCCCGGAAAGCTATAAGCCGCAACTGGCTG

AAGGCAGCGGGCGCACCCAGACCGTGCGCATGGTGCTGATTACCAGCAGTACGGACAATA

TCACCCTGAAAATCGACCCTGCTGTAGTGCTGGCAACCCGTAAATACGTGGATGATGAAG

TCCTGGAATTAAAGCTGTATGTGGATGACCAGATGAGAAACCACATTGCCGCACAAGATC

CTCATACCCAGTATGCGCAGAAACATAATCCGACATTTACCGGAGAACCAAAAGCGCCGA

CGCCTGCAGCAGGAAATAACACCACGCGGATTGCGACCACTGAGTTTGTTCAGGCCGCTA

TTACTGCTCTGATTAACGGTGCGCCAGCCACGCTGGACACACTGAAAGAAATTGCCGCAG

CCATTAACAATGACCCGAAATTCAGTACCACCATTAACAATGCGCTGGCACTAAAAGCAC

CGCTGTCGAGTCCGGCACTCACCGGAACGCCAACAGCACCTACTGCGGCACAGTCGGTCA

ACAATACACAGATTGCCACTACAGCTTTTGTGAAATCAGCGATTGCAGCAATGGTGGGTT

CTGCACCTGCGGCACTGGATACACTGAACGAACTGGCGGCGGCACTGGGGAATGATCCGA

ACTTTGCCACGACAATGCTTAATGCGCTGGCAGGTAAACAACCGCTGGACAATACGCTTA

CCAATTTGAGTGGAAAGGATGTAGCTGGTCTTCTCGCATACCTTGGTTTGGGAGAAGGCT

CTGCATTACCCGTTGGTGTCCCTGTTCCATGGCCTTCCGCCACTCCGCCAACAGGCTGGC

TGAAATGCAACGGCGCGGCTTTTTCTGCTGAAGAATACCCGGAACTGGCAAAGGCTTATC

CGGCAAATAAATTGCCTGATTTACGTGGTGAGTTTATTCGCGGCTGGGATGACGGGCGCG

GGGTTGACTCTGGACGAGGTTTGTTGACGGCGCAGGCGGAAACAAAGATAACTAACCACC

ACGGCAATGGCGGTAATGCTGATGATATTTCGGCTGGTGTCTCCGGTTCACCTCCCAAAA

ACTTTGTCAGAAACGCGGATTCGGCAGTTAATGCTGGTTCTGGTTTTACCGCTTTTGGCT

CTGGAAATTTGACAATGAATGGTGTTACTTCTTATTTCGGTGTCCGTCCACGCAACATCG

CATTTAACTACATTGTGAGGGCTGCATAATGGATAGCACTGTATTAAATAGCGAGTTTAT

TGCCACGAAGGCGGGGAATATTACTGTCTATAATTATGATGGTGAAACACGGGAATATAT

TTCCATATCGACTGAATATCTTGCCGTTGGTGTCGGCATTCCGGCATGTTCCTGTTTAGA

TGCTCCAGGCGCATACAAAGCTGGTTATACAATCTGCCGTTCTGCAGATTTTAACTCATG

GGAATATGTGCCAGACCATCGCGGTGAAATCGTCTTTAGCACCGCAACAGGAGAATCAAA

AGAAATCACAGCTCCGGGTAATTACCCTGATAATACAACCACTATCGCCCCATTAACGCC

ATACGATAAATGGGATGGTGAGAAATGGGTGACGGATACTGAGGCACAACACGGTGCCGC

AGTAGAAGCGGCAGAAGCACAGCGTCAGTCACTGATTGATGCAGCAATGGCTTCCATTAG

TCTGATTCAGCTGAAATTACAGGCCGGGCGGAAACTGACGCAGGCAGAAACAACCCGGCT

TAACGCTGTGCTGGATTACACTGACGCGGTGACGGCAACAGATACCAGCACCGCGCCTGA

TATTATTTGGCCTGTATTCCCTGAGACTGATTAACCTCAATTAGTATTGGTTCGCCTTTC

TCATTAATTGTTAGCTCCATGCCCTGAGGAATTTCTGTCATAGTAAAAAACCAGTTGTCC

TCCGGTAATTCAATAGCCCCGGTCACGTCATGAAGACCGGGGATTACTTCAGTCAAAGTG

TAGTGGCACACTAAATTTGGCCACCTGATGAAAGGTGATATTCTCACCACAACACAAAAC

AGGTGACTTAATGAACAAGAAA

>NODE_66_length_3357_cov_59.381889

CTACCGGGTCAACCTCGACTTTGACCGCGATACGTGGAAACCGGGTTATGAAAGCCTGTG

GGTACGCCAGTCGCGCCCGTATGCCGGTGACACCTACGGCCTGCATCTGCCGCTGCTGGC

GGGAACGGAAGTCAGCATCGCCTTTGAGGAAGGCAACCCGGACCGACCTTATATTGCAGG

CGTAAAACACGACTCGGCACACACTGACCATGTGACCATCCAGAACTACAAGCGCAACGT

TCTGCGCACCCCTGCCAATAACAAAATCCGGCTGGATGATGAGCGCGGTAAAGAGCATAT

CAAGGTCAGTACCGAATATGGCGGCAAGAGCCAGCTAAACCTCGGTCATCTTGTTGATGC

CGGGAAACAGCAGCGCGGGGAAGGCTTTGAACTGCGTACCGATATGTGGGGTGCGGTGCG

GGCAAAGAAAGGCATCTTTATCAGCGCCGATGCGCAGGATAAGGCGCAGGGTCAGGTCAG

AGAGATGGCCGACATTATCAGCGAACTGAACGGCCTGAGCGATAAAATCCAGAAACTGTC

CGATGACGCGACGATGGCGAACGCCGACCCGGCGGATATGGCCGCGCAGATAGCATTGAT

AACCAGCCGGATAAACGACCTGACCGCCCCGGTGATTTTGATGCACGCGCCGAAAGGTGT

GGCGGTCGCCAGCGGCGAGCACCTGCAACTGGCAGCGGTGAAAAACCTCCAGATAAATGC

GGGAAACAACGCCGATATCGGCGTGGTGAAGAATATGTTTATCGGCGTGGGGCGGGCGCT

GAGCGTGTTTGTGCGCAAGGCGGGTATCAAACTGATTGCCAATAAAGGCGCAGTATCGGT

ACAGGCGCAGCACGATTTGATGGAGTTACTGGCGAAGAAGTCGATAGAGATCGTCAGTAC

CGAAGATGAGATCAGGATTTCAGCGAAGAAAAAAATAACGATTAATGGCGGTGGAAGTTA

TATCCGGATTGAGGGTAGCGGCATTGAGCCAGGAACGCCGGGGGATTATAACGTCAAAGC

GGTGCATTATGGGCGTCAGCCGGGAGCGAAGCTGAAACAGGAAATGATGGCGTTTCCGAT

GATTGAATCTGGAGAATTTAATACCCGTTTCTTTTTTACAGATGATAATGATATTCCTTA

TGCAAACACCAAATATATAGCAAGATTACCAGATGGTACAACAAAAGACGGCATTACAAG

CGATGATGGTCGATCAGAAATATTTTTTTCTGATAAGGATGGGGAAATATTAATACATCT

ATTTGTCGAGCAGGATAAATAACATGGGTAGCTTTAATTTTGATGATGTTAAAACAACTA

TTGGAGCATTAAAAAAACAAAATGATTCGGGTGAGCCAAACGAGAAGAGTGTAAAGATTA

CAAAACCAGATCGCTACGTACTGTCTATTGGTTTTGAAGTCAATATAGAAAGGGCATTTC

AGAATGATACACTTGATCTGGCGATTGATTTTGGTCATGCGTTTTTGTATGTAACAAAAA

ATAATTTGGTAACTGATTTTTTTAGTTTTGGGCCAACCAAAGTTATTGCACCAGAAGGGG

AAAAAAGCGATAGCATAAAAAAAAGAGTCGGTATGGTAAATTTCCCTATTAAAGAAACAT

CCAAAATTTTCCGTTTTACCATAACAAAGAAACAGGTTGAAAAGATTCATTCCAAAATAA

AGTCTTTCAGTAACAAAGTTGATAATAAAGAAGAATATTTTGACGTGGTCACCAATAACA

CTTGCGCTAAGGTATCACAGTTGCTTCTGGAGCAGGCTGGTATATCAACCCCTGAGAGTT

CCAGCCATGTGAAGAGCAGTAAAGAAGAAGATTATAACTGGCTAACAGAGACATTTAATT

TTGCAAATCCTTATAAATGGTATAATAGTTTTCTAAAACAATTCGAACATCCGATTGGTT

GTTTAGGGCCTGATGGTAGCGATGCGCTTGATGACACACAACCTGCGAAGTACTATCATA

TTTTGAGGGATAGTTGGATTTTGATACCTAATCAAAGCGACGATCCGCTAATAGCAAATG

GTATGGTTTTGAAGGATGGGTCTGGGAAAATACATGGGACTGCAAAAAGTGGTTGGTTTT

CGGACTCTCTTGATAGGGGGAGCTATGATAGTTAGCAATGCTATAGCAGATGATAACACT

AAGAAATATTTTCTTTCTGAACGAATTAATTATGTATTGTCTTTGATTTCTGAAAGTAAA

GTTTTTAATCATATAGAAAATGATAATCTTTTTGATTCTATAGTTATCGAACCGGTAAAA

GAAGGTGACGAGATTAAGGGGGCACTTGTATATAAGGGTAGTAAATTAGCAATACTGGAG

AGGAATAGTAGTTACTCTCCCTGGAGTAAGTCATCTTTAATAGTTAAAAATTATGGATTT

CATGATGAAGATAATTTTTTTGTAAAGAACTTCTTTGATAATTTAAATCTACAATTCATT

CATCGTAAAAAAAATAGTTTTAAATTTGATGTTTCACAATATTCTAATAATCTTAGTAAA

GATTTTTGTAGATACTATTTCATTTGGGAGAAAGACCCTCTGGTACGTTTTTCATTAACA

AGCGACGCCGTTTTTTGTGAACAGCAGGAATTATATCCTATTAAGATTAGAACTATAACC

ATTGAAAAATATGGATCATAATATTTTTACAACTATAAAAGCATATATTGGGAAGCATTG

GAGCCTATCATGAAATGATAGGTGGTAAGTAGTAATAGTATGACTGGTTGCTTTAGAACA

GTAATACCCCCTTAAAATAGCTTCTTTTATTTTATTGTAAAATTAACCGCTCAAGTTAAT

ATGAGTTACAAATGTATATTTGAGTACACTCTATAAAACCGTTTGGATAATCCAATGGTG

AATAACAAGCCCTGTTTAAAAATATATATTTATCATGTATCAATTATACAAAAATAAGAA

AATAATAACTATCTATGTATACAAAATAAAATAATAGAGGCCATCATGGACATACTTGTT

TTTGACCACTCGTACCACAAACTCAAAATCCGCGGCCTGCAAAGTCCGGTGGATGTGCTG

ACCTTCGAAGGCCGCGAACAACTGAGTACCCCGTTCCGCTACGACATTCAGTTTACCAGT

ACCGATAAAGCCATCACGCCGGAGTTGGTGCTGATGCAGGACGGCGCATTCAGCCTGACG

GCACCGCCGGTACAGGGAATGCCGGTGCAGGCACCCCTGCGCACCCTGTACGGCGTCATC

ACCGGCTTTAAACATCTCTCATCGTCACAGGACGAAGCCCGTTACGAAGTACGGCTTGAA

CCCCGTATGGCGCTGCTGACCCGCAGCCGCCAGAATGCCATTTACCAGAACCAGACTGTG

CCGCAAATCGTCGAAAAAATCCTGCGCGAGCGGCACCAGATGCGCGGTCAGGACTTCGTG

TTTAACCTCAAAAGCGAATAC

>NODE_67_length_33531_cov_64.075516

ATCACAGAAGATTTCCTCGCCTGCCGGTCCCGTCACGACGGCGCTCTGCGGGCCGTCCAC

CAGCGGTTTCAGCAACGGCTGTGGCCGCCATGTCCGGTCTGCCGGGATTACCGCAAAGTG

GTTATCCAGCGTGGTGCCTGAACCCCTGCGTCCCGGTACCGCCTGCGGCTGTTCGCCGTG

AAGATCGCTCGCCACCACCTGCCATTCCCGGTTCAGGTTCGCCTGCGGATGCCCCGTCAG

CACAATTCGCCGTCCCGGCCATATCTCCGGCGAACGGCTTGTTCCGCGCGCCACTTCTGC

GTTGTTGCGCCAGCCATCCATCTGCCAGCGGGCAAAGTTCTGCCCGTGGGCACCCTTGAA

ACGTCCGGGGTAGTCATACACTTCATACTGTGTGCGCTGGTAATCCTGGTACTGGCCTTC

CTGATCAAAACGCCCTGCCCAGCCGGGTCGTTTAAAGGTGTAGTCTTTGGTCACCACGGA

AGAAGGGCGGATTTGTGCGCTGTAGCGAAACTGGCTGATGCAGAGGGTGCTCACCTCGGT

ACGGGTGTTCGGATTCCAGGGGATCTCAAAGGACTCCGGCAGATAACGCACGGTGTCGCA

CAGGACCAGGCTCTGGTCGGTACTTTTTTGCGCGTGCTCCTCATAAAAGAAGATGCCTTC

CTCCGCCGCCATCCGGCACAGGAAATCGTAATCAGTCTCACCGTACTGGACACAAAACTC

ACGGGAAGGATGTGGCTCGCTGAACAGCGGGCTCCACTCGGTCACCCCGTTTTCCTGCAA

TATCGTGCCGAGGATGCTTTCGATGTCCTCATTCTGGAAGATACGGAAGTTCTGGCGCAG

CCCTGTGCGCCACAGCGGTGGGCACACCTTCATGCTGTACAGCATCTGGTTTTTGTCGTT

CTCCCCCAGTTCAAACCAGGTCACCATACCTTTCACCCGGCGCTGTACGTCATCGCCCTG

CCATATCGTCAGGTAGGCCATTTTGTCGAGGATCTGCTGGAATTCAAGGGAGAGAAACTG

CTGGCTGACCAGAGAGAGATCGAGGGAAAAAAGCGAAGAGAGTGACTGGTTCAGATGAAA

GGAGACCACCGCAAAAGCATCCGGTGGCAGGCCGTCCACTTCCAGCGTGAAACGTAATCC

GGTTGACATAGCAACCTCCGGAGTTAAGGAAAAACAGACAGTTCGCTGTTAAAGCGGCTG

TGACAGTACAGTGTTACGCTTGCGTTCAGGCACGCTACCGCCGAAGTTTCCGGCAGCCGC

CATCTCCCGTGAACGTAACCCCTTACTGACAACCTTTCTTTCTACGGCGTAATACAAAAA

CAGCATCCGGCCTGATAGCCGGATGCTGTTGGCTTAACTTATGCTTCCAGCGGTGCGCGC

CAGTCGTCGGCACCGGAGGTGCCAGATTTGACGTGTTCCCATTCAATTTTGCGGTAGGCC

AGTGAAACTTCGAGCAACTGGGTGAACTCGCGTTTCGCCGGGTCCTGGCAATGCGGCATA

TGCAGTTTCATATCGACAATCGTCGAATCAGTCAGGCGGGTAGTGAAATAATGCTCCTGT

TTGCCCTCCACAGAGGTACGCCACCAGTGAAGTTCAGTGGTTGGCAGCATTTCGCCGGAG

GCCAGTGCGTTGTACATCAGCGGAACCGCTTTGTTCAGCGCCACGGTAAAAATGAAAGGC

TTGTGAGCACGCTGACCCGCAGGCTGACCGGACTGAGGATCGGTCGGGACAGTAACGTTA

TGCAGGAATTCCTGCACCAGCATCTCGTCTTCGTGCCCCTGCACATAGATGTTGCCGACA

GAATCAGCGGTAAATGCACCTGCAGTAATATTTCCCTGGGTCTGACCAGTGATGGAGATA

TAACACGGTGTTGGCATTTGTAAACTCCTTGTTAACGTGGTTAATTACTACTTACAATGA

CCTGCCGTTAATCCCAGACAGGCAGATGCAGCTCACTTCACGGAACCGCATCATTTTTCA

GTATTTTTTACATACAAACCGAGCTAGAATTTACGGTTGTCGTAAAAACTATTTTTAAAA

TCATTAAATCTCTTATTCAGCAATAACTTAATAATATATATCTGGATAACCATACCCAAC

TGTTCAAAGTCCGTATTGCCTCCATAAAATGGCCAAAGCTGAATCATGAATAAATATTGT

ATTTATCCTTTCTGAATTATCATTTTGATAATTTTTGAGATATTCCTTAAAAATACCCAC

TTAATCAATCACAAAACAAATATATAAACAAGCAATCATTAGATTAGCTTATGTTTAATA

AAATTATTATATAATTCAATAAGATGCATAAAAAAACTCTATATTTAAATTATTGCCATA

ATACACCTGACGCGAATTGCACAGGTTCATACAATCTATTTAACGCTTGCAGAATACCCC

TCTTTACGATCGATAAAAAGTCCTTTTCTTATTTATTTTGAAGCGTAAAATGCGGGGTGA

TGAAGGAGTGGTGATTTTATTTTCACCGCCATCAAGGCGGCATTTCCGATATTTTTTGCG

GTACGAATATGCCGTGTTCATGGCCTGTACGAGATAACATGACGGATCACTTTTATGAGC

AAAAAATTTGAAGGCAGCGTCGCGCCTCGCGAGCGTATTAATATATCGTATGTCCCAAAA

ACAGATGGCCAGACGGCTGAAGTGGAACTTCCGCTTAACATGCTCGTTGTCGGCGATACC

GGAAATACGCAGGAAACATCCTCACTGGATGAACGTCAGGCAGTTTCCGTTAACAAGCAC

AATTTCGGTGCAGTGATGGCTGAAGCAGCCATTGGCCTCAATTTTACTGTCCCCGCCACC

CTGAAGGGAAGCACAACAGACGATGAACTGAATGTGGCGCTGAATATCAAATCACTGGAT

GATTTTTCACCAGATAGCGTGGCCCGGCAGGTTCCGGAAGTGAATAAATTGCTGGAACTG

CGTGAAGCACTGACTGCACTGAAGGGGCCGATGGGTAACCTTCCGGCATTCCGTACCCAG

CTCCAGGCATTGCTGGAAAATGAAGAGTCCCGCGAGCAGTTGCTCAAAGAAATCGGTCTG

GTGAGCAATAAATAACCACCACTATTTCATTAAACAGGGTTATCCAGGCATGACGGCACA

CAAAAATATCTCCGGGACATACCACCTCTCTGTTGCAGACATTCTGCAGGTGGTTTACCA

GGTATGTTTCAGCCCGTCCGTTGAAATCAACCAGGATGGTGTGGCTGCGCTGATTACAAC

ACTGGATCGCCGTATCAGTGATCTATTGGATGAGATTATCCATTTTTGTGAGTTTCAGCA

GAGCGCGTCGCACTGGCAGCGCGTACTTCACTGACGGCGAAAAGCCGGTTTCAGAAACAC

AGCTAAAACAGAAGGATTTTCAGTATGTCTTTACAGGAAGAGGAACTCGTATCCAGTCAT

GCCGGGCAGCCTGAGCAGGCATCGTCGCTGCTTGATCAAATCATGGCACAGACCCGTATT

CAGCCCGGTTCGGAAGGTTATGACGTTGCCCGCCAGGGTGTGACAGCCTTTATTGCCAGC

ATCCTGCAATCCACTGCATCTGCCGAACCGGTCAATAAACTGGCCGTGGACAGCATGATT

GCAGATATTGATGAACGCATCAGCCGCCAGATGGATGTCATCATCCATGCGCCTGCCTTT

CAGCAGGTCGAGTCGTTCTGGCGCTCACTGAAAACCATGGTGGATCGCGTTGATTTCCGT

GAAAACATCAAGGTCAACGTGCTTCATGTCACCAAGCAGGAACTTCTGGAAGACTTTGAG

TTTGCGCCAGAAATTATTCAGTCCGGATTTTATAAGCACGTTTATTCGTCCGGTTTCGGA

CAGTTTGGCGGTGAACCCATCGCTGCCGTGCTGGGCGCTTATGAGTTCAAAAATACCGCG

CCTGACATGAAACTGCTGCAATACGTCAGTGCCGTGGGCGCAATGGCGCACGCACCGTTC

CTGTCCTCCGTTTCCCCGGAGTTTATGGGGCTGAACTCGTGGACCGAACTGCCTAATATC

AAAGATCTTTATGCCATCTTTGAAGGTCCGGCCTACACCAAATGGCGCGCCCTGCGTGAC

TCGGAAGATTCGCGCTATTTAGGGCTTACGGCACCCCGCTTCCTGCTTCGCCAGCCCTAT

TCACCAACAGATAACCCTGTTAAGAACTTTAACTATTACGAAGATGTCAGCCAGAACCAC

GAAGATTATCTGTGGGGTAATACGGCCTGGATGCTGGCATGCAATATCGCAGACAGTTTT

GCCAAATACCGCTGGTGTCCAAACATTATCGGTCCGCAAAGCGGCGGCGCAGTGAAAGAT

CTGCCGGTGCATCTGTTCGAAACGATGGGGCAGATTCAGGCCAAAATCCCAACCGAGGTG

CTGGTCACCGATCGCCGCGAATTTGAACTGGCTGAAGAGGGTTTTATCACCCTTACCATG

CGTAAAGACTCTGATAATGCAGCCTTTTTCTCTGCAAACTCGGTACAAAAACCGAAGCAC

TTTCCGGGAAAAGATGCAGAAACCAACTATAAGCTGGGTACGCAGCTTCCTTATCTCTTC

ATCATCAATCGGTTAGCGCACTACATCAAGGTGTTGCAGCGTGAACAACTGGGGTCATGG

AAAGAAAGGAGCGACTTAGAAAGAGAGCTTAATACCTGGATCCGTCAGTATGTTGCCGAC

CAGGAAAACCCGCCTGCAGACGTGCGCAGCCGCAAACCTCTGCGCGCTGCCAAAGTTGAG

GTTATGGATGTAGAAGGCGAACCCGGCTGGTACCAGGTTGCGCTAAGCGTGAGACCTCAT

TTTAAATTTATGGGGGCAAATTTTGAGCTTTCCCTGGTTGGCCGGTTAGACAGGGAGTAA

CACACCATGATACCGGATCGGGAAAGAACCACAGGTTCTCTTTTTGAGCGTATGGAAGCC

TCTTCGGCCAGAAACCGGCAGGGAGGCAGTATTCATTCGCTCAGGCAATCCATTCGCCAG

AACCTACGAAACATTCTTAATACCCGGTCCGGTAGTTGCCGGGGTGCGCCTGAGCTGGGC

ATTGATGAACCGGAAGGGGCTGAAAACTTCCGCGAATCCATGAGTCGGGCCATCGAGCAA

TGTATAGAACGCTATGAACCCCGGATCTCACACGCTGAAGTGCAGGCAGTGGTTTCATCC

GCCTCCAGCCCGCTGGATATGACGTTTCATATTACAGCCTGGGTGACATTTAACGAAACG

CATGAGGTGCTTGAATTTGATATGGCACCGAATGGCAGCCAGCATTACCGGGTGGACTGA

CAAATGGAATTTGAAGAACGCTATTTCCGGGAAGAACTCGATTACCTGCGCCAGCTTAGC

AAGCTGCTGGCAACGGAAAAACCCCATCTGGCCCGCTTCCTGGCCGAAAAAGATGCGGAT

CCGGATATTGAACGCCTGCTGGAAGGGGTGGCTTTTCTTACCGGCAATCTCCGCCAGAAA

ATTGAGGATGAATTCCCAGAACTGACGCACGGGCTTATTAAGATGCTATGGCCTAATTAC

CTGCGTCCGGTTCCGGCAATGACCCTTATTGAATATACGCCGGATATGGATAAGTCTTCT

GTACCGGTGTTAATCCCCCGTAATGAGCAGTTTACAACCAACGCCGGGGAAATCAGAGTT

GATGAAGTGCTGCCCTCTGATGCTAAAAAGGAGGAGCCGCCTCCCTGTACCTTCACCCTC

TGCCGGGATATCTGGCTGCTGCCCGTTCGCCTGGAGCAGATTGAAAACCGCAGTACGACC

CGTAATGGTGTTATCAACATCACCTTTTCGGTCGCACCGGGAACGGACTTCCGCACGCTG

GATCTGAACAAACTTCGCTTCTGGCTCGGCAATGACGACAACTATACCCGTGACCAGCTT

TATTTATGGTTCTGCGAATACTTGCAGGGTGCCGACCTGACTGTGGGTGAACAGCATATT

CGCCTGCCTGAGTTTATGCTAAAAGCTGTCGGTTTTGAGCCGCAGGATGCCATGCTGCCC

TGGCCGAAAAACGTCCACAGCGGCTACCGGATCCTTCAGGAGTATTTCTGTTACCCCGAT

GCGTTTCTCTTTTTTGATCTTTGTGGTTGTCCGGCTTTGCCTGACGGATTGCAGGCGGAA

TTCTTTACCCTGCAACTGCGTTTTTCGCGCCCTTTGCCCGTGGACATCCGGCTGCGCCGC

GATTCCCTGCGCCTGTATTGCGCACCTGCCATTAATTTATTTATCCACCATGCAGAAGCC

ATCACGCTGGACAACCGGCGGGCAGACTATCCGCTGGTTCCCAGCCGCCATTACCCACAA

CATTACGATGTATTTTCCGTTAACAGTGTGGTGAGCCAGGTCCAGGATATGTTCAGGAAA

AAAGATCTGGGGCGTCCTGTTTCGACGCAGGCCGCGCGCCAGTGGCCAGCCTTTGAAAGT

TTCAGCCATCAGATGGAATACAGCCGGAAGCGGGAAGTGGTGTACTGGCATCACCGGACC

AAAACATCCCTGTTCCATCGCGGCTTTGATCATACCCTTGCCTTTATACATGCTGATGGC

AGTTATCCGTCAGACGAATCTCTGCTCAGTAATGAAGTGGTTTCGGTATCGCTGACCTGT

ACCAACCGTGAGCTTCCGTCACAAATTCGTTCCGGTGATATCACCGGCACAACCGGTAAA

AATGCGGCTGTTGCTTCATTTCGCAACATTACCCGCCCGACGCAACCACTCTGGCCGGTC

ATTGATGGCAGCCTGCACTGGTCCCTACTCTCCGCCATGAACCTGAATTATCTGTCATTA

CTGGATACGGACGCGCTGAAGCAGGTCATCGCCAACTTTGATCGCCACGCAATCCATCAT

CCGCAGACGGCACGGCTGTCACAACAAAAGCTGGATGCCATTGAGCGTCTGGAGACCCGC

CCCGTTGATCGCCTGTTTACGGGTATTCCCGTCCGGGGACTGGCCTCCACGCTGTATCTG

CACCCGGAGCCGTTTGTCTGTGAAGGGGAAATGTATCTGCTCGGTACGGTGCTTTCGCAT

TTTCTGTCGCTGTACGCCAGCGTTAACTCATTCCACATGCTGACCGTTGTGAACACAGAA

AGCCAGGAGACATGGAAATGGACGGAAAGAATCGGGCAGCATCCTCTTATCTGAGTCCGG

GAAATCCCCCGGCAGATAAAGAGCAGAATGATCCGCTGGCACAGGTTTTCCATAATGCCT

GCTCTTACAATTTTTTTGCGATGGCGGAGCTGTTGCACCGCCTGGCAAAGGGTGAAAAGG

GGACGCCAGAATTATCCCTGCGTGACGATCCGGCACAGGAAACCCTGCGTTTCAGCGCCG

ATGCCAGCCTTGCCTTCCCGTGCAGTGATATCAGTGCGCTGAAACGGGATACATCAGGGG

CATTCAGGATGACCACCACCTTTATGGGGTTACAGGGGAGCCAGTCGCCTCTCCCCGGTT

ATTACCTCGATCACCTGGCCTGGAAAGCGGTACATGAACAAAGTCCGGTAGGTGATTTTC

TGGATATGTTCAGCCACCGCCTGACCCAGTTTGTCTGGCATATCTGGCGTAAGTACCGCT

ATCACATCAGTTTTCGTAACGGCGGTGTGGATGCGTTCTCGCAGCGCATGTACTCCCTTG

TCGGGCTGGGCCACCGCCAGCTTCGCGATAAGCTGGCGATTAATCACAGCAAAATGCTGG

CGTATTCCGGGATCCTGGCAAATCCGGGACGATCCCCGGAAATAATCTGTGGCCTGGTGT

CCCACTGCTTTGATTTGTCAGAAGTGACGCTGCAAAACTGGCAACGTCGCAAGGTGGATA

TTGAACCGGATCAGCAAAATAGTCTGGGGAGCTATTCTCTTAAAAATGGCGAAAAACTGG

CGGGAAGATCGGTACTGGGCAACTTTGTTCTGGGTACACGAGTGCCCGATCTCAGCGGAA

AATTCCAGCTCAGTATTACCAGCCTGACCCGAAAACAGTTCCTCTCTTTTCTGCCGTCCG

GCGAAAACTTCCTGCCACTGACGATGTTCGTGTCCTTCATCCTGCGCGATCAGCTTGCCT

GGGACTTACATCTGGGGCTGGCGCCGGAGCAGGTGGGCGCAATGCGCCTGGGCGATAACA

AAAGTGCGCTGCTGGGCTGGACCAGCTTCCTCGGCACACCGGAAGAACGACCCTCAGTCA

CCATCAGGGTACGGTCGTAAATTATGATAATCACGGAGCAGAATATGCCGGAAGAGAAAC

TACAGACGCTTTCATTGCAGGTCATTAACGGCAGTGAGCTGGAAAGCGGACGGGCGGCGC

GCTGTCTGTTCACACAGCAGGGAAATGTCGGCCATGGCCCCGAATGCCACTGGTCGGTAC

AGGATCGTCAGCAGAGCATTCCGGCCCAGGCTTTTACCGTTATCCTGCACGATGGCACAT

TTTGTCTGCGCCCGCAGACGGCACAACTGTGGCTGAATCAGGCAAAAGTCACAGCAACAT

CAGACCTAATACAGTTGCGCCAGGGCGATGAGATCCAGATCGGACGGCTGATGGTGAGGG

TTCATCTGAACCGGGGAGATATTCCCCATTACGATGAGGAAATGGCCACTCCCGAAACCA

TCGTTACCAATCGCGATATGCTCACGGATACCCTGCTATCAACGGAGGGTACGCCACACT

ATCCGGGAATGACTCACCGGCACCAGCTTGCAGACACCGTGGTAAACGGTTTTTCTGCCG

ATCCACTCCAGGCACTTCAGTCCGAAAGCCTGATTACCACGGGCGATCCGCTTTCAGGCA

TTGCGGCTGTCCGGCCATCGGCACCGCTGTCCGATCCGGCAAGTAATGGGGGGATCAATA

CTCCGTTTATGGATCTGCCGCCCATTTATGCCAGCCCCGGCGATCGTAATGACGACGTCT

CTGCGGCAGAAATGGCGCAACGCCACCTTGCGGTCACCCCCTTACTGCGCGGTCTTGGCG

GCTCGCTTACCATGAGCAATTCCGACGATGCGGATGATTTTCTGGAGGAGGCCGGACGAA

CGTTACAGGCCGCAATAAAAGGTCTGCTCGATTTGCAGCAGCAGCGTAACAGCCTCTCAG

ACAAACATTTGCGCCCGCTGGAAGATAACCCGCTGCGCCTGAACATGGATTACGCCACCG

CGCTCGACGTAATGTTTGCCGAAGGTAAAAGCCCGGTACATCTGGCGGCTCCCGCCGCCG

TCAGTGAAAGCCTGCGCAATGTCCGCCACCACGAAGAAGCTAACCGGGCAGCGATTGTGG

AGTCGCTTCGTGTCCTGCTGGATGCTTTCTCACCACAAAATCTGCTGCGCCGCTTTGTGC

AGTACCGCCGCAGCCATGAACTGCGCCAGCCGCTGGATGATGCCGGAGCATGGCAAATGT

ACAGCCATTATTACGAAGAACTGGCCTCCGATCGCCAGCAGGGGTTTGAGATGCTGTTTA

ACGAGGTCTACGCCCAAGTCTATGACCGGGTGCTTCGTGAAAAACAGCGGGAGCCGGAAG

CATGAACAGGAAGGCGTTTCTGGCCTGCGTGCTGATGTGCGTCATATTAACCGGCTGCGA

AACGGCGAAAAAAATCAGTGAGGTGATCAAAAACCCGGATATCCAGGTCGGGAGCCTGAA

GGAGCAACCTTCGGAAATAACCGTCACCCTGCTGACCGAACCGGACACCAATACCAATGC

GGAAGGTGAATCAGCCGCCGTGGATGTGCAACTGGTGTACCTGACTGACGACTCAAAATT

GCTGGCAGCCGACTATGACCAGATAGCCAGTACGCCGCTACCGGATGTGCTGGGTAAAAA

CTATATCGACCACCAGGATTTCAACCTGTTGCCGGACACCATCAAAACCCTGCCGCCGGT

AAAGCTGGATGAGAAAACGCAGTTTATTGGTGTCGTGGCCTATTTCTCCGATGACCAGGC

CACTGAATGGAAACAAATCGAGACGGTGGAAGGAACCGGCCACCATTACCGCCTGCTGGT

GCATGTACGTCAAAGCAGCATCGAAATGAAAAAAGAGGATGAATAATTATGGCAACCACC

CGCAACAAGGTGATGTGGCAGGAAGGGATGCTGATGCGTCCACACCATTTCCAGCAGCAG

CAGCGTTACAACGACTACCTGGATAACCAGCGTTTCCGGGCCATGAATAATTTATCCTGG

GGATTTACCGAACTCACTCTCAACAATGAACTGCTGGCACAGGGTAAGATCATGATTGAC

AGCGCGTCAGGCACACTGCCCGACGGCACCGTCTTTTCTATCCCCGACCAGGACGCACTG

CCCGATCCGCTGCACCCGCAACATTTTCCGGACGAGAGAAGCCGCAATATCTACCTCGCT

CTGCCGGTCGCCAGTGATGTGAGAAATGAAATCAGCGACGGGCGGCGAATCGGGCGTTAC

CGGCTGAATTATGCCGATGTCCGGGATTTGCATTCAGAAGAAGGTGACACGCGAACACTG

ACGCTGGGACAACTGACGCCGCGCATTATGAGCGGTGCAGAAGATATGAGCGCCTATATT

ACGCTCCCGCTTTGCCGTATCAGTGATCGCCATGCCGACGGCTCCCTGACGCTGGATGAC

GATTTTATCCCCTCCTGCCAGAATATTCAGGTCAGTAAGAAACTGCGTGTTTATCTCAAA

GAGGTACAGGGGGCCATTGGCGGACGGGCAAGCGATCTGGCAAACCGCATTGGCTCTCCG

GCGCAGAGCGGCATCGCGGATGTGGCGGAATTTATGATGTTGCAGTTACTTAACCGTAAC

CAGACCCGGTTTACCCATCGCGCTCGTCGATCCCAGCTCCACCCGGAAGATTTCTACCTT

GATCTTGCCGGGTTGCTGGGTGAACTGATGACCTTTACCGAGCCGTCGCGCCTGCCCTGC

CCGCTTGATGTGTATGATCATCATGACCTGACCAAAACATTTAAAACGCTGTTACCGGAA

GTCAAACGGGCGCTGCATACCGTACTGTCGCCAAGAGCCGTTAATCTGCCGCTGCATCTG

CGTGACGGTATCTGGCAGGCCGATATCCATGACACAGAACTGCTGCAATCTGCCACCTTT

GTGCTGGCTGTGGCGGCAAACATGCCGGTCGATCAGATCCAGCGCCAGTTTATCCAGCAG

TCGAAAATTTCCTCGCCGGAAAAAATCCGCAATATGGTCAGTGTGCAGATACCCGGCATT

CCATTGCGTGCCCTGATGGTGGCTCCCCGCCAGCTTCCTTACCATTCCGGGTTCAGCTAT

TTCGAACTCGACAAGAGCGGACAGGCCTGGACAGAAATGGCTGCCGCCGGGGCCGTTGCA

CTGCATGTATCCGGCAGTTTCCCGGATCTGAACATGCAACTGTGGGCGATAAGAGGGTAA

GACGATGGATGAGGGGTCACTGTCTCTGCCACCATTTACCGGATACGACGAAAAAAGCCA

GCGCGACTATCATCTCGCGCTTCGTGGCAACAGCCTGAATCCGATGATCGACGCGGCCAC

GCCGCTACTCGGTATGGTAATGCGCCTTTCAACCATGAACAGCCAGACGATGCCGGAGCA

TCTTTTTGCTCAGGTGGTGACGGATGTTCAGGCCGTGGAGCAACTGCTTCAGGAGCAGGG

CTACGAACCGGGCGTGATTATCTCGTTTCGCTACATCCTCTGCACGTTTATTGATGAAGC

GGCGCTCGGTAACGGCTGGTCGAACAAGAACGAGTGGATCAAGCAGTCATTGCTGGTCCA

TTTCCACAACGAAGCCTGGGGTGGAGAGAAAGTTTTCATCCTGCTGGAGCGCCTGATCCG

TGAACCCAAACGTTACCAGGATCTGCTGGAATTTCTCTGGCTCTGTTTTTCTCTGGGATT

TCGCGGGCGCTACAAAGTGGCAGCACAGGATCAGGGGGAATTTGAGCAGATCTACCGCCG

CCTGTACCACGTCCTGCATAAACTACGCGGCGATGCCCCTTTCCCGCTGTTACACCAGGA

CAAAAAAACCCAGGGCGGGCGTTATCAGCTCATCAGTCGCCTGACCATTAAACATATTTT

TTGTGGTGGCGTTGTCGTGCTGGCGTTGTTTTACCTGTTCTATCTGTTGCGGCTGGACAG

CCAGACGCAGGACATCCTGCACCAGCTAAACAAATTACTTCGATAAGGACGTTTATGATC

CAGATTGATCTTCCCACGCTGGTAAAACGGCTTAACCTGTTCTCCCGCCAGGCGCTGGAG

ATGGCCGCCTCTGAATGTATGAGCCAGCAGGCAGCGGAAATTACCGTCAGCCATGTGCTT

ATTCAGATGCTCGCCATGCCACGCAGTGACCTGCGGGTTATTACCCGCCAGGGCGATATT

GGCATGGAAGAGTTGCGCCAGGCGCTGACGGTGGAGAACTACACAACTGCCCGTTCTGCG

GACAGCTACCCGGCATTTTCCCCGATGCTGGTTGAGTGGCTGAAAGAGGGCTGGCTGCTG

GCGTCGGCTGAGATGCAGCACAGCGAATTGCGTGGCGGCGTGTTGCTGCTGGCCCTGCTG

CATTCGCCGCTGCGTTATATACCGCCTGCTGCCGCCCGGCTGTTGACCGGCATTAACCGT

GACCGTCTGCAACAGGACTTTGTGCAATGGACACAGGAGTCGGCGGAATCAGTCGTGCCG

GATGCAGACGGTAAAGGCGCAGGCACACTGACGGACGCTGCTGACACCCTGCTTGCCCGC

TACGCCAAAAACATGACCGCAGACGCCCGTAACGGCAGGCTTGACCCGGTACTGTGCCGC

GACCACGAAATCGACCTGATGATCGACATTCTCTGCCGCCGCCGCAAGAACAACCCGGTG

GTGGTGGGCGAAGCAGGCGTGGGTAAAAGCGCCTTAATCGAAGGGCTGGCGCTGCGCATC

GTGGCAGGCCATGTGCCGGACAAGCTGAAAAACACCGATATCATGACCCTTGACTTGGGC

GCATTGCAGGCCGGAGCGTCGGTGAAGGGTGAATTCGAAAAACGTTTCAAAGGGCTGATG

GCGGAGGTCATTTCCTCCCCGGTGCCGGTCATTCTGTTTATCGACGAAGCACATACCCTG

ATTGGCGCGGGCAACCAGCAGGGCGGGCTGGATATCTCCAACCTGCTCAAACCGGCGCTG

GCGCGCGGCGAGCTGAAAACCATCGCCGCCACCACCTGGAGCGAGTACAAAAAATACTTC

GAAAAAGATGCCGCCCTGTCGCGCCGCTTCCAGTTGGTGAAGGTCAGCGAACCCAACGCT

GCCGAAGCCACCATTATTCTGCGCGGTCTGTCGGCGGTCTATGAACAGTCTCACGGCGTG

CTGATTGATGATGACGCCTTGCAGGCCGCTGCGACATTAAGCGAGCGTTATCTCTCCGGG

CGTCAGTTACCGGACAAAGCGATTGATGTGCTGGATACCGCCTGCGCCCGTGTGGCCATC

AACCTGTCGTCGCCGCCGAAGCAAATCTCGGCGCTGACCACTCTGAGCCACCAGCAGGAG

GCGGAAATTCGCCAGCTTGAGCGCGAGCTTCGCATCGGACTGCGTACCGACACATCACGG

ATGACCGAGGTGCTGGTGCAGTATGATGAAACGCTGACGGCGCTGGATGAACTGGAAGCG

GCCTGGCACCAGCAGCAGACGCTGGTCCGGGAGATTATTGCGCTGCGCCAGCAGTTACTG

GGCGTGGCAGAGGACGATGCGGCGCCGTTGCCGGACGCAGATACCGTGGAGGATACGCAG

CCAGAGTCAGAGTCAGAGTCAGAGTCAGAGTCAGAGTCAGAGTCAGAGTCAGAGTCAGAG

CAGGATAATACCGGTGCCGAACCGGCTGATGAAGCTGGCAGCGAACAGCCGGAAGAGACC

GCTGAAACAGTTTCCCCGGTACAACGTCTGGCACATCTCACTGCCGAACTGGACGCCCTG

CATAACGACCGGTTGCTGGTTTCCCCGCACGTCGATAAAAAACAGATTGCGGCGGTGATT

GCCGAATGGACCGGCGTGCCGCTTAACCGCCTGTCGCAGAATGAAATGTCGGTCATCACC

GACCTGCCAAAATGGCTCGGCGACACCATCAAAGGCCAGGACCTGGCGATTGCCAGCCTG

CACAAACACCTGCTGACCGCACGCGCCGACCTGCGCCGTCCGGGACGCCCGCTGGGCGCG

TTCCTGCTGGCTGGCCCCAGCGGCGTGGGTAAAACTGAAACCGTCCTGCAACTGGCAGAG

CTGCTCTACGGCGGTCGCCAGTACCTGACCACCATCAATATGTCCGAGTTCCAGGAGAAA

CATACCGTCTCGCGACTGATTGGTTCGCCTCCGGGCTACGTTGGCTACGGTGAAGGCGGC

GTACTGACCGAAGCGATTCGCCAGAAACCCTACTCGGTAGTACTGCTCGATGAAGTGGAA

AAAGCGCACCCGGATGTGCTCAACCTGTTCTACCAGGCGTTCGATAAGGGCGAAATGGCA

GACGGTGAAGGCCGCCTGATTGACTGCAAAAATATCGTCTTCTTCCTGACGTCCAACCTC

GGCTACCAGGTAATAGTCGAGCATGCCGATGACCCGGAAACCATGCAGGAAGTACTGTAT

CCGGTGCTGGCCGACTTCTTCAAACCTGCCCTGCTGGCGCGTATGGAAGTGGTGCCGTAC

CTGCCGCTGTCGAAAGAGACGCTCGCCACCATCATTGCCGGGAAACTGGCCCGCCTGGAT

AACGTGCTGCGCAGCCGCTTTGGCGCGGAGGTGATTATAGAACCGGAAGTGACGGACGAA

ATCATGAGCCGCGTCACCCGCGCGGAAAACGGCGCGAGGATGCTGGAATCGGTCATCGAC

GGCAATATGCTGCCGCCGCTCTCCCTGCTGCTGTTGCAGAAAATGGCGGCGAATACGGCG

GTTGCCCGGATTCGGTTGTCGGCAGTGGACGGCGCATTTACGGCAGACGTGGAAGATGCT

CAGAACGACGAGTCCGTCACAAAGGATGAAACGGTTTTATGAGCAGGTTGCGCGTTTTCC

GGCAGACAGGATGGTTTATCGCGGGCCTGATGACGGGCTTACCCGCCACTGCCGCGCCCG

CAGAAGCATCGTCAATGGCCGGTGTGGCGGTCGCCGTCGCCACCACGACCCCGCCGGATG

CGACAGCCACGTTACAGGCCATGCAGTCCTGTCGGCGGGAGTCCGCGGCGCTGGAGCGGC

TTGACTGCTATGACCGCCTGCTGGCACCGCTGTCCCCGTCAGGGTTTGACGGGGCGCTGG

TCAAAGCCGGTTTTGTGGGCGAGGCCTGGACCCGCGCCACAGAGCAGGAAAAACGCCGCG

AGGGCAACACCACAGAACTGCTGGTGACGCAGGTGCCGGGGGAGCGCCCGACGGTGGTGA

TAACCACCCCGGCTATCGGTCATGTTCCGCCACGCCCGGTGCTGATGTTCAGTTGCGTGG

ACAATATCACCCGGATGCAGGTGGCGCTGATGCACCCTCTGGATGTCCATGATATCGCCG

TCACTCTGAATGCCGACAACCGGGCATTGCGCAGCCACTGGTTTGTGCGCGAGAACGGCA

CCCTGCTGGAGTCCAGCCGGGGGTTATCCGGGATTGATGAAATTAAGCAACTGTTCGGCG

CAAAAACGCTGACGGTGGATACCGGCGCAGACAATGCCGCCGGAAAGCTGACCTTTAACA

TTGACGGGCTGGCAAGGGCGATTGCTCCCCTGCGCGATGCCTGCCACTGGGCGGGAGAAT

AAAAATATGGCAATGGACTTACGCGATCCGAATGTCTGGGTATCGCACCTGCTGGAAAAC

CTGCCGGAAGAGAAACTGGCATCGGCGCTGAAAGATGACAACCCGAACTGGGAGTATATC

GACGGCGAAATCGTCAAGCTGGGATCGCTGGCCCACAGTCAACTGGATATCCCGGAACTC

CAGCGCCGGGGGCTGGTCATTCTGGCTTCGGAGAGTAAGGATTTTCGTCTGCTGGCGCAT

CTGCTGAGAACCCTGCAACACGCCGGTGATCCTCATCTCGCATTGCGCCTGCTGGCGCTG

TATGTGGAGCATTACTGGGCGGTGGCTGCGCCGCAGAATATGGCGCATAAAAAACGCTTT

GCCAGCCAGGTCATTAAACGCTTTGAAACAGGTATTGAAGTTTTTTCACAGAACGCCGCC

ACAGCGCAGCGCGATGCGCTGTCAGGGGAACTGGCAAAACTGGCGCAATGCTGGCAGTCA

CATAACGCCCCGGAACTGGCACAGGCTACTGATGATCTTTTTGCCCTGTACCAGCGTGCG

TTTAATCGTGCGGCACCGGCTCCTGTCCCCACTCCGGCGGCCTCCGGTAGTTCACCACAG

ACCACCGCCACGTCTGAAAGCGGCGTGACGCAACCCAGTGCTCCGGCTCCCCAAATCGTC

ATCGACAGTCACGACGACAAAGCCTGGCGCGACACGCTGTTAAAAGTGGCGGCCATTTTA

TGTGAACGCCAGCCGGATTCACCGCAGGGCTACCGTCTGCGCCGCCATGCGCTTTGGCAG

AACATCACCAGTACGCCCCAGGCGGAAAGCGATGGCCGTACTCCACTGGCTGCGGTCTCC

GCCGATATGGTGGCAGATTACCATGCTCAGCTCGGTAGTGCCGATATGGCGCTGTGGCAG

CAGGTGGAGAAAAGCGTACTGCTGGCTCCTTACTGGCTGGATGGTCACTGCCTTTCTGCA

CAGACGGCGCTGCGTCTGGGTTACAAACAGGTGGCAGACGCCATCCGCGATGAGGTCATC

CGCTTCCTTGAGCGTCTGCCCCAGCTTACCGGGCTGCTGTTTAATGACCACACACCGTTT

ATCAGTGAGCAGACGAAACAATGGCTGGCAGCTTCGCCCGACGCCAAAGTTGCACCGGTT

GCGCAAATCGGTGAGGAATCGAAGGCAGCCAGAGCCTGTTTTGCTGAGCAGGGTCTGGAG

GCGGCGCTGCGATATCTGGACATGCTACCCGAAGGCGATCCCCGCGATCAGTTTCACCGC

CAGTACCTTGCCGCACAGTTGACGGAAGAGGCGGGGCTGGTACAGCTTGCGCAGCAGCAG

TACCGGATGTTGTTCAGGATGGGATTGCAGATGATGGTGGCAGACTGGGAGCCGTCCCTG

CTTGAGCAGCTAGAACAAAAATTCACGGCAGAACAATAAAAGAGAACAGGAGTTTTTGTG

TTCAGATTACCAACACCCCGACTACTCAGCGGACTCAAATCAGCCCTGCGACCGGCGATG

CCCCGGTTTAAAGTCTCTGCTTTCTGGCTGCTGATACTGGCGTGGATTTTTCTGCTGGTG

TGGATCTGGTGGAAAGGCCCGATGTGGACGCTGTATGAAGAACAGTGGCTCAAACCACTG

GCGAACCGCTGGCTGGCAACGGCGGCGTGGGGGATTATTGCCCTGGTGTGGCTTACCGTC

CGGGTGATGAAGCGCCTGCAACAGCTTGAAAAAATGCAAAAGCAACAGCGCGAGGAAGCC

GTTGATCCGCTCAGCGTGGAACTGAACGCCCAGCAGCGTTATCTTGACCGCTGGCTGCTG

CGCCTGCAACGCCATCTCGACAACCGCCGTTTCCTGTGGCAGTTGCCGTGGTATATGGTC

ATCGGCCCGGCGGGCAGTGGCAAAACGACACTGCTGCGCGAGGGGTTTCCGTCCGACATT

ATTTATGCCCCGGAGGGCGCACGCGGCGCAGAACAACGCCTGTACCTCACGCCCCATGTC

GGTAAACAGGCGGTGATCTTTGATATCGACGGCACACTCTGCGCTCCCGCTGATGCGGAT

ATCCTGCATCGCCGTCTGTGGGAACATGCCCTCGGCTGGCTGAAAGAAAAGCGCGCGCGC

CAGCCGCTGAACGGGATTATTCTGACACTCGATTTACCCGATCTGCTTACCGCAGACAAA

CGCCGCCGCGAGCATCTGTTACAGACGCTGCGCAGCCGCTTACAGGATATACGCCAGCAT

CTTCACTGCCAGTTACCGGTTTACGTGGTACTGACCCGGCTTGATTTATTACAGGGTTTT

GCCGCCCTGTTCCAGTCACTCAACAGACAGGATCGCGATGCGATTCTGGGCGTCACGTTC

ACCCGCCGTGCCCATGAAAATGATGACTGGCGAACAGAGTTGAATGCTTTCTGGCAGACA

TGGGTGGATCGAATGAATCTGGCGTTGCCGGATCTGATGGTCGCTCAGACTCACACCCGC

GCGTCTTTATTCAGTTTTTCCCGCCAGATGCAGGGAAGCCGTGAACCGCTGGTGTCACTG

CTTGAGGGTCTGCTTGATGGCGAAAATATGAACGTGATGCTGCGTGGTGTCTATCTCACC

TCTTCGCTTCAGCGTGGACAGATGGATGATATATTCACCCAGTCTGCCGCCCGCCAGTAC

CGGCTGGGCAATAACCCACTGGCGTCCTGGCCCCTGGTGGACACCGCGCCTTATTTCACC

CGCAGCCTGTTCCCGCAGGCATTACTCGCAGAGCCTAATCTGGCAACAGAGAGCCGCGCC

TGGCTGATACGTTCCCGTCGCCGCCTGACGGTTTTCTCTGCCACAGGCGGCGTGGCAGCA

CTGCTGCTCATCACCGGCTGGCATCACTATTACAACGGTAACTATCAGTCCGGCATCACC

GTGCTTAAGCAGGCCAAAGCCTTTATGGACGTGCCGCCTCCGCAGGGGGAAGATGACTTT

GGCAACCTGCAACTGCCGCTCCTGAACCCGGTACGCGATGCCACACTGGCCTATGGCGAC

TGGGGCGACCGCAGCCGTCTGGCCGATATGGGACTGTACCAGGGACGACGTATCGGGCCT

TATGTGGAACAGACCTATCTGCAACTGCTGGAGCAACGTTACCTGCCCTCGCTGTTTAAC

GGGCTGGTCAAAGCGATGAACGCCGCGCCGCCGGAGAGTGAAGAAAAACTCGCGGTGCTG

CGCGTAATGCGAATGCTGGAGGACAAAAGCGGACGTAACAATGAGGTGGTGAAGCAGTAT

ATGGCAAAACGCTGGAGCGAAAAATTCCACGGCCAGCGCGATATCCAGGCACAACTGATG

TCCCATCTTGACTACGCGCTGGCTCATACTGACTGGCATGCAGAGCGTCAGGCGGGCGAC

GGTGACGCCATCAGCCGCTGGACGCCATATGACAAGCCCGTGGTATCAGCACAGAAAGAA

CTGAGCAAACTGCCTGTCTACCAGCGGGTTTACCAGAGCCTGAAAACGCGGGCGCTGGGC

GTTCTTCCTGCCGACCTCAATCTGCGTGACCAGGTAGGGCCAACCTTTGACCAGGTGTTT

ACATCTGCCGATGACAACAAACTGGTTGTTCCACAGTTTCTTACCCGTTACGGCCTGCAA

AGCTATTTTGTAAAACAGCGCGATGAACTGGTTGAACTGACGGCGATGGATTCCTGGGTA

CTTAACCTTACCCGCAGCGTGAAATACAGTGACGCCGACCGTGCGGAAATCCAGCGCCAG

TTGACCGAGCAGTATATCAGCGACTACACCGCCACCTGGCGGGCCGGGATGGACAATCTG

AATATCCGCAATTTTGAGTCCATCGGACAACTGACCGGGGCGCTGGAGCAGGTTATCAGC

GGCGACCTGCCTTTGCAGCGGGCGCTAACCGTGCTGCGTGACAACACACAGCCAGGCGTC

TTTTCTGAAAAACTCTCTGCCAAAGAACGGGAGGAAGCCCTGGCAGAGCCGGATTACCAG

TTACTCACCCGCCTCGGGCATGAATTCGCCCCGGAAAACAGTACCCTGGCAGTACAGAAA

GACAAAGAAAGCACGATGCAGGCCGTGTATCAGCAACTCACCGAGTTGCACCGCTACCTG

CTGGCAATCCAGAACGCGCCTGTACCAGGGAAATCGGCGCTGAAAGCCGTGCAGTTACGG

CTTGATCAGAACAGCAGCGATCCGATATTCGCCACCCGCCAGATGGCAAAAACGCTGCCT

GCTCCGCTCAACCGCTGGGTTGGCAGGCTGGCTGACCAGGCCTGGCATGTGGTGATGGTG

GAGGCTGTTCATTATATGGAAGTGGACTGGCGCGACAGCGTGGTGAAACCGTTTAACGAG

CAACTGGCAAATAACTATCCGTTTAATCCGCGTTCTGCACAGGATGCCTCACTGGATGCC

TTCGAACGCTTCTTTAAACCGGATGGCATACTGGATACCTTCTACCAGCAGAACCTGAAG

CTGTTTATCGATAATGACCTGAGTCTGGAGGATGGCGATAACAACGTCATTATTCGCGAA

GATATTATTGCGCAACTGGAAACTGCGCAGAAAATCCGTGACATCTTCTTCAGCAAACAG

AACGGTCTGGGAACATCCTTTGCCGTGGAAACGGTATCGCTTTCAGGCAATAAACGCCGC

AGTGTACTGAACCTTGACGGTCAGTTAGTCGATTACAGCCAGGGCCGTAACTATACCGCC

CATCTGGTCTGGCCTAACAACATGCGCGAAGGCAACGAAAGTAAGCTGACGCTCATCGGC

ACCAGCGGCAACGCGCCGCGCAGTATCAGCTTCAGCGGGCCGTGGGCGCAGTTCCGCCTG

TTCGGGGCCGGACAACTGACCGGAGTACAGGATGGCAACTTTACCGTGCGCTTTAGCGTG

GACGGTGGCGCGATGACCTACCGTGTGCATACCGACACGGAAGATAACCCGTTCAGCGGT

GGGTTGTTCAGCCAGTTTGGTCTGTCAGACACACTGTACTGAGGAGGCAGGGATGAATAG

TAACGTACTGACACAAACTATCGTTACCGGCAGTGACCCGCGCGGGCTGCCGGAATTCAG

TGCCATCCGCGAGGAAATAAACAAAGCCAGCCACCCGTCACAGCCTGAGCTGAACTGGAA

ACTGGTGGAGTCGCTGGCACTGGCGATTTTTAAAGCCAACGGTGTGGATTTACACACCGC

CACCTACTATACGCTTGCCCGGACACGGACACAGGGACTGGCGGGATTCTGCGAAGGTGC

GGAACTGCTGGCGGCAATGGTAAGCCACGACTGGGATAAGTTCTGGCCGCAGGGCGGCCC

GGCGCGTACTGAAATGCTGGACTGGTTTAACTCCCGAACCGGCAATATTCTGCGTCAGCA

AATCTCCTTTGCGGAATCCGACCTACCACTGATCTACCGCACAGAGCGGGCATTGCAGCT

TATCTGCGATAAGCTCCAGCAGGTGGAACTGAAGCGCGTTCCGCGCGTGGAGAATCTGCT

CTATTTTATGCAGAACACGCGTAAACGGCTTGAACCCCAGCTGAAGAGTAACACTGAGAA

CGCCGCACAGACCACGGTCAGAACGCTGATTTATGCCCCGGAAACACAGGCATCTTCCAC

ACCAGAAGCGGTAGTGCCTCCCCTGCCCGGCCTGCCTGAGATGAAAGTGGAAGTGCGCAG

TCTGACAGAGAATCCCCCACAGGCCAGTGTGATAAAGCAAGGCAGTACGGTAAGAGGGTT

TATCGCAGGGATCGCCTGTTCAGTGGCTGTCGCCTCAGCATTGTGGTGGTGGCAGGTCTA

TCCGGTACAGCAGCAACTGTTACAGGTTAACGACACCGCTCAGGGCGCAGCAACGGTGTG

GATGGCCTCACCTGAACTCGAAAACTATGAGCGCAGGCTGCAACAACTTCTTGATACCTC

CCCGGTACAGCCGCTGGAAACCGGGATGCAGATGATGCGTGTTGCCGACAGTCGCTGGCC

GGAAAGCCTGCAACAGCAACAGGCCTCGACACAATGGAATGAGGCACTCAAAACCCGCGC

ACAGAGTAGCCCGCAGTTGCGTGGCTGGTTGCAGACCCGCCAGGACTTACATGCTTTTGC

AGATCTAGTGATGCAGCGCGAGAAAGAGGGACTAACCCTTTCCTATATCAAAAATGTCAT

CTGGCAGGCGGAGCGGGGACTGGGGCAGGAAACACCCGTTGAGTCTCTGTTGACGCAGTA

CCAGGATGCCCGTGCGCAGAAGCAGAATACAGATGCGCTGGAAAAACAAATTAATGAGCG

ACTCGAAGGCGTGTTAAGCCGCTGGCTGCTGCTGAAGAATAACGTCATGCCAGAGGCGGC

AACCGGTACCACGGCCGAAAAATAATTATTTAATTAAAGGAGATTATCATGGCAAATATA

AGTTATTTATCTTTGAGTGGAGAGACACAAGGGCTGATTTCAGCAGGTTGCTCAACGCTT

GATTCTGTCGGAAACAAAGCGCAGCCAGAACATAAAGATCAGATCATGGTTTATGCGTTA

ATGCATTCCATCTCAAGAAGTCAAAATGTCAATCATCATGAATTAATTATCACCAAACCG

GTTGATAAATCCTCACCATTGCTGGCAAAAGCACTTAGTGACAATGAAAAAATGGCAATA

TGTGAATTTATACTCTACCGAACCAGTAAAGCGGGTATTTACCAGCCTTATTATAAAATA

AATCTGTCAAAAGCCCGAATATCAAGTATTGATTTTGTCACACCGCATGCTGTCCTGGAA

AAAGAACTGGAACCACAGGAGAGAATTGCCTTTATTTATGAAGATATTTCCTGGGAGCAT

ACGTTAGCCGGTACGAATGCAATGAGTAAATGGCAGGATCGTGTACAGTAACTTACTGTA

ATAACATAATAAATTACTATTGCGGAGAGATAAAATGGCTGGTTTAAGGAATAACAACAA

CACACAGAATGCACAGTGGGCTGATTATGTGGGTGACATTCTTCGGGGGGCTCAGCCGAT

AAACCAGCTAGTACCTCAGCACCCTTATCTTAACGACGTCCCACTCATTGATGAGTTAAG

GCATCAGAACACTCATCATGTTATTCTCTTGACACTTGATGTTGCAAAAAAAATACTCAG

CCCAATAACATCATTTGATTACATTCATTTTATCACTACACATCCTTCAGGTATAAAAGA

TACACTCGCCTGGTTAGTTAACGCGGGTAAATTAATGACTGAGTTTGATGACAATGGGAA

AATTATATTTAACCTTAATGCCTTAAAGTATACAAAAGCAAGTTACTTTGAAATACTTGG

AGAGAAATATATAAAAATCACAACATCCAGCCCCTGGCTTTTAGAAAAGCTCGGTAAATA

TATTTTCTCTTCACGAGCGCCTCAAGTTCTGGAACTCGCTATTGGCTGGCGAGGAGCTTT

ATCTGAATCAATAAAAGGAGTTAAGTTCTGTATCTGGTTTTCAGTAGCCTGGAGAACCAT

AGAATTTATTATGAGTTCAGAGCGAGATCTGGTTAATTTTCTTGGCGATTTTTCAATGGA

TGTGGCCAAAGCAGTTATAGCCGGTGGTGTTGCAACCGCTATTGGAAGCCTGGCTTCTTT

TGCCTGTGTTAGCTTTGGCTTTCCAGTAATTCTTGTCGGAGGAGCAATTTTACTGACAGG

GATAGTGTGTACAGTTGTTTTAAATGAAATCGATGCTCAATGCCATTTATCAGAAAAATT

AAAATATGCAATTAGAGATGGACTAAAACGGCAACAGGAACTTGATAAATGGAAAAGGGA

AAACATGACTCCATTTATGTATGTTCTTAACACTCCACCCGTGATATGAGGATTAACCAT

GCGTTTACATGTTAAATTAAAAGAGTTTCTTTCGATGTTTTTTATGGCCATATTATTTTT

CCCTGCATTCAATGCTTCTTTGTTTTTTACCGGAGTTAAACCTCTATATTCAATAATAAA

ATGCTCCACGGAAATATTTTATGATTGGAGAATGTTGATTCTGTGCTTTGGTTTCATGTC

GTTTTCCTTTTTAAATGTTCATGTAATTTTACTTACGATAATAAAATCATTCTTAATCAA

AAAAACGAAGGTAGTCAATTTCGCCACAGACATAACAATACAGCTAACTCTTATATTTTT

ACTAATAGCTATCGTAATAGCACCTTTAATAGCTCCTTTTGTCACAGGATATGTCAATGC

TAATTATCACCCCTGCGGTAATAATACGGGAATTTTCCCAGGAGCAATCTATATTAAAAA

TGGCATGAAATGTAATAATGAATATATTTCTCGCAAGGAAGATTCAGCAGTTAAATAATT

AAATATTCTAAAACAAACAGTTTTTAACTCCGGATTCCATGTCCTTTCTTGCACTGTCTT

TGTCAAGAAAAATTTCTTATGCAAAGAATTTTGTATTATTGCCGCCAGAAATTCCTGGCG

GCAGATATAATTTATTATTGATAGCGGTTAACCAAATCTTTTACCATCGCTTTATAGGTC

TTTTGCTTAAGTTGCATGATTTGCTGCTCTGTCATATCAGTCGTACTGGCTTCATTCTTG

TCGGGCAATGGTGGAAGCACTTTATATTCATAATTCACCGGCGACCAGGTAGCCCACTCA

CCTGTTGCCACATCCACCAGCGTGAAACGTACCAGGTAGCGCAGGGAGATAGCGTCGGTG

AGTTTTTCATTTTTATAGTCGGACCATACTGTTGATTTCAGCGCAGAGTCATATTTTCCT

GTCTGCAATGTATCCTGGTAAACAATAATCGCTTTCTGATGTCCTTTTGCAGCCACAAAA

CGCAGTGCCTGCATCCAGTTCATATTCTCAGCACTGGCAACATCCTCGTTCTCATTTTTA

TCTTTGTTTTTGTTACAAGTCAGAGGCTTTTGCCTGTCCGGGATACCAGAGAATGTGGAA

ACAGTATAATATTTTCGCATCTCCTCCTGCATAATGGTTTCCGGTGCGCGGTTGCCGGAT

TGAACAAGTATTACAGGAGAATTAAGGGGAACGCGGAACTCATCTCCATCAAGCGCAGCT

TGAATATCCTCTTCGGATACGGCCAGAGTGGTTTCATTACCGAATAAATCTTTGTCTGTC

AGTTGCTGGGGAGTGTTTTTATTAATATTACTTTGTGTGACTTGAGCTTTTTTCTTCTTT

TCATCAATAGAAGATTCAGAGGCACATCCTGCAAGCAGCGAGAATAACACACATATGCAA

CAAAGCTTTTTTGAATTCATAATTGGACACTCCCTCGCCTGTCATAATCATGGTAATGTT

TAGCTAACGATTTTTAATTATATACTCCACTTGAATCAGAACAAACAAAAATAACAGTAT

ATATAAATTCATTAAATCAATAGAAAAATGAAAATCATAACATTCAAATATATTTAAATT

GAATGATTCGATAGTATGATTAAATATTAATGATATGGTCTACCATATGTGATTAACACA

TTTACAGCATAACAAAACCATAGACCGAAGAAATAGCGGGATTTAAATGCAAAAAAAACC

GCAAAATTAAAAATCTTGCGGTTCTCTGAACTCATTTTCATGAGTGAATTTGGCGGAACG

GACGGGACTCGAACCCGCGACCCCCTGCGTGACAGGCAGGTATTCTAACCGACTGAACTA

CCGCTCCGCGTTGTGTTCCGTTGGGAACGAGGCGAATATTACGGATTGCCTCACCCTTCG

TCAACGGTTTTTCTCATCTTTTGAATCGTTTGCTGCAAAAATCGCCCAAGCCGCTATTTT

TAGCGCCTTTTACAGGTATTTATGCCCGCCAGAGGCAGCTTCCGCCCTTCTTCTCCACCA

GATCAAGACGGGCTTCATGAGCTGCAAGCTCTTCATCTGTCGCAAAAACAACGCGTAACT

TACTTGCCTGACGTACAATGCGCTGAATTGTTGCTTCACCTTGTTGCTGCTGTGTCTCTC

CTTCCATCGCAAAAGCCATCGACGTTTGACCACCGGTCATCGCCAGATAAACTTCCGCAA

GGATCTGTGCATCGAGTAATGCCCCGTGTAGCGTTCGTTTACTGTTATCTATTTCGTAGC

GGGCACATAACGCATCGAGGCTGTTGCGCTTACCAGGAAACATTTTCCTCGCCACCGCAA

GGCTATCGGTGACCTTACAGAAGGTATTGGTCTTCGGAATATCGCGCTTAAGCAACGAAA

ACTCGTAGTCCATAAAGCCGATATCGAACGCTGCGTTATGGATCACCAACTCCGCGCCGC

GGATATAGTCCATGAACTCATCGGCTACTTCGGCAAACGTGGGCTTATCGAGCAAAAATT

CATCGGCAATACCATGTACGCCAAAGGCTTCCGGATCCACCAGCCGATCGGGTTTGAGAT

AAACATGGAAGTTATTGCCCGTCAGGCGACGGTTCACCACTTCAACGGCACCAATCTCAA

TGATCTTGTGGCCTTCATAGTGCGCACCAATCTGGTTCATACCGGTGGTTTCGGTATCGA

GAACGATCTGGCGTGTAATTGCAGTGCTCATAGCGGTCATTTATGTCAGACTTGTCGTTT

TACAGTTCGATTCAATTACAGGAAGTCTACCAGAGATGCTTAAACAGGTAGAAATTTTCA

CCGATGGTTCGTGTCTGGGTAATCCTGGACCTGGGGGTTACGGCGCTATTTTACGCTATC

GCGGACGCGAGAAAACCTTTAGCGCAGGCTACACCCGCACCACCAACAACCGTATGGAGT

TGATGGCCGCTATTGTCGCGCTGGAGGCGTTAAAAGAACATTGCGAAGTCATTTTGAGTA

CCGACAGCCAGTATGTCCGCCAAGGTATCACCCAGTGGATCCATAACTGGAAAAAACGTG

GCTGGAAAACAGCAGACAAAAAACCAGTAAAAAATGTCGATCTCTGGCAACGTCTTGATG

CTGCATTGGGGCAGCATCAAATCAAATGGGAATGGGTTAAAGGCCATGCCGGACACCCGG

AAAACGAACGCTGTGATGAACTGGCCCGTGCTGCGGCAATGAATCCCACACTGGAAGATA

CAGGCTATCAAGTCGAAGTTTAAGCCTGTGGTTTACGATATTGCCGGGTGGCTCCAACCG

CCTGGCGAATTCGTGGCTTGTTTTTACTCTGTTTCATCGGATTTAGCGTTAAAGGAATAG

TCCGTTTCCGGGCAACAATAAGTTGTAAGCAACCAAGCGCAGGAATATGTGCATTCAATA

GTTTTCCACCGTGTTTGTTCCACGGGAGAACGTGGAAACGGCTGGCGTGCAGCACTTCAA

AATTCAACAAAGAGAGCCAGTCCAGTTGCCGCATCAGAGTAAACATCCGGCTGTTATAGG

GCGAGGTTTTTCGCAATACCGGCACAAGTTTGCGTAATCCCATTAAACTAATGGGATTGA

AGCCACTAATCACCAGCCAGCCATCATCAATCAGTACCCGATCGGCTTCACGCAATAAAC

GATGCGGATCGGTGCACCACGGCAAGGTATGTGCCAGTAGACAAACATCAACGGATTTAT

CGGCAAAAGGAAGATGAAGTGGATCTGCCTGCACCTGGACGGGCATTCCTTGCGCAGAAA

CATTCACTTGATGAGAAACCGCGCACGCTTCGCAATTGATTTCTGCGCTTAAATTGCCAA

TCTTAAGCAGATGAAAACCATACATTTTAGTGAACCACGGGTTGAGCTGGCGCTCCAGCG

CCTTGCGATAAAGCTCTCCCCAGGGCAAATCGCCCCAGCAATCAGGAGCCACGACAGTTT

GAGGGACTCTTGCCGGTTTCATCACAACCTTCCGTTTCACACTGAGAGGTAATCTATGAA

TCTTAACAGTATTCCCGCCTTTGATGACAATTACATCTGGGTTTTGAATGATGAAGCAGG

TCGCTGCCTGATTGTCGATCCCGGAGACGCAGAGCCGGTATTAAAAGCCATTGCCGCCAA

TAACTGGCAACCAGAGGCCATATTTCTCACCCACCATCACCACGATCACGTTGGCGGCGT

AAAAGAACTGGTGGAAAAGTTTCCGCAAATTGTGGTGTATGGTCCACCAGAGACACAAGA

TAAGGGAACAACACAGGTAGTCAAAGATGGCGAAACTGCCTTCGTTTTGGGGCATGAATT

TAGTGTAATTGCCACGCCGGGTCACACTTTAGGACATATCTGTTACTTCAGTAAACCTTA

TCTATTTTGCGGCGACACGCTGTTTTCTGGTGGGTGTGGTCGGTTGTTTGAAGGGACAGC

ATCACAAATGTATCAATCACTTAAAAAGTTAAGTGCGTTACCTGACGATACATTGGTATG

TTGTGCTCATGAATATACGTTATCAAATATGAAGTTTGCTTTGAGTATTCTTCCGCACGA

TTTGTCCATAAATGATTATTATCGTAAAGTTAAGGAGTTACGGGCAAAAAATCAAATAAC

ACTACCCGTAATTCTGAAAAATGAGCGGCAAATTAATGTTTTTTTAAGAACAGAAGATAT

TGATTTAATTAATGTAATTAATGAAGAAACATTATTGCAACAACCTGAAGAACGTTTTGC

ATGGTTAAGGTCAAAGAAAGATAGGTTCTGATAAAACTTTCTTGTCATCGGCTCCGTTCG

CCGTTATGATCGGTCGTCTTTTAAGCAACTATTGACACACACATGAAGGCAAAAGCGATA

TTACTCGCCTCTGTCCTGCTCGTGGGTTGCCAGAGTACCGGCAACGTACAACAGCACGCA

CAGAGCCTTTCTGCAGCTGGTCAAGGGGAAGCAGCAAAGTTTACAAGTCAGGCACGATGG

ATGGACGATGGGACGTCTATCGCGCCAGATGGTGACTTGTGGGCTTTCATTGGCGACGAG

CTAAAGATGGGAATTCCGGAAAATGACCGGATTCGCGAACAGAAACAGAAATATTTACGC

AATAAGAGCTATCTCCACGATGTAACTTTACGGGCAGAGCCGTATATGTACTGGATAGCC

GGGCAAGTTAAAAAACGTAACATGCCTATGGAACTGGTACTACTACCCATAGTGGAGAGC

GCTTTTGATCCTCACGCAACGTCTGGCGCCAATGCCGCAGGCATCTGGCAGATCATTCCG

AGCACGGGGCGCAATTATGGTTTGAAACAGACCCGCAATTATGACGCGCGTCGCGATGTT

GTTGCTTCAACAACTGCCGCGCTGAATATGATGCAGCGTCTGAACAAAATGTTTGACGGC

GACTGGCTTCTGACCGTAGCGGCTTATAACAGCGGCGAAGGTCGGGTCATGAAGGCAATT

AAAACGAACAAAGCGCGTGGGAAATCCACGGACTTCTGGTCGTTACCGTTGCCGCAGGAA

ACGAAGCAGTACGTGCCTAAAATGCTGGCATTGAGTGATATTCTCAAAAACAGCAAGCGT

TATGGCGTACGTCTGCCAACGACCGATGAAAGCCGTGCTCTGGCGCGTGTGCACCTGAGC

AGCCCGGTTGAAATGGCGAAGGTTGCAGATATGGCGGGGATTTCCGTCAGCAAGCTGAAG

ACATTCAACGCTGGCGTGAAAGGCTCCACGCTGGGCGCAAGTGGTCCGCAATACGTGATG

GTGCCAAAGAAGCATGCAGATCAACTGCGTGAATCTCTCGCTTCAGGCGAAATTGCTGCT

GTACAGTCGACGCTGGTTGCCGACAATACGCCGCTTAACAGCCGTGTTTACACCGTACGC

TCTGGCGACACGCTTTCAAGTATCGCTTCACGTCTCGGCGTAAGCACCAAAGATTTGCAG

CAGTGGAACAAACTGCGCGGATCTAAGCTGAAGCCAGGCCAAAGTTTGACGATTGGTGCA

GGCAGTAGCGCACAGCGACTGGCAAACAACAGCGATAGCATTACGTATCGTGTGCGCAAA

GGCGATTCGCTTTCAAGCATTGCTAAACGCCACGGCGTGAACATCAAAGATGTGATGCGC

TGGAACAGCGACACTGCGAATCTGCAACCAGGCGATAAGCTGACGTTGTTTGTGAAAAAC

AACAACATGCCAGATTCCTGACAAACCAGATAATAAAAAGGCACCGATTCCCCCGGTGCC

TTTTTTATTTATGCTGCTTTATGTGCTTCTACCATGATGATATCACTGGTGAAAGAGCCA

TCATTCTGCAAGGCAAAATACGTTCTCACCTCTGTCGATGCGCTCTGTTGGTAAATGCGA

ATAGCGTCTACTAACGCTTCTGGCGTACGCATTCTCGCGACCCATGAAGAAAATTCCAGC

GGTAACTTATCTGTAATTAAATTATCAACTATCAGATTGGCTTCATTGATTAACGTCAAC

CACTCACCGCTGGCGTAGTTTCGTACGTGAGAGGTATCGCGTAATGCTTCTACCGTCTGT

AACCAGATGTCGCGCACTGGGTGGCCCGGAGACATTACGTCCATCACAATCAGCCTACCG

CCAGGTTTCAATATCCGGTTCACTTCACGCAGTGCTGCACCAACATCATGCCAGTGATGG

GCAGAATAACGGCTGATAACAATATCAAATGCGTTATCGGCAAATGGCAGACTTTCGGCA

TAACCCTGGCGGGTGGTGATATTTTTCAGTTGCCGGACTTCGGCAGCTTGTGCCACGACA

TCCAGCATGTGGGCAGATAAGTCATACGCCACCACCGTGCTCACGTTTTGCGCAGCGACA

AAGCTGGCATGCCCTGCTCCGCAGCCCATATCAAGTACACTTGCACCAGGATAATCAGCC

AGACGCACCGCCAGGCGCTGTAAATCTCGTCCGGATGCATGTACGGTACTGGTCAGATAT

TCGCAGGCTTGAGAGCTAAACTGCTTTTCTACGTGGTCATGGTGGGATTGTGTTGTCATT

GCGCTGTCCTTTTGTTGTTTGAGTATAAAAGGACAGCGCCAAACGTTGGTCTGCCCTGTG

GCAGACCTGACATACCTTATTTATCAGGCTTGCCGGGACTGAATTCAACGAGTAGCGGAT

TGTGATCGGAAGCGCGCGTAACCAATACAGAAGCTTCGCTGACGTTCAGACCACGGTAGA

AAACAAAATCGAGCGGGCGGCCAAACGCCCGACGGCGCTGATCATCGGTAAAACGCACCT

GGCGCAGCGACATTTCCCGCGCAAAGCGATATAACGCGTTCATCCTTCTACGGCTCCAGG

CATTGAAATCTCCCGCCATAATGACCGGGCCGCTGTGGTGAGCTATCTGATCACCAATAG

GAAGTAACTGCTTACTATAGACATCCACGCCCAGACTGAAGTTGACGGCGTGTATATTAA

CCACCATCAACAGGCGGGTGTCAGGTAATGGATAGACCGTCACCAGTGCCGACTTCGCCA

GACGCAAAATGGGTTCTCGTTCACGTAACGGGCAGCAATACACTGGATGCGCCGCCGAAA

GGGTCATTACACCGGAAGGATGTTGTGGCAGCACGAAAGCGGGCACCTGATCGGCGGCAA

GATAGTTAGCGGTCGCAAACTGTACTAACTCTGGCGTTGTCTGCGCTTCCTGCAATAACA

CCAGATGTGCATCTTTGCCGTAGTTCTTTAATACCGACAACCATTCAGCGCGTTGCTGTT

TGTATATGTTCCACACCAGGATCCGAATACGCTCTTCGGTACTTAACGGTTCTCCAGGTG

GTAATGCCTGGCCGATGCTCGCAAAAGACCCCGGCGGTAAGATCCTTTCCGCAGGTTGTC

CGGCAACATAGCGCATGGCATAGGTGTTTTTTCGCACTTTTGACTTTGAAACCTCTATTA

CGTCAACCCTTCCGCACTCGGGAGGGTTCTACTGTTATAGGGATTTTAGCTCACTCTTTC

AACGAGCAATTGTATATTGTTATGTAAGCAAGTGCTTACACAGGTCAGAATTTTGCTCAT

TATTGAGAACATTAAATCGGATGACATATCACGCATCCTGATGGTTTAATGACAAATAAA

TTCAAAATATCTCTTCTATTTTGCAACAGGAGCAAAAATGAAAGCCACGTCGGAAGAACT

CGCCATTTTTGTTTCGGTCGTCGAAAGCGGCAGCTTTAGCCGGGCAGCGGAACAATTAGG

GCAAGCAAACTCAGCGGTAAGCCGGGCAGTGAAAAAGCTGGAGATGAAACTTGGCGTTAG

CCTGCTTAATCGGACCACGCGACAACTTAGCCTGACGGAAGAAGGCGAGCGTTATTTTCG

TCGCGTACAGTCAATTTTGCAGGAGATGGCAGCGGCAGAATCAGAAATTATGGAGACGCG

TAATACACCGCGTGGACTGTTGCGCATCGATGCCGCAACTCCAGTGGTGCTGCACTTTCT

GATGCCGTTGATTAAGCCTTTCCGTGAACGCTATCCGGAAGTCACTTTGTCGCTAGTCTC

CTCCGAAACGATTATTAATTTGATCGAAAGAAAAGTTGATGTCGCGATACGCGCCGGTAC

GTTAACGGATTCCAGCTTACGTGCCAGGCCGTTATTTAATAGTTATCGAAAAATTATCGC

CTCCCCCGATTATATTTCCCGCTACGGGAAGCCAGAAACGATCGACGATTTAAAGCAACA

TGTTTGCCTGGGATTCACTGAACCCGCTTCCCTCAATACCTGGCCGATAGCCTGTAGTGA

TGGACAATTACATGAGGTGAAGTACGGTTTGTCATCCAATAGTGGGGAAACACTGAAACA

GCTTTGCCTGAGTGGCAACGGGATTGCGTGTTTGTCCGACTACATGATCGACAAAGAAAT

CGCTCGCGGAGAATTGGTGGAGTTAATGGCAGATAAAGTGTTGCCAGTGGCAATGCCATT

CAGTGCAGTCTATTACAGCGACCGTGCGGTAAGTACGCGCATCCGGGCTTTTATCGATTT

CCTTAGCGAGCATGTAAAAACAGCTCCCGGAGGAGCTGTCAGAGAGGCTTAATCCCATTC

AGGAGCCAGACCTTTCGGGCTAACCAGGCGGTCGTTGCAATCCAGGGCGGCGATCGCTTT

TTTATCTTTGGCATCGAGCTGTAAATTTTGTGCCTTAAGATTACTTTCCAGGTTTTTACG

TTTAGTAGAAGAAGGAATTACTGAGTAACCTTCCCCCATAGCCCACGCCAGAATCACTTG

TGCCGGAGTCGTATTGTGTTTAGCTGCGATACGAGCAATAACCTCATCTTTCAGGGCCTT

ACCATACGCCAGCGTCATATAGGAAGTAATATGGATGCCGTGCTGTTTAGCCCAGGCAAC

CACTTTACGGTTTTGCAGATAAGGAGAGAGTTCAATCTGGTTAGTAGCGATGTTTTCAGC

GCCAACAGCAGCAATCGCCTTTTCCATCAATGGGATCGTGAAGTTGGAAATACCGATCTC

ACGCGTCAGCCCTTGTTTTTTGGCTTCCAGCAGCGCCTGCATAAACTCTTCAACAGAGAC

TTCATCGTTTGGTGACGGCCAGTGGATTAGCGTCAGATCAACATAATCGGTACGCAATTT

TTGCAGGCTCTCTTTCAGACTTGGGATCAATTTGTCTTTGCTGAGATTTTCAATCCAGAT

TTTAGTGGTGATGTAGAGTTCATGACGTGGCACGCCACTTTCTGCAATCGCCTGACCTAC

TGCGGCTTCGTTATCATAGATTTGTGCGGTATCAATTGCGCGATAACCAAGTTCAAGCGC

CGTTTTCACAGATGAAATAACAACGTCGTCTTTCAGACGGAAAGTACCTAAACCAAATGC

AGGGATAGCCATAATATGCCTCTTTTAATGCTATTTTCGTTAACTGAGGTGATTATGGGC

TTCAGACTGTTGAGGAAAAAGAGCGTAAAATGCAGAGGATTTTTGCGATTCTGGCAATAA

TAGATATACAGACGAAAAAAAACCTCGAGCGTTAACTCGAGGCTTCTTAATAAGTGGCGG

AACGGACGGGACTCGAACCCGCGACCCCCTGCGTGACAGGCAGGTATTCTAACCGACTGA

ACTACCGCTCCACCGAATTCTTTTACAACCACCGGTTTTATGACCGGCTTACTGCTTAAT

TTGATGCCTGGCAGTTCCCTACTCTCGCATGGGGAGACCCCACACTACCATCGGCGCTAC

GGCGTTTCACTTCTG

>NODE_68_length_14614_cov_33.077255

TGTGGATTGCTGGTCCTTCAATGGTCGGGGACTTTCACCCCTTGATCTCTAACCGGTCTC

CCGGCGCACACTGTATAAATAAACAGTATACTCGTTAGGTGAAATGTTCAAGCGTTTAAT

GCCACTTTTCGCTAACCCATGCTCATGTTTAGATTGATCTTTTCTTCTCAAAGGACGAAA

TCCGCTATCACAGGGATACAGTCATTTTTGTGGTGATCAACACCTTTGATAAGAAACGTT

GCTACCTCTGGCGCTCCAGATTCCGCTCTTGGCACAGAGCGGACAATCTGAATGAGATGA

AGGTCTGCTTCGAGCGAACAGCAGAAGTTCGCGATTGTTCTCATAACGGAGTAAGACGCT

GCTGATATTAAGGTGTATTAATGGACAGTGTAGATCAACGATTACTGGCGCTTAACGCTC

AGATGAGAACGTTCACCGATTCTGCACGAACAAATTCAGAATGGGGGATTTGTTATCCCC

CTGGTAGATGCCTTGGTTAATGTTTATAGGCCAATTGAACTCGGAGCATCATTCTTGCCA

CGTCAGAGATGGTCAAAAATAGACCCTTTGCGTGGGATAAGGATCTTCTCATAAAGCTTT

GTTGCATAGCCATCAGTCATCCCTGAAACATAGTCGCAAATGACTCGCATACCAGCCTTC

TCGTCTAAGCTAATCTGCTGCTCGTAAATTTCCCTCGTTGAGGCAGGTAGAAACCGACAC

GGATCGTTAGCCAGCACACCGAAAAGCTCAACAATCAACTTTTGTCCCTTGAATTCAAGC

TGCTGTACATTTTCATGCTTAATTACTTTGTTTTCGACCAGTTTGAAAATTTTCAACCTT

AGTGCTTCGACCGCTTCCGGAAGGACCGCATTATATTTGAGCATGCCACATTTGAATGCT

GCATTCTTTGTATTAAGCTCAACACTTGTAATCATCAGGTGAACCAGCATCCCGATGCAC

TCTTTTCTCTTGTAACTTTTACCAAAAAGGCTATCCGCGACAGATTCACATGTTCCGGAA

AATGTTTTTCCATGGCAGTCAGTAAATAAGGTTTCATGTCCACTGAAATGCTCCATCCAC

ATTGCTCGTGTCACCATCCCGAGAGAAATAGCATCCTCCAAATCGTGCAGCGAATACGAA

ATTTCATCGGCAAGATCCATGATGGTTGTATCGAGAGCTTTATAAGAAGCTTTTTTATGA

TCGGATTTGGTTTCACCATCTTTAACGGAAGTAAAAAGCCTCCGATCATGTTCAGTAAAT

GGTGAGAGAGCAAATTCTACAATATCGCATTCTGAATCTAGATAGCATTTTGGAGGTTTA

AAATCAGATGACTTAAAGAGCCAGTTCGGCGATCCGATAGTGGCCGGGATACTGTCTTTT

TTAACCACTAGTTCCGAGTATTTAACCGGATATTTCAGTATGCCTAGCAGAAGTCTGCGT

GTAGGATCGAGTCCGTGTTCTAAGGTATATTTATCTAGTTTCGAGAGAATGCGAAGCGTC

TGGCCGTTTCCTTCAAAACCACCATAATCCAGCATACAATAGTTAAGAGCTACCTCACCG

CCGTGACCAAATGGAGGATGTCCAATATCATGTGCGAGACATACTGCTTGCATCAGATCG

TTATCTGGTAAAAATTGCGCTTCCTCTTTACCTTTATATATATTTTTTAGCTTAGCAAGA

AGACCTGAACCGATTTGGGCGACTTCCATAGAATGAGTCAGTCGTGTGCGATAGAAATCA

CTTTCACCCAGACCAAGAACCTGTGTCTTTGATTGCAATCGTCTGAAAGGAGACGAGTGA

ATCAATCGAGAAAGGTCGCGCTGAGCTTCAGATCGGATCTCCTCAACTCGAGGACTGTTG

GTGCCTCGTCTCACATCCCAGACGTTTATTTCACTTCGAGTCATATTATTCCTTATTTTT

TATGCAGCGCGGTGTTCCAACGTAACTAAATTAGCAAAATGACGTATATATTTATGACCT

AATCTTCAATAATCAATGTTGTGTGAACTTAGTAAGGTCCGCTCCTGGCACAAAGTGGAC

ATACGGACGCGAATGAAACCAGTGTCCCCGCCTCTCATCATTTATATTGGGCGAGATTTT

TAATAATACTTTTCTTCTCATTAAAGAGGCTTGCATACATTGATTCATCGAGCTTATTCT

TGAGCTTAAAGCGAGATTTACGTATTGATAATTTAGATACACCATCACTTAATGATGAAG

CAACTAATTTTGTATCTTCTGCGTTTTTTAGGTTCGATAGTAGCGTTAGGATCATATCAT

TTAGATCAAGTAACTCGCTATTTATACGTGTGGGTGATAGTTCTTTACCATCTAATTGAG

AGTTAATGGAATCAATTTTATTATTAATTCTCTCTATGGACCCAACGATTCCTTTTCTGG

CTTCAATACGAAGGATTTCACTCTTGTTTCTAGAGTTTGTCTGGAAAAGCATTTCTGAGG

ATAACATTGATGACGCACGATACATATCAGAGGCCAACTGCTTCACACTTTCTCTAAAGC

TTGAGTAATTTAATATTGCAGAACCGATCAATAAAATAATTGGACCATAAGCAGTTACCT

TTGCTTTAATTGAACCTTCAGTAAATTTAATTTCAATTAAAACATCATCAGATAAAAAGA

ATTTTATTCTTTTGTCAGCAAAATCCTCTATTTCGTTTCTAATTAGTGATAACTTTTCTT

CACGAATTACAGCACTTACCTGTTTCAACCATTCTGGCTCAACATGAACATATGACTCAC

ATAATATGTTGCTGTTTATATAATCGGCCACAATTTGGTCCTTGATACATTATCTTATCA

TTAGTTATTACCACGATTTTACATAAAAATCAACAAATTTAAAGTTAGAATATGGATTCC

TTTTTCCTGACATAGGCTTAAGCGCTTCCCATTAACATGAAAATGCTTTCGAATATGTGA

TGGAAGCCAGATTAATGCCGTCCGCTTTTGGTACAAGGCGGACAATTATGTGAGGCTCAG

AGGATGTGGTCTGCTTTGAGCGAACTGCGGAAGTTCGCAGATGTTTTTACATTTGATGAA

GGCATTACTAAAGGGAGGAGGGGTAGTCAACGGGTATCAGGTCTGGTTAGAATCTTTTTA

CAATTCGATTAAGGGAAAAGCTATGAGGCTTTACATAATAGGAAACGGATTTGACATTCG

ACATGGACTACCGACAAGATACAAACACTTTAAGTCGTATGTAGCAAAAAATGACAAAGA

ACTATATGACGCGATAGAAGAATACATACCTGCTGGAGACGAGTGGAATGAGTTAGAAAG

TGCTTTAGGTGAAATTGATTATGAACTTATCCTTCAAAACAGTGAGATGTTTTTAGTTAC

GTACAATACCGAAGATTGGAGCGATGCGTATCATCACGATTACCAGTATGAAGTAGATAA

AATAACACGGATGCTGTCAGCTCGCTTGAAGGAGCAATTCGCTGATTGGGTTAAAGGGAT

TAACATAGCCGATGCTTACAATTCTGAACAATACATCCCCCCCATACCAAGAGAAAGTCT

ATATTTTTCATTTAATTATACAAATACCTTGCAACAGATCTATGCCGTTCCAGACGCGCA

AATTATGCATATTCACGGCAATTGTAGTTACGATGAAGATCTCATACTAGGTCATAGTTT

TAGGGTGGAAAAGTCACTAAATCCATATATAGGACCAGATCAAGATATAAGAATAGCAGA

AGCATACGATAGTATAGACAAATACTTTGGTAATACATTCAAGCCCAGCGAAGACATAAT

TAAAGAAGAGAACGTTTTTTTCTCGTCGCTTAAAAATGTGGATGAGGTCATCGTTTTAGG

CCATTCGCTTGCTGAAGTTGACGGTGAATACTTTTCTGAAATAAATAAAAGCATCCAAAA

AAGTGCTCGATGGATAGTTGCTTTATATAAAGGTGAGGAAAAATCAGGCAGCTTAGAAGA

TTATGATGTCAGAGCCTCAAATATTTCTTACGTGCTGTATGAAGATATCTAAATGAGACT

TCACATTATAACTATAATTATGTAAAAATAAGGTTGGTAGATTGTACCTTGAGAAAAACA

GATAAGAGGCATGTTTAGTTATGGTAAATTATACTGAAGAATCAGCTTTTATTGAAAAGT

ACAAACCGTTTAGGAAATTTTGGACAGTTTTTTCACCTCATTTTGTAGCTCGACTGCATT

CACTTGCCAATATGATAAGGGGGGAAAATCCAACTCAAGAACCACCTTCTAATAATGAGG

ATTTTCTTACAGAGTATGAAGCTTGCCTCAAAAATTGGAAAGACGCACAGAAAATTATAT

CGTCTGAAATTGTTTTTCGGCTGAGAGATATAAAAAAATTAGAAGTTAAAAAAAACGAGC

ATCATCGAAACAAGGATAAAGCAAAGAAAGAAAAGTGTATTGATGAAATAAATTTAAAAA

AAATTGAAGTTCTTATTCTTCGCCGTTGTGTTGACTCACTAATTTGGAGCATTCTTGATG

AAGAACACTCGAGTTTGCGGCGTTTACCTATTAATGCAGTCAATGACAATCTATCAGAAG

ATAACATAATTGATTCTATGGTCGCAGCTGATCTTATCAATCAGGACAAACACGCCATAG

CAATTGTCTCTGATATGAGTACATTTGTTCATGTGGGGGATTTAGTCACCTTTAATCCAC

TGGATGGCTTCCAGCTTGTGGAAGTTAAAACAGGTAAAAAGAATAATGAGATTTATGAAG

CTGCCGAATTTTCTGTTATCTCAAAGTGTCCGCACTTTGAAGAAAACTTCAAAAACAATA

TGTCTGGCAATGATGTTAAGCAATTTAAACGCATAAAAAGGCAAGTCGTACGTGGCATGA

ATGTGCTGGAGGCGATTAATACTGGCGAGGGCTTTGACAACCTCCATCAGTCTAAAGTTA

AAATCGATGAAATAGATCTTCCGTCTGAATTCTATACCCACCGCTTATTTAAAATGTGGG

AGGTTATTCGTGGAGGAAAAAATTGGGCAATTGATACTATTGATGAATGTTTGTTCTTAG

GGATGTACCGTGATTCTGGAATGGGTTTTGTTGCCTTCAATGGATGGATGGATAGTATCG

GTATAAAAAGCCCTGTTGTGAATATAAACGATTCATTCTTTGACCCTTTGTCTCGGCCAT

TTATGAGTTTGCATCTGCCAACTGAAATGCTCTCCGATATCATGTCGGGGAAAATAATCA

TCGTAATGTGTTTTGACAATGAACTTTTTTTTCACCGTGCCAACAAAATGTACCCAAGTT

TATTTCTTCTTAGCAATGCGGAAAGCACAAAGCAACCGTTAGAAAATATTCTTCATGTTG

GTTCGCAAGGGATAGCTTCTTACGTAAATGGGCATGCCAGCTTTTTAGGTAATGGTATTG

AATCCCGAATCCTTTTTGATCAGCAACGACCCGACAATATTATTGAGTGGAGCTATGCTA

GAAGCGATCTCAAAAAGCAATATAAAGCATAAGTCCTAGGATGGGATTTCCCATCCCTAG

ATGGACTGACCCCGCCCCGGTAGACGATCCTGCCCTATAGTGAATAGCCACGGATAATCT

AGACACTTCCGGATCGTTGATAATATTGATTTTCGTATTCTGTTGGTGGAGTATCCCAGG

AAGGTGCAGAGCAAAACCTTGAGAAAACCGCAAAAAATGCGTTTTTTGCACACAGCATCC

CATTTTAATCTTTTATTCTGACCTTCCATAATGTCCGTTGTTGGCACTCAGCGGACATCT

CAGCTTTGCCTCACCCCGGAATAATTAAACTTAGCTTTGACATCCCGTACCAGCTGCTGT

TGATTCTATTTAAGGCATATTCACCACCTCGCCACATTGCGCAGGCAGCGGTTACGCATT

CTGGCAAGCAACCAGAGTTCGTTTGCTGTTGTAGCCATCCCAAGCATCGAGGTGTAAACA

GTCGCAGCCCGGCGCCACAGCTTTTTGTCTTCCAGCATCTTCGCCAGTGACAGTGCGTCC

TGGACTTTTTTCACATCTTCTTCAGATAATTGTGTTGCAGCCTGCGGCAGGGCAACATCG

GGAACCTCAACGCCTGCACCCACTCGATAGACGTACTGGCAGCCGTTATGGGTACGATGG

AGTTTTCCCGCGGCATGTAGCTGCCGCAGCAAGTTACCTGCTGTACTGGCTTGCAAGTCC

AGCGCATCACAGACATCCTGCAGGACGCATTCTGGCGTCCGGCTAACGATGGCAAGCACC

ATCTGCGCTTTGGTTACTTTGGTTTTTGATTGTTTGGTCATGGTCAAAACTCGTTTACTT

GGTTAAACCTGCAGCCTTGCGGCGTTTGTACTCTCCCATCAGAATCTGCGCTGGCGTCGG

CCCTGCTGGATGCCTCGGTGCTGCCAACTGCCGACGAATCGGGGGAATCGAAAACCCGTT

AGCCATGTGTTTGGTCCATTTCGTGAGTAAGTTTTCTGCCAGTTTTTTCAGCTCTCCCTC

CGTCAGGTTCCTCTCAACTCCAGTTCTGCGCATCTCAATGCAAATGTGATACAGAACATC

CTGTTTCCATGGGTATTTGTCGCTTCCCGAATATCGGTAAGACTCGTTTCTCCAGCGTTT

GTACTCCGCCATCACTGCATCGGATGTCAGACTGAACGGGTTAGCACCGCTGGCAGATAC

CAGCGCAACGAACTCAGCGAGATCCGGCGGCCATGTGCTGCCCGCGGCGCAACGCTCCAT

GCACTGCCGGCAAACCAGCGTAATCTGGGCTTCACTCATCGACCCAATCTGAGCGATCCA

GAGCTCTGATGGTTCCTCTCCGTTCTTCAGGATCCATCGGTTCGAAAAGATTTCGCCCAT

CACTTCCCATAGGCGCCACGCCGTTTCTACGGCCGTCTGTTCCTGCAACTCGCAACCGTT

GCTCACGGGCGGCTCGAATCTGTTGAACAGCTCTGGATGCTGCTGGCTCTGCTCGTACTC

CCACATGATCGTTACTCCCGTTCGCTGGTTTTTTCTGGCGGACTTCCGCACGGTTAAGAT

GTCTTGCTAGTTTTTGCTCCCACTGGACCTGGTGAAACGCCCTGCCTTCAACCTGCCAGT

ACGCGATGAAGCTGCTTAACTCGGCAGCAAGATTTATCCCCGGTCTTAATGGCATTCCCC

AAATCGTTGACAGTCGGGGAAAATCCTCGGAAGGTTTCCACCCGAAATACATCGCAAATT

TTCCGAATGCTTGTGTTTCACCAGGAACTATTCCCGGTTGATTCGGATAGTCAGGCACAA

CTGGTTCGACCAGAACCCTATGTGTGGGGGTTATATCTTTTGGTTCCTCTGGTAGATTCC

GGATCCCGTTTTTGGGATCGTTTGACGGAAAAAACGGGATCGTTTGGTTGTTTTGCGTAC

AGGAAACAGTCCCGTTTTCGGGTGCCTTTTCAGCTGTAACAACCCCGTTTTCGGGAATGT

TTAAACGATCCCGTTTTTGGTAATGTTCCCGTTTTTGGGTGTGTTCAATTTCAGCAACGC

TTTCTTCCACACCAAGAAGTCGGTAAACCGGGATTTGTTTAGTCTTTCCACGCCGTTCAC

CTGTATCTTCAATAAGCCCGATCGAGATCAGATACTGCAGGCTCGACTGGACCGTTTTCT

TATCCAGCTCAGTTGCTTCTGCCAGCGCAGGAATGGATGGAAAAGCACAGAGATCAGCTC

CGCACATGTCGGCCATCCAGGTCAGAACAGCTTTTGCAGAGGACTTCCCTGTCTTGACTT

TTTTGGCCCATCGCATTGCGTCAATGCTCATGAAGCCCCCCTATTTTCTGTACGGTACTC

ATTGTCAAAACTCGATTAAAAAAACTGTGGCGCTACGGCGCTTATGCTCGCCAGTAGTGG

TCCCGCCGCATCTGCAGGAAGCATGTTAAAAAGTGCAATTGCTGCCTCCCGAATTTCACG

TTCTAACTTTTGCAACGGAGCGCCAAGCAATTTTGCCTGGTGCGCTTCGCTACACTCTTT

GATTGCTTGAGCCACCAGCTCGCTTTCAGTCAATCCACGTTTCAATCCGTGTTTGCGCGC

AATCTCAATAGGCATTGCATCAGCGATCGCTCCTGAAAGCTGCATGACGTAACTGGTGTA

CTTCTCTGATCCAGATTCGTTTTTCAGGTAGCGGTACAGGTTTTGTTTATTAACGCTGAT

GCCGCGACCGTCTTGTTTCTCCCACTGTTCGGCCACCAGCTGTGCGACGTGCTCCTGCGC

GCGCCCGGGTAAGGTTGCCTCCCACTCACGAACTGCTGCAAAGATGGTCCGGCACTTAAC

GCTGTCCCGACGCCGTGGTGAATACTGATTTTCCGTTTTCTGTTGCATACCCAACATAGA

AGTATGATTTTTGAAAGATATGGTTTGCATGTTTAGTCCTTTGGAAGTCCGTCAGTCGGG

TTTGGGTAAAGATCGGGTCTAAGCTCATGAGGCGTCACTTGCCAATCCAGAACCCTGCAT

GCGTTGAGTACCTCAGTACTTGCAACCTGAGTTCGAAACCAAACCGATACTGTTTGAGAG

TTCTTCCCCAAACGGCGAGCTAGTTCAGATTGACTGCCACAAAGGGAAATGATTTTCTTT

TGAACCGTTTCTTGCATGTTTCCTCCTAAAAATTTGTCACATATTTGATAAATAATTTGT

CAATGTCAAGAAACTTAATCAGTCACAAGTGCTAAGAAACTTTGTATGCTTGGTTACTGG

TTTGATTTGGATGCGAATATGAACTTCGAAGAACGGCTGTTAAGAGCTCTTGATGAGGCT

GGTATATCTCAATCTGAGTTAGGCCGGCGAGTGGGTGTAAACTCTCAGACAGTCAGTAAC

TGGTGCAATACAGGTAACTTCCCGCGAAAGGAAAAGTTAGAGTTATTCCCGCAAGCACTT

GGAAAACCACTGTATTGGTTCTTTATGACGGATGAAGAAGAGTCTTCATTACAGGCTGTC

ACAGCCAGCAAAACAGTACTAAATCAGAAGCAATTAGAGTTATTAGAAGTATTTGATCAA

CTTCCTGAAGTGGAGCAGGACAGATTTATTGAACTAGCGAGAACGCGACTGGAAGAGTTA

GATCGGTTTATGGCTGAGTTCCTGAGTAAGCGAAAAATCCCCCCTCCATTCGAAAAAGAC

TAAATCTTGCCACTGAGAAGGCCGCTTACAGCGGCTTTTTTTATACCCAAAAATCACCAA

ATCTCACACAAAAACAATCATATCCATTTTTTGTGTCATAAAAACATTGATAACTGACAT

ATTTATTTGTAGTCTGATATTACAAATTCAGTCATCGAGGCAGGAAGCCCACGAAGTAGC

TGCCGGCGGCATACGAAACACCGGATGAGATGACGACAAGAAGAATTCGCAGCAGGTTAT

AACGTTCCGCCGGCCGGCGTTACAGGCATGAGATAGGGCATCACTATGAGAATAGATATA

TCCAAGATAGGGAAAATTTACTTTTTACTCGTCTCCCCAATCAAACTCTCTGTCGCGCAG

GATTTGGAGGCCCGATTCGGAGACCGCGTAATCATTGCAGCTTTTGGTACTGATATCACG

TCCATGGGCCTGGCACCAGGTGATGAAATCGTAAGTGCTGGCTACCACCTTCACAGCCTG

GATACCGCTGTTTTCGTAGCGCTCCACCATGCTATCGGTGCGGATACGCCAGTCGTGGTA

GTCAAAGGGAAGGACGTAAGCATCTGAAAGGATTTTTTGGAATTCTTCATAGTGAGCGGG

ATTTTCGTACCAGAAGACAGGTATAGGGCTACGAGACATTTTGCTCTCTTTTATTTGGCT

GTGTGAGAGCGCCAAGAATACCACCGAGCCTGAAGTGGTGAAAAGACAGGCATGACGACT

AGTAGGGTTTGCAATGCGGTGAATGCGGCTATGCGCACGCGACACAGTTAAAAAAGTAAA

CATGGCGGTTATTCACACGTTGTGGGGAAAAAGTTGTCGGCGGTAGTTGTTAACTGGCTG

CCGTCACCGGGAGGCATCCGGCGCCGCATTGCAAAACCACATCCTAATACTGAGTTAACT

GGAGATAACTATGAAGGATTTTGCCCGAGTACCTACCGGGAACCAGGCGACTCGCCTGAA

CTGGTTCGAGGTGAGACTACGCCAGCTGTGTTACTTGCTGGCGCAGAAAGGAAACCCTGA

GGCTGAAGCATGAATACCCTGTTTGCCCTTGTCATCAGCGTGTGTGCTCTCACTGGTGAA

TGCTCTGATGTTCTGATCGGTGTTTATCCATCAGAGGCCAGTTGCAACAGCAACGCCGAT

GAACAAAAAGTACAGGGCCAGTGTCTCCCCTACCGAAATGCACAAAAAATGGCTGACGAC

CAACGGCCTGCAGTGAGTTTTTGAATCGAGTTTTGACCAATGGCCGTTACGGCCGGAGAA

GTGATTATGGAATTTGGAATGAAACGCGTTCTGGCATCTGTCCAGGCCGCCGCCACTTTG

AATAAGCTCTATGACGGCTCGCCCGTTTCACTGACGGCCATCAGTAAAGAGTCAAAGCTG

TCTACTTCATACCTTGAGCAGATCTTCAAAAAGCTGCGGGCGGGTAACCTGGTTATTTCA

CAGCGTGGCCCAGGTGGTGGTTATAGCCCCCGCGGCGATGACATCACCGTTACAGAAGTG

ATCACTGCAGTATCTAAACTGCCAGCCCATAAAACTTTTGAGCCTATCCTGCGAGCGCTT

GACGACGTTCGCGTATCACAGCTGCTACGGGGCGATTCGCCAGCCCCATAAAGCACAAAA

CCCGCGCAAGGCGGGTTAAGTACCCGGTCAGCCGACCAAAGCTTTCCGGAATCGAGTTTT

GACCAATGACCACCACCAGGGCGGCTGCCATCAGCTGCCGGGTATCTTACAATCCAAAGG

AGCCCAAACGCAATGAACAACTACCCGTATCTCATTAAAGCTAAGGCAAAAGCAAACGAA

GCGAAAAGTCTCTTCTGCTGGTTCTCTGCTAAATCCGATTCTCGCGCCGAGCGCAAAATC

CTGGACATCCTGGAAGACGCTGAAATTAACGTTGGCCGCGGCGCCAGCCATCAGCTGCCG

ATCCGCACCAACTGGCTCATCGTTGATGACTTACCGGAAGAAGGTGTACTGGATGACACC

TGGTGCGATCGCTACGAGCTTGGTGGTGAAGACGGGCTGACATGGCAAAAAATCGTTGCG

CCGGCGGCTGCTGAACCACAGCCCCCCAGTAAAACAGAAAACGATATCTCTCCTGCAAAT

AGCGATGAAGAAGACTATTCGAACAATGAAGAAGCACTCTTCAACCTGGCGGAAATGTCA

TTCCGCACGCAGCTGCTTGCCCAGTATATGGCCGACGAACGTCACGTGTATCACATTAGC

ATTCCTCATCGTAACCGCCTTTCAGCGATGGAAATGGATACGGATAATCACGGTGTGCAG

AATCTGCTGCTGACGGCAGAAAATATTCCGGAACTTAAAAAATATGATATGCCTGGCCTG

TGGAAATTTACCAGTGCATTTAAGAGCGTATTTCCTGTGGGGAAACGCCATGAGCTCGGC

AAGCAAATTCAGTTCGCCAAATTGTGGCTTGAAACGTCGCACATTGACCGCGGGATCCTT

ACAAAGGAATGGGCTGCTGGAAACTATATCACCTCAATAAACAAAACCGATACCGGCGCC

AATGCTGGTGGCGGTAACAAAACTGACCGCAATCCGGATTATCAGCATTCGCTGGATACT

CTGGATATAGAGATCGCCCTTGCGACGATGCCTATGGATTTTGATATCTATAATTTTCCG

GCATCAGTCCACCGCCGCGCGAAGGAAATAGTACAGAAGAAAGAAAGTCCATTTAAAGAA

TGGTCTGCAGCATTACGGAGCACACCAGGCATCCTTGATTATTCCCGTGCAGCGATTTTT

GCACTGATCAGGGAAGCATCCAGTGGAATAACTCCTTTTCCAGATCGGTTGCGTGGCTAC

ATCAACGCGAATCTGACTGAACATAAGCATGATACCCCAAGCGCTGAAATGCTTGCCAAG

GCGGGACATATTCCATCTGCTGCAGTCACTCTGGATGCAATAAACCAAGCAATCGCCGGA

GAGGATAGCAGCGCAAAACTGGAAACACTCTCCTCTGACTTTAAAGCAGTTGGCACCGAA

CTCGTAAAAGAAGCTCAAAAGCAGCGTCCGAACGCTAATCAGGTTCTGGCCGCCGAGCGC

GGCGAATATGTCGAAGGGATTAGCGACCCTACTGATCCGAAGTGGGTAACCGAAGACCTT

CCCAAATCAAGGCAACCTGAGGTTTCAAAAATTGGGGACGGAGAATTTTCCATTGACGGT

CTTGTTGACGTTACTGGCAAGGTTAACCAAAAAGAAAAAACAGATGAAGTTGTTCATCAA

ACGGATGCTGTAGATATTGAATCCGGTCCTCATAATAAGGAGGAAGATCAGCCTATTGAT

TATGTTCACGTTATGGTTGATCTGGAAACCATGGGTAAAAAACATAACGCCCCTATCGTC

GCTATTGGTGCGGTTGTTTTTGACCCGGCAACCGGCTCTATTGGAGAAAGTTTCTATAAA

GTCGTATGCCTTGAATCCTCTGTGAATTGGGGCGCCGTAATCGATCCATCTACTGTTATC

TGGTGGCTTAAGCAGTCCTCCGAAGCACGCTCTGCGATCGTAAATGATGATGCTATCCCG

TTGCTGGATGCATTACTCCAGTTCAGAGAATTTGTCTCTGATAATGTTGCTGGCGGGAGC

AAAAAGGCACAGGTATGGGGTAACGGTGCGTCATTCGATAACTCCATTCTGCGTTCTTCT

TACGATTGCATTGCTGAAGATTATCCGTGGGAATACTGGAACGATCGGGACGTACGAACA

ATGGTAGAGCTCGGCCAGGCCATTGGCTTCGACCCCAAAACAACGATCCCGTTTGAAGGT

GATCGTCACAATGCCCTCGCTGATGCTATTCATCAGGCCCGCTATGTATCAGCAATCTGG

CAGCGAATAATTTCCGGCAATCAGGTGCTGCAAAAATTGATGCAAAACTGATTTTTTATT

TTCAGATACTGGCCCAGCAATGGGCCATAATGAGGTAAAACATATGCTCCAGATGTTAAC

CCTTGAAGAGTGGGCAAACGAGAAATACAGAAGCAATCCTCCAAGTGTTTCCACTCTCAG

GAATTATGCTAAACAGAATATGTTTTCTCCCCCAGCCAAAAAAGAAGGTCGATTCTGGCG

CGTCAGGGAGGATGCTGAGTTGGTCGGTACATTGACCACTCCTGTAGTAAAGAAAAGCGA

CCCTGTTCTTTTGCAGAGGATTTTGAACGATGGCTGCCAGACCACGTAAAAATAATATAT

CTATTCCAAATTTATACCCGCTCTACAGTAGAAAGGTTAATAAAGTATACTGGCGTTATA

AGCACCCGATAACTGGTAAGTTTCATAGTCTAGGTACAGATGAAGCAGAGGCCACGGCAA

TAGCTATTGAAGCAAATAAAAGACTGGCGGAACAACAAACCCGCCAGATAATGGCAATCA

CTGACAGAATATCCACCAACTCAGGAAAATCAATATCAACTAACACCTGGCTTGAACGTT

ACTGGAAGATTCAGCAGGAAAGATTAAAGTCCGGAGATATTAAAGAAAACACTATCAAAC

AAAAAGCAAAACCAGTATCTCTGCTTAAGGAACGTGTAGGAATGAAATTAATATCCGCTG

TCAATGTTCGAGATGTTGCGCAAATTCTTGATGAATATTTAGCGGAGGGACAACCCAGAA

TGGCTCAGGTCATTCGCTCTGTCCTAATAGATGTTTTTAAAGAAGCTCAGCATGCGGGAG

AAGTACCTCCTGGTTATAACCCTGCACTAGCAACTAAACAACCTCGTAGAAAGATCACTC

GCCAACGCCTCACTCTGGAGGAATGGCAAAAGATTTTTGATATAGCCGATGAAAATCACA

AATACATGGGGAACGCCATGCTTTTAGCCATAGTAACAGGACAGCGACTAGGTGATATAT

CCCGTATGAAATTCTCGGACATCTGGGACGATCATCTACACGTTGAGCAAGAGAAAACCG

GAAGCAAAATCGCTATACCATTAGCTCTGCGTTGCAACGCAATCAACTGGAGCCTCCGAG

ATGTAATCAGTCGTTGCCGGGATTATGCAGTAAGCCCTTATTTGGTTCATTTCTTTAGAA

CCACCTCACAGGCTGAGCGAGGAGCGCAGGTGAAACCCAGAACACTGACCATGAATTTCA

GCAAGGCAAGAGACAGTGCAGATATTGACTGGGGACAAGGTACACCGGCAACTTTCCATG

AACAAAGATCGCTTTCCGAGCGGTTATATAAAGCCCAGGGTATAAACACGAAAGATTTAC

TTGGACATAAAACTCAACAACAAACGGATAGATACCATGATGATCGAGGTAAGGGGTGGA

CAACGGTGGCCTTATGAGGTTTTTCGGGAGGGGTTTTGATAACTTATTTTGATAAAATTT

TGATAACCGTTCGAAAGCTAATAATAAAAACGGGAACCACCAGGTTCCCGTTCTGACATA

ATCTGAGGGCCAGATTACATGTTCGCGATAATCGCGTCGCCAAACTCTGAACATTTCAGC

AGCTTAGCGCCTTCCATCAGACGTTCGAAGTCATAGGTCACGGTCTTGGCGGCGATAGCG

CCTTCCATGCCTTTGACGATCAGGTCTGCGGCTTCGAACCACTGCATGTGGCGCAGCA

>NODE_70_length_4434_cov_31.574425

GCGCGAACTTCAAACAGCTGCGGCAGGACGGCGGGGTTGTTGATACCGCGCTGCAGACCT

GCCGCGAATGCGGCAGCGGACGTTTCCTGCGGCGGTAAGCCGGCGCCCACCAGCGAGTGC

TGAAGCAACAAATGATGCAATTCACCGGTCAAAACAGTACGAAAATCGTGAATTTGCCGG

CGATCGGCCAGTACCCACTTACAGTGGGTTCCCGGCATCACGTAGACAGATGAAGGGGCT

AAGGCGCGTGCGCCCAGCAGCTGCGTTTCTTCCCCACGCATGACGTTATGGTTATCGTCA

CGGGAAACGCAAAGGCCGGGAATTATCCAGATATTGTCGCCAACGGCAGTTAACTGCTGG

CCAATATCCGAGAAAGCGGCAGGAAGCGGCAAATAAGGGGCGATTTTCCAGCCCACGTTG

CTGCCGACCATCCCTGCCATCACCACCGGTGTGGCGCCATCGCGCCAGTGCTGGGTGATT

TCCGCTAACACCGCAGCGGGAGAGCGACCATTCAGGCGCGTTACGCCTGCTTCAGATTGC

CTGCTTTCCAGGCATTCTTCGCCCTGATAAAGCCAGGCGCGTAAATTCGTCGATCCCCAA

TCTATTGCGATGTAGCGAGCCGTCATGTGATTTCCTTAAGCCTTCGTGTCGAGCTGGCGA

TCATCGTCAACGCCGCCTGCTCCGCCGCGTCGCTATCCTGATGCCGAATGGCGTCAAATA

GCGCTTTATGTTCCTGGAGGGTTTTCGGCATGTTGCCTTCATCGCCCATCCAGGTCCGTT

CAAATACCGCCCGCTGCAGCGAACTGATCGCCACGCTAAGCTGCTGCAAAACCGGGTTAT

GTACTGACTGCAGCACCGCCTCGTGGTAGCGAATATCCGCTTCGTTAAAGGCATCCCGGT

TTTGGTTGTTGGCGATCATGTCATTGAGCGCCGACTCGATTTCCGCCAGATCGCTTGAGG

TGGCGCGTTCCGCCGCCCAACGCGCGATGGCGGGTTCAACCAGGTTGCGCACTTCACTCA

TCGCGCTGATAAGACGCGGGTCATAGTCATTTTCCAGTACCCACTGCAGCACCTCGGTGT

CGAGGTAGTTCCACTGGTTTCTGGGAGCGACAAACGCGCCGCGATAGCGCTTCATTTCAA

TCAGCCGCTTCGCCATCAGGGAACGAAACACTTCGCGGATGATGTTGCGCGAGGTTTCAA

ACTCCTCACAGAGTTCCGCTTCGGCCGGAAGCGCCGAACCCGGGACGTATTTACCGCTGA

CGATCTGTTTGCCCAGCGAGATCACAATGCGATCGGTCTTATTGAGAGTCATGGAGAGTC

CTTGTGCTCTATGTGTACTGCTCTACTTTACCGTCGCTGCTGAATTTCGCCTCATGTTTG

TACTACTAACGTGATGCTGTACGTTATCAACATGAGCGTAATGTAGTACAACATTATTGT

GTTGTACTACAATTTGGATCACAAAAAGAACAATTCATGAAAATTAAAGCGCAGCGGCCC

TGACAAGAGGCGATAAGAGAGAAAATTAAGGGGAGGAGGCGTTAAAACGCTTCGCCGACC

TGGAAGTAAAAGCCGCTGCTGCCATTGCCGATACCGTAGTCGAGGCGAACATTAACGCGA

GGTTTGAATTCAAAGCGGTAGCCAACGCCCGCCGAAGGCAGCCAGCGGCCATTATTCAGC

GACGACAGTGAGGGCCCCATGGTTCCCGCCCCGGCCCAGGCGACAATCCCGTGCCGCCAG

GTGAGCTGCCGGCGGTATTCCAGCTGGCCGCTGACGACCTTTTTATCCCGGTAGCGCCCC

TGGTAGTAGCCGCGCATCCGTTCATCGCTGCCGAGCAGCGGCATCATGCTCCACGGTACC

TCGCCCTGGGTGAAGGCGCCATCGGCCTCCCAGGCGAGCACGCTTTTCTCGCTCAGGGCA

TGATAATGGCTATAGTGCAGCTGAAATTCCTCAAAGCGGGTATCGCTACCTAATCCGGGC

GCATAGTGGGTATAGCGGAGGTTGGCATACTGACCCCGGCGCGGGTTAGGGACAAAGTCG

CGATCGTCCCAGTTGATATCGATGCTGGCGCCGGAGCTGAATACCGACGGTCCCTGTGGA

GTGTTTTCTATCTTCGGCCGATCGTCATGGTCCATCTCATCGGCATTCTGCGCCGCCAGC

GACCATCCCGCCCCGAGATAAACATGATCGATAAGCTGCCGATAAAGGGTGGGTCGCAGG

GTCAGTACCTGGGCGGTATACTTCTCTTTTTCATTGTCTTTATCCCCGGCATGAAAACCC

TGCCCCCAATAATAAGTGGGCGTGTTGGCTATCGACCCGTCGACAAAAACGCGCCACAGA

TCACGATCGAAAAAGGTGTAGTTTTTCACGCTGAGGCCAAAGGCGCCGGTAGAGCTGGCG

TAGCCGCTGAGCGTCAGGGTCGAGTTCTGGCTGGTGGTATCCTGCGGGTCGGGACGATAC

AGGCCGACGACAGCGGTGCCAATGCCCAACCCTAGTTCCGGCGTATAGAACGGACCGGGC

ATCACGCCCCAGTCGATGCCTTTGCTGGCGTCGAACTTATCGCTGGCGCCGAGATGCTGC

AGCCAGCCGTCGATTTTCTCGCGGCTGAGCGCCTCGGCCTGGCTGCCTGTCGGGCAGACC

ATCAGCAGCAGAAAAGTGATAAACAGTCGGCTCAAAAGCGATACTCGCCGGCAATAAAGA

AACTGTTACGTTCGGCAAAGCCAAACTCGGTAGTAATATTAAAATTCTGCGTCAGCTCGT

ATTGCGCGCCCACCAGAACGTTCCATGGCGACTGCAGATGCTGCTTCACATCGAAGCGAC

CGTTATTGTCCTGGTTGGCCAGATTAACCATATTCTGCAGCATCGGCGACGGCATCGAGA

GATCGCTGAGGCTGCCTTTAAACTCCTGCTGCACATCCTGATACATGCTGCCAACCCACA

GATTTAGCTTTCCGGCGGGGAGATGCAGCGCATCGACCGATGGCGTACTGAAACGATAGC

CAACGCGCGGCGAAAAGGTAAGCGCATCGATGCTGCCGTCGAGGATATCAAAGCGCGTTT

GCGTGTAGTTGGCGTCCAGCACGGTAAACCAATTGCCGACGCCGCCCACCAGGGTGGTGC

CCATCCCGTAGGTAGTACCTTTAAAATCGAGACGAAAGTCGAGATCCTGCATCCCCGGCA

GGGGCACCACTTTACCGTTCGGTCCCTTCAGGCCGACAGCTATCTGCGAAATTGAATGCC

CTTCGGTGTGCCCCACCAGGCCATAAACGTTCATAAACGGCAGCAGCCAGGCATCCAGCT

TGAGCGTCTCGGTTTTGCTGCTTTCCCGCGTATGACCAACGCCAATCTGGAAAGCGTTAT

CCAGCGAGACCGGCCCATTAGCGAAAATGTTATTCACGGCGTGCTTGCAGACAGGATCCT

TACCGCAATCGATATTGCGGCCATCCAGCGACAGCCCGGTGAAGTTAATGCTGTCGACAT

TAATATTCTGCCGCATATCCATATAGTTAATGCTGACGCCAAACGGCAGCGGCAGGACGT

AGCCGCGCTTTCTGGCCTCATCGCCTAGCAAAGGGAGTAGCGAGGACGATGCTGCGGCCG

CAGGCTGGCGACTTTCTGGCGCCGGCAGATCCGCAGGCTCTGCGCCGTGATAGGCATACG

CCGGTTCGAGCGGCGCCGTTGGTTCCGCGGCCGCGCAAATCTGAACAGAGGCGAATGGCA

GCGTAACCAACATCAAACGGTGGTATATATTCATGAAAAGTATGATGTTAGTTCTGAGTT

GCTAAAAAGAGGGCGGGTAGCTTATAGAATCCCCTGCAAGGATTGAGGGATTTAAATGCG

GATTAACATCTGTTCATGAAAAAAGAGAAGACAGACCCGGCGAACGCCGGGCCGGAAAGA

AGTTTACGCTAAAACGTATTTTTCAATGGCGAAGGCAACGCCATCTTCAAGGTTCGATTT

GGTGATGAAGTTCGCCGCTTCTTTGACCGCAGGAATGGCGTTATCCATTGCCACGCCGAC

GCCGGCAAATTCAATCATCGCGATATCATTTTCCTGATCGCCAATCGCCATAATCTCTTC

CGGCTTGATGCCCAGCGCATCGGCCAGCGACTTCACGCCAGTGCCTTTATTGACGCGTTT

ATCCAGTATTTCGAGGAAGTAAGGCGCACTTTTCAGCACGGTGTACTTCTCTTTCACTTC

CGCCGGAATACGGGCGATGGCCTGGTCAAGGATTGCCGGCTCATCAATCATCATCACTTT

TAGCAGCTGGATCTCAGGATCCATTTTCTCCGCTTCGCAGAACACCAGCGGAATGGTTGC

CACATAGGATTCGTGGACGGTGTAGTAGCTGATATCGCGGTTCGCGGTATACAGCGTATT

GCGATCCAGCGCATGGAAGTGGGAGCCGACCTCGCGGGAGAGCTGCTCAAGGAAGCGATA

GTCGTCATAGCTCAGCGCGGTTTGCGCGACGGTGCTTCCGTCACCAGCCTTCTGCACCAG

CGCGCCATTGTAGGTAAT

>NODE_71_length_1701_cov_59.236919

ATAATAGAAATATGTTCCATCAATTTTTTAAGTTCCATTTTGTTCTCCTTAATTATGTAA

GGAGTATTTGATCATGTATAAGCAATAAAAAACAGCTTCAGGTAATGAGGAATATCTCAA

TTTTTAAACATAAAATGCGAATTATTTAGTACAAAAAGTGAACTTTTGATGATCTTTCCC

TAATCTCACATAGGATCAGATCTCGTCTGATCGTTCCCCCTGCGCTCACTACCATGGCTC

TTTACCACAGCAGCCGGGGTTGTTTGGGACCGACTTCCGACAGCAGATCCCGGTGGGCCT

GCCACCATCTCTTCACAAGCTTATGCTTATTACATGCAAAACGTCCCGTTTTGCATCTTT

GTGCCTACGGCACACCGATGATCTTTCCCTGTGATCTTTCCCTGAATCTGCCCCTGAGAA

CCTGAATCAAACGTCTGACTCGCAGAACCATCTGTTTCTCGCGCTCTGTAGAACTTCATG

AAAAAGTCATCGGTGCTTTTATCGAAAAATACATGTTCTACTAATTGAAGTCATCATCAA

AAAATTTAATTAATCGAATCATACCTATAACCTTTTAATTTTACTTTTTTGTCTTCAACA

TTAAACACAAAAACCTCTTGGACAATTCTTTTTGAATATTCTGAGAAATATATCAATGTA

ATTTCATCGTTTGAAAATAATCCGCGAGTGATTTTTTCAGTTTTAAGGGTTGATTTTTTA

TAAGTCCCAAGATCTTTTTCTTTTGCTTCGTTCATTATGTCGATAAATTTTTTTTCAGAT

GTGGCAGTCTGAAAATCACTTGAAGTGATTTTATATATATCACTGTATTTCCCTGTCTGA

TATAAACCACGAAAGATATTAACTTCTTGTCTAGCTGGCTCTATGTCCACTGGAGAACAA

CCACACAATAAAAATAAAACTAAAAATATATATTTTTTCATATTTCCTCCTGTTAATTGA

CCCAGCATTCTTGCCACGTTCTACAAGCCAGAGTCATAACTGAAGCGTCAACACCTGCAC

CGATACCAACAGATTCTGTCGATGATTCTGGATTATCAACATCCACTACATAAGTATACG

CAAAATGCCCCCCAACTCCGCCGCCAACCGTTACACCTACTGAATTGCTGACTCCCGATG

TAGGTAAAGACTTGGTCTCAGAATATGTGATAGCCGCATTTATCCCACCACCAATTCCTG

CATGTCCGCATGCTGTAGCATAAATACAAATATCAGATAACATTTCACCTTTCTTTTTAG

CAAACGCAACGCCAAGTCCTGCATGACCACCTAATGATATTAGATCTCCACTGCCAGTAA

TATCAATTGATGATGTTCCATATGAATCATCATGCCAAACATCATATAATAATTGATATA

AATTATACAAACCCAAAGGATCCATCCTTATTATCGGATTCAGTGGGTAATTATACAGGT

TCCATCCCCCCGCCAGCCCAATGGGGTCTTGTGTAATATACCTCCCCTGTAGCGGGTCAT

AGTACCGGTTCCGGTTATAGTACAGCCCTGATTCCTCATCATGCTGCTGCCCCGGCAGAC

GGTATGGCTGGTGCAGGTAATACGGGTTCTCTTCATTAAGCTGGTTGCCCCATTCATCAT

ACTCCCCGCGCCACGCCGTATTGCCGTCTTCGCTGATGAGCGCCAGCGGCAGGCCCCGGT

GGTCGCAGTGGTAAAAATGAACTTTTCGCGCCGGTGTGTATTCCGGCTCCACCTGTCTGG

CCAGTTGCTCCACCGTCAGCCCGCACTGCGCAAGCCACGCCCGGC

>NODE_72_length_5139_cov_35.698383

CTCAAAATCGGTGGAGCTGCATGACAAAGTCATCGGGCACTATCTGAACATAAAACACTA

TCAGTAAATTGGAGTCATTACCCGGTCATTCAGGGGGATTATGTCCCGGAATATGAACTC

CGGGAAATAGCCCGACAAAATGGCACAGTGCGCACGAGGGTGCGCTTTCGTATTGAAGAA

GATCCTGAGTCAGGGGAACTGGTTTCCCGCAGCTATGAGGTGGGGGAAAAAAGCGGGCTG

GATCGGGTCCGGGTGCGGTTTGCAAAACAGCTGGATAAAGAGACATGGGGCTTTGAAGAT

CCTTCAATTAAAGGAACATTTGTCTGGTCCCGGTCTGCCGGGCAGGGAAAATTTGAGTGG

GGAGCCAGCCAGACGACTGTCCATGACGGGAGCGCTGGCGGCTCTACCACACCGCCTACA

CCCATTCCGGAACCGCGGAGCGTCTGGGGATTGCCTAACCCGGCCCCGGAATCGTTACCG

CCCGTACCGGGAACGCCGATCCCGGAGGAACAGGGACCAAATATTGAAACATTGCCCATC

GAAGACCGGGATTTCAATGACTTTATTATTGTTGACCCGATGGGGGGTGTCCCGGCAATC

TATGTTTATTTTCAGAAAGCTTCAGTTAGAGATTTAGAGGTTGACTATTACGGAAATTTT

GAAGGTCGTTCAAGGCAGGGCCTATATGAAGTGGATCATATTCCTTCAAAGGAAGCTGTT

AGGATATATTTGAAAGGGACATATCCAAACCTGAAAGATGACATTATAGAACAAATGACT

GACAGAGTGGCTGCTGTCGCTATACCGATAGAAGTACACCGGCAATGTAGTGAAACCTAT

GGTGGGAAAAACAATAGTAAATTTAGAACACAAGACGGAGGATTAGTCACTCAAAAAGTT

CTAGATGCCAGTAATTTAGAAGCTGCAGTTGATGCTAACTGGGATGTCAATGCTGAGTGC

CTTAGGAATGAATATGGTGTAAGTGATGAAAAAATTGAAGAGATCAGGGCCAAACTACAT

GAGTTAAACCGGAAAGCGGGGTTATATTAAATGAGCTTGAATGTTGAGAAGTTGATAAAG

AACCTTGGGAAATCGTATCTGGATATTTATGAGCAAGGATTGATCCCCTACAAAACAAAA

CCAAGTGGTACGGTTAGTGATGACATTTATAGATTAGATATGAAACGAGAGGGGGTATTT

TTATCATTTTTTAATAATCAAGATAAAAATCTTAAGGAGGTGACCTTAAGGTTAGAGGAT

GAGAATAAAACTGACTGGTTATTTCCTAACTTGCTGCCATTTGGTCTTGAACCAGTAATG

ACACAGCGATGGGTACGAGACCGATTTGGTCATCCGATTACTTACGTTGATGCCTGCGTG

ATTATGACTATTTATGTCGGGGTGGAGGAAACATATATTTTACCGACTCCGAATCAAAAT

ATTGCAGCGGCATTTTCTTACAATAAAGATTTTTTTGTTAACAGGATCACATTTATTCCG

GTTGAACAGGCGAAAGAAATCCAGTCTGCACTTGAGAAAAAACGACTTGGTGGCAAATGA

TCATTGACGTCGAAAAACTGGTAAAACAACTGGGTAAGCCTTATCATGAAATTTACAGTC

ACGGGTTGATTCCTTATAAAACAAAGCCTTACGGTCCTATTGATGAAGATGAAGCTGAAT

TAGATATGAAACGAGAAGGAATTCTTTTGGTTTTCACCAATAATTCCGAGAAAAATCTTA

CTGAAATTACATTAAGGTTAGAAGATAAAGGCAAAACAGACTGGGTATTCCCCAATCCGA

TGCCATTTGGTATGGAACCGGTGATGACCCAATTGTGGGTTAGAGAGCGCTTTGGGTTGC

CCATGATTTATGCTGATGCGGAAATCATCATGACTATTTATATGGGGGTGAAAGAGGTCT

ATGCTCTACCTACTCCTCATCAATATATCGCTGCCGCATTTACCTATAACAAAGATTTAT

TTGCAGAAACCGTGACTTTTTACCCACTGGAACGGGCCAAAGAGATTCAGGCCGTACTGG

AGAAAAAACGATTAGAGAGTTAATGAATCCTTAATGGTCCGGTCATGACTGGACCATTTT

CTTGCTCCATGAAGATAGTATTTAGCCGGATGTCGGGACGTGTGGTGTATTTATCAAATG

AGTATTGATGTCGAACAGCTTATTAAGAAAATTAGTCGACCTTATCAGGAAATAGTTGAG

CAAGAATTGATTCCCTATAAGAATAAACTGCATGGCCCGGTTGATGAAAATGAAGCCTAT

CTGGATATGTTGGTGGCAAATGAATATTGATGTCGAAACACTCGTGAAACAATTGGGTAA

AGATCATCAGGAAATTTATGATAGTGGACTAATTAAATATAAGACAAAACCAACTGCCAC

AGCGGGCTATGATACAGCTACATTAGACATGAAACGAGAAGGATTGTTTTTCTCTTTCGA

GAATGATAAAAATAAAACCTTCAAAGAAATTACATTAACATTAGAAGATGATGACATAAC

AGACTGGGTCTTTCCGAATTCAATGCCTTTTAATCTTGAACCGGTAATGACTCAAAACTG

GATGCGTGAGCGTTTTGGGTTCCCAATGATTTATGGCGAGCCTAAAACTATGGGGAGTTA

CAGTCGTGGTATCAGTGAAGTATACCCACTGTTACCACCTAATCAGAATATTGCTGTTTT

ATTTGTTTATGACGCCGACCTTTTTGTTGTTAGTGTGACTTTTTATTCTATGGCGCATGC

AGAAGCAATTCAGGCTGCGTCAGAGCGAAATAGATTAATGAATAAATAAGCGTTAATGTT

TTACTGCTTGTAAATGATGATTTTTTACAGAGCTAATTCATATTCCCTGATCTCTGTACT

GTTCCCGCAATGTTGACCACATTCTTAAGAAGAGCTGCTCCCCTAATGTGATCATAAGAC

CGATGAAATTGTTCTTTTTGCCCGTTACCGCATCACCACTGAAAAAGGCCCGGTATTCGA

AGGCCGGGCAGATGCTGAGGGGAAAACGGCCAGCGTTTATACCGCATTGCCTGAGTCAAT

AAAAATAGAGCTACTGTGAGCCATGGACAGGAGAAAGCCGGGATGACACAAATACTGGGA

CCCGGAGAGGGAAAAACATCATCAGCCGCAAAAGAGCCGGTTGTTGAACGTAAACCCGCA

CAGGTATTTTTTGAATCGATGGCGCTGGCCGCCTCAATGAGTGGTTATTATGCAGGGCCA

ACAGCCACAACGCTGGGAAATTCGCTTTCATTGGGGGCGGGGACTGCGGCAGGTGTCGGA

GAAGGCGTCGCGGGCGCACGGGTGCTGGCTGCGCCTAATCCCCTCACCGTTGCTCTGCTG

GCTATCTTCTATTCTCCGTCACTGAATGAAGGTGAGACGGAAACGCTACAAAATATACGT

GGCGACCAGCTCTATCAGAATCTGATCCATGGCCAGATGATGGTGGGCGCTTTTACCCGT

GTAAATTCAACGGTCATTGAGGGGGATTATGTCCCGGAATATGAACTCCGGGAAATAGCC

CGACAAAACGGCACAGTGCGCACGAGGGTACGCTTTCGTATTGAAGAAGATCCTGAGTCA

GGGGAACTGGTTTCCCGCAGCTATGAGGTGGGGGAAAAAAGCGGGTTGGATCGGGTCCGG

GTGCGGTTTGCAAAACAGCTGGATAAAGAGACATGGGGTTTTGAAGATCCTTCAATTAAA

GGCACATTTGTCTGGTCCCGGTCTGCCGGGCAGGGAAAATTTGAGTGGGGTTCCAGCCAG

ACGACTGTTCATGACGGGAGCGCTGGCGGCTCTACCACACCGCCTACACCCATTCCGGAA

CCGCGGAGCATCTGGGGGTTGCCTAACCCGGCCCCGGAATCGTTACCGCCCGTACCGGGA

ACGCCGATCCCGGAGGAACAGGAACCAAATATTGAAACATTGCCCATCGAAGACCGGGAT

TTCGATGACTTTATTATTGTTGACCCGATGGGGGTTGTCCCGGCAATCTATGTGTATTTT

AAGAAAGCCCCTGTGGAAGAGTATGAGGTTGACTATTATGAAAATTTTGAAGGCCGTTCA

AGGCAGGGAAAATATCAAGTCGATCATATTCCATCTAGAGATGCGGTTCGTGTATATTTA

GAGGATTTATATCCTGATGAGGGAAGTAAATATATAGATAAGATGGTTGATAAGGTTGCT

TCAGTTGCTATTCCAATAGCTGTTCATCAAAAATGTAGTGAAACCTATGGCGGGCGTAAT

AATCGTAAGGTAGAGACAGAAAGCGGCGAGATGATAACTAAAAAAGAGCTAGATGCTCGT

GACTTAGAAGCTGCCGTCAATGCCAACTGGGATGCGAATGCTGAATGCCTTAAGAATGAA

TATGGTATGAGTAACGAGAAAATCGAAGAGATCAGAGCAAAACTACATAAGTTAAACCGA

AATGTGGGGTTATATTAAATGAATGTTAATGTCGAAACACTGATAAAGCAATTAGGAAAG

CCATACCAAGAAATTTACAATAAAGGTTTGATTAATTATAAAACAAAACCTTATGGCTCG

GTTAGTGATAATACTGCCAGGCTGGATATGAAGCATGAGGGTATATATTTAGCATTTGTT

AATGATCTTGAAAAAAAATGAAAGAAGTAACATTAACGTTAGAGGATGAAAGCAAGAGTG

ACTGGTTGTTTCCTAATCCGATGCCTTTTGGTCTGGAGCCTGTGATGACGCAGCCGTGGG

TACGGGCGCGTTTTGGGTTGCCGATGATTTATGTTGATGCGAAAGTGGTTATGACGCTCT

ATAGAGGAGTAAAGGAGTTTTATCCGCTATTAGCTCCTGATCAAAATATAGTTGCGTCAT

TTAGCTATAATAAAGATTTTTTTGTTGAAAGTGTGACTTTTTATCCGCTGGAGCGAGCCA

AAGAAATTCAGGTTGCGCTGGAGAAAAAGCGACTTGGTCGCAAATGAATATTGACGTCGA

AAAACTGGTAAAACAATTGGGTAAGTCCTATCAGGAGATTCTTGAGAAAGGGTTGATTCC

TTATAAAACAAAACCTTATGGCCCTATTGATGAAGATGAAGCTGAATTTGATATGAAACG

AGAAGGAATTCTTTTGGTTTTCACCAATAATTTCGAGAAAAATCTTACTGAAATTACATT

AAGGTTAGAAAATAAAGGCAAAACAGATTGGGTATTCCCCAATCCGATGCCATTTGGTAT

GGA

>NODE_73_length_7134_cov_157.011917

GCGCCTGGTAAGCAGAGTTTTTGAAATGTAAGGCCTTTGAATAAGACAAAAGGCTGCCTC

ATCGCTAACTTTGCAACAGTGCCATTTATCGGCTGTCAGTTCTATGATCGTGAAAGCCAG

AAAGGGTGCAATTTTAGTCGTGCGATGCTGAAAGATGCCATTTTTAAAAGCTGTGATTTA

TCCATGGCGGATTTTCGCAATGCCAGTGCGCTTGGCATTGAAATTAGCCACTGTCGTGCG

CAAGGCGCAGATTTTCGCGGCGCAAGTTTTATGAATATGATCACTACTCGCACCTGGTTT

TGCAGTGCATATATCACTAACACAAATCTAAGCTACGCCAATTTTTCGAAAGTCGTGTTG

GAAAAGTGTGAGCTGTGGGAAAACCGTTGGATGGGGGCCCAGGTACTGGGCGCGACGTTC

AGTGGTTCAGATCTCTCCGGCGGCGAGTTTTCGACTTTCGACTGGCGAGCAGCAAACTTC

ACACATTGCGATCTGACCAATTCGGAGTTGGGTGACTTAGATATTCGGCGCGTTGATTTA

CAAGGCGTTAAGTTGGACAACTACCAGGCATCGTTGCTCATGGAACGTCTTGGCATCGCG

ATTATTGGCTAGTCTTCAGGGAGCGGTGAATATTCCGCCCCCTGCACAGCTTTTTACCCT

TCAGGCATCGCTGAAGAGTGGTGTGTGGAAATTTTCCACTCTTTACCGTCCCATGCATAA

GTGAATGTGTAGCGGGCTGAAACCGTTGATTTGTCCGCGAAGGTAAATGTGTAGGTACCG

GTGTCTATCGCCTTATTACACCCCAGGCGAATGGTACGCATGTCAATTTTCCCGGTCGGC

TTTTTCGCAAGAAAATGCTCGAAATAATCAACACGTTCAGCGTCCGTTAAACGCGCTTTA

TTGGATACAGTAGGCAACAATACCGCATCGCTAAGATAATTTTCAGATACCGTCTGCGCG

TTACCTGTTTTCAATGACTCGTTCCACTTATCAAATAGCGCTTCGATTTGCGCTTTATTC

ACCTTCACACAGTCTGGAGTCGACGCTGCAAAAACGGCTCCAGGCAATAGGGCAAGTGAA

ACAACAAGGCTCAGTAATTTATTCATACAATTCATTCCATTAGAAGTTAAATGGCAACAG

AAAACCGTTCATAACCAGGATCAAAGCCAAAATGCATTTAATAACCAATGGAAATCATCA

CCATAAATGGGTGAGAAGATTAAGATGCCATGAAGAAAAAATGGAATTAACATATTGAAA

TAATTATAGATACTTTAGCTATTACAACTCACATAACGTGTACTGCTTCCTGAATGATTA

TAGTTCAGCATTGATAGTGACACTCTAAATGCTCGCTCCACACTTCGTTATCGATGCCAT

ACTCCATCTTCCGAGCACACACTGATATCAATCAGTAAACAACGACAGGTACGCCCCCAC

GTTTATAGCAAGTCAGATGGGCCATGAAAATGCTAAGATAGTTAACAGAGTAGATTCAAA

GTGGATAGCAGGTATGAATTTTGACCATGTCGCGGTGTTGAACTCGCGCTTATCGAGCCT

GTTACTCCCAAAAACAAACGGTAATGGCAAATGTCATTAAGTATTAGTAAGATAGCCTCT

TTATATAATCCATTAAAATTATGCGCCTGGTTTTATCATCTCTGATCGTGATGGCTGGAT

TTCTGAGTGGTCAGGCTGCTGCTGCGCCTGAGCAAGCTCCGCACGCTGATATCCGTGACA

GTGGGTTTGTCTATTGCGTCAGCGGGCAAGTCAATACGTTCAACCCACAAAAAACGAGCA

GCGGTCTCATCGTCGATACGTTAGCGGCCCAATTGTATGACCGACTGCTTGATGTAGATC

CCTACACCTATCGGCTGGTGCCTGAGCTTGCTGAAAGCTGGGAGGTGCTGGATAACGGCG

CAACCTACCGCTTCCATCTGCGTCGTGACGTTCAGTTTCAGAAGACGGCCTGGTTCACCC

CCACCCGCAAACTGAATGCAGACGATGTGGTGTTTACCTTCGAGCGCATCTTTGATCGCC

ACCATCCGTGGCACAATGTGAACGGCAGCAGTTTCCCCTACTTCGACAGCCTGCAGTTTG

CCGATAACGTCCAAAGCGTGCGCAAACTGGACAACAACACCGTTGAATTCCGCTTAACGC

AACCGGATGCCTCCTTTATGGGGTATAGGAAGTATAAACCACCTTTTTGCTCCTCATCCG

AAGTATCTTACCTGAAATTCCCTCACTCGTTTACCGCTCAAGCCCCAATTTTAACTGCCG

GTCCAGCCTAAACCGCTCTAATAAGGTTCGATTTGGCGGTAAAATCTCTAGCCTGATAGC

TCGAGAGATACAAACTGCCCCACCGCCCCGTTTAAAAGTTGGCAGTGTTGAGCAGTGTTG

GATTTGGGGTCGTCAGTCAAAGAGACGACTCTGTGATGGATCGAACAGGCTGGGAGTCAG

TGGCGGCGCTCGTTCTGGTGGCAGCTCACGCTGCTTGGCGGCATTCGCCTTGGCTGTTTT

CTGTTTCAGATGCTTGAGAATCTGCTCAATGACCTTCGGATCTTCGATGCTGGCAATCAC

TTTGACGTGACCGCCGCAGTGTTCGCAGACTTCAATATCAATATTGAAGACTCGCTTGAG

GCGTTGCATCCAGGTCATGGCGCGGTGGCGCTCTGCAGGACTCTTGTCACGCCAGTTAGT

ATCGAGACCTTCCGATTTGTCGGGCTTCTTGCCCCGCTTGGCGGGTGTTACTTGAACTCG

GTGTTTGCTGTTCGGTGCAAAGACGCCGTGGAAGCGTGTGAGGTTGACTCGCGGCTTAGG

TACCAACGCAGCGAGTTTGGCGATGAAGTCCAGCGGCTCGAAGATCACATGGGTGGTGCC

ATTGCGGTACGGAGTTTTGAGCTCGTAACGCACCTGCCCATTGGCGGTTAATGCCAGACG

TTTTTCTGAAACCGCTGGCCGACTAATGTAGCGACACAAGCGCTCAAGCTTATCCCGCTG

ATGCGCTTCGGCCATCACACCGGCGTGTAGCGAGAAACCAGCATGGTTGGCTACTCGACT

GCTTGAGTCGGCTTTATCCTCACGCCCTGGCAAGGTTTGCAGGGTGAAGACTTTGCGCCC

TTGCTGGGGGCCGACGGCAATGCGATACGTAACCGAAGCACCATGTAATTGAGTCAGCGT

ATCGTCTTCGCCCTCTTCCAGTGTCAACCACGTATTCTCGGCATCACGCTCCAAAATCCC

ACGCTTTTCCATGCAGCGAGCGATGCGATGGCTGAGGGTGTGAGCGAGCGTATTCAGCTC

ATCGTAAGTGGGTGCCTTGACACGATGGAAGCGTTGCTTGCCATAGTCATCTTCGGCATA

GACACCATCGAGAAACAGCATGTGGTAGTGGACATTGAGATTTAGCGCGGAGCCAAAGCG

TTGGATAAGAGTCACTGAGCCAGTTTGTGCAGAGGCTTTGGTGTAACCGGCTTTTTTGAT

CAGATGAGTTGAGAGTGTACGATAGACGATACTCAAGACCTGGCCCATCAGCTGGGGATG

GCGAGCCAGCAAAAAGCGTAGCTGGAAAGGAAAGCTGAGCACCCACTGGCGAATGGGCTC

CTTGGGGAAGACTTCGTCTATCAGCAGCGCCGCACTCTCGGCCATCCGGCGGGCACCGCA
[truncated: 5,756,366 more chars]
